# Supplementary material for: Dynamic Adaptive Response of Pseudomonas aeruginosa to Clindamycin/Rifampicin-Impregnated Catheters
Source: MDPI journal article supplement (doi:10.3390/antibiotics10070752), 2021-06-22

**Table. S1.** Minimum inhibitory concentration (MIC) of planktonic and biofilm cells grown with control and antibiotic-impregnated catheters in the continuous culture system

|                         | Control catheter |          | Antibiotic catheter |          |
|-------------------------|------------------|----------|---------------------|----------|
|                         | Planktonic       | Biofilm  | Planktonic          | Biofilm  |
| Amikacin                | ≤2 (S)           | ≤2 (S)   | 4 (S)               | ≤2 (S)   |
| Cefazolin               | ≥64 (R)          | ≥64 (R)  | ≥64 (R)             | ≥64 (R)  |
| Cefepime                | ≤1 (S)           | ≤1 (S)   | ≤1 (S)              | ≤1 (S)   |
| Cefotaxime              | 8 (S)            | 8 (S)    | 8 (S)               | 8 (S)    |
| Ceftazidime             | ≤1 (S)           | ≤1 (S)   | ≤1 (S)              | ≤1 (S)   |
| Ciprofloxacin           | ≤0.25            | ≤0.25    | ≤0.25               | ≤0.25    |
| Clindamycin             | 512 (R)          | 512 (R)  | 512 (R)             | 512 (R)  |
| Doripenem               | 0.5 (S)          | 0.5 (S)  | 0.5 (S)             | 0.5 (S)  |
| Gentamicin              | ≤1 (S)           | ≤1 (S)   | ≤1 (S)              | ≤1 (S)   |
| Imipenem                | 1 (S)            | 1 (S)    | 0.5 (S)             | 0.5 (S)  |
| Levofloxacin            | 0.5 (S)          | 0.5 (S)  | 0.5 (S)             | 0.5 (S)  |
| Meropenem               | 1 (S)            | 0.5 (S)  | 0.5 (S)             | 0.5 (S)  |
| Norfloxacin             | ≤0.5 (S)         | ≤0.5 (S) | ≤0.5 (S)            | ≤0.5 (S) |
| Piperacillin            | ≤4 (S)           | ≤4 (S)   | ≤4 (S)              | ≤4 (S)   |
| Piperacillin/tazobactam | ≤4 (S)           | ≤4 (S)   | ≤4 (S)              | ≤4 (S)   |
| Rifampicin              | 32 (R)           | 32 (R)   | 32 (R)              | 32 (R)   |
| Tigecycline             | ≥8 (R)           | ≥8 (R)   | ≥8 (R)              | ≥8 (R)   |
| Tobramycin              | ≤1 (S)           | ≤1 (S)   | ≤1 (S)              | ≤1 (S)   |

Table S2. Differentially regulated proteins of planktonic cells grown with control (CP) and antibiotic-coated (AP) catheters

| Locus Tag | Gene Name | Product Name                                                     | N_C-P    | N_A-P    | Fold Ratio | COG ID  | CODE | COG Function                                                  | KOID   | Functional Category                |
|-----------|-----------|------------------------------------------------------------------|----------|----------|------------|---------|------|---------------------------------------------------------------|--------|------------------------------------|
| PA0002    | dnaN      | "DNA polymerase III                                              | 0        | 20389248 | 1000       | COG0592 | L    | DNA polymerase sliding clamp subunit (PCNA homolog)           | K02338 | INFORMATION STORAGE AND PROCESSING |
| PA0002    | dnaN      | "DNA polymerase III                                              | 0        | 20389248 | 1000       | COG0592 | L    | DNA polymerase sliding clamp subunit (PCNA homolog)           | K04802 | INFORMATION STORAGE AND PROCESSING |
| PA0008    | glyS      | glycyl-tRNA synthetase beta chain                                | 0        | 60105885 | 1000       | COG0751 | J    | "Glycyl-tRNA synthetase, beta subunit"                        | K01879 | INFORMATION STORAGE AND PROCESSING |
| PA0019    | def       | polypeptide deformylase                                          | 0        | 50940599 | 1000       | COG0242 | J    | N-formylmethionyl-tRNA deformylase                            | K01462 | INFORMATION STORAGE AND PROCESSING |
| PA0039    |           | hypothetical protein                                             | 1.32E+08 | 1.99E+08 | 1.501851   |         |      |                                                               |        |                                    |
| PA0055    |           | hypothetical protein                                             | 12859631 | 5.91E+08 | 45.93392   | COG3812 | S    | Uncharacterized protein conserved in bacteria                 | K09983 | POORLY CHARACTERIZED               |
| PA0060    |           | conserved hypothetical protein                                   | 46835654 | 0        | 0          |         |      |                                                               |        |                                    |
| PA0068    |           | hypothetical protein                                             | 87949650 | 0        | 0          | COG3529 | R    | Predicted nucleic-acid-binding protein containing a Zn-ribbon | K07070 | POORLY CHARACTERIZED               |
| PA0070    | tagQ1     | TagQ1                                                            | 4.51E+08 | 2.07E+08 | 0.458318   |         |      |                                                               |        |                                    |
| PA0083    | tsbB1     | TsbB1                                                            | 1.17E+08 | 32861605 | 0.282043   | COG3516 | S    | Uncharacterized protein conserved in bacteria                 | K11901 | POORLY CHARACTERIZED               |
| PA0102    |           | probable carbonic anhydrase                                      | 21237673 | 67188705 | 3.163657   | COG0288 | P    | Carbonic anhydrase                                            | K01673 | METABOLISM                         |
| PA0103    |           | probable sulfate transporter                                     | 3.85E+08 | 4.17E+08 | 1.081551   | COG0659 | P    | Sulfate permease and related transporters (MFS superfamily)   | K03321 | METABOLISM                         |
| PA0125    |           | ParD antitoxin                                                   | 22238845 | 0        | 0          |         |      |                                                               |        |                                    |
| PA0128    |           | conserved hypothetical protein                                   | 6.65E+08 | 5.32E+08 | 0.800077   | COG2824 | P    | Uncharacterized Zn-ribbon-containing protein involved in pho  | K06193 | METABOLISM                         |
| PA0139    | ahpC      | alkyl hydroperoxide reductase subunit C                          | 4.1E+09  | 8.75E+09 | 2.132725   | COG0450 | O    | Peroxiredoxin                                                 | K03386 | CELLULAR PROCESSES AND SIGNALING   |
| PA0141    |           | conserved hypothetical protein                                   | 1.21E+09 | 6.74E+08 | 0.554969   |         |      |                                                               |        |                                    |
| PA0141    |           | conserved hypothetical protein                                   | 5.84E+08 | 1.22E+08 | 0.209261   |         |      |                                                               |        |                                    |
| PA0143    | nuh       | purine nucleosidase Nuh                                          | 0        | 30771462 | 1000       | COG1957 | F    | Inosine-uridine nucleoside N-ribosylhydrolase                 | K01239 | METABOLISM                         |
| PA0143    | nuh       | purine nucleosidase Nuh                                          | 0        | 30771462 | 1000       | COG1957 | F    | Inosine-uridine nucleoside N-ribosylhydrolase                 | K01250 | METABOLISM                         |
| PA0156    | trIA      | "Resistance-Nodulation-Cell Division (RND) tricolan efflux memb  | 1.71E+08 | 1.65E+08 | 0.96745    | COG0845 | M    | Membrane-fusion protein                                       | K02022 | CELLULAR PROCESSES AND SIGNALING   |
| PA0156    | trIA      | "Resistance-Nodulation-Cell Division (RND) tricolan efflux memb  | 1.71E+08 | 1.65E+08 | 0.96745    | COG0845 | M    | Membrane-fusion protein                                       | K02005 | CELLULAR PROCESSES AND SIGNALING   |
| PA0156    | trIA      | "Resistance-Nodulation-Cell Division (RND) tricolan efflux memb  | 1.71E+08 | 1.65E+08 | 0.96745    | COG0845 | M    | Membrane-fusion protein                                       | K01593 | CELLULAR PROCESSES AND SIGNALING   |
| PA0156    | trIA      | "Resistance-Nodulation-Cell Division (RND) tricolan efflux memb  | 1.71E+08 | 1.65E+08 | 0.96745    | COG0845 | M    | Membrane-fusion protein                                       | K03585 | CELLULAR PROCESSES AND SIGNALING   |
| PA0169    | siaD      | SiaD                                                             | 1.99E+09 | 8.27E+08 | 0.415427   | COG3706 | T    | Response regulator containing a CheY-like receiver domain an  | K02488 | CELLULAR PROCESSES AND SIGNALING   |
| PA0170    |           | hypothetical protein                                             | 73438381 | 0        | 0          |         |      |                                                               |        |                                    |
| PA0180    | cttP      | "chemotactic transducer for trichloroethylene [positive chemotax | 0        | 6.58E+08 | 1000       | COG0840 | N    | Methyl-accepting chemotaxis protein                           | K03406 | CELLULAR PROCESSES AND SIGNALING   |
| PA0180    | cttP      | "chemotactic transducer for trichloroethylene [positive chemotax | 0        | 6.58E+08 | 1000       | COG0840 | T    | Methyl-accepting chemotaxis protein                           | K03406 | CELLULAR PROCESSES AND SIGNALING   |
| PA0265    | davD      | glutaric semialdehyde dehydrogenase                              | 0        | 98013613 | 1000       | COG1012 | C    | NAD-dependent aldehyde dehydrogenases                         | K00135 | METABOLISM                         |
| PA0265    | davD      | glutaric semialdehyde dehydrogenase                              | 0        | 98013613 | 1000       | COG1012 | C    | NAD-dependent aldehyde dehydrogenases                         | K00128 | METABOLISM                         |
| PA0265    | davD      | glutaric semialdehyde dehydrogenase                              | 0        | 98013613 | 1000       | COG1012 | C    | NAD-dependent aldehyde dehydrogenases                         | K00130 | METABOLISM                         |
| PA0265    | davD      | glutaric semialdehyde dehydrogenase                              | 0        | 98013613 | 1000       | COG1012 | C    | NAD-dependent aldehyde dehydrogenases                         | K00140 | METABOLISM                         |
| PA0266    | davT      | delta-aminovalerate aminotransferase                             | 0        | 1.22E+08 | 1000       | COG0160 | E    | 4-aminobutyrate aminotransferase and related aminotransfer    | K00823 | METABOLISM                         |
| PA0266    | davT      | delta-aminovalerate aminotransferase                             | 0        | 1.22E+08 | 1000       | COG0160 | E    | 4-aminobutyrate aminotransferase and related aminotransfer    | K07250 | METABOLISM                         |
| PA0266    | davT      | delta-aminovalerate aminotransferase                             | 0        | 1.22E+08 | 1000       | COG0160 | E    | 4-aminobutyrate aminotransferase and related aminotransfer    | K00836 | METABOLISM                         |
| PA0267    |           | hypothetical protein                                             | 0        | 1.46E+08 | 1000       | COG0784 | T    | FOG: CheY-like receiver                                       | K03413 | CELLULAR PROCESSES AND SIGNALING   |
| PA0291    | oprE      | Anaerobically-induced outer membrane porin OprE precursor        | 13774199 | 0        | 0          |         |      |                                                               |        |                                    |
| PA0295    |           | probable periplasmic polyamine binding protein                   | 17894714 | 0        | 0          | COG0687 | E    | Spermidine/putrescine-binding periplasmic protein             | K11073 | METABOLISM                         |
| PA0295    |           | probable periplasmic polyamine binding protein                   | 17894714 | 0        | 0          | COG0687 | E    | Spermidine/putrescine-binding periplasmic protein             | K02055 | METABOLISM                         |
| PA0295    |           | probable periplasmic polyamine binding protein                   | 17894714 | 0        | 0          | COG0687 | E    | Spermidine/putrescine-binding periplasmic protein             | K11069 | METABOLISM                         |
| PA0300    | spuD      | polyamine transport protein                                      | 85617247 | 1.17E+08 | 1.369171   | COG0687 | E    | Spermidine/putrescine-binding periplasmic protein             | K11073 | METABOLISM                         |
| PA0300    | spuD      | polyamine transport protein                                      | 85617247 | 1.17E+08 | 1.369171   | COG0687 | E    | Spermidine/putrescine-binding periplasmic protein             | K02055 | METABOLISM                         |
| PA0300    | spuD      | polyamine transport protein                                      | 85617247 | 1.17E+08 | 1.369171   | COG0687 | E    | Spermidine/putrescine-binding periplasmic protein             | K11069 | METABOLISM                         |
| PA0309    |           | hypothetical protein                                             | 17171396 | 0        | 0          |         |      |                                                               |        |                                    |
| PA0314    |           | L-cysteine transporter of ABC system FliY                        | 4.76E+08 | 1.64E+08 | 0.343572   | COG0834 | E    | "ABC-type amino acid transport/signal transduction systems, j | K02030 | METABOLISM                         |
| PA0314    |           | L-cysteine transporter of ABC system FliY                        | 4.76E+08 | 1.64E+08 | 0.343572   | COG0834 | T    | "ABC-type amino acid transport/signal transduction systems, j | K02030 | CELLULAR PROCESSES AND SIGNALING   |
| PA0315    |           | hypothetical protein                                             | 70521023 | 4.45E+08 | 6.310245   |         |      |                                                               |        |                                    |
| PA0316    | serA      | PHGDH                                                            | 37738148 | 1.27E+08 | 3.364903   | COG0111 | H    | Phosphoglycerate dehydrogenase and related dehydrogenase      | K12972 | METABOLISM                         |
| PA0316    | serA      | PHGDH                                                            | 37738148 | 1.27E+08 | 3.364903   | COG0111 | E    | Phosphoglycerate dehydrogenase and related dehydrogenase      | K03473 | METABOLISM                         |
| PA0316    | serA      | PHGDH                                                            | 37738148 | 1.27E+08 | 3.364903   | COG0111 | H    | Phosphoglycerate dehydrogenase and related dehydrogenase      | K00058 | METABOLISM                         |
| PA0316    | serA      | PHGDH                                                            | 37738148 | 1.27E+08 | 3.364903   | COG0111 | E    | Phosphoglycerate dehydrogenase and related dehydrogenase      | K12972 | METABOLISM                         |
| PA0316    | serA      | PHGDH                                                            | 37738148 | 1.27E+08 | 3.364903   | COG0111 | E    | Phosphoglycerate dehydrogenase and related dehydrogenase      | K00058 | METABOLISM                         |
| PA0316    | serA      | PHGDH                                                            | 37738148 | 1.27E+08 | 3.364903   | COG0111 | H    | Phosphoglycerate dehydrogenase and related dehydrogenase      | K03473 | METABOLISM                         |
| PA0318    |           | conserved hypothetical protein                                   | 2.09E+08 | 2.6E+08  | 1.243267   | COG0179 | Q    | "2-keto-4-pentenolase hydratase/2-oxohepta-3-ene-1,7-dioic    | K01555 | METABOLISM                         |
| PA0318    |           | conserved hypothetical protein                                   | 2.09E+08 | 2.6E+08  | 1.243267   | COG0179 | Q    | "2-keto-4-pentenolase hydratase/2-oxohepta-3-ene-1,7-dioic    | K05921 | METABOLISM                         |
| PA0329    |           | conserved hypothetical protein                                   | 2.75E+09 | 1.45E+09 | 0.528356   | COG422  | S    | Uncharacterized conserved protein                             | K09946 | POORLY CHARACTERIZED               |
| PA0330    | rpIA      | ribiose 5-phosphate isomerase                                    | 1.05E+09 | 4.45E+08 | 0.421507   | COG0120 | G    | Ribose 5-phosphate isomerase                                  | K01807 | METABOLISM                         |
| PA0355    | pfpl      | protease Pfpl                                                    | 0        | 46275980 | 1000       | COG0693 | R    | Putative intracellular protease/amidase                       | K03152 | POORLY CHARACTERIZED               |
| PA0355    | pfpl      | protease Pfpl                                                    | 0        | 46275980 | 1000       | COG0693 | R    | Putative intracellular protease/amidase                       | K05520 | POORLY CHARACTERIZED               |
| PA0359    |           | hypothetical protein                                             | 21629401 | 81404931 | 3.763624   |         |      |                                                               |        |                                    |
| PA0361    |           | probable gamma-glutamyltranspeptidase precursor                  | 23775637 | 26200578 | 1.101993   | COG0405 | E    | Gamma-glutamyltransferase                                     | K00681 | METABOLISM                         |
| PA0363    | coaD      | phosphopantetheine adenylyltransferase                           | 0        | 28722947 | 1000       | COG0669 | H    | Phosphopantetheine adenylyltransferase                        | K00954 | METABOLISM                         |
| PA0364    | laaA      | LaaA                                                             | 37450094 | 0        | 0          | COG2303 | E    | Choline dehydrogenase and related flavoproteins               | K00108 | METABOLISM                         |
| PA0364    | laaA      | LaaA                                                             | 37450094 | 0        | 0          | COG2303 | E    | Choline dehydrogenase and related flavoproteins               | K03333 | METABOLISM                         |
| PA0364    | laaA      | LaaA                                                             | 37450094 | 0        | 0          | COG2303 | E    | Choline dehydrogenase and related flavoproteins               | K00119 | METABOLISM                         |
| PA0371    |           | hypothetical protein                                             | 3.27E+08 | 3.52E+08 | 1.076843   | COG0612 | R    | Predicted Zn-dependent peptidases                             | K07263 | POORLY CHARACTERIZED               |
| PA0371    |           | hypothetical protein                                             | 3.27E+08 | 3.52E+08 | 1.076843   | COG0612 | R    | Predicted Zn-dependent peptidases                             | K01422 | POORLY CHARACTERIZED               |
| PA0371    |           | hypothetical protein                                             | 3.27E+08 | 3.52E+08 | 1.076843   | COG0612 | R    | Predicted Zn-dependent peptidases                             | K01412 | POORLY CHARACTERIZED               |
| PA0371    |           | hypothetical protein                                             | 3.27E+08 | 3.52E+08 | 1.076843   | COG0612 | R    | Predicted Zn-dependent peptidases                             | K01423 | POORLY CHARACTERIZED               |
| PA0372    |           | probable zinc protease                                           | 77002810 | 1.2E+08  | 1.558446   | COG0612 | R    | Predicted Zn-dependent peptidases                             | K01422 | POORLY CHARACTERIZED               |
| PA0372    |           | probable zinc protease                                           | 77002810 | 1.2E+08  | 1.558446   | COG0612 | R    | Predicted Zn-dependent peptidases                             | K01412 | POORLY CHARACTERIZED               |
| PA0372    |           | probable zinc protease                                           | 77002810 | 1.2E+08  | 1.558446   | COG0612 | R    | Predicted Zn-dependent peptidases                             | K01423 | POORLY CHARACTERIZED               |
| PA0373    | ftsY      | signal recognition particle receptor FtsY                        | 26698447 | 77436625 | 2.900417   | COG0552 | U    | Signal recognition particle GTPase                            | K03110 | CELLULAR PROCESSES AND SIGNALING   |
| PA0387    |           | conserved hypothetical protein                                   | 92962927 | 0        | 0          | COG0127 | F    | Xanthosine triphosphate pyrophosphatase                       | K01516 | METABOLISM                         |
| PA0388    |           | hypothetical protein                                             | 1.8E+08  | 1.44E+08 | 0.800565   |         |      |                                                               |        |                                    |
| PA0394    |           | conserved hypothetical protein                                   | 1.57E+08 | 0        | 0          | COG0325 | R    | Predicted enzyme with a TIM-barrel fold                       | K06997 | POORLY CHARACTERIZED               |
| PA0399    |           | cystathionine beta-synthase                                      | 0        | 76072303 | 1000       | COG0517 | R    | FOG: CBS domain                                               | K00088 | POORLY CHARACTERIZED               |
| PA0399    |           | cystathionine beta-synthase                                      | 0        | 76072303 | 1000       | COG0517 | R    | FOG: CBS domain                                               | K06041 | POORLY CHARACTERIZED               |
| PA0399    |           | cystathionine beta-synthase                                      | 0        | 76072303 | 1000       | COG0031 | E    | Cysteine synthase                                             | K12339 | METABOLISM                         |
| PA0399    |           | cystathionine beta-synthase                                      | 0        | 76072303 | 1000       | COG0031 | E    | Cysteine synthase                                             | K01738 | METABOLISM                         |
| PA0399    |           | cystathionine beta-synthase                                      | 0        | 76072303 | 1000       | COG0031 | E    | Cysteine synthase                                             | K01697 | METABOLISM                         |
| PA0400    |           | probable cystathionine gamma-lyase                               | 0        | 29884999 | 1000       | COG0626 | E    | Cystathionine beta-lyases/cystathionine gamma-synthases       | K01760 | METABOLISM                         |
| PA0400    |           | probable cystathionine gamma-lyase                               | 0        | 29884999 | 1000       | COG0626 | E    | Cystathionine beta-lyases/cystathionine gamma-synthases       | K01764 | METABOLISM                         |
| PA0400    |           | probable cystathionine gamma-lyase                               | 0        | 29884999 | 1000       | COG0626 | E    | Cystathionine beta-lyases/cystathionine gamma-synthases       | K01761 | METABOLISM                         |
| PA0400    |           | probable cystathionine gamma-lyase                               | 0        | 29884999 | 1000       | COG0626 | E    | Cystathionine beta-lyases/cystathionine gamma-synthases       | K01739 | METABOLISM                         |
| PA0400    |           | probable cystathionine gamma-lyase                               | 0        | 29884999 | 1000       | COG0626 | E    | Cystathionine beta-lyases/cystathionine gamma-synthases       | K01758 | METABOLISM                         |
| PA0403    | pyrR      | transcriptional regulator PyrR                                   | 91839580 | 1.52E+08 | 1.654338   | COG0605 | F    | Pyrimidine operon attenuation protein/uracil phosphoribosylt  | K02825 | METABOLISM                         |
| PA0408    | piIG      | twitching motility protein PiIG                                  | 1.23E+08 | 0        | 0          | COG0745 | T    | Response regulators consisting of a CheY-like receiver domain | K02483 | CELLULAR PROCESSES AND SIGNALING   |
| PA0408    | piIG      | twitching motility protein PiIG                                  | 1.23E+08 | 0        | 0          | COG0745 | K    | Response regulators consisting of a CheY-like receiver domain | K02483 | INFORMATION STORAGE AND PROCESSING |
| PA0409    | piIH      | twitching motility protein PiIH                                  | 1.42E+09 | 1.12E+09 | 0.787328   | COG0745 | K    | Response regulators consisting of a CheY-like receiver domain | K02483 | CELLULAR PROCESSES AND SIGNALING   |
| PA0409    | piIH      | twitching motility protein PiIH                                  | 1.42E+09 | 1.12E+09 | 0.787328   | COG0745 | K    | Response regulators consisting of a CheY-like receiver domain | K02483 | INFORMATION STORAGE AND PROCESSING |
| PA0411    | piII      | twitching motility protein PiII                                  | 3.88E+09 | 2.89E+09 | 0.743921   | COG0840 | T    | Methyl-accepting chemotaxis protein                           | K03406 | CELLULAR PROCESSES AND SIGNALING   |
| PA0411    | piII      | twitching motility protein PiII                                  | 3.88E+09 | 2.89E+09 | 0.743921   | COG0840 | N    | Methyl-accepting chemotaxis protein                           | K03406 | CELLULAR PROCESSES AND SIGNALING   |
| PA0413    | chpA      | component of chemotactic signal transduction system              | 1.2E+08  | 1.2E+08  | 1.002058   | COG2198 | T    | FOG: HPT domain                                               | K07676 | CELLULAR PROCESSES AND SIGNALING   |
| PA0413    | chpA      | component of chemotactic signal transduction system              | 1.2E+08  | 1.2E+08  | 1.002058   | COG2198 | T    | FOG: HPT domain                                               | K07648 | CELLULAR PROCESSES AND SIGNALING   |
| PA0413    | chpA      | component of chemotactic signal transduction system              | 1.2E+08  | 1.2E+08  | 1.002058   | COG2198 | T    | FOG: HPT domain                                               | K07647 | CELLULAR PROCESSES AND SIGNALING   |
| PA0413    | chpA      | component of chemotactic signal transduction system              | 1.2E+08  | 1.2E+08  | 1.002058   | COG2198 | T    | FOG: HPT domain                                               | K07678 | CELLULAR PROCESSES AND SIGNALING   |
| PA0413    | chpA      | component of chemotactic signal transduction system              | 1.2E+08  | 1.2E+08  | 1.002058   | COG0643 | T    | Chemotaxis protein histidine kinase and related kinases       | K02487 | CELLULAR PROCESSES AND SIGNALING   |
| PA0413    | chpA      | component of chemotactic signal transduction system              | 1.2E+08  | 1.2E+08  | 1.002058   | COG0643 | T    | Chemotaxis protein histidine kinase and related kinases       | K03407 | CELLULAR PROCESSES AND SIGNALING   |
| PA0413    | chpA      | component of chemotactic signal transduction system              | 1.2E+08  | 1.2E+08  | 1.002058   | COG2198 | T    | FOG: HPT domain                                               | K07679 | CELLULAR PROCESSES AND SIGNALING   |
| PA0413    | chpA      | component of chemotactic signal transduction system              | 1.2E+08  | 1.2E+08  | 1.002058   | COG0784 | T    | FOG: CheY-like receiver                                       | K03413 | CELLULAR PROCESSES AND SIGNALING   |
| PA0413    | chpA      | component of chemotactic signal transduction system              | 1.2E+08  | 1.2E+08  | 1.002058   | COG0643 | N    | Chemotaxis protein histidine kinase and related kinases       | K06596 | CELLULAR PROCESSES AND SIGNALING   |
| PA0413    | chpA      | component of chemotactic signal transduction system              | 1.2E+08  | 1.2E+08  | 1.002058   | COG0643 | N    | Chemotaxis protein histidine kinase and related kinases       | K06596 | CELLULAR PROCESSES AND SIGNALING   |
| PA0413    | chpA      | component of chemotactic signal transduction system              | 1.2E+08  | 1.2E+08  | 1.002058   | COG0643 | N    | Chemotaxis protein histidine kinase and related kinases       | K02487 | CELLULAR PROCESSES AND SIGNALING   |
| PA0413    | chpA      | component of chemotactic signal transduction system              | 1.2E+08  | 1.2E+08  | 1.002058   | COG0643 | N    | Chemotaxis protein histidine kinase and related kinases       | K03407 | CELLULAR PROCESSES AND SIGNALING   |
| PA0419    |           | conserved hypothetical protein                                   | 0        | 52785791 | 1000       | COG1385 | S    | Uncharacterized protein conserved in bacteria                 | K09761 | POORLY CHARACTERIZED               |
| PA0423    | pasP      | PasP                                                             | 1.42E+09 | 3.5E+09  | 2.470571   |         |      |                                                               |        |                                    |
| PA0425    | mexA      | Resistance-Nodulation-Cell Division (RND) multidrug efflux memb  | 3.12E+08 | 2.22E+08 | 0.711067   | COG0845 | M    | Membrane-fusion protein                                       | K02022 | CELLULAR PROCESSES AND SIGNALING   |
| PA0425    | mexA      | Resistance-Nodulation-Cell Division (RND) multidrug efflux memb  | 3.       |          |            |         |      |                                                               |        |                                    |

|        |                                                                      |          |          |          |         |   |                                                                  |        |                                    |
|--------|----------------------------------------------------------------------|----------|----------|----------|---------|---|------------------------------------------------------------------|--------|------------------------------------|
| PA0459 | probable ClpA/B protease ATP binding subunit                         | 6.9E+08  | 5.32E+08 | 0.771326 | COG0542 | O | "ATPases with chaperone activity, ATP-binding subunit"           | K11907 | CELLULAR PROCESSES AND SIGNALING   |
| PA0459 | probable ClpA/B protease ATP binding subunit                         | 6.9E+08  | 5.32E+08 | 0.771326 | COG0542 | O | "ATPases with chaperone activity, ATP-binding subunit"           | K03696 | CELLULAR PROCESSES AND SIGNALING   |
| PA0459 | probable ClpA/B protease ATP binding subunit                         | 6.9E+08  | 5.32E+08 | 0.771326 | COG0542 | O | "ATPases with chaperone activity, ATP-binding subunit"           | K03695 | CELLULAR PROCESSES AND SIGNALING   |
| PA0459 | probable ClpA/B protease ATP binding subunit                         | 6.9E+08  | 5.32E+08 | 0.771326 | COG0542 | O | "ATPases with chaperone activity, ATP-binding subunit"           | K03694 | CELLULAR PROCESSES AND SIGNALING   |
| PA0460 | hypothetical protein                                                 | 3.62E+08 | 3.97E+08 | 1.096053 |         |   |                                                                  |        |                                    |
| PA0468 | hypothetical protein                                                 | 27589152 | 4.43E+08 | 16.04688 |         |   |                                                                  |        |                                    |
| PA0482 | glcB malate synthase G                                               | 0        | 34328605 | 1000     | COG2225 | C | Malate synthase                                                  | K01638 | METABOLISM                         |
| PA0500 | bioB biotin synthase                                                 | 0        | 15571364 | 1000     | COG0502 | H | Biotin synthase and related enzymes                              | K01012 | METABOLISM                         |
| PA0506 | probable acyl-CoA dehydrogenase                                      | 0        | 18133796 | 1000     | COG1960 | I | Acyl-CoA dehydrogenases                                          | K00249 | METABOLISM                         |
| PA0506 | probable acyl-CoA dehydrogenase                                      | 0        | 18133796 | 1000     | COG1960 | I | Acyl-CoA dehydrogenases                                          | K00257 | METABOLISM                         |
| PA0518 | nirM cytochrome c-551 precursor                                      | 1.02E+08 | 0        | 0        |         |   |                                                                  |        |                                    |
| PA0519 | nirS nitrite reductase precursor                                     | 0        | 2.32E+08 | 1000     | COG2010 | C | "Cytochrome c, mono- and diheme variants"                        | K02275 | METABOLISM                         |
| PA0519 | nirS nitrite reductase precursor                                     | 0        | 2.32E+08 | 1000     | COG2010 | C | "Cytochrome c, mono- and diheme variants"                        | K00406 | METABOLISM                         |
| PA0541 | hypothetical protein                                                 | 1.28E+09 | 8.36E+08 | 0.655002 |         |   |                                                                  |        |                                    |
| PA0546 | metK methionine adenosyltransferase                                  | 2.4E+08  | 3.71E+08 | 1.546574 | COG0192 | H | S-adenosylmethionine synthetase                                  | K00789 | METABOLISM                         |
| PA0548 | tktA transketolase                                                   | 0        | 70911909 | 1000     | COG0021 | G | Transketolase                                                    | K00615 | METABOLISM                         |
| PA0552 | pgk phosphoglycerate kinase                                          | 94645399 | 1.81E+08 | 1.909958 | COG0126 | G | 3-phosphoglycerate kinase                                        | K00927 | METABOLISM                         |
| PA0555 | fdx fructose-1                                                       | 3.69E+08 | 2.92E+09 | 7.913151 | COG0191 | G | Fructose/tagatose biphosphate aldolase                           | K01624 | METABOLISM                         |
| PA0555 | fdx fructose-1                                                       | 3.69E+08 | 2.92E+09 | 7.913151 | COG0191 | G | Fructose/tagatose biphosphate aldolase                           | K03802 | METABOLISM                         |
| PA0576 | rpoD sigma factor RpoD                                               | 8.25E+08 | 4.61E+08 | 0.558827 | COG0568 | K | "DNA-directed RNA polymerase, sigma subunit (sigma70/sigmK03808  |        | INFORMATION STORAGE AND PROCESSING |
| PA0576 | rpoD sigma factor RpoD                                               | 8.25E+08 | 4.61E+08 | 0.558827 | COG0568 | K | "DNA-directed RNA polymerase, sigma subunit (sigma70/sigmK03808  |        | INFORMATION STORAGE AND PROCESSING |
| PA0576 | rpoD sigma factor RpoD                                               | 8.25E+08 | 4.61E+08 | 0.558827 | COG0568 | K | "DNA-directed RNA polymerase, sigma subunit (sigma70/sigmK03808  |        | INFORMATION STORAGE AND PROCESSING |
| PA0577 | dnag DNA primase                                                     | 51501443 | 41766281 | 0.810973 | COG0358 | L | DNA primase (bacterial type)                                     | K02316 | INFORMATION STORAGE AND PROCESSING |
| PA0578 | conserved hypothetical protein                                       | 17981050 | 0        | 0        | COG3180 | S | Uncharacterized conserved protein                                | K09117 | POORLY CHARACTERIZED               |
| PA0579 | rpsU 30S ribosomal protein S21                                       | 1.38E+09 | 2.73E+09 | 1.982996 | COG0828 | J | Ribosomal protein S21                                            | K02970 | INFORMATION STORAGE AND PROCESSING |
| PA0587 | conserved hypothetical protein                                       | 9083028  | 29365286 | 3.232984 | COG2718 | S | Uncharacterized conserved protein                                | K09786 | POORLY CHARACTERIZED               |
| PA0588 | conserved hypothetical protein                                       | 1.95E+08 | 2.62E+08 | 1.343821 | COG2766 | T | Putative Ser protein kinase                                      | K07180 | CELLULAR PROCESSES AND SIGNALING   |
| PA0591 | conserved hypothetical protein                                       | 46039596 | 0        | 0        | COG2967 | P | Uncharacterized protein affecting Mg2+ transport                 | K06195 | METABOLISM                         |
| PA0594 | surA peptidyl-prolyl cis-trans isomerase SurA                        | 6.37E+08 | 3.97E+08 | 0.623496 | COG0760 | O | Parvulin-like peptidyl-prolyl isomerase                          | K03769 | CELLULAR PROCESSES AND SIGNALING   |
| PA0594 | surA peptidyl-prolyl cis-trans isomerase SurA                        | 6.37E+08 | 3.97E+08 | 0.623496 | COG0760 | O | Parvulin-like peptidyl-prolyl isomerase                          | K03769 | CELLULAR PROCESSES AND SIGNALING   |
| PA0594 | surA peptidyl-prolyl cis-trans isomerase SurA                        | 6.37E+08 | 3.97E+08 | 0.623496 | COG0760 | O | Parvulin-like peptidyl-prolyl isomerase                          | K07533 | CELLULAR PROCESSES AND SIGNALING   |
| PA0594 | surA peptidyl-prolyl cis-trans isomerase SurA                        | 6.37E+08 | 3.97E+08 | 0.623496 | COG0760 | O | Parvulin-like peptidyl-prolyl isomerase                          | K03771 | CELLULAR PROCESSES AND SIGNALING   |
| PA0594 | surA peptidyl-prolyl cis-trans isomerase SurA                        | 6.37E+08 | 3.97E+08 | 0.623496 | COG0760 | O | Parvulin-like peptidyl-prolyl isomerase                          | K07533 | CELLULAR PROCESSES AND SIGNALING   |
| PA0594 | surA peptidyl-prolyl cis-trans isomerase SurA                        | 6.37E+08 | 3.97E+08 | 0.623496 | COG0760 | O | Parvulin-like peptidyl-prolyl isomerase                          | K03769 | CELLULAR PROCESSES AND SIGNALING   |
| PA0594 | surA peptidyl-prolyl cis-trans isomerase SurA                        | 6.37E+08 | 3.97E+08 | 0.623496 | COG0760 | O | Parvulin-like peptidyl-prolyl isomerase                          | K03770 | CELLULAR PROCESSES AND SIGNALING   |
| PA0594 | surA peptidyl-prolyl cis-trans isomerase SurA                        | 6.37E+08 | 3.97E+08 | 0.623496 | COG0760 | O | Parvulin-like peptidyl-prolyl isomerase                          | K03769 | CELLULAR PROCESSES AND SIGNALING   |
| PA0594 | surA peptidyl-prolyl cis-trans isomerase SurA                        | 6.37E+08 | 3.97E+08 | 0.623496 | COG0760 | O | Parvulin-like peptidyl-prolyl isomerase                          | K03770 | CELLULAR PROCESSES AND SIGNALING   |
| PA0594 | surA peptidyl-prolyl cis-trans isomerase SurA                        | 6.37E+08 | 3.97E+08 | 0.623496 | COG0760 | O | Parvulin-like peptidyl-prolyl isomerase                          | K03771 | CELLULAR PROCESSES AND SIGNALING   |
| PA0594 | surA peptidyl-prolyl cis-trans isomerase SurA                        | 6.37E+08 | 3.97E+08 | 0.623496 | COG0760 | O | Parvulin-like peptidyl-prolyl isomerase                          | K03770 | CELLULAR PROCESSES AND SIGNALING   |
| PA0594 | surA peptidyl-prolyl cis-trans isomerase SurA                        | 6.37E+08 | 3.97E+08 | 0.623496 | COG0760 | O | Parvulin-like peptidyl-prolyl isomerase                          | K03770 | CELLULAR PROCESSES AND SIGNALING   |
| PA0594 | surA peptidyl-prolyl cis-trans isomerase SurA                        | 6.37E+08 | 3.97E+08 | 0.623496 | COG0760 | O | Parvulin-like peptidyl-prolyl isomerase                          | K03771 | CELLULAR PROCESSES AND SIGNALING   |
| PA0594 | surA peptidyl-prolyl cis-trans isomerase SurA                        | 6.37E+08 | 3.97E+08 | 0.623496 | COG0760 | O | Parvulin-like peptidyl-prolyl isomerase                          | K03770 | CELLULAR PROCESSES AND SIGNALING   |
| PA0594 | surA peptidyl-prolyl cis-trans isomerase SurA                        | 6.37E+08 | 3.97E+08 | 0.623496 | COG0760 | O | Parvulin-like peptidyl-prolyl isomerase                          | K03771 | CELLULAR PROCESSES AND SIGNALING   |
| PA0594 | surA peptidyl-prolyl cis-trans isomerase SurA                        | 6.37E+08 | 3.97E+08 | 0.623496 | COG0760 | O | Parvulin-like peptidyl-prolyl isomerase                          | K03770 | CELLULAR PROCESSES AND SIGNALING   |
| PA0599 | hypothetical protein                                                 | 16335489 | 20413378 | 1.249659 |         |   |                                                                  |        |                                    |
| PA0654 | speD S-adenosylmethionine decarboxylase proenzyme                    | 25883174 | 40189979 | 1.552745 | COG1586 | E | S-adenosylmethionine decarboxylase                               | K01611 | METABOLISM                         |
| PA0655 | hypothetical protein                                                 | 8.41E+08 | 5.31E+08 | 0.631147 | COG2941 | H | Ubiquinone biosynthesis protein COQ7                             | K06134 | METABOLISM                         |
| PA0659 | hypothetical protein                                                 | 22540394 | 0        | 0        | COG4969 | U | "Ttp plus assembly protein, major pilin PIA"                     | K02682 | CELLULAR PROCESSES AND SIGNALING   |
| PA0659 | hypothetical protein                                                 | 22540394 | 0        | 0        | COG4969 | N | "Ttp plus assembly protein, major pilin PIA"                     | K02650 | CELLULAR PROCESSES AND SIGNALING   |
| PA0659 | hypothetical protein                                                 | 22540394 | 0        | 0        | COG4969 | N | "Ttp plus assembly protein, major pilin PIA"                     | K02655 | CELLULAR PROCESSES AND SIGNALING   |
| PA0659 | hypothetical protein                                                 | 22540394 | 0        | 0        | COG4969 | U | "Ttp plus assembly protein, major pilin PIA"                     | K02655 | CELLULAR PROCESSES AND SIGNALING   |
| PA0659 | hypothetical protein                                                 | 22540394 | 0        | 0        | COG4969 | N | "Ttp plus assembly protein, major pilin PIA"                     | K02682 | CELLULAR PROCESSES AND SIGNALING   |
| PA0659 | hypothetical protein                                                 | 22540394 | 0        | 0        | COG4969 | U | "Ttp plus assembly protein, major pilin PIA"                     | K02650 | CELLULAR PROCESSES AND SIGNALING   |
| PA0660 | NAD(P)H:quinone reductase                                            | 0        | 31816910 | 1000     | COG2070 | R | Dioxygenases related to 2-nitropropane dioxygenase               | K00459 | POORLY CHARACTERIZED               |
| PA0660 | NAD(P)H:quinone reductase                                            | 0        | 31816910 | 1000     | COG2070 | R | Dioxygenases related to 2-nitropropane dioxygenase               | K02371 | POORLY CHARACTERIZED               |
| PA0664 | hypothetical protein                                                 | 1.68E+08 | 3.63E+08 | 2.162318 |         |   |                                                                  |        |                                    |
| PA0665 | conserved hypothetical protein                                       | 4.52E+08 | 79342640 | 0.175348 | COG0316 | S | Uncharacterized conserved protein                                | K13628 | POORLY CHARACTERIZED               |
| PA0665 | conserved hypothetical protein                                       | 4.52E+08 | 79342640 | 0.175348 | COG0316 | S | Uncharacterized conserved protein                                | K07400 | POORLY CHARACTERIZED               |
| PA0668 | tyrZ tyrosyl-tRNA synthetase 2                                       | 8.59E+08 | 1.14E+09 | 1.332015 | COG0162 | J | Tyrosyl-tRNA synthetase                                          | K01866 | INFORMATION STORAGE AND PROCESSING |
| PA0672 | hemO heme oxygenase                                                  | 5.52E+08 | 1.31E+08 | 0.236952 | COG2320 | P | Heme oxygenase                                                   | K07215 | METABOLISM                         |
| PA0720 | helix destabilizing protein of bacteriophage PF1                     | 7.91E+08 | 1.03E+10 | 1.013363 |         |   |                                                                  |        |                                    |
| PA0724 | probable coat protein A of bacteriophage PF1                         | 0        | 5.85E+08 | 1000     |         |   |                                                                  |        |                                    |
| PA0727 | Pf replication initiator protein                                     | 1.88E+08 | 4.27E+08 | 2.264923 |         |   |                                                                  |        |                                    |
| PA0758 | hypothetical protein                                                 | 1.66E+08 | 77112783 | 0.46548  |         |   |                                                                  |        |                                    |
| PA0763 | mucA anti-sigma factor MucA                                          | 0        | 45205540 | 1000     | COG3073 | T | Negative regulator of sigma E activity                           | K03597 | CELLULAR PROCESSES AND SIGNALING   |
| PA0764 | mucB negative regulator for alginate biosynthesis MucB               | 29078665 | 0        | 0        | COG3026 | T | Negative regulator of sigma E activity                           | K03598 | CELLULAR PROCESSES AND SIGNALING   |
| PA0766 | mucD serine protease MucD precursor                                  | 4.77E+08 | 3.43E+08 | 0.718976 | COG0265 | O | "Trypsin-like serine proteases, typically periplasmic, contain C | K04691 | CELLULAR PROCESSES AND SIGNALING   |
| PA0766 | mucD serine protease MucD precursor                                  | 4.77E+08 | 3.43E+08 | 0.718976 | COG0265 | O | "Trypsin-like serine proteases, typically periplasmic, contain C | K01362 | CELLULAR PROCESSES AND SIGNALING   |
| PA0773 | pdxJ pyridoxal phosphate biosynthetic protein PdxJ                   | 0        | 30233984 | 1000     | COG0854 | H | Pyridoxal phosphate biosynthesis protein                         | K03474 | METABOLISM                         |
| PA0782 | putA proline dehydrogenase PutA                                      | 20958915 | 0        | 0        | COG0506 | E | Proline dehydrogenase                                            | K13821 | METABOLISM                         |
| PA0782 | putA proline dehydrogenase PutA                                      | 20958915 | 0        | 0        | COG0506 | E | Proline dehydrogenase                                            | K00318 | METABOLISM                         |
| PA0782 | putA proline dehydrogenase PutA                                      | 20958915 | 0        | 0        | COG4230 | C | Delta 1-pyrroline-5-carboxylate dehydrogenase                    | K13821 | METABOLISM                         |
| PA0797 | probable transcriptional regulator                                   | 25432012 | 14741705 | 0.579652 |         |   |                                                                  |        |                                    |
| PA0830 | hypothetical protein                                                 | 0        | 5.75E+08 | 1000     | COG3687 | R | Predicted metal-dependent hydrolase                              | K07044 | POORLY CHARACTERIZED               |
| PA0833 | hypothetical protein                                                 | 1.34E+09 | 1.81E+08 | 1.352414 | COG2885 | M | Outer membrane protein and related peptidoglycan-associate       | K03286 | CELLULAR PROCESSES AND SIGNALING   |
| PA0833 | hypothetical protein                                                 | 1.34E+09 | 1.81E+08 | 1.352414 | COG2885 | M | Outer membrane protein and related peptidoglycan-associate       | K03640 | CELLULAR PROCESSES AND SIGNALING   |
| PA0837 | slvD peptidyl-prolyl cis-trans isomerase SlvD                        | 1.97E+09 | 3.56E+09 | 1.810593 | COG1047 | O | FKBP-type peptidyl-prolyl cis-trans isomerases 2                 | K03774 | CELLULAR PROCESSES AND SIGNALING   |
| PA0837 | slvD peptidyl-prolyl cis-trans isomerase SlvD                        | 1.97E+09 | 3.56E+09 | 1.810593 | COG1047 | O | FKBP-type peptidyl-prolyl cis-trans isomerases 2                 | K03775 | CELLULAR PROCESSES AND SIGNALING   |
| PA0837 | slvD peptidyl-prolyl cis-trans isomerase SlvD                        | 1.97E+09 | 3.56E+09 | 1.810593 | COG1047 | O | FKBP-type peptidyl-prolyl cis-trans isomerases 2                 | K01802 | CELLULAR PROCESSES AND SIGNALING   |
| PA0838 | probable glutathione peroxidase                                      | 48266359 | 44466319 | 0.921269 | COG0386 | O | Glutathione peroxidase                                           | K00432 | CELLULAR PROCESSES AND SIGNALING   |
| PA0854 | fumC2 fumarate hydratase                                             | 4.78E+08 | 2.73E+08 | 0.570225 | COG0114 | C | Fumarase                                                         | K01679 | METABOLISM                         |
| PA0856 | hypothetical protein                                                 | 2.89E+09 | 1.91E+09 | 0.659764 | COG3184 | S | Uncharacterized protein conserved in bacteria                    | K09924 | POORLY CHARACTERIZED               |
| PA0865 | hpd 4-hydroxyphenylpyruvate dioxygenase                              | 0        | 4.48E+08 | 1000     | COG1385 | R | 4-hydroxyphenylpyruvate dioxygenase and related hemolysin:K00457 |        | POORLY CHARACTERIZED               |
| PA0865 | hpd 4-hydroxyphenylpyruvate dioxygenase                              | 0        | 4.48E+08 | 1000     | COG1385 | R | 4-hydroxyphenylpyruvate dioxygenase and related hemolysin:K00457 |        | METABOLISM                         |
| PA0867 | mliC membrane-bound lysozyme inhibitor of c-type lysozyme MliC       | 81047357 | 1.76E+08 | 2.170536 |         |   |                                                                  |        |                                    |
| PA0870 | phhC aromatic amino acid aminotransferase                            | 0        | 14098689 | 1000     | COG1448 | E | Aspartate/tyrosine/aromatic aminotransferase                     | K00832 | METABOLISM                         |
| PA0870 | phhC aromatic amino acid aminotransferase                            | 0        | 14098689 | 1000     | COG1448 | E | Aspartate/tyrosine/aromatic aminotransferase                     | K00813 | METABOLISM                         |
| PA0871 | phhB pterin-4-alpha-carbinolamine dehydratase                        | 36923536 | 4.54E+08 | 12.30245 | COG2154 | H | Pterin-4a-carbinolamine dehydratase                              | K01724 | METABOLISM                         |
| PA0887 | acsA acetyl-coenzyme A synthetase                                    | 0        | 40170708 | 1000     | COG0365 | I | Acyl-coenzyme A synthetases/AMP-(fatty) acid ligases             | K01907 | METABOLISM                         |
| PA0887 | acsA acetyl-coenzyme A synthetase                                    | 0        | 40170708 | 1000     | COG0365 | I | Acyl-coenzyme A synthetases/AMP-(fatty) acid ligases             | K01908 | METABOLISM                         |
| PA0887 | acsA acetyl-coenzyme A synthetase                                    | 0        | 40170708 | 1000     | COG0365 | I | Acyl-coenzyme A synthetases/AMP-(fatty) acid ligases             | K01907 | METABOLISM                         |
| PA0888 | aoiJ arginine/ornithine binding protein AoiJ                         | 9.48E+08 | 5.72E+08 | 0.603688 | COG0834 | E | "ABC-type amino acid transport/signal transduction systems, i    | K02030 | CELLULAR PROCESSES AND SIGNALING   |
| PA0888 | aoiJ arginine/ornithine binding protein AoiJ                         | 9.48E+08 | 5.72E+08 | 0.603688 | COG0834 | E | "ABC-type amino acid transport/signal transduction systems, i    | K02030 | METABOLISM                         |
| PA0895 | aruc N2-Succinylornithine 5-aminotransferase [SOAT] = N2-acetylornit | 0        | 1.4E+08  | 1000     | COG4992 | E | Ornithine/acetylornithine aminotransferase                       | K00821 | METABOLISM                         |
| PA0895 | aruc N2-Succinylornithine 5-aminotransferase [SOAT] = N2-acetylornit | 0        | 1.4E+08  | 1000     | COG4992 | E | Ornithine/acetylornithine aminotransferase                       | K00818 | METABOLISM                         |
| PA0895 | aruc N2-Succinylornithine 5-aminotransferase [SOAT] = N2-acetylornit | 0        | 1.4E+08  | 1000     | COG4992 | E | Ornithine/acetylornithine aminotransferase                       | K00819 | METABOLISM                         |
| PA0899 | arub N2-Succinylarginine dihydrolase                                 | 0        | 31477862 | 1000     | COG3724 | E | Succinylarginine dihydrolase                                     | K01484 | METABOLISM                         |
| PA0900 | hypothetical protein                                                 | 17060762 | 0        | 0        |         |   |                                                                  |        |                                    |
| PA0903 | alaS alanyl-tRNA synthetase                                          | 22414644 | 1.74E+08 | 7.749393 | COG0013 | J | Alanyl-tRNA synthetase                                           | K01872 | INFORMATION STORAGE AND PROCESSING |
| PA0905 | rsmA RsmA                                                            | 3.97E+09 | 4.92E+09 | 1.238003 | COG1551 | T | Carbon storage regulator (could also regulate swarming and q     | K03563 | CELLULAR PROCESSES AND SIGNALING   |
| PA0915 | conserved hypothetical protein                                       | 53905077 | 0        | 0        |         |   |                                                                  |        |                                    |
| PA0919 | alanyl-phosphatidylglycerol hydrolase                                | 64866664 | 37689576 | 0.581032 |         |   |                                                                  |        |                                    |
| PA0932 | cysM cysteine synthase B                                             | 0        | 20722876 | 1000     | COG0031 | E | Cysteine synthase                                                | K12339 | METABOLISM                         |
| PA0932 | cysM cysteine synthase B                                             | 0        | 20722876 | 1000     | COG0031 | E | Cysteine synthase                                                | K01738 | METABOLISM                         |
| PA0932 | cysM cysteine synthase B                                             | 0        | 20722876 | 1000     | COG0031 | E | Cysteine synthase                                                | K01697 | METABOLISM                         |
| PA0937 | conserved hypothetical protein                                       | 1.36E+09 | 2.9E+09  | 2.131733 | COG3122 | S | Uncharacterized protein conserved in bacteria                    | K09912 | POORLY CHARACTERIZED               |
| PA0938 | wzz2 Wzz2                                                            | 56778463 | 0        | 0        | COG3765 | M | Chain length determinant protein                                 | K05789 | CELLULAR PROCESSES AND SIGNALING   |
| PA0938 | wzz2 Wzz2                                                            | 56778463 | 0        | 0        | COG3765 | M | Chain length determinant protein                                 | K05790 | CELLULAR PROCESSES AND SIGNALING   |
| PA0941 | hypothetical protein                                                 | 28697305 | 1.66E+08 | 5.772694 | COG0695 | O | Glutaredoxin and related proteins</                              |        |                                    |

|        |       |                                                              |          |          |          |         |   |                                                                 |         |                                    |
|--------|-------|--------------------------------------------------------------|----------|----------|----------|---------|---|-----------------------------------------------------------------|---------|------------------------------------|
| PA0962 | dps   | "DNA-binding protein from starved cells                      | 1.02E+09 | 1.67E+09 | 1.641916 | COG0783 | P | DNA-binding ferritin-like protein (oxidative damage protectan   | K04047  | METABOLISM                         |
| PA0964 | pmpR  | "pqsR-mediated PQS regulator                                 | 1.18E+08 | 5.6E+08  | 4.739545 |         |   |                                                                 |         |                                    |
| PA0969 | tolQ  | TolQ protein                                                 | 4.46E+08 | 3.67E+08 | 0.823542 | COG0811 | U | Biopolymer transport proteins                                   | K03562  | CELLULAR PROCESSES AND SIGNALING   |
| PA0969 | tolQ  | TolQ protein                                                 | 4.46E+08 | 3.67E+08 | 0.823542 | COG0811 | U | Biopolymer transport proteins                                   | K03561  | CELLULAR PROCESSES AND SIGNALING   |
| PA0970 | tolR  | TolR protein                                                 | 6.19E+08 | 5.77E+08 | 0.932034 | COG0848 | U | Biopolymer transport protein                                    | K03560  | CELLULAR PROCESSES AND SIGNALING   |
| PA0970 | tolR  | TolR protein                                                 | 6.19E+08 | 5.77E+08 | 0.932034 | COG0848 | U | Biopolymer transport protein                                    | K03559  | CELLULAR PROCESSES AND SIGNALING   |
| PA0971 | tolA  | TolA protein                                                 | 27232012 | 0        | 0        | COG0910 | M | "Periplasmic protein TonB, links inner and outer membranes"     | K03832  | CELLULAR PROCESSES AND SIGNALING   |
| PA0973 | oprl  | Peptidoglycan associated lipoprotein OprL precursor          | 2.26E+10 | 2.29E+10 | 1.014878 | COG2885 | M | Outer membrane protein and related peptidoglycan-associate      | K03640  | CELLULAR PROCESSES AND SIGNALING   |
| PA0973 | oprl  | Peptidoglycan associated lipoprotein OprL precursor          | 2.26E+10 | 2.29E+10 | 1.014878 | COG2885 | M | Outer membrane protein and related peptidoglycan-associate      | K03286  | CELLULAR PROCESSES AND SIGNALING   |
| PA0974 | pqsB  | conserved hypothetical protein                               | 9.9E+08  | 7.5E+08  | 0.757178 |         |   |                                                                 |         |                                    |
| PA0991 | hptA  | Histidine phosphotransfer protein HptA                       | 0        | 90308703 | 1000     |         |   |                                                                 |         |                                    |
| PA0997 | PqsB  | PqsB                                                         | 1.09E+08 | 2.51E+08 | 2.293008 | COG0332 | I | 3-oxoacyl-[acyl-carrier-protein] synthase III                   | K00648  | METABOLISM                         |
| PA1006 | pcp   | Protein PA1006                                               | 3.95E+08 | 2.97E+08 | 0.750135 | COG0425 | O | "Predicted redox protein, regulator of disulfide bond formatio  | K04085  | CELLULAR PROCESSES AND SIGNALING   |
| PA1008 | bcp   | bacterioferritin comigratory protein                         | 6.94E+08 | 1.46E+08 | 0.210822 | COG1225 | O | Peroxiredoxin                                                   | K03564  | CELLULAR PROCESSES AND SIGNALING   |
| PA1010 | dapA  | dihydrodipicolinate synthase                                 | 5.27E+08 | 8.13E+08 | 1.540852 | COG0329 | E | Dihydrodipicolinate synthase/N-acetylneuraminate lyase          | K01714  | METABOLISM                         |
| PA1010 | dapA  | dihydrodipicolinate synthase                                 | 5.27E+08 | 8.13E+08 | 1.540852 | COG0329 | E | Dihydrodipicolinate synthase/N-acetylneuraminate lyase          | K01639  | METABOLISM                         |
| PA1010 | dapA  | dihydrodipicolinate synthase                                 | 5.27E+08 | 8.13E+08 | 1.540852 | COG0329 | M | Dihydrodipicolinate synthase/N-acetylneuraminate lyase          | K01714  | CELLULAR PROCESSES AND SIGNALING   |
| PA1010 | dapA  | dihydrodipicolinate synthase                                 | 5.27E+08 | 8.13E+08 | 1.540852 | COG0329 | M | Dihydrodipicolinate synthase/N-acetylneuraminate lyase          | K01639  | CELLULAR PROCESSES AND SIGNALING   |
| PA1011 |       | hypothetical protein                                         | 8.51E+09 | 7.8E+09  | 0.91615  | COG3317 | M | Uncharacterized lipoprotein                                     | K07287  | CELLULAR PROCESSES AND SIGNALING   |
| PA1013 | purC  | phosphoribosylaminoimidazole-succinocarboxamide synthase     | 2.38E+08 | 7.85E+08 | 3.293792 | CG0152  | F | Phosphoribosylaminoimidazolesuccinocarboxamide (SAICAR)         | K01923  | METABOLISM                         |
| PA1031 |       | conserved hypothetical protein                               | 0        | 76136891 | 1000     | COG1322 | S | Uncharacterized protein conserved in bacteria                   | K09760  | POORLY CHARACTERIZED               |
| PA1036 |       | hypothetical protein                                         | 0        | 26315360 | 1000     |         |   |                                                                 |         |                                    |
| PA1041 |       | probable outer membrane protein precursor                    | 5.35E+08 | 8.52E+08 | 1.593352 | COG2885 | M | Outer membrane protein and related peptidoglycan-associate      | K03640  | CELLULAR PROCESSES AND SIGNALING   |
| PA1041 |       | probable outer membrane protein precursor                    | 5.35E+08 | 8.52E+08 | 1.593352 | COG2885 | M | Outer membrane protein and related peptidoglycan-associate      | K03286  | CELLULAR PROCESSES AND SIGNALING   |
| PA1049 | pdxH  | pyridoxine 5' phosphate oxidase                              | 31707612 | 3.25E+08 | 10.26288 | COG0259 | H | Pyridoxamine-phosphate oxidase                                  | K00275  | METABOLISM                         |
| PA1053 |       | conserved hypothetical protein                               | 1.02E+09 | 7.23E+08 | 0.70647  | COG1233 | M | Outer membrane lipoprotein                                      | K06077  | CELLULAR PROCESSES AND SIGNALING   |
| PA1054 | shaA  | ShaA(Probable NADH dehydrogenase)                            | 0        | 18885219 | 1000     | COG1009 | C | NADH:ubiquinone oxidoreductase subunit 5 (chain L)/Multisu      | K05577  | METABOLISM                         |
| PA1054 | shaA  | ShaA(Probable NADH dehydrogenase)                            | 0        | 18885219 | 1000     | COG1009 | P | NADH:ubiquinone oxidoreductase subunit 5 (chain L)/Multisu      | K05565  | METABOLISM                         |
| PA1054 | shaA  | ShaA(Probable NADH dehydrogenase)                            | 0        | 18885219 | 1000     | COG1211 | P | "Multisubunit Na <sup>+</sup> antiporter, MnhB subunit"         | K05565  | METABOLISM                         |
| PA1054 | shaA  | ShaA(Probable NADH dehydrogenase)                            | 0        | 18885219 | 1000     | COG1009 | P | NADH:ubiquinone oxidoreductase subunit 5 (chain L)/Multisu      | K05559  | METABOLISM                         |
| PA1054 | shaA  | ShaA(Probable NADH dehydrogenase)                            | 0        | 18885219 | 1000     | COG1211 | P | "Multisubunit Na <sup>+</sup> antiporter, MnhB subunit"         | K05559  | METABOLISM                         |
| PA1054 | shaA  | ShaA(Probable NADH dehydrogenase)                            | 0        | 18885219 | 1000     | COG1009 | C | NADH:ubiquinone oxidoreductase subunit 5 (chain L)/Multisu      | K00341  | METABOLISM                         |
| PA1054 | shaA  | ShaA(Probable NADH dehydrogenase)                            | 0        | 18885219 | 1000     | COG1009 | C | NADH:ubiquinone oxidoreductase subunit 5 (chain L)/Multisu      | K05565  | METABOLISM                         |
| PA1054 | shaA  | ShaA(Probable NADH dehydrogenase)                            | 0        | 18885219 | 1000     | COG1211 | P | "Multisubunit Na <sup>+</sup> antiporter, MnhB subunit"         | K05566  | METABOLISM                         |
| PA1054 | shaA  | ShaA(Probable NADH dehydrogenase)                            | 0        | 18885219 | 1000     | COG1009 | P | NADH:ubiquinone oxidoreductase subunit 5 (chain L)/Multisu      | K05577  | METABOLISM                         |
| PA1054 | shaA  | ShaA(Probable NADH dehydrogenase)                            | 0        | 18885219 | 1000     | COG1009 | P | NADH:ubiquinone oxidoreductase subunit 5 (chain L)/Multisu      | K00341  | METABOLISM                         |
| PA1054 | shaA  | ShaA(Probable NADH dehydrogenase)                            | 0        | 18885219 | 1000     | COG1009 | C | NADH:ubiquinone oxidoreductase subunit 5 (chain L)/Multisu      | K05559  | METABOLISM                         |
| PA1064 |       | hypothetical protein                                         | 3.88E+08 | 2.22E+08 | 0.573276 | COG3650 | S | Predicted membrane protein                                      | K01989  | POORLY CHARACTERIZED               |
| PA1074 | bracC | branched-chain amino acid transport protein BracC            | 1.07E+09 | 5.51E+08 | 0.513928 | COG0683 | E | "ABC-type branched-chain amino acid transport systems, peri     | K01995  | METABOLISM                         |
| PA1076 |       | hypothetical protein                                         | 2.3E+09  | 2.74E+09 | 1.193768 |         |   |                                                                 |         |                                    |
| PA1086 | flgK  | Flagellar hook-associated protein 1 FlgK                     | 2.67E+08 | 0        | 0        | COG1256 | N | Flagellar hook-associated protein                               | K02396  | CELLULAR PROCESSES AND SIGNALING   |
| PA1087 | flgI  | flagellar hook-associated protein type 3 FlgI                | 68489365 | 17123427 | 0.250016 | COG1344 | N | Flagellin and related hook-associated proteins                  | K02406  | CELLULAR PROCESSES AND SIGNALING   |
| PA1087 | flgI  | flagellar hook-associated protein type 3 FlgI                | 68489365 | 17123427 | 0.250016 | COG1344 | N | Flagellin and related hook-associated proteins                  | K02397  | CELLULAR PROCESSES AND SIGNALING   |
| PA1092 | flfC  | flagellin type B                                             | 2.9E+09  | 2.03E+10 | 7.005868 | COG1344 | N | Flagellin and related hook-associated proteins                  | K02406  | CELLULAR PROCESSES AND SIGNALING   |
| PA1092 | flfC  | flagellin type B                                             | 2.9E+09  | 2.03E+10 | 7.005868 | COG1344 | N | Flagellin and related hook-associated proteins                  | K02397  | CELLULAR PROCESSES AND SIGNALING   |
| PA1094 | flfD  | Flagellar capping protein FlfD                               | 8.65E+08 | 1.12E+08 | 0.129389 | COG1345 | N | Flagellar capping protein                                       | K02407  | CELLULAR PROCESSES AND SIGNALING   |
| PA1096 |       | hypothetical protein                                         | 2.14E+08 | 0        | 0        |         |   |                                                                 |         |                                    |
| PA1097 | fleQ  | transcriptional regulator FleQ                               | 1.36E+08 | 28666369 | 0.210398 | CG02204 | T | "Response regulator containing CheY-like receiver, AAA-type     | K07712  | CELLULAR PROCESSES AND SIGNALING   |
| PA1097 | fleQ  | transcriptional regulator FleQ                               | 1.36E+08 | 28666369 | 0.210398 | CG02204 | T | "Response regulator containing CheY-like receiver, AAA-type     | K02481  | CELLULAR PROCESSES AND SIGNALING   |
| PA1097 | fleQ  | transcriptional regulator FleQ                               | 1.36E+08 | 28666369 | 0.210398 | CG02204 | T | "Response regulator containing CheY-like receiver, AAA-type     | K010126 | CELLULAR PROCESSES AND SIGNALING   |
| PA1101 | flfI  | Flagella M-ring outer membrane protein precursor             | 22290950 | 0        | 0        | COG1766 | N | Flagellar biosynthesis/type III secretory pathway lipoprotein   | K02409  | CELLULAR PROCESSES AND SIGNALING   |
| PA1101 | flfI  | Flagella M-ring outer membrane protein precursor             | 22290950 | 0        | 0        | COG1766 | N | Flagellar biosynthesis/type III secretory pathway lipoprotein   | K02409  | CELLULAR PROCESSES AND SIGNALING   |
| PA1103 |       | probable flagellar assembly protein                          | 6.47E+08 | 39800345 | 6.15E-02 | COG1317 | U | Flagellar biosynthesis/type III secretory pathway protein       | K03223  | CELLULAR PROCESSES AND SIGNALING   |
| PA1103 |       | probable flagellar assembly protein                          | 6.47E+08 | 39800345 | 6.15E-02 | COG1317 | U | Flagellar biosynthesis/type III secretory pathway protein       | K02411  | CELLULAR PROCESSES AND SIGNALING   |
| PA1103 |       | probable flagellar assembly protein                          | 6.47E+08 | 39800345 | 6.15E-02 | COG1317 | N | Flagellar biosynthesis/type III secretory pathway protein       | K03223  | CELLULAR PROCESSES AND SIGNALING   |
| PA1104 | flfI  | Flagellum-specific ATP synthase FlfI                         | 35239777 | 0        | 0        | COG1157 | U | Flagellar biosynthesis/type III secretory pathway ATPase        | K03224  | CELLULAR PROCESSES AND SIGNALING   |
| PA1104 | flfI  | Flagellum-specific ATP synthase FlfI                         | 35239777 | 0        | 0        | COG1157 | N | Flagellar biosynthesis/type III secretory pathway ATPase        | K03242  | CELLULAR PROCESSES AND SIGNALING   |
| PA1104 | flfI  | Flagellum-specific ATP synthase FlfI                         | 35239777 | 0        | 0        | COG1157 | U | Flagellar biosynthesis/type III secretory pathway ATPase        | K02412  | CELLULAR PROCESSES AND SIGNALING   |
| PA1104 | flfI  | Flagellum-specific ATP synthase FlfI                         | 35239777 | 0        | 0        | COG1157 | N | Flagellar biosynthesis/type III secretory pathway ATPase        | K03224  | CELLULAR PROCESSES AND SIGNALING   |
| PA1119 | yfifB | YfifB                                                        | 59742564 | 4.38E+08 | 7.33421  | COG2885 | M | Outer membrane protein and related peptidoglycan-associate      | K03640  | CELLULAR PROCESSES AND SIGNALING   |
| PA1119 | yfifB | YfifB                                                        | 59742564 | 4.38E+08 | 7.33421  | COG2885 | M | Outer membrane protein and related peptidoglycan-associate      | K03286  | CELLULAR PROCESSES AND SIGNALING   |
| PA1123 |       | hypothetical protein                                         | 2.31E+08 | 1.72E+08 | 0.745049 |         |   |                                                                 |         |                                    |
| PA1127 |       | probable oxidoreductase                                      | 99885150 | 62740281 | 0.628124 |         |   |                                                                 |         |                                    |
| PA1151 | imm2  | pyocin S2 immunity protein                                   | 1.45E+09 | 1.18E+09 | 0.818264 |         |   |                                                                 |         |                                    |
| PA1154 |       | conserved hypothetical protein                               | 0        | 2.48E+08 | 1000     | COG1943 | L | Transposase and inactivated derivatives                         | K07491  | INFORMATION STORAGE AND PROCESSING |
| PA1155 | nrdB  | "Nrdb                                                        | 6.22E+08 | 7.25E+08 | 1.165097 | COG0208 | F | "Ribonucleotide reductase, beta subunit"                        | K10808  | METABOLISM                         |
| PA1155 | nrdB  | "Nrdb                                                        | 6.22E+08 | 7.25E+08 | 1.165097 | COG0208 | F | "Ribonucleotide reductase, beta subunit"                        | K00526  | METABOLISM                         |
| PA1156 | nrda  | "Nrda                                                        | 3.07E+08 | 5.58E+08 | 1.814538 | COG0209 | F | "Ribonucleotide reductase, alpha subunit"                       | K00525  | METABOLISM                         |
| PA1159 |       | probable cold-shock protein                                  | 1.27E+10 | 1.46E+10 | 1.147181 | COG1278 | K | Cold shock proteins                                             | K03704  | INFORMATION STORAGE AND PROCESSING |
| PA1160 |       | hypothetical protein                                         | 17271686 | 0        | 0        |         |   |                                                                 |         |                                    |
| PA1163 | ndvB  | NdvB(encodes a glucosyltransferase enzyme that catalyzes the | 0        | 1.21E+08 | 1000     | COG1215 | M | "Glucosyltransferases, probably involved in cell wall biogenesi | K00694  | CELLULAR PROCESSES AND SIGNALING   |
| PA1163 | ndvB  | NdvB(encodes a glucosyltransferase enzyme that catalyzes the | 0        | 1.21E+08 | 1000     | COG1215 | M | "Glucosyltransferases, probably involved in cell wall biogenesi | K00720  | CELLULAR PROCESSES AND SIGNALING   |
| PA1163 | ndvB  | NdvB(encodes a glucosyltransferase enzyme that catalyzes the | 0        | 1.21E+08 | 1000     | COG5309 | G | "Exo-beta-1,3-glucanase"                                        | K01210  | METABOLISM                         |
| PA1178 | oprH  | OpvH/O and low Mg2+ inducible outer membrane protein H1 pre  | 0        | 2.34E+08 | 1000     | COG3337 | N | Opacity protein and related surface antigens                    | K11534  | CELLULAR PROCESSES AND SIGNALING   |
| PA1203 |       | hypothetical protein                                         | 2.18E+08 | 27366680 | 0.125694 | COG1765 | O | "Predicted redox protein, regulator of disulfide bond formatio  | K07397  | CELLULAR PROCESSES AND SIGNALING   |
| PA1203 |       | hypothetical protein                                         | 2.18E+08 | 27366680 | 0.125694 | COG1765 | O | "Predicted redox protein, regulator of disulfide bond formatio  | K06889  | CELLULAR PROCESSES AND SIGNALING   |
| PA1244 | qslA  | QslA                                                         | 3.04E+08 | 0        | 0        |         |   |                                                                 |         |                                    |
| PA1250 | apri  | alkaline proteinase inhibitor Apri                           | 63675483 | 30803831 | 0.483763 |         |   |                                                                 |         |                                    |
| PA1272 | cobO  | cob(I)alamin adenosyltransferase                             | 38197800 | 13715664 | 0.359069 | COG2109 | H | ATP:corrinoid adenosyltransferase                               | K00798  | METABOLISM                         |
| PA1295 |       | conserved hypothetical protein                               | 53598523 | 0        | 0        | COG3100 | S | Uncharacterized protein conserved in bacteria                   | K09902  | POORLY CHARACTERIZED               |
| PA1323 |       | hypothetical protein                                         | 4.48E+09 | 1.65E+09 | 0.367553 | COG4575 | S | Uncharacterized conserved protein                               | K05594  | POORLY CHARACTERIZED               |
| PA1324 |       | hypothetical protein                                         | 1.73E+08 | 1.63E+08 | 0.941313 |         |   |                                                                 |         |                                    |
| PA1337 | ansB  | glutaminase-asparaginase                                     | 94239729 | 2.37E+08 | 2.511435 | COG0252 | E | L-asparaginase/archaeal Glu-tRNA(Gln) amidotransferase subu     | K09482  | METABOLISM                         |
| PA1337 | ansB  | glutaminase-asparaginase                                     | 94239729 | 2.37E+08 | 2.511435 | COG0252 | J | L-asparaginase/archaeal Glu-tRNA(Gln) amidotransferase subu     | K09482  | INFORMATION STORAGE AND PROCESSING |
| PA1337 | ansB  | glutaminase-asparaginase                                     | 94239729 | 2.37E+08 | 2.511435 | COG0252 | E | L-asparaginase/archaeal Glu-tRNA(Gln) amidotransferase subu     | K01424  | METABOLISM                         |
| PA1337 | ansB  | glutaminase-asparaginase                                     | 94239729 | 2.37E+08 | 2.511435 | COG0252 | J | L-asparaginase/archaeal Glu-tRNA(Gln) amidotransferase subu     | K01424  | INFORMATION STORAGE AND PROCESSING |
| PA1338 | gst   | gamma-glutamyltranspeptidase precursor                       | 79643375 | 3.11E+08 | 3.907197 | COG0405 | E | Gamma-glutamyltransferase                                       | K00681  | METABOLISM                         |
| PA1342 | aatJ  | AatJ                                                         | 1.48E+09 | 4.44E+08 | 0.298788 | COG0834 | T | "ABC-type amino acid transport/signal transduction systems,     | K02030  | CELLULAR PROCESSES AND SIGNALING   |
| PA1342 | aatJ  | AatJ                                                         | 1.48E+09 | 4.44E+08 | 0.298788 | COG0834 | E | "ABC-type amino acid transport/signal transduction systems,     | K02030  | METABOLISM                         |
| PA1367 |       | hypothetical protein                                         | 0        | 24500279 | 1000     | COG0384 | R | "Predicted epimerase, PhxC/PhxH homolog"                        | K06998  | POORLY CHARACTERIZED               |
| PA1369 |       | hypothetical protein                                         | 1.87E+10 | 2.67E+10 | 1.428502 |         |   |                                                                 |         |                                    |
| PA1404 |       | hypothetical protein                                         | 2.29E+08 | 0        | 0        |         |   |                                                                 |         |                                    |
| PA1423 | bdIA  | BdIA                                                         | 36477344 | 7.2E+08  | 19.74484 | COG0840 | N | Methyl-accepting chemotaxis protein                             | K03406  | CELLULAR PROCESSES AND SIGNALING   |
| PA1423 | bdIA  | BdIA                                                         | 36477344 | 7.2E+08  | 19.74484 | COG0840 | N | Methyl-accepting chemotaxis protein                             | K03406  | CELLULAR PROCESSES AND SIGNALING   |
| PA1425 |       | probable ATP-binding component of ABC transporter            | 40766241 | 0        | 0        | COG0488 | R | ATPase components of ABC transporters with duplicated ATP:      | K06158  | POORLY CHARACTERIZED               |
| PA1429 |       | probable cation-transporting P-type ATPase                   | 0        | 36972336 | 1000     | COG0474 | P | Cation transport ATPase                                         | K01530  | METABOLISM                         |
| PA1429 |       | probable cation-transporting P-type ATPase                   | 0        | 36972336 | 1000     | COG0474 | P | Cation transport ATPase                                         | K01552  | METABOLISM                         |
| PA1429 |       | probable cation-transporting P-type ATPase                   | 0        | 36972336 | 1000     | COG0474 | P | Cation transport ATPase                                         | K01537  | METABOLISM                         |
| PA1430 | lasR  | transcriptional regulator LasR                               | 19605966 | 6176439  | 0.315029 | COG2771 | K | DNA-binding HTH domain-containing proteins                      | K07782  | INFORMATION STORAGE AND PROCESSING |
| PA1445 | flfO  | flagellar protein FlfO                                       | 1.04E+08 | 0        | 0        | COG3190 | N | Flagellar biogenesis protein                                    | K02418  | CELLULAR PROCESSES AND SIGNALING   |
| PA1456 | cheY  | two-component response regulator CheY                        | 2.15E+08 | 2.64E+08 | 1.224633 | COG0745 | T | Response regulators consisting of a CheY-like receiver domain   | K02483  | CELLULAR PROCESSES AND SIGNALING   |
| PA1456 | cheY  | two-component response regulator CheY                        | 2.15E+08 | 2.64E+08 | 1.224633 | COG0745 | K | Response regulators consisting of a CheY-like receiver domain   | K02483  | INFORMATION STORAGE AND PROCESSING |
| PA1457 | cheZ  | chemotaxis protein CheZ                                      | 1.16E+09 | 4.63E+08 | 0.397888 | COG3143 | N | Chemotaxis protein                                              | K03414  | CELLULAR PROCESSES AND SIGNALING   |
| PA1457 | cheZ  | chemotaxis protein CheZ                                      | 1.16E+09 | 4.63E+08 | 0.397888 | COG3143 | T | Chemotaxis protein                                              | K03414  | CELLULAR PROCESSES AND SIGNALING   |
| PA1457 | cheZ  | chemotaxis protein CheZ                                      | 1.16E+09 | 4.63E+08 | 0.397888 |         |   |                                                                 |         |                                    |

|        |       |                                                                |          |          |          |          |         |                                                                   |                                                                   |                                    |                                  |
|--------|-------|----------------------------------------------------------------|----------|----------|----------|----------|---------|-------------------------------------------------------------------|-------------------------------------------------------------------|------------------------------------|----------------------------------|
| PA1458 |       | probable two-component sensor                                  | 74821539 | 81713567 | 1.092113 | COG0643  | N       | Chemotaxis protein histidine kinase and related kinases           | K02487                                                            | CELLULAR PROCESSES AND SIGNALING   |                                  |
| PA1465 |       | hypothetical protein                                           |          | 1.1E+08  | 0        |          |         |                                                                   |                                                                   |                                    |                                  |
| PA1479 | cmcE  | cytochrome C-type biogenesis protein CmcE                      |          | 1E+09    | 5.32E+08 | 0.530313 | COG2332 | O                                                                 | Cytochrome c-type biogenesis protein CmcE                         | K02197                             | CELLULAR PROCESSES AND SIGNALING |
| PA1482 | cmcH  | cytochrome C-type biogenesis protein CmcH                      | 54848781 | 86542892 | 1.577845 | COG3088  | O       | Uncharacterized protein involved in biosynthesis of c-type cyt    | K04017                                                            | CELLULAR PROCESSES AND SIGNALING   |                                  |
| PA1482 | cmcH  | cytochrome C-type biogenesis protein CmcH                      | 54848781 | 86542892 | 1.577845 | COG3088  | O       | Uncharacterized protein involved in biosynthesis of c-type cyt    | K02200                                                            | CELLULAR PROCESSES AND SIGNALING   |                                  |
| PA1483 | cycH  | cytochrome c-type biogenesis protein                           | 58893060 | 48525560 | 0.823961 | COG4235  | O       | Cytochrome c biogenesis factor                                    | K04018                                                            | CELLULAR PROCESSES AND SIGNALING   |                                  |
| PA1483 | cycP  | cytochrome c-type biogenesis protein                           | 58893060 | 48525560 | 0.823961 | COG4235  | O       | Cytochrome c biogenesis factor                                    | K02200                                                            | CELLULAR PROCESSES AND SIGNALING   |                                  |
| PA1493 | cysP  | sulfate-binding protein of ABC transporter                     | 29251516 |          | 0        | COG1613  | P       | "ABC-type sulfate transport system, periplasmic component"        | K02048                                                            | METABOLISM                         |                                  |
| PA1494 | muIA  | mucoidy inhibitor gene A                                       |          |          | 0        | 12943532 |         |                                                                   |                                                                   |                                    |                                  |
| PA1516 |       | hypothetical protein                                           | 36440611 | 1.03E+08 | 2.838832 | COG3195  | S       | Uncharacterized protein conserved in bacteria                     | K06016                                                            | POORLY CHARACTERIZED               |                                  |
| PA1516 |       | hypothetical protein                                           | 36440611 | 1.03E+08 | 2.838832 | COG3195  | S       | Uncharacterized protein conserved in bacteria                     | K13485                                                            | POORLY CHARACTERIZED               |                                  |
| PA1528 | zipA  | cell division protein ZipA                                     | 2.09E+09 | 2.21E+08 | 0.105689 | COG3115  | D       | Cell division protein                                             | K03528                                                            | CELLULAR PROCESSES AND SIGNALING   |                                  |
| PA1532 | dnaX  | DNA polymerase subunits gamma and tau                          | 77887795 | 55288152 | 0.709844 | COG2812  | L       | "DNA polymerase III, gamma/tau subunits"                          | K02343                                                            | INFORMATION STORAGE AND PROCESSING |                                  |
| PA1532 | dnaX  | DNA polymerase subunits gamma and tau                          | 77887795 | 55288152 | 0.709844 | COG2812  | L       | "DNA polymerase III, gamma/tau subunits"                          | K02341                                                            | INFORMATION STORAGE AND PROCESSING |                                  |
| PA1533 |       | conserved hypothetical protein                                 | 1.57E+08 | 4.84E+08 | 3.089335 | COG0718  | S       | Uncharacterized protein conserved in bacteria                     | K09747                                                            | POORLY CHARACTERIZED               |                                  |
| PA1550 |       | hypothetical protein                                           | 4.11E+08 | 5.15E+08 | 1.252029 | COG3198  | S       | Uncharacterized protein conserved in bacteria                     | K09926                                                            | POORLY CHARACTERIZED               |                                  |
| PA1551 |       | probable ferredoxin                                            | 2.01E+08 | 27155753 | 0.134804 | COG0348  | C       | Polyferredoxin                                                    | K02574                                                            | METABOLISM                         |                                  |
| PA1552 | ccoP1 | "Cytochrome c oxidase                                          | 1.16E+08 | 3.92E+08 | 3.365611 | COG2010  | C       | "Cytochrome c, mono- and diheme variants"                         | K02275                                                            | METABOLISM                         |                                  |
| PA1552 | ccoP1 | "Cytochrome c oxidase                                          | 1.16E+08 | 3.92E+08 | 3.365611 | COG2010  | C       | "Cytochrome c, mono- and diheme variants"                         | K02275                                                            | METABOLISM                         |                                  |
| PA1552 | ccoP1 | "Cytochrome c oxidase                                          | 1.16E+08 | 3.92E+08 | 3.365611 | COG2010  | C       | "Cytochrome c, mono- and diheme variants"                         | K02275                                                            | METABOLISM                         |                                  |
| PA1552 | ccoP1 | "Cytochrome c oxidase                                          | 1.16E+08 | 3.92E+08 | 3.365611 | COG2010  | C       | "Cytochrome c, mono- and diheme variants"                         | K02275                                                            | METABOLISM                         |                                  |
| PA1553 | ccoO1 | "Cytochrome c oxidase                                          | 9.4E+08  | 7E+08    | 0.744461 | COG2993  | C       | "Cbb3-type cytochrome oxidase, cytochrome c subunit"              | K00405                                                            | METABOLISM                         |                                  |
| PA1555 | ccoP2 | "Cytochrome c oxidase                                          | 41132765 | 1.39E+08 | 3.379298 | COG2010  | C       | "Cytochrome c, mono- and diheme variants"                         | K02275                                                            | METABOLISM                         |                                  |
| PA1555 | ccoP2 | "Cytochrome c oxidase                                          | 41132765 | 1.39E+08 | 3.379298 | COG2010  | C       | "Cytochrome c, mono- and diheme variants"                         | K02275                                                            | METABOLISM                         |                                  |
| PA1555 | ccoP2 | "Cytochrome c oxidase                                          | 41132765 | 1.39E+08 | 3.379298 | COG2010  | C       | "Cytochrome c, mono- and diheme variants"                         | K02275                                                            | METABOLISM                         |                                  |
| PA1555 | ccoP2 | "Cytochrome c oxidase                                          | 41132765 | 1.39E+08 | 3.379298 | COG2010  | C       | "Cytochrome c, mono- and diheme variants"                         | K02275                                                            | METABOLISM                         |                                  |
| PA1556 | ccoO2 | "Cytochrome c oxidase                                          | 6.35E+08 | 4.44E+08 | 0.699727 | COG2993  | C       | "Cbb3-type cytochrome oxidase, cytochrome c subunit"              | K00405                                                            | METABOLISM                         |                                  |
| PA1561 | aer   | aerotaxis receptor Aer                                         | 2.32E+08 | 1.13E+09 | 4.861806 | COG0840  | T       | Methyl-accepting chemotaxis protein                               | K03406                                                            | CELLULAR PROCESSES AND SIGNALING   |                                  |
| PA1561 | aer   | aerotaxis receptor Aer                                         | 2.32E+08 | 1.13E+09 | 4.861806 | COG0840  | N       | Methyl-accepting chemotaxis protein                               | K03406                                                            | CELLULAR PROCESSES AND SIGNALING   |                                  |
| PA1562 | acnA  | aconitate hydratase 1                                          | 9887754  |          | 0        | COG1048  | C       | Aconitase A                                                       | K01681                                                            | METABOLISM                         |                                  |
| PA1571 |       | hypothetical protein                                           |          | 0        | 25465331 |          |         |                                                                   |                                                                   |                                    |                                  |
| PA1579 |       | hypothetical protein                                           | 32430204 |          | 0        |          |         |                                                                   |                                                                   |                                    |                                  |
| PA1580 | glfA  | citrate synthase                                               |          | 0        | 1.16E+08 | 1000     | COG0372 | C                                                                 | Citrate synthase                                                  | K01659                             | METABOLISM                       |
| PA1580 | glfA  | citrate synthase                                               |          | 0        | 1.16E+08 | 1000     | COG0372 | C                                                                 | Citrate synthase                                                  | K01647                             | METABOLISM                       |
| PA1583 | sdhA  | succinate dehydrogenase (A subunit)                            | 4E+08    | 6.07E+08 | 1.518347 | COG1053  | C       | "Succinate dehydrogenase/fumarate reductase, flavoprotein: K00239 | K00239                                                            | METABOLISM                         |                                  |
| PA1583 | sdhA  | succinate dehydrogenase (A subunit)                            | 4E+08    | 6.07E+08 | 1.518347 | COG1053  | C       | "Succinate dehydrogenase/fumarate reductase, flavoprotein: K00244 | K00244                                                            | METABOLISM                         |                                  |
| PA1584 | sdhB  | succinate dehydrogenase (B subunit)                            |          | 0        | 87457358 | 1000     | COG0479 | C                                                                 | "Succinate dehydrogenase/fumarate reductase, Fe-S protein: K00245 | K00245                             | METABOLISM                       |
| PA1584 | sdhC  | succinate dehydrogenase (B subunit)                            |          | 0        | 87457358 | 1000     | COG0479 | C                                                                 | "Succinate dehydrogenase/fumarate reductase, Fe-S protein: K00246 | K00246                             | METABOLISM                       |
| PA1585 | sucA  | 2-oxoglutarate dehydrogenase (E1 subunit)                      | 83629561 | 67210987 | 0.803675 | COG0567  | C       | "2-oxoglutarate dehydrogenase complex, dehydrogenase (E1) K00164  | K00164                                                            | METABOLISM                         |                                  |
| PA1585 | sucA  | 2-oxoglutarate dehydrogenase (E1 subunit)                      | 83629561 | 67210987 | 0.803675 | COG0567  | C       | "2-oxoglutarate dehydrogenase complex, dehydrogenase (E1) K00164  | K00164                                                            | METABOLISM                         |                                  |
| PA1586 | sucB  | dihydropyruvate dehydrogenase (E2 subunit)                     | 7.19E+08 | 1.52E+09 | 2.110144 | COG0508  | C       | "Pyruvate/2-oxoglutarate dehydrogenase complex, dihydrolip K00627 | K00627                                                            | METABOLISM                         |                                  |
| PA1586 | sucB  | dihydropyruvate dehydrogenase (E2 subunit)                     | 7.19E+08 | 1.52E+09 | 2.110144 | COG0508  | C       | "Pyruvate/2-oxoglutarate dehydrogenase complex, dihydrolip K00628 | K00628                                                            | METABOLISM                         |                                  |
| PA1586 | sucB  | dihydropyruvate dehydrogenase (E2 subunit)                     | 7.19E+08 | 1.52E+09 | 2.110144 | COG0508  | C       | "Pyruvate/2-oxoglutarate dehydrogenase complex, dihydrolip K00699 | K00699                                                            | METABOLISM                         |                                  |
| PA1587 | lpd   | dihydropyruvate dehydrogenase Lpd                              | 2.63E+08 | 1.65E+09 | 6.281281 | COG1249  | C       | "Pyruvate/2-oxoglutarate dehydrogenase complex, dihydrolip K00520 | K00520                                                            | METABOLISM                         |                                  |
| PA1587 | lpd   | dihydropyruvate dehydrogenase Lpd                              | 2.63E+08 | 1.65E+09 | 6.281281 | COG1249  | C       | "Pyruvate/2-oxoglutarate dehydrogenase complex, dihydrolip K00383 | K00383                                                            | METABOLISM                         |                                  |
| PA1587 | lpd   | dihydropyruvate dehydrogenase Lpd                              | 2.63E+08 | 1.65E+09 | 6.281281 | COG1249  | C       | "Pyruvate/2-oxoglutarate dehydrogenase complex, dihydrolip K00322 | K00322                                                            | METABOLISM                         |                                  |
| PA1587 | lpd   | dihydropyruvate dehydrogenase Lpd                              | 2.63E+08 | 1.65E+09 | 6.281281 | COG1249  | C       | "Pyruvate/2-oxoglutarate dehydrogenase complex, dihydrolip K00382 | K00382                                                            | METABOLISM                         |                                  |
| PA1588 | sucC  | succinyl-CoA synthetase beta chain                             | 8.36E+08 | 6.28E+09 | 7.517167 | COG0045  | C       | "Succinyl-CoA synthetase, beta subunit"                           | K01903                                                            | METABOLISM                         |                                  |
| PA1588 | sucC  | succinyl-CoA synthetase beta chain                             | 8.36E+08 | 6.28E+09 | 7.517167 | COG0045  | C       | "Succinyl-CoA synthetase, beta subunit"                           | K01900                                                            | METABOLISM                         |                                  |
| PA1589 | sucD  | succinyl-CoA synthetase alpha chain                            | 1.62E+09 | 4.18E+09 | 2.584875 | COG0074  | C       | "Succinyl-CoA synthetase, alpha subunit"                          | K01902                                                            | METABOLISM                         |                                  |
| PA1596 | htpG  | heat shock protein HtpG                                        | 3.96E+08 | 5.93E+08 | 1.496488 | COG0326  | O       | "Molecular chaperone, HSP90 family"                               | K04079                                                            | CELLULAR PROCESSES AND SIGNALING   |                                  |
| PA1601 |       | probable aldehyde dehydrogenase                                | 13161359 | 1.57E+08 | 11.96061 | COG1529  | C       | "Aerobic-type carbon monoxide dehydrogenase, large subunit K11177 | K11177                                                            | METABOLISM                         |                                  |
| PA1601 |       | probable aldehyde dehydrogenase                                | 13161359 | 1.57E+08 | 11.96061 | COG1529  | C       | "Aerobic-type carbon monoxide dehydrogenase, large subunit K07303 | K07303                                                            | METABOLISM                         |                                  |
| PA1601 |       | probable aldehyde dehydrogenase                                | 13161359 | 1.57E+08 | 11.96061 | COG1529  | C       | "Aerobic-type carbon monoxide dehydrogenase, large subunit K03520 | K03520                                                            | METABOLISM                         |                                  |
| PA1608 |       | probable chemotaxis transducer                                 |          | 0        | 6.58E+08 | 1000     | COG0840 | N                                                                 | Methyl-accepting chemotaxis protein                               | K03406                             | CELLULAR PROCESSES AND SIGNALING |
| PA1608 |       | probable chemotaxis transducer                                 |          | 0        | 6.58E+08 | 1000     | COG0840 | N                                                                 | Methyl-accepting chemotaxis protein                               | K03406                             | CELLULAR PROCESSES AND SIGNALING |
| PA1609 | fabB  | beta-ketoacyl-ACP synthase I                                   | 10966235 | 82808848 | 7.551256 | COG0304  | I       | 3-oxoacyl-(acyl-carrier-protein) synthase                         | K00647                                                            | METABOLISM                         |                                  |
| PA1609 | fabB  | beta-ketoacyl-ACP synthase I                                   | 10966235 | 82808848 | 7.551256 | COG0304  | I       | 3-oxoacyl-(acyl-carrier-protein) synthase                         | K00647                                                            | METABOLISM                         |                                  |
| PA1609 | fabB  | beta-ketoacyl-ACP synthase I                                   | 10966235 | 82808848 | 7.551256 | COG0304  | Q       | 3-oxoacyl-(acyl-carrier-protein) synthase                         | K09458                                                            | METABOLISM                         |                                  |
| PA1609 | fabB  | beta-ketoacyl-ACP synthase I                                   | 10966235 | 82808848 | 7.551256 | COG0304  | Q       | 3-oxoacyl-(acyl-carrier-protein) synthase                         | K00647                                                            | METABOLISM                         |                                  |
| PA1615 |       | probable lipase                                                |          | 4.3E+08  | 3.34E+08 | 0.777904 |         |                                                                   |                                                                   |                                    |                                  |
| PA1641 |       | hypothetical protein                                           | 22639600 |          | 0        |          |         |                                                                   |                                                                   |                                    |                                  |
| PA1646 |       | probable chemotaxis transducer                                 | 36477344 | 7.2E+08  | 19.74484 | COG0840  | T       | Methyl-accepting chemotaxis protein                               | K03406                                                            | CELLULAR PROCESSES AND SIGNALING   |                                  |
| PA1646 |       | probable chemotaxis transducer                                 | 36477344 | 7.2E+08  | 19.74484 | COG0840  | N       | Methyl-accepting chemotaxis protein                               | K03406                                                            | CELLULAR PROCESSES AND SIGNALING   |                                  |
| PA1657 | hsiB2 | HsiB2                                                          | 1.21E+08 |          | 0        | COG3516  | S       | Uncharacterized protein conserved in bacteria                     | K11901                                                            | POORLY CHARACTERIZED               |                                  |
| PA1707 | pcrH  | regulatory protein PcrH                                        |          | 0        | 1.73E+08 | 1000     |         |                                                                   |                                                                   |                                    |                                  |
| PA1708 | popB  | translocator protein PopB                                      | 8807933  |          | 0        |          |         |                                                                   |                                                                   |                                    |                                  |
| PA1709 | popD  | Translocator outer membrane protein PopD precursor             |          | 0        | 62768134 | 1000     |         |                                                                   |                                                                   |                                    |                                  |
| PA1746 |       | hypothetical protein                                           | 1.13E+09 | 1.08E+09 | 0.949674 |          |         |                                                                   |                                                                   |                                    |                                  |
| PA1749 |       | hypothetical protein                                           | 6.16E+08 | 4.26E+08 | 0.69172  | COG2388  | R       | Predicted acetyltransferase                                       | K06975                                                            | POORLY CHARACTERIZED               |                                  |
| PA1750 |       | phospho-2-dehydro-3-deoxyheptonate aldolase                    | 72586107 |          | 0        | COG0722  | E       | 3-deoxy-D-arabino-heptulosonate 7-phosphate (DAHP) synth          | K01626                                                            | METABOLISM                         |                                  |
| PA1754 | cysB  | transcriptional regulator CysB                                 | 28770771 |          | 0        |          |         |                                                                   |                                                                   |                                    |                                  |
| PA1770 | ppsA  | phosphoenolpyruvate synthase                                   | 1.87E+08 | 1.15E+09 | 6.147403 | COG0574  | G       | Phosphoenolpyruvate synthase/pyruvate phosphate dikinase          | K01007                                                            | METABOLISM                         |                                  |
| PA1770 | ppsA  | phosphoenolpyruvate synthase                                   | 1.87E+08 | 1.15E+09 | 6.147403 | COG1080  | G       | Phosphoenolpyruvate-protein kinase (PTS system E) compo           | K08483                                                            | METABOLISM                         |                                  |
| PA1770 | ppsA  | phosphoenolpyruvate synthase                                   | 1.87E+08 | 1.15E+09 | 6.147403 | COG0574  | G       | Phosphoenolpyruvate synthase/pyruvate phosphate dikinase          | K01007                                                            | METABOLISM                         |                                  |
| PA1770 | ppsA  | phosphoenolpyruvate synthase                                   | 1.87E+08 | 1.15E+09 | 6.147403 | COG1080  | G       | Phosphoenolpyruvate-protein kinase (PTS system E) compo           | K02768                                                            | METABOLISM                         |                                  |
| PA1770 | ppsA  | phosphoenolpyruvate synthase                                   | 1.87E+08 | 1.15E+09 | 6.147403 | COG1080  | G       | Phosphoenolpyruvate-protein kinase (PTS system E) compo           | K11201                                                            | METABOLISM                         |                                  |
| PA1770 | ppsA  | phosphoenolpyruvate synthase                                   | 1.87E+08 | 1.15E+09 | 6.147403 | COG1080  | G       | Phosphoenolpyruvate-protein kinase (PTS system E) compo           | K11813                                                            | METABOLISM                         |                                  |
| PA1770 | ppsA  | phosphoenolpyruvate synthase                                   | 1.87E+08 | 1.15E+09 | 6.147403 | COG1080  | G       | Phosphoenolpyruvate-protein kinase (PTS system E) compo           | K1189                                                             | METABOLISM                         |                                  |
| PA1772 |       | probable methyltransferase                                     | 3.16E+08 | 6.62E+08 | 2.093863 | COG0684  | H       | Demethylmenaquinone methyltransferase                             | K02553                                                            | METABOLISM                         |                                  |
| PA1777 | oprF  | Major porin and structural outer membrane porin OprF precursor | 7.39E+10 | 1.04E+11 | 1.409752 | COG2885  | M       | Outer membrane protein and related peptidoglycan-associate        | K03286                                                            | CELLULAR PROCESSES AND SIGNALING   |                                  |
| PA1777 | oprF  | Major porin and structural outer membrane porin OprF precursor | 7.39E+10 | 1.04E+11 | 1.409752 | COG3047  | M       | Outer membrane protein W                                          | K07275                                                            | CELLULAR PROCESSES AND SIGNALING   |                                  |
| PA1777 | oprF  | Major porin and structural outer membrane porin OprF precursor | 7.39E+10 | 1.04E+11 | 1.409752 | COG2885  | M       | Outer membrane protein and related peptidoglycan-associate        | K03640                                                            | CELLULAR PROCESSES AND SIGNALING   |                                  |
| PA1787 | acnB  | aconitate hydratase 2                                          | 1.46E+09 | 1.8E+09  | 1.232215 | COG1049  | C       | Aconitase B                                                       | K01682                                                            | METABOLISM                         |                                  |
| PA1793 | ppiB  | peptidyl-prolyl cis-trans isomerase B                          | 1.25E+10 | 1.33E+10 | 1.067032 | COG0652  | O       | Peptidyl-prolyl cis-trans isomerase (rotamase) - cyclophilin      | K03067                                                            | CELLULAR PROCESSES AND SIGNALING   |                                  |
| PA1793 | ppiB  | peptidyl-prolyl cis-trans isomerase B                          | 1.25E+10 | 1.33E+10 | 1.067032 | COG0652  | O       | Peptidyl-prolyl cis-trans isomerase (rotamase) - cyclophilin      | K01872                                                            | CELLULAR PROCESSES AND SIGNALING   |                                  |
| PA1793 | ppiB  | peptidyl-prolyl cis-trans isomerase B                          | 1.25E+10 | 1.33E+10 | 1.067032 | COG0652  | O       | Peptidyl-prolyl cis-trans isomerase (rotamase) - cyclophilin      | K03768                                                            | CELLULAR PROCESSES AND SIGNALING   |                                  |
| PA1800 | tig   | trigger factor                                                 | 1.07E+10 | 8.65E+09 | 0.810073 | COG0544  | O       | FKBP-type peptidyl-prolyl cis-trans isomerase (trigger factor)    | K03545                                                            | CELLULAR PROCESSES AND SIGNALING   |                                  |
| PA1801 | clpP  | ClpP                                                           | 2.75E+08 | 1.01E+09 | 3.670035 | COG0740  | O       | Protease subunit of ATP-dependent Clp proteases                   | K01358                                                            | CELLULAR PROCESSES AND SIGNALING   |                                  |
| PA1801 | clpP  | ClpP                                                           | 2.75E+08 | 1.01E+09 | 3.670035 | COG0740  | O       | Protease subunit of ATP-dependent Clp proteases                   | K01358                                                            | CELLULAR PROCESSES AND SIGNALING   |                                  |
| PA1802 | clpX  | ClpX                                                           | 1.61E+10 | 1.1E+09  | 6.82E-02 | COG1219  | O       | "ATP-dependent protease Clp, ATPase subunit"                      | K03544                                                            | CELLULAR PROCESSES AND SIGNALING   |                                  |
| PA1803 | lon   | Lon protease                                                   | 48701880 | 1.01E+08 | 2.082254 | COG0466  | O       | "ATP-dependent Lon protease, bacterial type"                      | K01338                                                            | CELLULAR PROCESSES AND SIGNALING   |                                  |
| PA1804 | hupB  | DNA-binding protein HU                                         | 2.71E+09 | 1.02E+10 | 3.764223 | COG0776  | L       | Bacterial nucleoid DNA-binding protein                            | K03530                                                            | INFORMATION STORAGE AND PROCESSING |                                  |
| PA1804 | hupB  | DNA-binding protein HU                                         | 2.71E+09 | 1.02E+10 | 3.764223 | COG0776  | L       | Bacterial nucleoid DNA-binding protein                            | K05787                                                            | INFORMATION STORAGE AND PROCESSING |                                  |
| PA1804 | hupB  | DNA-binding protein HU                                         | 2.71E+09 | 1.02E+10 | 3.764223 | COG0776  | L       | Bacterial nucleoid DNA-binding protein                            | K04764                                                            | INFORMATION STORAGE AND PROCESSING |                                  |
| PA1804 | hupB  | DNA-binding protein HU                                         | 2.71E+09 | 1.02E+10 | 3.764223 | COG0776  | L       | Bacterial nucleoid DNA-binding protein                            | K05788                                                            | INFORMATION STORAGE AND PROCESSING |                                  |
| PA1805 | ppiD  | peptidyl-prolyl cis-trans isomerase D                          | 5.52E+09 | 1.93E+09 | 0.35066  | COG0760  | O       | Parvulin-like peptidyl-prolyl isomerase                           | K03771                                                            | CELLULAR PROCESSES AND SIGNALING   |                                  |
| PA1805 | ppiD  | peptidyl-prolyl cis-trans isomerase D                          | 5.52E+09 | 1.93E+09 | 0.35066  | COG0760  | O       | Parvulin-like peptidyl-prolyl isomerase                           | K03770                                                            | CELLULAR PROCESSES AND SIGNALING   |                                  |
| PA1805 | ppiD  | peptidyl-prolyl cis-trans isomerase D                          | 5.52E+09 | 1.93E+09 | 0.35066  | COG0760  | O       | Parvulin-like peptidyl-prolyl isomerase                           | K07533                                                            | CELLULAR PROCESSES AND SIGNALING   |                                  |
| PA1805 | ppiD  | peptidyl-prolyl cis-trans isomerase D                          | 5.52E+09 | 1.93E+09 | 0.35066  | COG0760  | O       | Parvulin-like peptidyl-prolyl isomerase                           | K03769                                                            | CELLULAR PROCESSES AND SIGNALING   |                                  |

|        |                                                                    |          |          |          |         |   |                                                                       |        |                                    |
|--------|--------------------------------------------------------------------|----------|----------|----------|---------|---|-----------------------------------------------------------------------|--------|------------------------------------|
| PA1926 | Uncharacterized protein                                            | 0        | 59766234 | 1000     | COG1944 | S | Uncharacterized conserved protein                                     | K09136 | POORLY CHARACTERIZED               |
| PA1930 | probable chemotaxis transducer                                     | 0        | 6.58E+08 | 1000     | COG0840 | N | Methyl-accepting chemotaxis protein                                   | K03406 | CELLULAR PROCESSES AND SIGNALING   |
| PA1930 | probable chemotaxis transducer                                     | 0        | 6.58E+08 | 1000     | COG2202 | T | FOG: PAS/PAC domain                                                   | K00936 | CELLULAR PROCESSES AND SIGNALING   |
| PA1930 | probable chemotaxis transducer                                     | 0        | 6.58E+08 | 1000     | COG0840 | T | Methyl-accepting chemotaxis protein                                   | K03406 | CELLULAR PROCESSES AND SIGNALING   |
| PA1969 | hypothetical protein                                               | 4.2E+09  | 3.77E+09 | 0.896596 |         |   |                                                                       |        |                                    |
| PA2021 | hypothetical protein                                               | 4.27E+09 | 9.34E+08 | 2.189186 |         |   |                                                                       |        |                                    |
| PA2071 | fusA2 elongation factor G                                          | 88381954 | 1.21E+08 | 1.367377 | COG0480 | J | Translation elongation factors (GTPases)                              | K02355 | INFORMATION STORAGE AND PROCESSING |
| PA2071 | fusA2 elongation factor G                                          | 88381954 | 1.21E+08 | 1.367377 | COG0480 | J | Translation elongation factors (GTPases)                              | K02355 | INFORMATION STORAGE AND PROCESSING |
| PA2081 | lynB *kynurenine formamidase                                       | 66069375 | 1.31E+08 | 1.982797 | COG1878 | R | Predicted metal-dependent hydrolase                                   | K07130 | POORLY CHARACTERIZED               |
| PA2126 | cgrC *cuaA gene regulator C                                        | 0        | 36990331 | 1000     | COG1475 | K | Predicted transcriptional regulators                                  | K03497 | INFORMATION STORAGE AND PROCESSING |
| PA2169 | hypothetical protein                                               | 4.51E+08 | 3.46E+08 | 0.76812  |         |   |                                                                       |        |                                    |
| PA2190 | conserved hypothetical protein                                     | 21807882 | 0        | 0        | COG3729 | R | General stress protein                                                | K06884 | POORLY CHARACTERIZED               |
| PA2193 | hcnA hydrogen cyanide synthase HcnA                                | 12248757 | 0        | 0        | COG3383 | R | Uncharacterized anaerobic dehydrogenase                               | K00336 | POORLY CHARACTERIZED               |
| PA2193 | hcnA hydrogen cyanide synthase HcnA                                | 12248757 | 0        | 0        | COG3383 | R | Uncharacterized anaerobic dehydrogenase                               | K00123 | POORLY CHARACTERIZED               |
| PA2247 | bkdA1 2-oxoisovalerate dehydrogenase (alpha subunit)               | 20778110 | 0        | 0        | COG1071 | C | "Pyruvate/2-oxoglutarate dehydrogenase complex, dehydrogK11381        |        | METABOLISM                         |
| PA2247 | bkdA1 2-oxoisovalerate dehydrogenase (alpha subunit)               | 20778110 | 0        | 0        | COG1071 | C | "Pyruvate/2-oxoglutarate dehydrogenase complex, dehydrogK11381        |        | METABOLISM                         |
| PA2247 | bkdA1 2-oxoisovalerate dehydrogenase (alpha subunit)               | 20778110 | 0        | 0        | COG1071 | C | "Pyruvate/2-oxoglutarate dehydrogenase complex, dehydrogK11381        |        | METABOLISM                         |
| PA2249 | bkdB branched-chain alpha-keto acid dehydrogenase (lipoamide compo | 0        | 1.08E+08 | 1000     | COG0508 | C | "Pyruvate/2-oxoglutarate dehydrogenase complex, dihydrolipK09699      |        | METABOLISM                         |
| PA2249 | bkdB branched-chain alpha-keto acid dehydrogenase (lipoamide compo | 0        | 1.08E+08 | 1000     | COG0508 | C | "Pyruvate/2-oxoglutarate dehydrogenase complex, dihydrolipK09699      |        | METABOLISM                         |
| PA2249 | bkdB branched-chain alpha-keto acid dehydrogenase (lipoamide compo | 0        | 1.08E+08 | 1000     | COG0508 | C | "Pyruvate/2-oxoglutarate dehydrogenase complex, dihydrolipK09699      |        | METABOLISM                         |
| PA2264 | conserved hypothetical protein                                     | 59696268 | 77740593 | 1.302269 |         |   |                                                                       |        |                                    |
| PA2291 | probable glucose-sensitive porin                                   | 0        | 1.07E+08 | 1000     | COG3659 | M | Carbohydrate-selective porin                                          | K07267 | CELLULAR PROCESSES AND SIGNALING   |
| PA2331 | hypothetical protein                                               | 2.97E+09 | 1.78E+09 | 0.598278 | COG2128 | S | Uncharacterized conserved protein                                     | K04756 | POORLY CHARACTERIZED               |
| PA2349 | conserved hypothetical protein                                     | 20675151 | 0        | 0        | COG1464 | P | "ABC-type metal ion transport system, periplasmic componenK02073      |        | METABOLISM                         |
| PA2381 | hypothetical protein                                               | 25514147 | 0        | 0        |         |   |                                                                       |        |                                    |
| PA2385 | pvdQ 3-oxo-C12-homoserine lactone acylase PvdQ                     | 13898608 | 3.38E+08 | 24.32869 | COG2366 | R | Protein related to penicillin acylase                                 | K01434 | POORLY CHARACTERIZED               |
| PA2385 | pvdQ 3-oxo-C12-homoserine lactone acylase PvdQ                     | 13898608 | 3.38E+08 | 24.32869 | COG2366 | R | Protein related to penicillin acylase                                 | K07116 | POORLY CHARACTERIZED               |
| PA2392 | pvdP PvdP                                                          | 94354307 | 0        | 0        |         |   |                                                                       |        |                                    |
| PA2393 | putative dipeptidase                                               | 59609396 | 4.66E+08 | 7.822192 | COG2355 | E | "Zn-dependent dipeptidase, microsomal dipeptidase homologK01273       |        | METABOLISM                         |
| PA2395 | pvdO PvdO                                                          | 3.09E+08 | 6.87E+08 | 2.221798 |         |   |                                                                       |        |                                    |
| PA2396 | pvdF pyoverdine synthetase F                                       | 3.51E+08 | 3.69E+08 | 1.051129 | COG0299 | F | Folate-dependent phosphoribosylglycinamide formyltransferaK11175      |        | METABOLISM                         |
| PA2398 | fpvA ferripyoverdine receptor                                      | 0        | 14532376 | 1000     | COG4773 | P | Outer membrane receptor for ferric coprogen and ferric-rhod K02014    |        | METABOLISM                         |
| PA2410 | fpvF PvpF                                                          | 2.77E+08 | 91002457 | 0.328639 | COG0803 | P | "ABC-type metal ion transport system, periplasmic componenK09818      |        | METABOLISM                         |
| PA2410 | fpvF PvpF                                                          | 2.77E+08 | 91002457 | 0.328639 | COG0803 | P | "ABC-type metal ion transport system, periplasmic componenK09818      |        | METABOLISM                         |
| PA2410 | fpvF PvpF                                                          | 2.77E+08 | 91002457 | 0.328639 | COG0803 | P | "ABC-type metal ion transport system, periplasmic componenK09818      |        | METABOLISM                         |
| PA2412 | conserved hypothetical protein                                     | 0        | 7.33E+08 | 1000     | COG3251 | S | Uncharacterized protein conserved in bacteria                         | K05375 | POORLY CHARACTERIZED               |
| PA2424 | pvdL PvdL                                                          | 50919973 | 0        | 0        | COG3433 | Q | Aryl carrier domain                                                   | K04784 | METABOLISM                         |
| PA2424 | pvdL PvdL                                                          | 50919973 | 0        | 0        | COG3018 | I | Acyl-CoA synthetases (AMP-forming)/AMP-acyl ligases II                | K00666 | METABOLISM                         |
| PA2424 | pvdL PvdL                                                          | 50919973 | 0        | 0        | COG3433 | Q | Aryl carrier domain                                                   | K12239 | METABOLISM                         |
| PA2424 | pvdL PvdL                                                          | 50919973 | 0        | 0        | COG3433 | Q | Aryl carrier domain                                                   | K01252 | METABOLISM                         |
| PA2424 | pvdL PvdL                                                          | 50919973 | 0        | 0        | COG3018 | I | Acyl-CoA synthetases (AMP-forming)/AMP-acyl ligases II                | K01911 | METABOLISM                         |
| PA2424 | pvdL PvdL                                                          | 50919973 | 0        | 0        | COG3018 | I | Acyl-CoA synthetases (AMP-forming)/AMP-acyl ligases II                | K01897 | METABOLISM                         |
| PA2424 | pvdL PvdL                                                          | 50919973 | 0        | 0        | COG3018 | I | Acyl-CoA synthetases (AMP-forming)/AMP-acyl ligases II                | K01911 | METABOLISM                         |
| PA2424 | pvdL PvdL                                                          | 50919973 | 0        | 0        | COG3433 | Q | Aryl carrier domain                                                   | K04788 | METABOLISM                         |
| PA2424 | pvdL PvdL                                                          | 50919973 | 0        | 0        | COG3018 | I | Acyl-CoA synthetases (AMP-forming)/AMP-acyl ligases II                | K00666 | METABOLISM                         |
| PA2424 | pvdL PvdL                                                          | 50919973 | 0        | 0        | COG3018 | I | Acyl-CoA synthetases (AMP-forming)/AMP-acyl ligases II                | K01897 | METABOLISM                         |
| PA2424 | pvdL PvdL                                                          | 50919973 | 0        | 0        | COG3433 | Q | Aryl carrier domain                                                   | K04779 | METABOLISM                         |
| PA2433 | hypothetical protein                                               | 1.31E+08 | 1.5E+08  | 1.146884 |         |   |                                                                       |        |                                    |
| PA2446 | gcvH2 glycine cleavage system protein H2                           | 52540330 | 1.13E+08 | 2.144673 | COG0509 | E | Glycine cleavage system H protein (lipoate-binding)                   | K02437 | METABOLISM                         |
| PA2453 | hypothetical protein                                               | 2.73E+08 | 0        | 0        |         |   |                                                                       |        |                                    |
| PA2476 | dsbG thiol:disulfide interchange protein DsbG                      | 36514881 | 29810023 | 0.81638  | COG1651 | O | Protein-disulfide isomerase                                           | K03981 | CELLULAR PROCESSES AND SIGNALING   |
| PA2476 | dsbG thiol:disulfide interchange protein DsbG                      | 36514881 | 29810023 | 0.81638  | COG1651 | O | Protein-disulfide isomerase                                           | K03805 | CELLULAR PROCESSES AND SIGNALING   |
| PA2507 | catA *catechol 1                                                   | 3.12E+09 | 7.2E+08  | 0.230923 | COG3485 | Q | "Protocatechuate 3,4-dioxygenase beta subunit"                        | K03381 | METABOLISM                         |
| PA2507 | catA *catechol 1                                                   | 3.12E+09 | 7.2E+08  | 0.230923 | COG3485 | Q | "Protocatechuate 3,4-dioxygenase beta subunit"                        | K00449 | METABOLISM                         |
| PA2507 | catA *catechol 1                                                   | 3.12E+09 | 7.2E+08  | 0.230923 | COG3485 | Q | "Protocatechuate 3,4-dioxygenase beta subunit"                        | K00448 | METABOLISM                         |
| PA2508 | catC muconolactone delta-isomerase                                 | 56314074 | 1.58E+08 | 2.802931 | COG4829 | Q | Muconolactone delta-isomerase                                         | K01828 | METABOLISM                         |
| PA2508 | catC muconolactone delta-isomerase                                 | 56314074 | 1.58E+08 | 2.802931 | COG4829 | Q | Muconolactone delta-isomerase                                         | K03646 | METABOLISM                         |
| PA2525 | opmB Outer membrane protein                                        | 63110458 | 0        | 0        | COG1538 | M | Outer membrane protein                                                | K03287 | CELLULAR PROCESSES AND SIGNALING   |
| PA2525 | opmB Outer membrane protein                                        | 63110458 | 0        | 0        | COG1538 | M | Outer membrane protein                                                | K12340 | CELLULAR PROCESSES AND SIGNALING   |
| PA2525 | opmB Outer membrane protein                                        | 63110458 | 0        | 0        | COG1538 | M | Outer membrane protein                                                | K03287 | CELLULAR PROCESSES AND SIGNALING   |
| PA2525 | opmB Outer membrane protein                                        | 63110458 | 0        | 0        | COG1538 | M | Outer membrane protein                                                | K12340 | CELLULAR PROCESSES AND SIGNALING   |
| PA2532 | tpx thiol peroxidase                                               | 1.44E+08 | 3.37E+08 | 2.341829 | COG2077 | O | Peroxioredoxin                                                        | K11065 | CELLULAR PROCESSES AND SIGNALING   |
| PA2561 | ctpH CtpH                                                          | 0        | 6.89E+08 | 1000     | COG0840 | T | Methyl-accepting chemotaxis protein                                   | K03406 | CELLULAR PROCESSES AND SIGNALING   |
| PA2561 | ctpH CtpH                                                          | 0        | 6.89E+08 | 1000     | COG0840 | T | Methyl-accepting chemotaxis protein                                   | K03406 | CELLULAR PROCESSES AND SIGNALING   |
| PA2573 | probable chemotaxis transducer                                     | 1.03E+08 | 1.04E+09 | 10.06826 | COG0840 | T | Methyl-accepting chemotaxis protein                                   | K03406 | CELLULAR PROCESSES AND SIGNALING   |
| PA2573 | probable chemotaxis transducer                                     | 1.03E+08 | 1.04E+09 | 10.06826 | COG0840 | T | Methyl-accepting chemotaxis protein                                   | K03406 | CELLULAR PROCESSES AND SIGNALING   |
| PA2575 | hypothetical protein                                               | 1.27E+08 | 1.56E+08 | 1.221266 | COG3560 | R | Predicted oxidoreductase related to nitroreductase                    | K07078 | POORLY CHARACTERIZED               |
| PA2582 | hypothetical protein                                               | 7.84E+08 | 5.6E+08  | 0.714719 | COG1309 | T | Activator of osmoprotectant transporter ProP                          | K03607 | CELLULAR PROCESSES AND SIGNALING   |
| PA2606 | conserved hypothetical protein                                     | 0        | 8433441  | 1000     | COG2923 | P | Uncharacterized protein involved in the oxidation of intracelluK07236 |        | METABOLISM                         |
| PA2612 | serS seryl-tRNA synthetase                                         | 26260504 | 0        | 0        | COG0172 | J | Seryl-tRNA synthetase                                                 | K01875 | INFORMATION STORAGE AND PROCESSING |
| PA2619 | infA Initiation factor                                             | 1.03E+08 | 59632693 | 0.581773 | COG0361 | J | Translation initiation factor 1 (IF-1)                                | K03236 | INFORMATION STORAGE AND PROCESSING |
| PA2619 | infA Initiation factor                                             | 1.03E+08 | 59632693 | 0.581773 | COG0361 | J | Translation initiation factor 1 (IF-1)                                | K02518 | INFORMATION STORAGE AND PROCESSING |
| PA2620 | cipA ATP-binding protease component CipA                           | 2.18E+08 | 1.14E+08 | 0.520334 | COG0542 | O | "ATPases with chaperone activity, ATP-binding subunit"                | K11907 | CELLULAR PROCESSES AND SIGNALING   |
| PA2620 | cipA ATP-binding protease component CipA                           | 2.18E+08 | 1.14E+08 | 0.520334 | COG0542 | O | "ATPases with chaperone activity, ATP-binding subunit"                | K03696 | CELLULAR PROCESSES AND SIGNALING   |
| PA2620 | cipA ATP-binding protease component CipA                           | 2.18E+08 | 1.14E+08 | 0.520334 | COG0542 | O | "ATPases with chaperone activity, ATP-binding subunit"                | K03696 | CELLULAR PROCESSES AND SIGNALING   |
| PA2620 | cipA ATP-binding protease component CipA                           | 2.18E+08 | 1.14E+08 | 0.520334 | COG0542 | O | "ATPases with chaperone activity, ATP-binding subunit"                | K03694 | CELLULAR PROCESSES AND SIGNALING   |
| PA2622 | cspD cold-shock protein CspD                                       | 2.3E+08  | 1.24E+08 | 0.538447 | COG1278 | K | Cold shock proteins                                                   | K03704 | INFORMATION STORAGE AND PROCESSING |
| PA2623 | icd isocitrate dehydrogenase                                       | 2.11E+08 | 1.27E+09 | 6.008676 | COG0538 | C | Isocitrate dehydrogenases                                             | K00030 | METABOLISM                         |
| PA2623 | icd isocitrate dehydrogenase                                       | 2.11E+08 | 1.27E+09 | 6.008676 | COG0538 | C | Isocitrate dehydrogenases                                             | K00031 | METABOLISM                         |
| PA2624 | idh isocitrate dehydrogenase                                       | 3.01E+08 | 2.08E+09 | 6.935855 | COG2838 | C | Monomeric isocitrate dehydrogenase                                    | K00031 | METABOLISM                         |
| PA2626 | trmU tRNA methyltransferase                                        | 0        | 62963101 | 1000     | COG0482 | J | "Predicted tRNA(5-methylaminomethyl-2-thiouridylylate) methK00566     |        | INFORMATION STORAGE AND PROCESSING |
| PA2638 | nuoB NADH dehydrogenase I chain B                                  | 0        | 69624370 | 1000     | COG0377 | C | NADH:ubiquinone oxidoreductase 20 kD subunit and related K05582       |        | METABOLISM                         |
| PA2638 | nuoB NADH dehydrogenase I chain B                                  | 0        | 69624370 | 1000     | COG0377 | C | NADH:ubiquinone oxidoreductase 20 kD subunit and related K00331       |        | METABOLISM                         |
| PA2640 | nuoE NADH dehydrogenase I chain E                                  | 4.61E+08 | 3.74E+08 | 0.81103  | COG1905 | C | NADH:ubiquinone oxidoreductase 24 kD subunit                          | K00334 | METABOLISM                         |
| PA2640 | nuoE NADH dehydrogenase I chain E                                  | 4.61E+08 | 3.74E+08 | 0.81103  | COG1905 | C | NADH:ubiquinone oxidoreductase 24 kD subunit                          | K00127 | METABOLISM                         |
| PA2641 | nuoF NADH dehydrogenase I chain F                                  | 32569986 | 68367995 | 2.09911  | COG1894 | C | "NADH:ubiquinone oxidoreductase, NADH-binding (51 kD) subK00335       |        | METABOLISM                         |
| PA2641 | nuoF NADH dehydrogenase I chain F                                  | 32569986 | 68367995 | 2.09911  | COG1894 | C | "NADH:ubiquinone oxidoreductase, NADH-binding (51 kD) subK00335       |        | METABOLISM                         |
| PA2641 | nuoF NADH dehydrogenase I chain F                                  | 32569986 | 68367995 | 2.09911  | COG1894 | C | "NADH:ubiquinone oxidoreductase, NADH-binding (51 kD) subK00335       |        | METABOLISM                         |
| PA2642 | nuoG NADH dehydrogenase I chain G                                  | 64566992 | 1.49E+08 | 2.300599 | COG1034 | C | NADH dehydrogenase/NADH:ubiquinone oxidoreductase 75 k K00336         |        | METABOLISM                         |
| PA2644 | nuoL NADH Dehydrogenase I chain I                                  | 1.8E+08  | 2.85E+08 | 1.5838   | COG1143 | C | Formate hydrogenlyase subunit 6/NADH:ubiquinone oxidoreK00338         |        | METABOLISM                         |
| PA2652 | methyl-accepting chemotaxis protein                                | 2.3E+08  | 1.56E+09 | 6.781302 | COG4564 | T | Signal transduction histidine kinase                                  | K02480 | CELLULAR PROCESSES AND SIGNALING   |
| PA2652 | methyl-accepting chemotaxis protein                                | 2.3E+08  | 1.56E+09 | 6.781302 | COG0840 | N | Methyl-accepting chemotaxis protein                                   | K03406 | CELLULAR PROCESSES AND SIGNALING   |
| PA2652 | methyl-accepting chemotaxis protein                                | 2.3E+08  | 1.56E+09 | 6.781302 | COG0840 | N | Methyl-accepting chemotaxis protein                                   | K03406 | CELLULAR PROCESSES AND SIGNALING   |
| PA2654 | tipQ TlpQ                                                          | 4.98E+08 | 7.14E+08 | 1.432656 | COG0840 | T | Methyl-accepting chemotaxis protein                                   | K03406 | CELLULAR PROCESSES AND SIGNALING   |
| PA2654 | tipQ TlpQ                                                          | 4.98E+08 | 7.14E+08 | 1.432656 | COG0840 | N | Methyl-accepting chemotaxis protein                                   | K03406 | CELLULAR PROCESSES AND SIGNALING   |
| PA2659 | hypothetical protein                                               | 2.14E+09 | 2.2E+09  | 1.025548 |         |   |                                                                       |        |                                    |
| PA2667 | mvaU MvaU                                                          | 2.65E+09 | 1.98E+09 | 0.748117 |         |   |                                                                       |        |                                    |
| PA2709 | cysK cysteine synthase A                                           | 0        | 97127150 | 1000     | COG0031 | E | Cysteine synthase                                                     | K12339 | METABOLISM                         |
| PA2709 | cysK cysteine synthase A                                           | 0        | 97127150 | 1000     | COG0031 | E | Cysteine synthase                                                     | K01697 | METABOLISM                         |
| PA2709 | cysK cysteine synthase A                                           | 0        | 97127150 | 1000     | COG0031 | E | Cysteine synthase                                                     | K01738 | METABOLISM                         |
| PA2735 | type I HsdM methyltransferase                                      | 50453081 | 0        | 0        | COG0286 | V | Type I restriction-modification system methyltransferase subK03427    |        | CELLULAR PROCESSES AND SIGNALING   |
| PA2738 | himA "Integration host factor                                      | 1.04E+09 | 1.56E+09 | 1.495737 | COG0776 | L | Bacterial nucleoid DNA-binding protein                                | K04764 | INFORMATION STORAGE AND PROCESSING |
| PA2738 | himA "Integration host factor                                      | 1.04E+09 | 1.56E+09 | 1.495737 | COG0776 | L | Bacterial nucleoid DNA-binding protein                                | K05787 | INFORMATION STORAGE AND PROCESSING |
| PA2738 | himA "Integration host factor                                      | 1.04E+09 | 1.56E+09 | 1.495737 | COG0776 | L | Bacterial nucleoid DNA-binding protein                                | K03530 | INFORMATION STORAGE AND PROCESSING |
| PA2738 | himA "Integration host factor                                      | 1.04E+09 | 1.56E+09 | 1.495737 | COG0776 | L | Bacterial nucleoid DNA-binding protein                                | K05788 | INFORMATION STORAGE AND PROCESSING |
| PA2739 | pheT "phenylalanyl-tRNA synthetase                                 | 0        | 7233645  | 1000     | COG0073 | R | ENAP domain                                                           | K01874 | POORLY CHARACTERIZED               |
| PA2739 | pheT "phenylalanyl-tRNA synthetase                                 | 0        | 7233645  | 1000     | COG0073 | R | ENAP domain                                                           | K06878 | POORLY CHARACTERIZED               |
| PA2739 | pheT "phenylalanyl-tRNA synthetase                                 | 0        | 7233645  | 1000     | COG0073 | R | Phenylalanyl-tRNA synthetase beta subunit                             | K01890 | INFORMATION STORAGE AND PROCESSING |
| PA2739 | pheT "phenylalanyl-tRNA synthetase                                 | 0        | 7233645  | 1000     | COG0073 | R | ENAP domain                                                           | K01890 | POORLY CHARACTERIZED               |
| PA2740 | pheS "phenylalanyl-tRNA synthetase                                 | 38812159 | 1.63E+08 | 4.196589 | COG0016 | J | Phenylalanyl-tRNA synthetase alpha subunit                            | K01889 | INFORMATION STORAGE AND PROCESSING |
| PA2742 | rplM S05 ribosomal protein L35                                     | 0        | 1.16E+08 | 1000     | COG0291 | P | Ribosomal protein L35                                                 |        |                                    |

|        |      |                                                                  |          |          |          |         |   |                                                                   |        |                                    |
|--------|------|------------------------------------------------------------------|----------|----------|----------|---------|---|-------------------------------------------------------------------|--------|------------------------------------|
| PA2800 | vacJ | VacJ                                                             | 1.59E+09 | 9.02E+08 | 0.568801 | COG2853 | M | Surface lipoprotein                                               | K04754 | CELLULAR PROCESSES AND SIGNALING   |
| PA2805 |      | hypothetical protein                                             | 8.14E+08 | 6.23E+08 | 0.765309 |         |   |                                                                   |        |                                    |
| PA2817 |      | hypothetical protein                                             | 6.06E+08 | 2.69E+08 | 0.444123 |         |   |                                                                   |        |                                    |
| PA2823 |      | conserved hypothetical protein                                   | 1.8E+08  | 1.09E+08 | 0.607366 | COG2607 | R | Predicted ATPase (AAA superfamily)                                | K06923 | POORLY CHARACTERIZED               |
| PA2827 |      | conserved hypothetical protein                                   | 17254526 | 0        | 0        | COG0229 | O | Conserved domain frequently associated with peptide methio        | K12267 | CELLULAR PROCESSES AND SIGNALING   |
| PA2827 |      | conserved hypothetical protein                                   | 17254526 | 0        | 0        | COG0229 | O | Conserved domain frequently associated with peptide methio        | K07305 | CELLULAR PROCESSES AND SIGNALING   |
| PA2851 | efp  | translation elongation factor P                                  | 8.58E+08 | 1.13E+09 | 1.314927 | COG0231 | J | Translation elongation factor P (EF-P)/translation initiation fac | K02356 | INFORMATION STORAGE AND PROCESSING |
| PA2851 | efp  | translation elongation factor P                                  | 8.58E+08 | 1.13E+09 | 1.314927 | COG0231 | J | Translation elongation factor P (EF-P)/translation initiation fac | K03263 | INFORMATION STORAGE AND PROCESSING |
| PA2853 | oprl | Outer membrane lipoprotein OprI precursor                        | 2.86E+09 | 3.64E+09 | 1.270996 |         |   |                                                                   |        |                                    |
| PA2867 |      | probable chemotaxis transducer                                   | 59727191 | 7.86E+08 | 13.16402 | COG0840 | T | Methyl-accepting chemotaxis protein                               | K03406 | CELLULAR PROCESSES AND SIGNALING   |
| PA2867 |      | probable chemotaxis transducer                                   | 59727191 | 7.86E+08 | 13.16402 | COG0840 | N | Methyl-accepting chemotaxis protein                               | K03406 | CELLULAR PROCESSES AND SIGNALING   |
| PA2883 |      | hypothetical protein                                             | 2.9E+08  | 1.41E+08 | 0.487374 |         |   |                                                                   |        |                                    |
| PA2894 |      | hypothetical protein                                             | 35239777 | 0        | 0        |         |   |                                                                   |        |                                    |
| PA2900 |      | probable outer membrane protein precursor                        | 0        | 11238943 | 1000     | COG2885 | M | Outer membrane protein and related peptidoglycan-associate        | K03640 | CELLULAR PROCESSES AND SIGNALING   |
| PA2900 |      | probable outer membrane protein precursor                        | 0        | 11238943 | 1000     | COG2885 | M | Outer membrane protein and related peptidoglycan-associate        | K03286 | CELLULAR PROCESSES AND SIGNALING   |
| PA2901 |      | hypothetical protein                                             | 1.64E+08 | 2.24E+08 | 1.363111 |         |   |                                                                   |        |                                    |
| PA2920 |      | probable chemotaxis transducer                                   | 88586532 | 6.58E+08 | 7.425097 | COG0840 | T | Methyl-accepting chemotaxis protein                               | K03406 | CELLULAR PROCESSES AND SIGNALING   |
| PA2920 |      | probable chemotaxis transducer                                   | 88586532 | 6.58E+08 | 7.425097 | COG0840 | N | Methyl-accepting chemotaxis protein                               | K03406 | CELLULAR PROCESSES AND SIGNALING   |
| PA2945 |      | conserved hypothetical protein                                   | 1.97E+08 | 2.58E+08 | 1.307847 | COG0523 | R | Putative GTPases (G3E family)                                     | K02234 | POORLY CHARACTERIZED               |
| PA2950 | fabV | FabV                                                             | 32442538 | 2.15E+08 | 6.632426 | COG3007 | S | Uncharacterized paraquat-inducible protein B                      | K10783 | POORLY CHARACTERIZED               |
| PA2951 | etfA | electron transfer flavoprotein alpha-subunit                     | 3.99E+08 | 9.34E+08 | 2.340312 | COG0205 | C | "Electron transfer flavoprotein, alpha subunit"                   | K03522 | METABOLISM                         |
| PA2952 | etfB | electron transfer flavoprotein beta-subunit                      | 3.1E+08  | 2.02E+09 | 6.506742 | COG2086 | C | "Electron transfer flavoprotein, beta subunit"                    | K03521 | METABOLISM                         |
| PA2953 |      | electron transfer flavoprotein-ubiquinone oxidoreductase         | 0        | 1.16E+08 | 1000     | COG0644 | C | Dehydrogenases (Flavoproteins)                                    | K00311 | METABOLISM                         |
| PA2953 |      | electron transfer flavoprotein-ubiquinone oxidoreductase         | 0        | 1.16E+08 | 1000     | COG0644 | C | Dehydrogenases (Flavoproteins)                                    | K10960 | METABOLISM                         |
| PA2953 |      | electron transfer flavoprotein-ubiquinone oxidoreductase         | 0        | 1.16E+08 | 1000     | COG0644 | C | Dehydrogenases (Flavoproteins)                                    | K00313 | METABOLISM                         |
| PA2953 |      | electron transfer flavoprotein-ubiquinone oxidoreductase         | 0        | 1.16E+08 | 1000     | COG2440 | C | Ferredoxin-like protein                                           | K03855 | METABOLISM                         |
| PA2957 |      | probable transcriptional regulator                               | 1.67E+08 | 1.62E+08 | 0.97071  |         |   |                                                                   |        |                                    |
| PA2962 | tnk  | thymidylate kinase                                               | 32320274 | 24769320 | 0.766371 | COG0125 | F | Thymidylate kinase                                                | K00943 | METABOLISM                         |
| PA2966 | acpP | acyl carrier protein                                             | 2.63E+08 | 2.16E+08 | 0.822717 | COG0236 | Q | Acyl carrier protein                                              | K02078 | METABOLISM                         |
| PA2966 | acpP | acyl carrier protein                                             | 2.63E+08 | 2.16E+08 | 0.822717 | COG0236 | Q | Acyl carrier protein                                              | K14188 | METABOLISM                         |
| PA2966 | acpP | acyl carrier protein                                             | 2.63E+08 | 2.16E+08 | 0.822717 | COG0236 | I | Acyl carrier protein                                              | K02078 | METABOLISM                         |
| PA2966 | acpP | acyl carrier protein                                             | 2.63E+08 | 2.16E+08 | 0.822717 | COG0236 | I | Acyl carrier protein                                              | K14188 | METABOLISM                         |
| PA2967 | fabG | 3-oxoacyl-[acyl-carrier-protein] reductase                       | 4.59E+09 | 1.26E+09 | 0.275097 | COG1028 | Q | Dehydrogenases with different specificities (related to short-c   | K00059 | METABOLISM                         |
| PA2967 | fabG | 3-oxoacyl-[acyl-carrier-protein] reductase                       | 4.59E+09 | 1.26E+09 | 0.275097 | COG1028 | I | Dehydrogenases with different specificities (related to short-c   | K00059 | METABOLISM                         |
| PA2967 | fabG | 3-oxoacyl-[acyl-carrier-protein] reductase                       | 4.59E+09 | 1.26E+09 | 0.275097 | COG1028 | R | Dehydrogenases with different specificities (related to short-c   | K00059 | POORLY CHARACTERIZED               |
| PA2968 | fabD | malonyl-CoA-[acyl-carrier-protein] transacylase                  | 1.33E+08 | 6.88E+08 | 5.171332 | COG0331 | I | (acyl-carrier-protein) 5-malonyltransferase                       | K00645 | METABOLISM                         |
| PA2968 | fabD | malonyl-CoA-[acyl-carrier-protein] transacylase                  | 1.33E+08 | 6.88E+08 | 5.171332 | COG0331 | I | (acyl-carrier-protein) 5-malonyltransferase                       | K11533 | METABOLISM                         |
| PA2970 | rpmF | 50S ribosomal protein L32                                        | 3.12E+10 | 2.96E+10 | 0.946703 | COG0333 | J | Ribosomal protein L32                                             | K02911 | INFORMATION STORAGE AND PROCESSING |
| PA2976 | rne  | ribonuclease E                                                   | 2.05E+08 | 1.21E+09 | 5.913099 | COG1530 | J | Ribonucleases G and E                                             | K08300 | INFORMATION STORAGE AND PROCESSING |
| PA2976 | rne  | ribonuclease E                                                   | 2.05E+08 | 1.21E+09 | 5.913099 | COG1530 | J | Ribonucleases G and E                                             | K08301 | INFORMATION STORAGE AND PROCESSING |
| PA2980 |      | conserved hypothetical protein                                   | 4.33E+09 | 2.82E+09 | 0.66331  | COG2835 | S | Uncharacterized conserved protein                                 | K09791 | POORLY CHARACTERIZED               |
| PA3001 |      | probable glyceraldehyde 3-phosphate dehydrogenase                | 1.05E+08 | 2.92E+09 | 27.7279  | COG0057 | G | Glyceraldehyde-3-phosphate dehydrogenase/erythrose-4-ph           | K03472 | METABOLISM                         |
| PA3001 |      | probable glyceraldehyde 3-phosphate dehydrogenase                | 1.05E+08 | 2.92E+09 | 27.7279  | COG0057 | G | Glyceraldehyde-3-phosphate dehydrogenase/erythrose-4-ph           | K00150 | METABOLISM                         |
| PA3001 |      | probable glyceraldehyde 3-phosphate dehydrogenase                | 1.05E+08 | 2.92E+09 | 27.7279  | COG0057 | G | Glyceraldehyde-3-phosphate dehydrogenase/erythrose-4-ph           | K00134 | METABOLISM                         |
| PA3003 |      | hypothetical protein                                             | 1.87E+08 | 2.35E+08 | 1.258991 |         |   |                                                                   |        |                                    |
| PA3009 |      | hypothetical protein                                             | 64967836 | 87854069 | 1.35227  |         |   |                                                                   |        |                                    |
| PA3013 | faoB | fatty-acid oxidation complex beta-subunit                        | 0        | 2.06E+08 | 1000     | COG0183 | I | Acetyl-CoA acetyltransferase                                      | K00632 | METABOLISM                         |
| PA3013 | faoB | fatty-acid oxidation complex beta-subunit                        | 0        | 2.06E+08 | 1000     | COG0183 | I | Acetyl-CoA acetyltransferase                                      | K00626 | METABOLISM                         |
| PA3014 | faoA | fatty-acid oxidation complex alpha-subunit                       | 0        | 1.66E+08 | 1000     | COG1024 | I | Enoyl-CoA hydratase/carnithine racemase                           | K01692 | METABOLISM                         |
| PA3014 | faoA | fatty-acid oxidation complex alpha-subunit                       | 0        | 1.66E+08 | 1000     | COG1250 | I | 3-hydroxyacyl-CoA dehydrogenase                                   | K00074 | METABOLISM                         |
| PA3014 | faoA | fatty-acid oxidation complex alpha-subunit                       | 0        | 1.66E+08 | 1000     | COG1250 | I | 3-hydroxyacyl-CoA dehydrogenase                                   | K01782 | METABOLISM                         |
| PA3014 | faoA | fatty-acid oxidation complex alpha-subunit                       | 0        | 1.66E+08 | 1000     | COG1250 | I | 3-hydroxyacyl-CoA dehydrogenase                                   | K01825 | METABOLISM                         |
| PA3014 | faoA | fatty-acid oxidation complex alpha-subunit                       | 0        | 1.66E+08 | 1000     | COG1250 | I | 3-hydroxyacyl-CoA dehydrogenase                                   | K07516 | METABOLISM                         |
| PA3022 |      | hypothetical protein                                             | 0        | 67341969 | 1000     | CG3217  | R | Uncharacterized Fe-S protein                                      | K07140 | POORLY CHARACTERIZED               |
| PA3024 |      | probable carbohydrate kinase                                     | 0        | 60210670 | 1000     | COG1070 | G | Sugar (pentulose and hexulose) kinases                            | K00851 | METABOLISM                         |
| PA3024 |      | probable carbohydrate kinase                                     | 0        | 60210670 | 1000     | COG1070 | G | Sugar (pentulose and hexulose) kinases                            | K00854 | METABOLISM                         |
| PA3024 |      | probable carbohydrate kinase                                     | 0        | 60210670 | 1000     | COG1070 | G | Sugar (pentulose and hexulose) kinases                            | K00880 | METABOLISM                         |
| PA3024 |      | probable carbohydrate kinase                                     | 0        | 60210670 | 1000     | COG1070 | G | Sugar (pentulose and hexulose) kinases                            | K00848 | METABOLISM                         |
| PA3031 |      | hypothetical protein                                             | 0        | 3.41E+08 | 1000     |         |   |                                                                   |        |                                    |
| PA3040 |      | conserved hypothetical protein                                   | 1.09E+08 | 1.09E+08 | 1.000734 | COG4575 | S | Uncharacterized conserved protein                                 | K05594 | POORLY CHARACTERIZED               |
| PA3049 | rmf  | ribosome modulation factor                                       | 1.48E+08 | 55822468 | 0.376551 | COG3130 | J | Ribosome modulation factor                                        | K03812 | INFORMATION STORAGE AND PROCESSING |
| PA3058 | pelG | PelG                                                             | 8931413  | 0        | 0        |         |   |                                                                   |        |                                    |
| PA3061 | pelD | PelD(cyclic diguanylate effector involved in pellicle formation) | 0        | 1.08E+08 | 1000     | COG2203 | T | FOG: GAF domain                                                   | K00936 | CELLULAR PROCESSES AND SIGNALING   |
| PA3062 | pelC | PelC                                                             | 27330860 | 4.08E+08 | 14.9424  |         |   |                                                                   |        |                                    |
| PA3074 |      | hypothetical protein                                             | 35028585 | 0        | 0        | COG2304 | R | Uncharacterized protein containing a von Willebrand factor        | K07114 | POORLY CHARACTERIZED               |
| PA3085 |      | hypothetical protein                                             | 19591397 | 0        | 0        | COG3139 | S | Uncharacterized protein conserved in bacteria                     | K09916 | POORLY CHARACTERIZED               |
| PA3101 | xcpT | general secretion pathway protein G                              | 7.64E+08 | 2.42E+08 | 0.317276 | COG2165 | U | "Type II secretory pathway, pseudopilin PuIG"                     | K02457 | CELLULAR PROCESSES AND SIGNALING   |
| PA3101 | xcpT | general secretion pathway protein G                              | 7.64E+08 | 2.42E+08 | 0.317276 | COG2165 | U | "Type II secretory pathway, pseudopilin PuIG"                     | K02679 | CELLULAR PROCESSES AND SIGNALING   |
| PA3101 | xcpT | general secretion pathway protein G                              | 7.64E+08 | 2.42E+08 | 0.317276 | COG2165 | N | "Type II secretory pathway, pseudopilin PuIG"                     | K02458 | CELLULAR PROCESSES AND SIGNALING   |
| PA3101 | xcpT | general secretion pathway protein G                              | 7.64E+08 | 2.42E+08 | 0.317276 | COG2165 | U | "Type II secretory pathway, pseudopilin PuIG"                     | K02246 | CELLULAR PROCESSES AND SIGNALING   |
| PA3101 | xcpT | general secretion pathway protein G                              | 7.64E+08 | 2.42E+08 | 0.317276 | COG2165 | U | "Type II secretory pathway, pseudopilin PuIG"                     | K02456 | CELLULAR PROCESSES AND SIGNALING   |
| PA3101 | xcpT | general secretion pathway protein G                              | 7.64E+08 | 2.42E+08 | 0.317276 | COG2165 | U | "Type II secretory pathway, pseudopilin PuIG"                     | K02457 | CELLULAR PROCESSES AND SIGNALING   |
| PA3101 | xcpT | general secretion pathway protein G                              | 7.64E+08 | 2.42E+08 | 0.317276 | COG2165 | N | "Type II secretory pathway, pseudopilin PuIG"                     | K02246 | CELLULAR PROCESSES AND SIGNALING   |
| PA3101 | xcpT | general secretion pathway protein G                              | 7.64E+08 | 2.42E+08 | 0.317276 | COG2165 | N | "Type II secretory pathway, pseudopilin PuIG"                     | K02456 | CELLULAR PROCESSES AND SIGNALING   |
| PA3101 | xcpT | general secretion pathway protein G                              | 7.64E+08 | 2.42E+08 | 0.317276 | COG2165 | N | "Type II secretory pathway, pseudopilin PuIG"                     | K02457 | CELLULAR PROCESSES AND SIGNALING   |
| PA3101 | xcpT | general secretion pathway protein G                              | 7.64E+08 | 2.42E+08 | 0.317276 | COG2165 | N | "Type II secretory pathway, pseudopilin PuIG"                     | K02456 | CELLULAR PROCESSES AND SIGNALING   |
| PA3101 | xcpT | general secretion pathway protein G                              | 7.64E+08 | 2.42E+08 | 0.317276 | COG2165 | N | "Type II secretory pathway, pseudopilin PuIG"                     | K02679 | CELLULAR PROCESSES AND SIGNALING   |
| PA3101 | xcpT | general secretion pathway protein G                              | 7.64E+08 | 2.42E+08 | 0.317276 | COG2165 | N | "Type II secretory pathway, pseudopilin PuIG"                     | K02458 | CELLULAR PROCESSES AND SIGNALING   |
| PA3101 | xcpT | general secretion pathway protein G                              | 7.64E+08 | 2.42E+08 | 0.317276 | COG2165 | N | "Type II secretory pathway, pseudopilin PuIG"                     | K02457 | CELLULAR PROCESSES AND SIGNALING   |
| PA3101 | xcpT | general secretion pathway protein G                              | 7.64E+08 | 2.42E+08 | 0.317276 | COG2165 | N | "Type II secretory pathway, pseudopilin PuIG"                     | K02456 | CELLULAR PROCESSES AND SIGNALING   |
| PA3101 | xcpT | general secretion pathway protein G                              | 7.64E+08 | 2.42E+08 | 0.317276 | COG2165 | N | "Type II secretory pathway, pseudopilin PuIG"                     | K02679 | CELLULAR PROCESSES AND SIGNALING   |
| PA3101 | xcpT | general secretion pathway protein G                              | 7.64E+08 | 2.42E+08 | 0.317276 | COG2165 | N | "Type II secretory pathway, pseudopilin PuIG"                     | K02458 | CELLULAR PROCESSES AND SIGNALING   |
| PA3101 | xcpT | general secretion pathway protein G                              | 7.64E+08 | 2.42E+08 | 0.317276 | COG2165 | N | "Type II secretory pathway, pseudopilin PuIG"                     | K02457 | CELLULAR PROCESSES AND SIGNALING   |
| PA3101 | xcpT | general secretion pathway protein G                              | 7.64E+08 | 2.42E+08 | 0.317276 | COG2165 | N | "Type II secretory pathway, pseudopilin PuIG"                     | K02456 | CELLULAR PROCESSES AND SIGNALING   |
| PA3101 | xcpT | general secretion pathway protein G                              | 7.64E+08 | 2.42E+08 | 0.317276 | COG2165 | N | "Type II secretory pathway, pseudopilin PuIG"                     | K02679 | CELLULAR PROCESSES AND SIGNALING   |
| PA3101 | xcpT | general secretion pathway protein G                              | 7.64E+08 | 2.42E+08 | 0.317276 | COG2165 | N | "Type II secretory pathway, pseudopilin PuIG"                     | K02458 | CELLULAR PROCESSES AND SIGNALING   |
| PA3101 | xcpT | general secretion pathway protein G                              | 7.64E+08 | 2.42E+08 | 0.317276 | COG2165 | N | "Type II secretory pathway, pseudopilin PuIG"                     | K02457 | CELLULAR PROCESSES AND SIGNALING   |
| PA3101 | xcpT | general secretion pathway protein G                              | 7.64E+08 | 2.42E+08 | 0.317276 | COG2165 | N | "Type II secretory pathway, pseudopilin PuIG"                     | K02456 | CELLULAR PROCESSES AND SIGNALING   |
| PA3101 | xcpT | general secretion pathway protein G                              | 7.64E+08 | 2.42E+08 | 0.317276 | COG2165 | N | "Type II secretory pathway, pseudopilin PuIG"                     | K02679 | CELLULAR PROCESSES AND SIGNALING   |
| PA3101 | xcpT | general secretion pathway protein G                              | 7.64E+08 | 2.42E+08 | 0.317276 | COG2165 | N | "Type II secretory pathway, pseudopilin PuIG"                     | K02458 | CELLULAR PROCESSES AND SIGNALING   |
| PA3101 | xcpT | general secretion pathway protein G                              | 7.64E+08 | 2.42E+08 | 0.317276 | COG2165 | N | "Type II secretory pathway, pseudopilin PuIG"                     | K02457 | CELLULAR PROCESSES AND SIGNALING   |
| PA3101 | xcpT | general secretion pathway protein G                              | 7.64E+08 | 2.42E+08 | 0.317276 | COG2165 | N | "Type II secretory pathway, pseudopilin PuIG"                     | K02456 | CELLULAR PROCESSES AND SIGNALING   |
| PA3101 | xcpT | general secretion pathway protein G                              | 7.64E+08 | 2.42E+08 | 0.317276 | COG2165 | N | "Type II secretory pathway, pseudopilin PuIG"                     | K02679 | CELLULAR PROCESSES AND SIGNALING   |
| PA3101 | xcpT | general secretion pathway protein G                              | 7.64E+08 | 2.42E+08 | 0.317276 | COG2165 | N | "Type II secretory pathway, pseudopilin PuIG"                     | K02458 | CELLULAR PROCESSES AND SIGNALING   |
| PA3101 | xcpT | general secretion pathway protein G                              | 7.64E+08 | 2.42E+08 | 0.317276 | COG2165 | N | "Type II secretory pathway, pseudopilin PuIG"                     | K02457 | CELLULAR PROCESSES AND SIGNALING   |
| PA3101 | xcpT | general secretion pathway protein G                              | 7.64E+08 | 2.42E+08 | 0.317276 | COG2165 | N | "Type II secretory pathway, pseudopilin PuIG"                     | K02456 | CELLULAR PROCESSES AND SIGNALING   |
| PA3101 | xcpT | general secretion pathway protein G                              | 7.64E+08 | 2.42E+08 | 0.317276 | COG2165 | N | "Type II secretory pathway, pseudopilin PuIG"                     | K02679 | CELLULAR PROCESSES AND SIGNALING   |
| PA3101 | xcpT | general secretion pathway protein G                              | 7.64E+08 | 2.42E+08 | 0.317276 | COG2165 | N | "Type II secretory pathway, pseudopilin PuIG"                     | K02458 | CELLULAR PROCESSES AND SIGNALING   |
| PA3101 | xcpT | general secretion pathway protein G                              | 7.64E+08 | 2.42E+08 | 0.317276 | COG2165 | N | "Type II secretory pathway, pseudopilin PuIG"                     | K02457 | CELLULAR PROCESSES AND SIGNALING   |
| PA3101 | xcpT | general secretion pathway protein G                              | 7.64E+08 | 2.42E+08 | 0.317276 | COG2165 | N | "Type II secretory pathway, pseudopilin PuIG"                     | K02456 | CELLULAR PROCESSES AND SIGNALING   |
| PA3101 | xcpT | general secretion pathway protein G                              | 7.64E+08 | 2.42E+08 | 0.317276 | COG2165 | N | "Type II secretory pathway, pseudopilin PuIG"                     | K02679 | CELLULAR PROCESSES AND SIGNALING   |
| PA3101 | xcpT | general secretion pathway protein G                              | 7.64E+08 | 2.42E+08 | 0.317276 | COG2165 | N | "Type II secretory pathway, pseudopilin PuIG"                     | K02458 | CELLULAR PROCESSES AND SIGNALING   |
| PA3101 | xcpT | general secretion pathway protein G                              | 7.64E+08 | 2.42E+08 | 0.317276 | COG2165 | N | "Type II secretory pathway, pseudopilin PuIG"                     | K02457 | CELLULAR PROCESSES AND SIGNALING   |
| PA3101 | xcpT | general secretion pathway protein G                              | 7.64E+08 | 2.42E+08 | 0.317276 | COG2165 | N | "Type II secretory pathway, pseudopilin PuIG"                     | K02456 | CELLULAR PROCESSES AND SIGNALING   |
| PA3101 | xcpT | general secretion pathway protein G                              | 7.64E+08 | 2.42E+   |          |         |   |                                                                   |        |                                    |

|        |       |                                                                 |          |           |          |         |   |                                                                         |        |                                    |
|--------|-------|-----------------------------------------------------------------|----------|-----------|----------|---------|---|-------------------------------------------------------------------------|--------|------------------------------------|
| PA3161 | himD  | integration host factor beta subunit                            | 99418437 | 0         | 0        | COG0776 | L | Bacterial nucleoid DNA-binding protein                                  | K05787 | INFORMATION STORAGE AND PROCESSING |
| PA3161 | himD  | integration host factor beta subunit                            | 99418437 | 0         | 0        | COG0776 | L | Bacterial nucleoid DNA-binding protein                                  | K04764 | INFORMATION STORAGE AND PROCESSING |
| PA3162 | rpsA  | 30S ribosomal protein S1                                        | 7.48E+09 | 9.73E+09  | 1.300511 | COG0539 | J | Ribosomal protein S1                                                    | K02945 | INFORMATION STORAGE AND PROCESSING |
| PA3162 | rpsA  | 30S ribosomal protein S1                                        | 7.48E+09 | 9.73E+09  | 1.300511 | COG1093 | J | "Translation initiation factor 2, alpha subunit (eIF-2alpha)"           | K03237 | INFORMATION STORAGE AND PROCESSING |
| PA3163 | cmk   | cytidylate kinase                                               | 17195360 | 35565106  | 2.068297 | COG0283 | F | Cytidylate kinase                                                       | K00945 | METABOLISM                         |
| PA3163 | cmk   | cytidylate kinase                                               | 17195360 | 35565106  | 2.068297 | COG0283 | F | Cytidylate kinase                                                       | K13799 | METABOLISM                         |
| PA3166 | pheA  | chorismate mutase                                               | 0        | 21172882  | 1000     | COG1605 | E | Chorismate mutase                                                       | K14170 | METABOLISM                         |
| PA3166 | pheA  | chorismate mutase                                               | 0        | 21172882  | 1000     | COG1605 | E | Chorismate mutase                                                       | K04516 | METABOLISM                         |
| PA3166 | pheA  | chorismate mutase                                               | 0        | 21172882  | 1000     | COG1605 | E | Chorismate mutase                                                       | K04782 | METABOLISM                         |
| PA3166 | pheA  | chorismate mutase                                               | 0        | 21172882  | 1000     | COG0077 | E | Prephenate dehydratase                                                  | K14170 | METABOLISM                         |
| PA3166 | pheA  | chorismate mutase                                               | 0        | 21172882  | 1000     | COG0077 | E | Prephenate dehydratase                                                  | K04518 | METABOLISM                         |
| PA3166 | pheA  | chorismate mutase                                               | 0        | 21172882  | 1000     | COG1605 | E | Chorismate mutase                                                       | K04093 | METABOLISM                         |
| PA3166 | pheA  | chorismate mutase                                               | 0        | 21172882  | 1000     | COG1605 | E | Chorismate mutase                                                       | K14187 | METABOLISM                         |
| PA3166 | pheA  | chorismate mutase                                               | 0        | 21172882  | 1000     | COG1605 | E | Chorismate mutase                                                       | K01850 | METABOLISM                         |
| PA3166 | pheA  | chorismate mutase                                               | 0        | 21172882  | 1000     | COG1605 | E | Chorismate mutase                                                       | K04092 | METABOLISM                         |
| PA3166 | pheA  | chorismate mutase                                               | 0        | 21172882  | 1000     | COG1605 | E | Chorismate mutase                                                       | K13853 | METABOLISM                         |
| PA3171 | ubiG  | 3-demethylubiquinone-9 3-methyltransferase                      | 71352383 | 59238994  | 0.830231 | COG2227 | H | "2-polyprenyl-3-methyl-5-hydroxy-6-methoxy-1,4-benzoquinol              | K00568 | METABOLISM                         |
| PA3171 | ubiG  | 3-demethylubiquinone-9 3-methyltransferase                      | 71352383 | 59238994  | 0.830231 | COG2227 | H | "2-polyprenyl-3-methyl-5-hydroxy-6-methoxy-1,4-benzoquinol              | K03428 | METABOLISM                         |
| PA3172 |       | probable hydrolase                                              | 55431859 | 0         | 0        | COG0546 | R | Predicted phosphatases                                                  | K10191 | POORLY CHARACTERIZED               |
| PA3186 | oprB  | Glucose/carbohydrate outer membrane porin OprB precursor        | 0        | 1.07E+08  | 1000     | COG3659 | M | Carbohydrate-selective porin                                            | K07267 | CELLULAR PROCESSES AND SIGNALING   |
| PA3190 |       | probable binding protein component of ABC sugar transporter     | 5.92E+08 | 2.78E+08  | 0.468793 | COG1653 | G | "ABC-type sugar transport system, periplasmic component"                | K02027 | METABOLISM                         |
| PA3190 |       | probable binding protein component of ABC sugar transporter     | 5.92E+08 | 2.78E+08  | 0.468793 | COG1653 | G | "ABC-type sugar transport system, periplasmic component"                | K05813 | METABOLISM                         |
| PA3194 | edd   | phosphogluconate dehydratase                                    | 24552837 | 93528455  | 3.809273 | COG0129 | G | Dihydroxyacid dehydratase/phosphogluconate dehydratase                  | K01687 | METABOLISM                         |
| PA3194 | edd   | phosphogluconate dehydratase                                    | 24552837 | 93528455  | 3.809273 | COG0129 | G | Dihydroxyacid dehydratase/phosphogluconate dehydratase                  | K01690 | METABOLISM                         |
| PA3194 | edd   | phosphogluconate dehydratase                                    | 24552837 | 93528455  | 3.809273 | COG0129 | G | Dihydroxyacid dehydratase/phosphogluconate dehydratase                  | K01690 | METABOLISM                         |
| PA3194 | edd   | phosphogluconate dehydratase                                    | 24552837 | 93528455  | 3.809273 | COG0129 | G | Dihydroxyacid dehydratase/phosphogluconate dehydratase                  | K01687 | METABOLISM                         |
| PA3202 |       | conserved hypothetical protein                                  | 59972792 | 1.55E+08  | 2.588321 | COG2350 | S | Uncharacterized protein conserved in bacteria                           | K09780 | POORLY CHARACTERIZED               |
| PA3205 |       | hypothetical protein                                            | 0        | 1.61E+08  | 1000     | COG3678 | P | "Pilus assembly/Cpx signaling pathway, periplasmic inhibitor;/K07803    |        | METABOLISM                         |
| PA3205 |       | hypothetical protein                                            | 0        | 1.61E+08  | 1000     | COG3678 | N | "Pilus assembly/Cpx signaling pathway, periplasmic inhibitor;/K06006    |        | CELLULAR PROCESSES AND SIGNALING   |
| PA3205 |       | hypothetical protein                                            | 0        | 1.61E+08  | 1000     | COG3678 | U | "Pilus assembly/Cpx signaling pathway, periplasmic inhibitor;/K07803    |        | CELLULAR PROCESSES AND SIGNALING   |
| PA3205 |       | hypothetical protein                                            | 0        | 1.61E+08  | 1000     | COG3678 | N | "Pilus assembly/Cpx signaling pathway, periplasmic inhibitor;/K07803    |        | CELLULAR PROCESSES AND SIGNALING   |
| PA3205 |       | hypothetical protein                                            | 0        | 1.61E+08  | 1000     | COG3678 | U | "Pilus assembly/Cpx signaling pathway, periplasmic inhibitor;/K06006    |        | CELLULAR PROCESSES AND SIGNALING   |
| PA3205 |       | hypothetical protein                                            | 0        | 1.61E+08  | 1000     | COG3678 | P | "Pilus assembly/Cpx signaling pathway, periplasmic inhibitor;/K06006    |        | METABOLISM                         |
| PA3205 |       | hypothetical protein                                            | 0        | 1.61E+08  | 1000     | COG3678 | T | "Pilus assembly/Cpx signaling pathway, periplasmic inhibitor;/K06006    |        | CELLULAR PROCESSES AND SIGNALING   |
| PA3205 |       | hypothetical protein                                            | 0        | 1.61E+08  | 1000     | COG3678 | T | "Pilus assembly/Cpx signaling pathway, periplasmic inhibitor;/K07803    |        | CELLULAR PROCESSES AND SIGNALING   |
| PA3213 |       | hypothetical protein                                            | 12850246 | 0         | 0        | COG1463 | Q | "ABC-type transport system involved in resistance to organic ;K02067    |        | METABOLISM                         |
| PA3214 |       | hypothetical protein                                            | 96749987 | 56244321  | 0.581337 |         |   |                                                                         |        |                                    |
| PA3227 | ppiA  | peptidyl-prolyl cis-trans isomerase A                           | 3.11E+08 | 2.59E+08  | 0.833482 | COG0652 | O | Peptidyl-prolyl cis-trans isomerase (rotamase) - cyclophilin far/K03768 |        | CELLULAR PROCESSES AND SIGNALING   |
| PA3227 | ppiA  | peptidyl-prolyl cis-trans isomerase A                           | 3.11E+08 | 2.59E+08  | 0.833482 | COG0652 | O | Peptidyl-prolyl cis-trans isomerase (rotamase) - cyclophilin far/K03768 |        | CELLULAR PROCESSES AND SIGNALING   |
| PA3227 | ppiA  | peptidyl-prolyl cis-trans isomerase A                           | 3.11E+08 | 2.59E+08  | 0.833482 | COG0652 | O | Peptidyl-prolyl cis-trans isomerase (rotamase) - cyclophilin far/K03768 |        | CELLULAR PROCESSES AND SIGNALING   |
| PA3244 | minD  | cell division inhibitor MinD                                    | 36262041 | 4.58E+08  | 12.62021 | COG2894 | D | Septum formation inhibitor-activating ATPase                            | K03609 | CELLULAR PROCESSES AND SIGNALING   |
| PA3245 | minE  | cell division topological specificity factor MinE               | 2.04E+09 | 4.11E+08  | 0.201214 | COG0811 | D | Septum formation topological specificity factor                         | K03608 | CELLULAR PROCESSES AND SIGNALING   |
| PA3262 |       | "probable peptidyl-prolyl cis-trans isomerase                   | 1.67E+10 | 1.11E+10  | 0.663046 | COG0545 | O | FKBP-type peptidyl-prolyl cis-trans isomerases 1                        | K03772 | CELLULAR PROCESSES AND SIGNALING   |
| PA3262 |       | "probable peptidyl-prolyl cis-trans isomerase                   | 1.67E+10 | 1.11E+10  | 0.663046 | COG0545 | O | FKBP-type peptidyl-prolyl cis-trans isomerases 1                        | K03773 | CELLULAR PROCESSES AND SIGNALING   |
| PA3262 |       | "probable peptidyl-prolyl cis-trans isomerase                   | 1.67E+10 | 1.11E+10  | 0.663046 | COG0545 | O | FKBP-type peptidyl-prolyl cis-trans isomerases 1                        | K09575 | CELLULAR PROCESSES AND SIGNALING   |
| PA3262 |       | "probable peptidyl-prolyl cis-trans isomerase                   | 1.67E+10 | 1.11E+10  | 0.663046 | COG0545 | O | FKBP-type peptidyl-prolyl cis-trans isomerases 1                        | K01802 | CELLULAR PROCESSES AND SIGNALING   |
| PA3263 |       | conserved hypothetical protein                                  | 0        | 5.1112833 | 1000     | COG2974 | L | DNA recombination-dependent growth factor C                             | K03554 | INFORMATION STORAGE AND PROCESSING |
| PA3264 |       | probable transporter                                            | 0        | 8.6277767 | 1000     | COG0385 | R | Predicted Na+dependent transporter                                      | K03453 | POORLY CHARACTERIZED               |
| PA3266 | capB  | cold acclimation protein B                                      | 1.12E+10 | 8.98E+09  | 0.803197 | COG1278 | K | Cold shock proteins                                                     | K03704 | INFORMATION STORAGE AND PROCESSING |
| PA3302 |       | conserved hypothetical protein                                  | 1.74E+08 | 0         | 0        |         |   |                                                                         |        |                                    |
| PA3309 |       | conserved hypothetical protein                                  | 1.47E+10 | 6.08E+09  | 0.413043 | COG0589 | T | Universal stress protein UspA and related nucleotide-binding ;K06149    |        | CELLULAR PROCESSES AND SIGNALING   |
| PA3313 |       | hypothetical protein                                            | 26062906 | 41124770  | 1.577904 | COG3221 | P | "ABC-type phosphate/phosphonate transport system, peripla;K02044        |        | METABOLISM                         |
| PA3326 | clpP2 | ClpP2                                                           | 4.38E+08 | 2.47E+08  | 0.565238 | COG0740 | O | Protease subunit of ATP-dependent Clp proteases                         | K01358 | CELLULAR PROCESSES AND SIGNALING   |
| PA3326 | clpP2 | ClpP2                                                           | 4.38E+08 | 2.47E+08  | 0.565238 | COG0740 | O | Protease subunit of ATP-dependent Clp proteases                         | K01358 | CELLULAR PROCESSES AND SIGNALING   |
| PA3330 |       | probable short chain dehydrogenase                              | 14706552 | 0         | 0        | COG1028 | R | Dehydrogenases with different specificities (related to short-c ;K00059 |        | POORLY CHARACTERIZED               |
| PA3330 |       | probable short chain dehydrogenase                              | 14706552 | 0         | 0        | COG1028 | I | Dehydrogenases with different specificities (related to short-c ;K00059 |        | METABOLISM                         |
| PA3330 |       | probable short chain dehydrogenase                              | 14706552 | 0         | 0        | COG1028 | I | Dehydrogenases with different specificities (related to short-c ;K00059 |        | METABOLISM                         |
| PA3341 |       | probable transcriptional regulator                              | 62821958 | 1.4E+08   | 2.226162 | COG1846 | K | Transcriptional regulators                                              | K03712 | INFORMATION STORAGE AND PROCESSING |
| PA3347 | hsbA  | HTB-dependent secretion and biofilm anti anti-sigma factor HsbA | 1.59E+08 | 1.85E+08  | 1.166461 | COG1366 | T | Anti-anti-sigma regulatory factor (antagonist of anti-sigma fac ;K06378 |        | CELLULAR PROCESSES AND SIGNALING   |
| PA3347 | hsbA  | HTB-dependent secretion and biofilm anti anti-sigma factor HsbA | 1.59E+08 | 1.85E+08  | 1.166461 | COG1366 | T | Anti-anti-sigma regulatory factor (antagonist of anti-sigma fac ;K06378 |        | CELLULAR PROCESSES AND SIGNALING   |
| PA3351 | flgM  | FlgM                                                            | 6.02E+08 | 2.65E+08  | 0.440457 | COG2747 | K | Negative regulator of flagellin synthesis (anti-sigma28 factor) ;K02398 |        | INFORMATION STORAGE AND PROCESSING |
| PA3351 | flgM  | FlgM                                                            | 6.02E+08 | 2.65E+08  | 0.440457 | COG2747 | K | Negative regulator of flagellin synthesis (anti-sigma28 factor) ;K02398 |        | INFORMATION STORAGE AND PROCESSING |
| PA3351 | flgM  | FlgM                                                            | 6.02E+08 | 2.65E+08  | 0.440457 | COG2747 | N | Negative regulator of flagellin synthesis (anti-sigma28 factor) ;K02398 |        | CELLULAR PROCESSES AND SIGNALING   |
| PA3351 | flgM  | FlgM                                                            | 6.02E+08 | 2.65E+08  | 0.440457 | COG2747 | N | Negative regulator of flagellin synthesis (anti-sigma28 factor) ;K02398 |        | CELLULAR PROCESSES AND SIGNALING   |
| PA3352 |       | hypothetical protein                                            | 5.05E+08 | 2.17E+09  | 4.297886 |         |   |                                                                         |        |                                    |
| PA3378 |       | conserved hypothetical protein                                  | 0        | 4.7502093 | 1000     | COG3626 | P | Uncharacterized enzyme of phosphonate metabolism                        | K06164 | METABOLISM                         |
| PA3385 | amrZ  | alginate and motility regulator Z                               | 6.76E+08 | 1.99E+08  | 0.294851 |         |   |                                                                         |        |                                    |
| PA3392 | nosZ  | nitrous-oxide reductase precursor                               | 0        | 3E+08     | 1000     | COG4263 | C | Nitrous oxide reductase                                                 | K00376 | METABOLISM                         |
| PA3413 |       | conserved hypothetical protein                                  | 3.37E+08 | 1.19E+08  | 0.35245  | COG3141 | S | Uncharacterized protein conserved in bacteria                           | K09918 | POORLY CHARACTERIZED               |
| PA3424 |       | hypothetical protein                                            | 63567340 | 0         | 0        | COG0665 | E | Glycine/D-amino acid oxidases (deaminating)                             | K00303 | METABOLISM                         |
| PA3424 |       | hypothetical protein                                            | 63567340 | 0         | 0        | COG0665 | E | Glycine/D-amino acid oxidases (deaminating)                             | K00285 | METABOLISM                         |
| PA3424 |       | hypothetical protein                                            | 63567340 | 0         | 0        | COG0665 | E | Glycine/D-amino acid oxidases (deaminating)                             | K03153 | METABOLISM                         |
| PA3435 |       | conserved hypothetical protein                                  | 2.3E+08  | 1.48E+08  | 0.642493 | COG0716 | C | Flavodoxins                                                             | K03839 | METABOLISM                         |
| PA3435 |       | conserved hypothetical protein                                  | 2.3E+08  | 1.48E+08  | 0.642493 | COG0716 | C | Flavodoxins                                                             | K03840 | METABOLISM                         |
| PA3435 |       | conserved hypothetical protein                                  | 2.3E+08  | 1.48E+08  | 0.642493 | COG0716 | C | Flavodoxins                                                             | K06205 | METABOLISM                         |
| PA3440 |       | probable molybdopterin-binding protein                          | 62703626 | 0         | 0        | COG3492 | S | Uncharacterized protein conserved in bacteria                           | K09948 | POORLY CHARACTERIZED               |
| PA3441 |       |                                                                 | 0        | 7.6128761 | 1000     |         |   |                                                                         |        |                                    |
| PA3452 | mqoA  | malate:quinone oxidoreductase                                   | 33561594 | 1.5E+08   | 4.465369 | COG0579 | R | Predicted dehydrogenase                                                 | K00111 | POORLY CHARACTERIZED               |
| PA3452 | mqoA  | malate:quinone oxidoreductase                                   | 33561594 | 1.5E+08   | 4.465369 | COG0579 | R | Predicted dehydrogenase                                                 | K00116 | POORLY CHARACTERIZED               |
| PA3453 |       | conserved hypothetical protein                                  | 2.24E+08 | 39697968  | 0.176908 | COG3132 | S | Uncharacterized protein conserved in bacteria                           | K03810 | POORLY CHARACTERIZED               |
| PA3453 |       | conserved hypothetical protein                                  | 2.24E+08 | 39697968  | 0.176908 | COG3132 | S | Uncharacterized protein conserved in bacteria                           | K09915 | POORLY CHARACTERIZED               |
| PA3458 |       | probable transcriptional regulator                              | 39246430 | 0         | 0        | COG1846 | K | Transcriptional regulators                                              | K03712 | INFORMATION STORAGE AND PROCESSING |
| PA3470 |       | hypothetical protein                                            | 0        | 50476592  | 1000     | COG0494 | R | NTP pyrophosphohydrolases including oxidative damage repa ;K03574       |        | POORLY CHARACTERIZED               |
| PA3470 |       | hypothetical protein                                            | 0        | 50476592  | 1000     | COG0494 | L | NTP pyrophosphohydrolases including oxidative damage repa ;K01515       |        | INFORMATION STORAGE AND PROCESSING |
| PA3470 |       | hypothetical protein                                            | 0        | 50476592  | 1000     | COG0494 | R | NTP pyrophosphohydrolases including oxidative damage repa ;K01515       |        | POORLY CHARACTERIZED               |
| PA3470 |       | hypothetical protein                                            | 0        | 50476592  | 1000     | COG0494 | L | NTP pyrophosphohydrolases including oxidative damage repa ;K03811       |        | INFORMATION STORAGE AND PROCESSING |
| PA3470 |       | hypothetical protein                                            | 0        | 50476592  | 1000     | COG0494 | L | NTP pyrophosphohydrolases including oxidative damage repa ;K03574       |        | INFORMATION STORAGE AND PROCESSING |
| PA3470 |       | hypothetical protein                                            | 0        | 50476592  | 1000     | COG0494 | R | NTP pyrophosphohydrolases including oxidative damage repa ;K03811       |        | POORLY CHARACTERIZED               |
| PA3482 | metG  | methionyl-tRNA synthetase                                       | 0        | 15240747  | 1000     | COG0073 | R | EMAP domain                                                             | K01890 | POORLY CHARACTERIZED               |
| PA3482 | metG  | methionyl-tRNA synthetase                                       | 0        | 15240747  | 1000     | COG0143 | J | Methionyl-tRNA synthetase                                               | K01874 | INFORMATION STORAGE AND PROCESSING |
| PA3482 | metG  | methionyl-tRNA synthetase                                       | 0        | 15240747  | 1000     | COG0073 | R | EMAP domain                                                             | K06878 | POORLY CHARACTERIZED               |
| PA3482 | metG  | methionyl-tRNA synthetase                                       | 0        | 15240747  | 1000     | COG0073 | R | EMAP domain                                                             | K01874 | POORLY CHARACTERIZED               |
| PA3496 |       | hypothetical protein                                            | 1.91E+08 | 1.34E+08  | 0.700394 |         |   |                                                                         |        |                                    |
| PA3520 |       | hypothetical protein                                            | 59609396 | 1.27E+08  | 2.125457 | COG2608 | P | Copper chaperone                                                        | K08364 | METABOLISM                         |
| PA3520 |       | hypothetical protein                                            | 59609396 | 1.27E+08  | 2.125457 | COG2608 | P | Copper chaperone                                                        | K07213 | METABOLISM                         |
| PA3525 | argG  | argininosuccinate synthase                                      | 22160553 | 2.51E+08  | 11.34411 | COG0137 | E | Argininosuccinate synthase                                              | K01940 | METABOLISM                         |
| PA3529 |       | alkylhydroperoxide reductase C                                  | 1.27E+09 | 5.08E+09  | 3.994497 | COG0450 | O | Peroxiredoxin                                                           | K03386 | CELLULAR PROCESSES AND SIGNALING   |
| PA3531 | bfrB  | bacterioferritin                                                | 2.91E+09 | 2.77E+09  | 0.953468 | COG2193 | P | Bacterioferritin (cytochrome b1)                                        | K03594 | METABOLISM                         |
| PA3533 | grxD  | GnxD                                                            | 1.21E+09 | 5.08E+08  | 0.420679 | COG0278 | O | Glutaredoxin-related protein                                            | K07390 | CELLULAR PROCESSES AND SIGNALING   |
| PA3535 |       | probable serine protease                                        | 0        | 1.03E+08  | 1000     | COG1404 | O | Subtilisin-like serine proteases                                        | K01362 | CELLULAR PROCESSES AND SIGNALING   |
| PA3535 |       | probable serine protease                                        | 0        | 1.03E+08  | 1000     | COG4625 | S | Uncharacterized protein with a C-terminal OMP [outer memb ;K12685       |        | POORLY CHARACTERIZED               |
| PA3561 | fruk  | 1-phosphofructokinase                                           | 0        | 58266564  | 1000     | G11105  | G | Fructose-1-phosphate kinase and related fructose-6-phosphat ;K00917     |        | METABOLISM                         |
| PA3561 | fruk  | 1-phosphofructokinase                                           | 0        | 58266564  | 1000     | G11105  | G | Fructose-1-phosphate kinase and related fructose-6-phosphat ;K00882     |        | METABOLISM                         |
| PA3561 | fruk  | 1-phosphofructokinase                                           | 0        | 58266564  | 1000     | G11105  | G | Fructose-1-phosphate kinase and related fructose-6-phosphat ;K00850     |        | METABOLISM                         |
| PA3562 | frui  | "phosphotransferase system transporter enzyme I                 | 2.5E+08  | 73648682  | 0.294729 | COG1925 | G | "Phosphotransferase system, HPr-related proteins"                       | K02784 | METABOLISM                         |
| PA3562 | frui  | "phosphotransferase system transporter enzyme I                 | 2.5E+08  | 73648682  | 0.294729 | COG1080 | G |                                                                         |        |                                    |



|        |                                           |          |          |          |         |   |                                                                  |        |                                    |
|--------|-------------------------------------------|----------|----------|----------|---------|---|------------------------------------------------------------------|--------|------------------------------------|
| PA3580 | conserved hypothetical protein            | 0        | 22480144 | 1000     | COG2606 | S | Uncharacterized conserved protein                                | K03976 | POORLY CHARACTERIZED               |
| PA3592 | conserved hypothetical protein            | 24681893 | 0        | 0        | COG1804 | C | Predicted acyl-CoA transferases/carnitine dehydratase            | K01796 | METABOLISM                         |
| PA3592 | conserved hypothetical protein            | 24681893 | 0        | 0        | COG1804 | C | Predicted acyl-CoA transferases/carnitine dehydratase            | K07749 | METABOLISM                         |
| PA3601 | conserved hypothetical protein            | 57306665 | 1.33E+08 | 2.31374  | COG0254 | J | Ribosomal protein L31                                            | K02909 | INFORMATION STORAGE AND PROCESSING |
| PA3602 | conserved hypothetical protein            | 0        | 10273770 | 1000     | COG0069 | E | Glutamate synthase domain 2                                      | K00265 | METABOLISM                         |
| PA3602 | conserved hypothetical protein            | 0        | 10273770 | 1000     | COG0069 | E | Glutamate synthase domain 2                                      | K00284 | METABOLISM                         |
| PA3611 | hypothetical protein                      | 74803396 | 87957800 | 1.175853 |         |   |                                                                  |        |                                    |
| PA3617 | recA protein                              | 1.15E+08 | 19263705 | 0.166855 | COG0468 | L | RecA/RadA recombinase                                            | K03553 | INFORMATION STORAGE AND PROCESSING |
| PA3617 | recA protein                              | 1.15E+08 | 19263705 | 0.166855 | COG0468 | L | RecA/RadA recombinase                                            | K04483 | INFORMATION STORAGE AND PROCESSING |
| PA3621 | ferredoxin I                              | 1.54E+09 | 4.74E+08 | 0.307174 | COG1146 | C | Ferredoxin                                                       | K00176 | METABOLISM                         |
| PA3621 | ferredoxin I                              | 1.54E+09 | 4.74E+08 | 0.307174 | COG1146 | C | Ferredoxin                                                       | K05524 | METABOLISM                         |
| PA3623 | conserved hypothetical protein            | 0        | 54631284 | 1000     | COG1388 | M | FOG: LysM repeat                                                 | K01448 | CELLULAR PROCESSES AND SIGNALING   |
| PA3632 | conserved hypothetical protein            | 28495140 | 24727315 | 0.867773 | COG0425 | O | "Predicted redox protein, regulator of disulfide bond formatio   | K04089 | CELLULAR PROCESSES AND SIGNALING   |
| PA3635 | enolase                                   | 1.73E+10 | 8.08E+09 | 0.467164 | COG0148 | G | Enolase                                                          | K01685 | METABOLISM                         |
| PA3636 | kdsA                                      | 0        | 9713513  | 1000     | COG2877 | M | 3-deoxy-D-manno-octulosonic acid (KDO) 8-phosphate syntha        | K01627 | CELLULAR PROCESSES AND SIGNALING   |
| PA3639 | accA                                      | 0        | 52949293 | 1000     | COG0825 | I | Acetyl-CoA carboxylase alpha subunit                             | K01963 | METABOLISM                         |
| PA3639 | accA                                      | 0        | 52949293 | 1000     | COG0825 | I | Acetyl-CoA carboxylase alpha subunit                             | K01962 | METABOLISM                         |
| PA3647 | probable outer membrane protein precursor | 6.36E+09 | 7.31E+09 | 1.150069 | COG2825 | M | Outer membrane protein                                           | K06142 | CELLULAR PROCESSES AND SIGNALING   |
| PA3653 | frf                                       | 1.12E+10 | 7.68E+09 | 0.683803 | COG0233 | J | Ribosome recycling factor                                        | K02838 | INFORMATION STORAGE AND PROCESSING |
| PA3654 | pyrH                                      | 0        | 26470581 | 1000     | COG0528 | F | Uridylate kinase                                                 | K09903 | METABOLISM                         |
| PA3655 | tsf                                       | 2.72E+09 | 4.68E+09 | 1.720306 | COG0264 | J | Translation elongation factor Ts                                 | K02357 | INFORMATION STORAGE AND PROCESSING |
| PA3656 | rpsB                                      | 3.84E+09 | 4.86E+09 | 1.264095 | COG0052 | J | Ribosomal protein S2                                             | K02967 | INFORMATION STORAGE AND PROCESSING |
| PA3657 | map                                       | 59624232 | 2.4E+08  | 4.025924 | COG0024 | J | Methionine aminopeptidase                                        | K01265 | INFORMATION STORAGE AND PROCESSING |
| PA3664 | conserved hypothetical protein            | 1.91E+08 | 0        | 0        | COG1393 | P | "Arsenate reductase and related proteins, glutaredoxin family    | K00537 | METABOLISM                         |
| PA3675 | hypothetical protein                      | 46621960 | 1.22E+08 | 2.610322 |         |   |                                                                  |        |                                    |
| PA3678 | mexL                                      | 1.36E+08 | 1.01E+08 | 0.744297 |         |   |                                                                  |        |                                    |
| PA3686 | adk                                       | 8.28E+09 | 3.7E+09  | 0.446546 | COG0563 | F | Adenylate kinase and related kinases                             | K00939 | METABOLISM                         |
| PA3688 | hypothetical protein                      | 8.03E+08 | 1.43E+08 | 0.177959 |         |   |                                                                  |        |                                    |
| PA3691 | hypothetical protein                      | 1.35E+10 | 7.68E+09 | 0.567961 |         |   |                                                                  |        |                                    |
| PA3692 | lptF                                      | 2.08E+10 | 7.16E+09 | 0.343562 | COG2885 | M | Outer membrane protein and related peptidoglycan-associate       | K03286 | CELLULAR PROCESSES AND SIGNALING   |
| PA3692 | lptF                                      | 2.08E+10 | 7.16E+09 | 0.343562 | COG2885 | M | Outer membrane protein and related peptidoglycan-associate       | K03640 | CELLULAR PROCESSES AND SIGNALING   |
| PA3694 | hypothetical protein                      | 4.59E+08 | 3.69E+08 | 0.802985 |         |   |                                                                  |        |                                    |
| PA3700 | lysS                                      | 0        | 1.27E+08 | 1000     | COG1190 | J | Lysyl-tRNA synthetase (class II)                                 | K04567 | INFORMATION STORAGE AND PROCESSING |
| PA3701 | peptide chain release factor 2(prfB)      | 6.64E+08 | 0        | 0        |         |   |                                                                  |        |                                    |
| PA3701 | peptide chain release factor 2(prfB)      | 31343769 | 0        | 0        |         |   |                                                                  |        |                                    |
| PA3708 | wspA                                      | 1.01E+09 | 4.52E+08 | 0.448482 | COG0840 | N | Methyl-accepting chemotaxis protein                              | K03406 | CELLULAR PROCESSES AND SIGNALING   |
| PA3708 | wspA                                      | 1.01E+09 | 4.52E+08 | 0.448482 | COG0840 | T | Methyl-accepting chemotaxis protein                              | K03406 | CELLULAR PROCESSES AND SIGNALING   |
| PA3712 | hypothetical protein                      | 1.27E+08 | 4.26E+08 | 3.350091 |         |   |                                                                  |        |                                    |
| PA3716 | hypothetical protein                      | 1.39E+08 | 1.96E+08 | 1.408854 |         |   |                                                                  |        |                                    |
| PA3729 | conserved hypothetical protein            | 7.13E+08 | 6.51E+08 | 0.91363  | COG2268 | S | Uncharacterized protein conserved in bacteria                    | K07192 | POORLY CHARACTERIZED               |
| PA3731 | conserved hypothetical protein            | 1.48E+09 | 3.91E+08 | 0.263703 | COG1842 | K | "Phage shock protein A (IM30), suppresses sigma54-depende        | K03969 | INFORMATION STORAGE AND PROCESSING |
| PA3731 | conserved hypothetical protein            | 1.48E+09 | 3.91E+08 | 0.263703 | COG1842 | T | "Phage shock protein A (IM30), suppresses sigma54-depende        | K03969 | CELLULAR PROCESSES AND SIGNALING   |
| PA3735 | thrC                                      | 2.65E+08 | 4.44E+08 | 1.674996 | COG0498 | E | Threonine synthase                                               | K01733 | METABOLISM                         |
| PA3736 | hom                                       | 9774517  | 23722366 | 2.42696  | COG0317 | K | Guanosine polyphosphate pyrophosphohydrolases/synthetasa         | K01139 | INFORMATION STORAGE AND PROCESSING |
| PA3736 | hom                                       | 9774517  | 23722366 | 2.42696  | COG0317 | T | Guanosine polyphosphate pyrophosphohydrolases/synthetasa         | K01139 | CELLULAR PROCESSES AND SIGNALING   |
| PA3736 | hom                                       | 9774517  | 23722366 | 2.42696  | COG0460 | E | Homoserine dehydrogenase                                         | K12525 | METABOLISM                         |
| PA3736 | hom                                       | 9774517  | 23722366 | 2.42696  | COG0460 | E | Homoserine dehydrogenase                                         | K00003 | METABOLISM                         |
| PA3736 | hom                                       | 9774517  | 23722366 | 2.42696  | COG0317 | T | Guanosine polyphosphate pyrophosphohydrolases/synthetasa         | K00951 | CELLULAR PROCESSES AND SIGNALING   |
| PA3736 | hom                                       | 9774517  | 23722366 | 2.42696  | COG0317 | K | Guanosine polyphosphate pyrophosphohydrolases/synthetasa         | K00951 | INFORMATION STORAGE AND PROCESSING |
| PA3736 | hom                                       | 9774517  | 23722366 | 2.42696  | COG0460 | E | Homoserine dehydrogenase                                         | K12524 | METABOLISM                         |
| PA3742 | rplS                                      | 0        | 36603930 | 1000     | COG0335 | J | Ribosomal protein L19                                            | K02884 | INFORMATION STORAGE AND PROCESSING |
| PA3745 | rpsP                                      | 7.63E+08 | 1.18E+09 | 1.548114 | COG0228 | J | Ribosomal protein S16                                            | K02959 | INFORMATION STORAGE AND PROCESSING |
| PA3746 | fhf                                       | 1.1E+09  | 4.23E+08 | 0.383312 | COG0541 | U | Signal recognition particle GTPase                               | K03106 | CELLULAR PROCESSES AND SIGNALING   |
| PA3753 | conserved hypothetical protein            | 6.33E+08 | 5.44E+08 | 0.859274 | COG0663 | R | "Carbonic anhydrases/acetyltransferases, isoleucine patch su     | K00879 | POORLY CHARACTERIZED               |
| PA3765 | hypothetical protein                      | 52010787 | 0        | 0        | COG3644 | S | Uncharacterized protein conserved in bacteria                    | K09965 | POORLY CHARACTERIZED               |
| PA3770 | guaB                                      | 0        | 3.52E+08 | 1000     | COG2070 | R | Dioxygenases related to 2-nitropropane dioxygenase               | K02371 | POORLY CHARACTERIZED               |
| PA3770 | guaB                                      | 0        | 3.52E+08 | 1000     | COG0517 | R | FOG: CBS domain                                                  | K00088 | POORLY CHARACTERIZED               |
| PA3770 | guaB                                      | 0        | 3.52E+08 | 1000     | COG0516 | F | IMP dehydrogenase/GMP reductase                                  | K00364 | METABOLISM                         |
| PA3770 | guaB                                      | 0        | 3.52E+08 | 1000     | COG2070 | R | Dioxygenases related to 2-nitropropane dioxygenase               | K00459 | POORLY CHARACTERIZED               |
| PA3770 | guaB                                      | 0        | 3.52E+08 | 1000     | COG0516 | F | IMP dehydrogenase/GMP reductase                                  | K00088 | METABOLISM                         |
| PA3770 | guaB                                      | 0        | 3.52E+08 | 1000     | COG0517 | R | FOG: CBS domain                                                  | K06041 | POORLY CHARACTERIZED               |
| PA3785 | conserved hypothetical protein            | 3.26E+09 | 4.64E+09 | 1.421367 | COG2847 | S | Uncharacterized protein conserved in bacteria                    | K09796 | POORLY CHARACTERIZED               |
| PA3790 | oprC                                      | 4.05E+08 | 5.1E+08  | 1.257714 | COG1629 | P | "Outer membrane receptor proteins, mostly Fe transport"          | K02014 | METABOLISM                         |
| PA3790 | oprC                                      | 4.05E+08 | 5.1E+08  | 1.257714 | COG4774 | P | Outer membrane receptor for monomeric catechols                  | K02014 | METABOLISM                         |
| PA3801 | conserved hypothetical protein            | 1.08E+09 | 1.49E+09 | 1.381999 |         |   |                                                                  |        |                                    |
| PA3803 | gcpE                                      | 0        | 52338495 | 1000     | COG0821 | I | Enzyme involved in the deoxyxylulose pathway of isoprenoid       | K03526 | METABOLISM                         |
| PA3804 | hypothetical protein                      | 1.78E+09 | 2.01E+08 | 0.113134 |         |   |                                                                  |        |                                    |
| PA3805 | pilF                                      | 3.07E+08 | 1.71E+08 | 0.557028 | COG3063 | U | Tfp pilus assembly protein PilF                                  | K02656 | CELLULAR PROCESSES AND SIGNALING   |
| PA3805 | pilF                                      | 3.07E+08 | 1.71E+08 | 0.557028 | COG3063 | N | Tfp pilus assembly protein PilF                                  | K02656 | CELLULAR PROCESSES AND SIGNALING   |
| PA3807 | ndk                                       | 1.1E+10  | 1.11E+10 | 1.009651 | COG1005 | F | Nucleoside diphosphate kinase                                    | K00940 | METABOLISM                         |
| PA3809 | fdx2                                      | 1.27E+08 | 1.34E+08 | 1.049646 | COG0633 | C | Ferredoxin                                                       | K11107 | METABOLISM                         |
| PA3809 | fdx2                                      | 1.27E+08 | 1.34E+08 | 1.049646 | COG0633 | C | Ferredoxin                                                       | K04755 | METABOLISM                         |
| PA3809 | fdx2                                      | 1.27E+08 | 1.34E+08 | 1.049646 | COG0633 | C | Ferredoxin                                                       | K02639 | METABOLISM                         |
| PA3812 | iscA                                      | 55582902 | 0        | 0        | COG0316 | S | Uncharacterized/conserved protein                                | K07400 | POORLY CHARACTERIZED               |
| PA3816 | iscA                                      | 55582902 | 0        | 0        | COG0316 | S | Uncharacterized/conserved protein                                | K13628 | POORLY CHARACTERIZED               |
| PA3813 | iscU                                      | 3.03E+09 | 2.19E+09 | 0.72219  | COG0822 | C | NiFU homolog involved in Fe-S cluster formation                  | K13819 | METABOLISM                         |
| PA3813 | iscU                                      | 3.03E+09 | 2.19E+09 | 0.72219  | COG0822 | C | NiFU homolog involved in Fe-S cluster formation                  | K04488 | METABOLISM                         |
| PA3814 | iscS                                      | 0        | 42560153 | 1000     | COG1104 | E | Cysteine sulfinate desulfurase/cysteine desulfurase and relate   | K04487 | METABOLISM                         |
| PA3816 | cysE                                      | 4.35E+08 | 82499156 | 0.189766 | COG1045 | E | Serine acetyltransferase                                         | K00640 | METABOLISM                         |
| PA3819 | conserved hypothetical protein            | 17836174 | 29740168 | 1.667407 | COG3134 | S | Predicted outer membrane lipoprotein                             | K06077 | POORLY CHARACTERIZED               |
| PA3821 | secD                                      | 11313275 | 0        | 0        | COG0342 | U | Preprotein translocase subunit SecD                              | K03072 | CELLULAR PROCESSES AND SIGNALING   |
| PA3821 | secD                                      | 11313275 | 0        | 0        | COG0342 | U | Preprotein translocase subunit SecD                              | K12257 | CELLULAR PROCESSES AND SIGNALING   |
| PA3822 | conserved hypothetical protein            | 1.77E+08 | 2.92E+08 | 1.649228 | COG1862 | U | Preprotein translocase subunit YajC                              | K03210 | CELLULAR PROCESSES AND SIGNALING   |
| PA3831 | pepA                                      | 12598658 | 0        | 0        | COG0260 | E | Leucyl aminopeptidase                                            | K01255 | METABOLISM                         |
| PA3831 | pepA                                      | 12598658 | 0        | 0        | COG0260 | E | Leucyl aminopeptidase                                            | K01775 | METABOLISM                         |
| PA3834 | valS                                      | 50132049 | 74806745 | 1.492194 | COG0525 | J | Valyl-tRNA synthetase                                            | K07831 | INFORMATION STORAGE AND PROCESSING |
| PA3836 | hypothetical protein                      | 3.01E+08 | 3.4E+08  | 1.130446 | COG2984 | R | "ABC-type uncharacterized transport system, periplasmic com      | K01989 | POORLY CHARACTERIZED               |
| PA3842 | spcS                                      | 0        | 59204411 | 1000     |         |   |                                                                  |        |                                    |
| PA3866 | Poycin S4                                 | 0        | 13679456 | 1000     |         |   |                                                                  |        |                                    |
| PA3901 | fecA                                      | 22137316 | 0        | 0        | COG4772 | P | Outer membrane receptor for Fe3+dicitrate                        | K02014 | METABOLISM                         |
| PA3902 | hypothetical protein                      | 0        | 30684743 | 1000     |         |   |                                                                  |        |                                    |
| PA3925 | probable acyl-CoA thiolase                | 0        | 24286794 | 1000     | COG0183 | I | Acetyl-CoA acetyltransferase                                     | K00632 | METABOLISM                         |
| PA3925 | probable acyl-CoA thiolase                | 0        | 24286794 | 1000     | COG0183 | I | Acetyl-CoA acetyltransferase                                     | K00626 | METABOLISM                         |
| PA3931 | conserved hypothetical protein            | 2.68E+08 | 19985612 | 7.46E-02 | COG1464 | P | "ABC-type metal ion transport system, periplasmic componen       | K02073 | METABOLISM                         |
| PA3940 | probable DNA binding protein              | 1.93E+10 | 1.3E+10  | 0.674546 | COG0776 | L | Bacterial nucleoid DNA-binding protein                           | K05788 | INFORMATION STORAGE AND PROCESSING |
| PA3940 | probable DNA binding protein              | 1.93E+10 | 1.3E+10  | 0.674546 | COG0776 | L | Bacterial nucleoid DNA-binding protein                           | K05787 | INFORMATION STORAGE AND PROCESSING |
| PA3940 | probable DNA binding protein              | 1.93E+10 | 1.3E+10  | 0.674546 | COG0776 | L | Bacterial nucleoid DNA-binding protein                           | K03530 | INFORMATION STORAGE AND PROCESSING |
| PA3940 | probable DNA binding protein              | 1.93E+10 | 1.3E+10  | 0.674546 | COG0776 | L | Bacterial nucleoid DNA-binding protein                           | K04764 | INFORMATION STORAGE AND PROCESSING |
| PA3942 | tesB                                      | 0        | 71840527 | 1000     | COG1946 | I | Acyl-CoA thioesterase                                            | K10805 | METABOLISM                         |
| PA3975 | thiD                                      | 45393420 | 38710634 | 0.852781 | COG0351 | H | Hydroxymethylpyrimidine/phosphomethylpyrimidine kinase           | K00941 | METABOLISM                         |
| PA3975 | thiD                                      | 45393420 | 38710634 | 0.852781 | COG0351 | H | Hydroxymethylpyrimidine/phosphomethylpyrimidine kinase           | K14153 | METABOLISM                         |
| PA3975 | thiD                                      | 45393420 | 38710634 | 0.852781 | COG0351 | H | Hydroxymethylpyrimidine/phosphomethylpyrimidine kinase           | K00868 | METABOLISM                         |
| PA3988 | lptE                                      | 5.76E+09 | 5.06E+09 | 0.877938 | COG2980 | M | Rare lipoprotein B                                               | K03643 | CELLULAR PROCESSES AND SIGNALING   |
| PA4005 | conserved hypothetical protein            | 7.29E+08 | 5.62E+08 | 0.770763 | COG0799 | S | Uncharacterized homolog of plant iojap protein                   | K09710 | POORLY CHARACTERIZED               |
| PA4007 | proA                                      | 11903772 | 34676084 | 2.913033 | COG0014 | E | Gamma-glutamyl phosphate reductase                               | K00147 | METABOLISM                         |
| PA4017 | conserved hypothetical protein            | 12447794 | 0        | 0        | COG0702 | G | Predicted nucleoside-diphosphate-sugar epimerases                | K00329 | METABOLISM                         |
| PA4017 | conserved hypothetical protein            | 12447794 | 0        | 0        | COG0702 | G | Predicted nucleoside-diphosphate-sugar epimerases                | K00356 | METABOLISM                         |
| PA4017 | conserved hypothetical protein            | 12447794 | 0        | 0        | COG0702 | M | Predicted nucleoside-diphosphate-sugar epimerases                | K00329 | CELLULAR PROCESSES AND SIGNALING   |
| PA4017 | conserved hypothetical protein            | 12447794 | 0        | 0        | COG0702 | M | Predicted nucleoside-diphosphate-sugar epimerases                | K00356 | CELLULAR PROCESSES AND SIGNALING   |
| PA4031 | ppa                                       | 7.7E+09  | 6.36E+09 | 0.825814 | COG0221 | C | Inorganic pyrophosphatase                                        | K01507 | METABOLISM                         |
| PA4042 | xseB                                      | 2.3E+08  | 1.79E+08 | 0.778075 | COG1722 | L | Exonuclease VII small subunit                                    | K03602 | INFORMATION STORAGE AND PROCESSING |
| PA4052 | nusB                                      | 2.18E+08 | 1.88E+08 | 0.863148 | COG0781 | K | Transcription termination factor                                 | K03625 | INFORMATION STORAGE AND PROCESSING |
| PA4054 | ribB                                      | 0        | 1.9E+08  | 1000     | COG0108 | H | "3,4-dihydroxy-2-butanone 4-phosphate synthase"                  | K01497 | METABOLISM                         |
| PA4054 | ribB                                      | 0        | 1.9E+08  | 1000     | COG0807 | H | GTP cyclohydrolase II                                            | K02858 | METABOLISM                         |
| PA4054 | ribB                                      | 0        | 1.9E+08  | 1000     | COG0807 | H | GTP cyclohydrolase II                                            | K01497 | METABOLISM                         |
| PA4054 | ribB                                      | 0        | 1.9E+08  | 1000     | COG0108 | H | "3,4-dihydroxy-2-butanone 4-phosphate synthase"                  | K02858 | METABOLISM                         |
| PA4057 | nrpR                                      | 70903456 | 0        | 0        | COG1327 | K | "Predicted transcriptional regulator, consists of a Zn-ribbon ar | K07738 | INFORMATION STORAGE AND PROCESSING |
| PA4061 | probable thioredoxin                      | 0        | 62874726 | 1000     | COG3118 | O | Thioredoxin domain-containing                                    |        |                                    |

|        |                                               |          |          |          |         |   |                                                                     |                      |                                    |
|--------|-----------------------------------------------|----------|----------|----------|---------|---|---------------------------------------------------------------------|----------------------|------------------------------------|
| PA4097 | probable alcohol dehydrogenase (Zn-dependent) | 0        | 14890980 | 1000     | COG1063 | E | Threonine dehydrogenase and related Zn-dependent dehydroK00060      | METABOLISM           |                                    |
| PA4097 | probable alcohol dehydrogenase (Zn-dependent) | 0        | 14890980 | 1000     | COG1063 | E | Threonine dehydrogenase and related Zn-dependent dehydroK00001      | METABOLISM           |                                    |
| PA4097 | probable alcohol dehydrogenase (Zn-dependent) | 0        | 14890980 | 1000     | COG1063 | R | Threonine dehydrogenase and related Zn-dependent dehydroK00001      | POORLY CHARACTERIZED |                                    |
| PA4097 | probable alcohol dehydrogenase (Zn-dependent) | 0        | 14890980 | 1000     | COG1063 | R | Threonine dehydrogenase and related Zn-dependent dehydroK00008      | POORLY CHARACTERIZED |                                    |
| PA4097 | probable alcohol dehydrogenase (Zn-dependent) | 0        | 14890980 | 1000     | COG1063 | E | Threonine dehydrogenase and related Zn-dependent dehydroK00008      | POORLY CHARACTERIZED |                                    |
| PA4135 | probable transcriptional regulator            | 28594792 | 0        | 0        | COG1846 | K | Transcriptional regulators                                          | K03712               | INFORMATION STORAGE AND PROCESSING |
| PA4139 | hypothetical protein                          | 0        | 2.26E+08 | 1000     |         |   |                                                                     |                      |                                    |
| PA4164 | hypothetical protein                          | 5824948  | 0        | 0        |         |   |                                                                     |                      |                                    |
| PA4175 | protease IV                                   | 1.98E+08 | 6.35E+08 | 3.20808  |         |   |                                                                     |                      |                                    |
| PA4176 | peptidyl-prolyl cis-trans isomerase C2        | 1.99E+09 | 1.34E+09 | 0.673936 | COG0760 | O | Parvulin-like peptidyl-prolyl isomerase                             | K03771               | CELLULAR PROCESSES AND SIGNALING   |
| PA4176 | peptidyl-prolyl cis-trans isomerase C2        | 1.99E+09 | 1.34E+09 | 0.673936 | COG0760 | O | Parvulin-like peptidyl-prolyl isomerase                             | K07533               | CELLULAR PROCESSES AND SIGNALING   |
| PA4176 | peptidyl-prolyl cis-trans isomerase C2        | 1.99E+09 | 1.34E+09 | 0.673936 | COG0760 | O | Parvulin-like peptidyl-prolyl isomerase                             | K03770               | CELLULAR PROCESSES AND SIGNALING   |
| PA4176 | peptidyl-prolyl cis-trans isomerase C2        | 1.99E+09 | 1.34E+09 | 0.673936 | COG0760 | O | Parvulin-like peptidyl-prolyl isomerase                             | K03769               | CELLULAR PROCESSES AND SIGNALING   |
| PA4211 | pzhB1                                         | 0        | 15591689 | 1000     | COG3631 | R | Ketosteroid isomerase-related protein                               | K06893               | POORLY CHARACTERIZED               |
| PA4230 | pchB                                          | 8.42E+08 | 5.82E+08 | 0.691196 | COG1605 | E | Chorismate mutase                                                   | K04782               | METABOLISM                         |
| PA4230 | pchB                                          | 8.42E+08 | 5.82E+08 | 0.691196 | COG1605 | E | Chorismate mutase                                                   | K14170               | METABOLISM                         |
| PA4230 | pchB                                          | 8.42E+08 | 5.82E+08 | 0.691196 | COG1605 | E | Chorismate mutase                                                   | K14187               | METABOLISM                         |
| PA4230 | pchB                                          | 8.42E+08 | 5.82E+08 | 0.691196 | COG1605 | E | Chorismate mutase                                                   | K04093               | METABOLISM                         |
| PA4230 | pchB                                          | 8.42E+08 | 5.82E+08 | 0.691196 | COG1605 | E | Chorismate mutase                                                   | K01850               | METABOLISM                         |
| PA4230 | pchB                                          | 8.42E+08 | 5.82E+08 | 0.691196 | COG1605 | E | Chorismate mutase                                                   | K13853               | METABOLISM                         |
| PA4230 | pchB                                          | 8.42E+08 | 5.82E+08 | 0.691196 | COG1605 | E | Chorismate mutase                                                   | K04092               | METABOLISM                         |
| PA4230 | pchB                                          | 8.42E+08 | 5.82E+08 | 0.691196 | COG1605 | E | Chorismate mutase                                                   | K04516               | METABOLISM                         |
| PA4232 | ssb                                           | 1.57E+08 | 2.1E+08  | 1.339922 | COG0629 | L | Single-stranded DNA-binding protein                                 | K03111               | INFORMATION STORAGE AND PROCESSING |
| PA4235 | fvaA                                          | 6.71E+09 | 5.45E+09 | 0.813125 | COG1493 | P | Bacterioferritin (cytochrome b1)                                    | K03594               | METABOLISM                         |
| PA4236 | kata                                          | 5.92E+08 | 2.93E+08 | 0.494419 | COG0753 | P | Catalase                                                            | K00429               | METABOLISM                         |
| PA4236 | kata                                          | 5.92E+08 | 2.93E+08 | 0.494419 | COG0753 | P | Catalase                                                            | K03781               | METABOLISM                         |
| PA4237 | rplQ                                          | 1.01E+10 | 6.02E+09 | 0.594527 | COG0203 | J | Ribosomal protein L17                                               | K02879               | INFORMATION STORAGE AND PROCESSING |
| PA4238 | rpoA                                          | 1.99E+09 | 4.13E+09 | 2.074744 | COG0202 | K | "DNA-directed RNA polymerase, alpha subunit/40 kD subunit"          | K03047               | INFORMATION STORAGE AND PROCESSING |
| PA4238 | rpoA                                          | 1.99E+09 | 4.13E+09 | 2.074744 | COG0202 | K | "DNA-directed RNA polymerase, alpha subunit/40 kD subunit"          | K03040               | INFORMATION STORAGE AND PROCESSING |
| PA4239 | rpsD                                          | 48572108 | 2.92E+08 | 6.021009 | COG0522 | J | Ribosomal protein S4 and related proteins                           | K02986               | INFORMATION STORAGE AND PROCESSING |
| PA4240 | rpsK                                          | 1.76E+08 | 7.23E+08 | 4.102362 | COG0100 | J | Ribosomal protein S11                                               | K02948               | INFORMATION STORAGE AND PROCESSING |
| PA4244 | rplO                                          | 3.89E+09 | 5.1E+09  | 1.312233 | COG0200 | J | Ribosomal protein L15                                               | K02876               | INFORMATION STORAGE AND PROCESSING |
| PA4245 | rpmD                                          | 91279203 | 5.27E+08 | 5.769197 | COG1841 | J | Ribosomal protein L30/L7E                                           | K02937               | INFORMATION STORAGE AND PROCESSING |
| PA4245 | rpmD                                          | 91279203 | 5.27E+08 | 5.769197 | COG1841 | J | Ribosomal protein L30/L7E                                           | K02907               | INFORMATION STORAGE AND PROCESSING |
| PA4246 | rpsE                                          | 4.54E+08 | 3.07E+09 | 6.750367 | COG0098 | J | Ribosomal protein S5                                                | K02981               | INFORMATION STORAGE AND PROCESSING |
| PA4246 | rpsE                                          | 4.54E+08 | 3.07E+09 | 6.750367 | COG0098 | J | Ribosomal protein S5                                                | K02988               | INFORMATION STORAGE AND PROCESSING |
| PA4247 | rplR                                          | 2.61E+08 | 8.49E+08 | 3.253879 | COG0256 | J | Ribosomal protein L18                                               | K02881               | INFORMATION STORAGE AND PROCESSING |
| PA4248 | rplF                                          | 3.36E+08 | 1.08E+09 | 3.213564 | COG0097 | J | Ribosomal protein L6P/L9E                                           | K02933               | INFORMATION STORAGE AND PROCESSING |
| PA4248 | rplF                                          | 3.36E+08 | 1.08E+09 | 3.213564 | COG0097 | J | Ribosomal protein L6P/L9E                                           | K02940               | INFORMATION STORAGE AND PROCESSING |
| PA4249 | rpsH                                          | 3.08E+09 | 1.75E+09 | 0.566008 | COG0096 | J | Ribosomal protein S8                                                | K02994               | INFORMATION STORAGE AND PROCESSING |
| PA4250 | rpsN                                          | 2.6E+08  | 6.96E+08 | 2.671497 | COG0199 | J | Ribosomal protein S14                                               | K02954               | INFORMATION STORAGE AND PROCESSING |
| PA4251 | rplE                                          | 3.1E+09  | 4E+09    | 1.289802 | COG0094 | J | Ribosomal protein L5                                                | K02931               | INFORMATION STORAGE AND PROCESSING |
| PA4252 | rplX                                          | 8.53E+09 | 1.21E+10 | 1.422891 | COG0198 | J | Ribosomal protein L24                                               | K02895               | INFORMATION STORAGE AND PROCESSING |
| PA4254 | rpsQ                                          | 91609951 | 4.72E+08 | 5.150554 | COG0186 | J | Ribosomal protein S17                                               | K02961               | INFORMATION STORAGE AND PROCESSING |
| PA4255 | rpmC                                          | 2.07E+10 | 2.24E+10 | 1.083765 | COG0255 | J | Ribosomal protein L29                                               | K02918               | INFORMATION STORAGE AND PROCESSING |
| PA4255 | rpmC                                          | 2.07E+10 | 2.24E+10 | 1.083765 | COG0255 | J | Ribosomal protein L29                                               | K02904               | INFORMATION STORAGE AND PROCESSING |
| PA4257 | rpsC                                          | 99643482 | 1.7E+08  | 1.708558 | COG0092 | J | Ribosomal protein S3                                                | K02982               | INFORMATION STORAGE AND PROCESSING |
| PA4258 | rplV                                          | 1.65E+09 | 2.23E+09 | 1.346674 | COG0091 | J | Ribosomal protein L22                                               | K02890               | INFORMATION STORAGE AND PROCESSING |
| PA4259 | rpsS                                          | 4.51E+08 | 1.45E+09 | 3.209029 | COG0185 | J | Ribosomal protein S19                                               | K02965               | INFORMATION STORAGE AND PROCESSING |
| PA4260 | rplW                                          | 21748358 | 1.53E+08 | 7.019821 | COG0090 | J | Ribosomal protein L2                                                | K02886               | INFORMATION STORAGE AND PROCESSING |
| PA4261 | rplB                                          | 3.18E+08 | 1.9E+09  | 5.969437 | COG0089 | J | Ribosomal protein L23                                               | K02892               | INFORMATION STORAGE AND PROCESSING |
| PA4261 | rplW                                          | 3.18E+08 | 1.9E+09  | 5.969437 | COG0089 | J | Ribosomal protein L23                                               | K02893               | INFORMATION STORAGE AND PROCESSING |
| PA4262 | rplD                                          | 34948059 | 38245121 | 1.094342 | COG0088 | J | Ribosomal protein L4                                                | K02926               | INFORMATION STORAGE AND PROCESSING |
| PA4262 | rplD                                          | 34948059 | 38245121 | 1.094342 | COG0088 | J | Ribosomal protein L4                                                | K02930               | INFORMATION STORAGE AND PROCESSING |
| PA4263 | rplC                                          | 31857404 | 1.66E+08 | 5.210799 | COG0087 | J | Ribosomal protein L3                                                | K02925               | INFORMATION STORAGE AND PROCESSING |
| PA4263 | rplC                                          | 31857404 | 1.66E+08 | 5.210799 | COG0087 | J | Ribosomal protein L3                                                | K02906               | INFORMATION STORAGE AND PROCESSING |
| PA4264 | rpsJ                                          | 98428884 | 1.88E+09 | 19.09406 | COG0051 | J | Ribosomal protein S10                                               | K02946               | INFORMATION STORAGE AND PROCESSING |
| PA4266 | fusA1                                         | 3.54E+08 | 1.22E+09 | 3.449641 | COG0480 | J | Translation elongation factors (GTPases)                            | K03234               | INFORMATION STORAGE AND PROCESSING |
| PA4266 | fusA1                                         | 3.54E+08 | 1.22E+09 | 3.449641 | COG0480 | J | Translation elongation factors (GTPases)                            | K02355               | INFORMATION STORAGE AND PROCESSING |
| PA4267 | rpsG                                          | 1.02E+10 | 8.04E+09 | 0.787247 | COG0049 | J | Ribosomal protein S7                                                | K02992               | INFORMATION STORAGE AND PROCESSING |
| PA4269 | rpoC                                          | 20455648 | 1.39E+08 | 6.807375 | COG0086 | K | "DNA-directed RNA polymerase, beta' subunit/160 kD subunit"         | K03042               | INFORMATION STORAGE AND PROCESSING |
| PA4269 | rpoC                                          | 20455648 | 1.39E+08 | 6.807375 | COG0086 | K | "DNA-directed RNA polymerase, beta' subunit/160 kD subunit"         | K03046               | INFORMATION STORAGE AND PROCESSING |
| PA4269 | rpoC                                          | 20455648 | 1.39E+08 | 6.807375 | COG0086 | K | "DNA-directed RNA polymerase, beta' subunit/160 kD subunit"         | K03041               | INFORMATION STORAGE AND PROCESSING |
| PA4270 | rpoB                                          | 10712322 | 1.41E+08 | 13.15328 | COG0085 | K | "DNA-directed RNA polymerase, beta subunit/140 kD subunit"          | K03043               | INFORMATION STORAGE AND PROCESSING |
| PA4271 | rplL                                          | 3.74E+10 | 7.44E+10 | 1.991144 | COG0222 | J | Ribosomal protein L7/L12                                            | K02935               | INFORMATION STORAGE AND PROCESSING |
| PA4272 | rplJ                                          | 4.82E+09 | 5.1E+09  | 1.058794 | COG0244 | J | Ribosomal protein L10                                               | K02864               | INFORMATION STORAGE AND PROCESSING |
| PA4273 | rplA                                          | 4.97E+09 | 5.2E+09  | 1.045926 | COG0081 | J | Ribosomal protein L1                                                | K02863               | INFORMATION STORAGE AND PROCESSING |
| PA4274 | rplK                                          | 2.27E+08 | 1.01E+09 | 4.446979 | COG0080 | J | Ribosomal protein L11                                               | K02867               | INFORMATION STORAGE AND PROCESSING |
| PA4275 | nusG                                          | 15254149 | 0        | 0        | COG0250 | K | Transcription antiterminator                                        | K02601               | INFORMATION STORAGE AND PROCESSING |
| PA4275 | nusG                                          | 15254149 | 0        | 0        | COG0250 | K | Transcription antiterminator                                        | K05785               | INFORMATION STORAGE AND PROCESSING |
| PA4277 | tufB                                          | 6.97E+09 | 2.41E+10 | 3.458887 | COG0050 | J | GTPases - translation elongation factors                            | K02358               | INFORMATION STORAGE AND PROCESSING |
| PA4307 | ptcB                                          | 1.03E+08 | 1.1E+09  | 10.70025 | COG0840 | T | Methyl-accepting chemotaxis protein                                 | K03406               | CELLULAR PROCESSES AND SIGNALING   |
| PA4307 | ptcC                                          | 1.03E+08 | 1.1E+09  | 10.70025 | COG0840 | T | Methyl-accepting chemotaxis protein                                 | K03406               | CELLULAR PROCESSES AND SIGNALING   |
| PA4309 | ptcA                                          | 1.38E+08 | 1.22E+09 | 8.88316  | COG0840 | N | Methyl-accepting chemotaxis protein                                 | K03406               | CELLULAR PROCESSES AND SIGNALING   |
| PA4309 | ptcA                                          | 1.38E+08 | 1.22E+09 | 8.88316  | COG0840 | N | Methyl-accepting chemotaxis protein                                 | K03406               | CELLULAR PROCESSES AND SIGNALING   |
| PA4310 | ptcB                                          | 1.03E+08 | 1.07E+09 | 10.37231 | COG0840 | N | Methyl-accepting chemotaxis protein                                 | K03406               | CELLULAR PROCESSES AND SIGNALING   |
| PA4310 | ptcB                                          | 1.03E+08 | 1.07E+09 | 10.37231 | COG0840 | N | Methyl-accepting chemotaxis protein                                 | K03406               | CELLULAR PROCESSES AND SIGNALING   |
| PA4315 | mvaT                                          | 4.9E+10  | 2.09E+10 | 0.426297 |         |   |                                                                     |                      |                                    |
| PA4318 | hypothetical protein                          | 0        | 57286156 | 1000     |         |   |                                                                     |                      |                                    |
| PA4329 | pykA                                          | 35114831 | 50668548 | 1.442939 | COG0469 | G | Pyruvate kinase                                                     | K00873               | METABOLISM                         |
| PA4333 | probable fumarase                             | 49442883 | 1.69E+08 | 3.412611 | COG1838 | C | "Tartrate dehydratase beta subunit/Fumarate hydratase class K01678  | K01678               | METABOLISM                         |
| PA4333 | probable fumarase                             | 49442883 | 1.69E+08 | 3.412611 | COG1838 | C | "Tartrate dehydratase beta subunit/Fumarate hydratase class K01676  | K01676               | METABOLISM                         |
| PA4333 | probable fumarase                             | 49442883 | 1.69E+08 | 3.412611 | COG1838 | C | "Tartrate dehydratase beta subunit/Fumarate hydratase class K03780  | K03780               | METABOLISM                         |
| PA4333 | probable fumarase                             | 49442883 | 1.69E+08 | 3.412611 | COG1951 | C | "Tartrate dehydratase alpha subunit/Fumarate hydratase class K01677 | K01677               | METABOLISM                         |
| PA4333 | probable fumarase                             | 49442883 | 1.69E+08 | 3.412611 | COG1951 | C | "Tartrate dehydratase alpha subunit/Fumarate hydratase class K01676 | K01676               | METABOLISM                         |
| PA4333 | probable fumarase                             | 49442883 | 1.69E+08 | 3.412611 | COG1951 | C | "Tartrate dehydratase alpha subunit/Fumarate hydratase class K03779 | K03779               | METABOLISM                         |
| PA4336 | conserved hypothetical protein                | 4.01E+08 | 3.78E+08 | 0.942669 | COG0693 | R | Putative intracellular protease/amidase                             | K05520               | POORLY CHARACTERIZED               |
| PA4336 | conserved hypothetical protein                | 4.01E+08 | 3.78E+08 | 0.942669 | COG0693 | R | Putative intracellular protease/amidase                             | K03152               | POORLY CHARACTERIZED               |
| PA4349 | hypothetical protein                          | 0        | 1.79E+08 | 1000     | COG1960 | I | Acyl-CoA dehydrogenases                                             | K00257               | METABOLISM                         |
| PA4349 | hypothetical protein                          | 0        | 1.79E+08 | 1000     | COG1960 | I | Acyl-CoA dehydrogenases                                             | K00249               | METABOLISM                         |
| PA4352 | conserved hypothetical protein                | 1.3E+09  | 9.63E+08 | 0.740998 | COG0589 | T | Universal stress protein UspA and related nucleotide-binding        | K06149               | CELLULAR PROCESSES AND SIGNALING   |
| PA4366 | sodB                                          | 1.96E+09 | 1.52E+09 | 0.775348 | COG0605 | P | Superoxide dismutase                                                | K04564               | METABOLISM                         |
| PA4369 | hypothetical protein                          | 1.21E+09 | 63599121 | 5.27E-02 | COG1704 | S | Uncharacterized conserved protein                                   | K03744               | POORLY CHARACTERIZED               |
| PA4370 | icmP                                          | 4.23E+10 | 4.78E+10 | 1.129842 | COG3487 | P | Uncharacterized iron-regulated protein                              | K07231               | METABOLISM                         |
| PA4372 | hypothetical protein                          | 5.14E+08 | 1.57E+08 | 0.304663 | COG3489 | R | Predicted periplasmic lipoprotein                                   | K07338               | POORLY CHARACTERIZED               |
| PA4385 | groEL                                         | 2.35E+10 | 2.46E+10 | 1.047743 | COG0459 | O | Chaperonin GroEL (HSP60 family)                                     | K04077               | CELLULAR PROCESSES AND SIGNALING   |
| PA4386 | groES                                         | 3.61E+10 | 3.44E+10 | 0.953209 | COG0234 | O | Co-chaperonin GroES (HSP10)                                         | K04078               | CELLULAR PROCESSES AND SIGNALING   |
| PA4389 | 3-oxacyl-acyl carrier protein reductase       | 0        | 28671984 | 1000     | COG1028 | I | Dehydrogenases with different specificities (related to short-c     | K00059               | METABOLISM                         |
| PA4389 | 3-oxacyl-acyl carrier protein reductase       | 0        | 28671984 | 1000     | COG1028 | Q | Dehydrogenases with different specificities (related to short-c     | K00059               | METABOLISM                         |
| PA4389 | 3-oxacyl-acyl carrier protein reductase       | 0        | 28671984 | 1000     | COG1028 | R | Dehydrogenases with different specificities (related to short-c     | K00059               | POORLY CHARACTERIZED               |
| PA4394 | conserved hypothetical protein                | 0        | 48024817 | 1000     | COG0668 | M | Small-conductance mechanosensitive channel                          | K03442               | CELLULAR PROCESSES AND SIGNALING   |
| PA4395 | conserved hypothetical protein                | 5.39E+09 | 1.43E+09 | 0.264478 | COG1666 | S | Uncharacterized protein conserved in bacteria                       | K09767               | POORLY CHARACTERIZED               |
| PA4399 | conserved hypothetical protein                | 1.65E+08 | 0        | 0        | COG0296 | S | Uncharacterized conserved protein                                   | K00798               | POORLY CHARACTERIZED               |
| PA4402 | argI                                          | 25028576 | 0        | 0        | COG1364 | E | N-acetylglutamate synthase (N-acetylornithine aminotransferase)     | K00620               | METABOLISM                         |
| PA4403 | secA                                          | 2.06E+08 | 5.93E+08 | 2.886603 | COG0653 | U | "Preprotein translocase subunit SecA (ATPase, RNA helicase)"        | K03070               | CELLULAR PROCESSES AND SIGNALING   |
| PA4406 | lpxC                                          | 4.77E+08 | 4.46E+08 | 0.933415 | COG0774 | M | UDP-3-O-acyl-N-acetylglucosamine deacetylase                        | K02535               | CELLULAR PROCESSES AND SIGNALING   |
| PA4407 | ftsZ                                          | 9.46E+08 | 4.5E+08  | 0.478004 | COG0206 | D | Cell division GTPase                                                | K03531               | CELLULAR PROCESSES AND SIGNALING   |
| PA4408 | ftsA                                          | 68051520 | 0        | 0        | COG0849 | D | Actin-like ATPase involved in cell division                         | K03590               | CELLULAR PROCESSES AND SIGNALING   |
| PA4409 | ftsQ                                          | 4.06E+08 | 0        | 0        | COG1589 | M | Cell division septal protein                                        | K03589               | CELLULAR PROCESSES AND SIGNALING   |
| PA4417 | murE                                          | 0        | 28333087 | 1000     | COG0769 | M | UDP-N-acetylmuramyl tripeptide synthase                             | K01928               | CELLULAR PROCESSES AND SIGNALING   |
| PA4417 | murE                                          | 0        | 28333087 | 1000     | COG0769 | M | UDP-N-acetylmuramyl tripeptide synthase                             | K05362               | CELLULAR PROCESSES AND SIGNALING   |
| PA4417 | murE                                          | 0        | 28333087 | 1000     | COG0769 | M | UDP-N-acetylmuramyl tripeptide synthase                             | K03802               | CELLULAR PROCESSES AND SIGNALING   |

|        |       |                                                   |          |          |          |         |   |                                                                     |        |                                    |
|--------|-------|---------------------------------------------------|----------|----------|----------|---------|---|---------------------------------------------------------------------|--------|------------------------------------|
| PA4432 | rpsI  | 30S ribosomal protein S9                          | 0        | 24530842 | 1000     | COG0103 | J | Ribosomal protein S9                                                | K02996 | INFORMATION STORAGE AND PROCESSING |
| PA4433 | rplM  | S0S ribosomal protein L13                         | 1.02E+09 | 3.39E+09 | 3.314908 | COG0102 | J | Ribosomal protein L13                                               | K02871 | INFORMATION STORAGE AND PROCESSING |
| PA4438 |       | conserved hypothetical protein                    | 31472200 | 0        | 0        | COG1485 | R | Predicted ATPase                                                    | K06916 | POORLY CHARACTERIZED               |
| PA4439 | trpS  | tryptophanyl-tRNA synthetase                      | 17603443 | 48921066 | 2.779062 | COG0180 | J | Tryptophanyl-tRNA synthetase                                        | K01867 | INFORMATION STORAGE AND PROCESSING |
| PA4441 |       | hypothetical protein                              | 6.14E+09 | 6.44E+09 | 1.047534 | COG3105 | S | Uncharacterized protein conserved in bacteria                       | K09908 | POORLY CHARACTERIZED               |
| PA4454 |       | conserved hypothetical protein                    | 0        | 36505618 | 1000     | COG1463 | Q | "ABC-type transport system involved in resistance to organic s      | K02067 | METABOLISM                         |
| PA4457 |       | arabinose-5-phosphate isomerase KdsD              | 27242201 | 47403781 | 1.740086 | COG0794 | M | Predicted sugar phosphate isomerase involved in capsule form K02467 | K00888 | CELLULAR PROCESSES AND SIGNALING   |
| PA4457 |       | arabinose-5-phosphate isomerase KdsD              | 27242201 | 47403781 | 1.740086 | COG0794 | M | FOG: CBS domain                                                     | K00888 | POORLY CHARACTERIZED               |
| PA4457 |       | arabinose-5-phosphate isomerase KdsD              | 27242201 | 47403781 | 1.740086 | COG0794 | M | Predicted sugar phosphate isomerase involved in capsule form K06041 | K00894 | CELLULAR PROCESSES AND SIGNALING   |
| PA4457 |       | arabinose-5-phosphate isomerase KdsD              | 27242201 | 47403781 | 1.740086 | COG0794 | M | Predicted sugar phosphate isomerase involved in capsule form K08094 | K00894 | CELLULAR PROCESSES AND SIGNALING   |
| PA4457 |       | arabinose-5-phosphate isomerase KdsD              | 27242201 | 47403781 | 1.740086 | COG0794 | M | FOG: CBS domain                                                     | K06041 | POORLY CHARACTERIZED               |
| PA4459 | lptC  | Lipopolysaccharide export system protein LptC     | 7.69E+08 | 3E+08    | 0.390399 | COG3117 | S | Uncharacterized protein conserved in bacteria                       | K11719 | POORLY CHARACTERIZED               |
| PA4460 | lptH  | LptH                                              | 1.18E+08 | 2.42E+08 | 2.038829 | COG1934 | S | Uncharacterized protein conserved in bacteria                       | K09774 | POORLY CHARACTERIZED               |
| PA4463 |       | conserved hypothetical protein                    | 1.2E+08  | 15133101 | 0.125771 | COG1544 | J | Ribosome-associated protein Y (P5rp-1)                              | K05808 | INFORMATION STORAGE AND PROCESSING |
| PA4463 |       | conserved hypothetical protein                    | 1.2E+08  | 15133101 | 0.125771 | COG1544 | J | Ribosome-associated protein Y (P5rp-1)                              | K05809 | INFORMATION STORAGE AND PROCESSING |
| PA4464 | ptsN  | nitrogen regulatory IIA protein                   | 3.56E+08 | 2.09E+08 | 0.586104 | COG1762 | T | Phosphotransferase system mannitol/fructose-specific IIA dorK02770  | K02821 | CELLULAR PROCESSES AND SIGNALING   |
| PA4464 | ptsN  | nitrogen regulatory IIA protein                   | 3.56E+08 | 2.09E+08 | 0.586104 | COG1762 | T | Phosphotransferase system mannitol/fructose-specific IIA dorK02821  | K02821 | METABOLISM                         |
| PA4464 | ptsN  | nitrogen regulatory IIA protein                   | 3.56E+08 | 2.09E+08 | 0.586104 | COG1762 | T | Phosphotransferase system mannitol/fructose-specific IIA dorK02806  | K02806 | METABOLISM                         |
| PA4464 | ptsN  | nitrogen regulatory IIA protein                   | 3.56E+08 | 2.09E+08 | 0.586104 | COG1762 | T | Phosphotransferase system mannitol/fructose-specific IIA dorK02770  | K02770 | METABOLISM                         |
| PA4464 | ptsN  | nitrogen regulatory IIA protein                   | 3.56E+08 | 2.09E+08 | 0.586104 | COG1762 | T | Phosphotransferase system mannitol/fructose-specific IIA dorK02770  | K02770 | METABOLISM                         |
| PA4464 | ptsN  | nitrogen regulatory IIA protein                   | 3.56E+08 | 2.09E+08 | 0.586104 | COG1762 | T | Phosphotransferase system mannitol/fructose-specific IIA dorK02770  | K02770 | METABOLISM                         |
| PA4464 | ptsN  | nitrogen regulatory IIA protein                   | 3.56E+08 | 2.09E+08 | 0.586104 | COG1762 | T | Phosphotransferase system mannitol/fructose-specific IIA dorK02770  | K02770 | METABOLISM                         |
| PA4464 | ptsN  | nitrogen regulatory IIA protein                   | 3.56E+08 | 2.09E+08 | 0.586104 | COG1762 | T | Phosphotransferase system mannitol/fructose-specific IIA dorK02770  | K02770 | METABOLISM                         |
| PA4464 | ptsN  | nitrogen regulatory IIA protein                   | 3.56E+08 | 2.09E+08 | 0.586104 | COG1762 | T | Phosphotransferase system mannitol/fructose-specific IIA dorK02770  | K02770 | METABOLISM                         |
| PA4464 | ptsN  | nitrogen regulatory IIA protein                   | 3.56E+08 | 2.09E+08 | 0.586104 | COG1762 | T | Phosphotransferase system mannitol/fructose-specific IIA dorK02770  | K02770 | METABOLISM                         |
| PA4464 | ptsN  | nitrogen regulatory IIA protein                   | 3.56E+08 | 2.09E+08 | 0.586104 | COG1762 | T | Phosphotransferase system mannitol/fructose-specific IIA dorK02770  | K02770 | METABOLISM                         |
| PA4464 | ptsN  | nitrogen regulatory IIA protein                   | 3.56E+08 | 2.09E+08 | 0.586104 | COG1762 | T | Phosphotransferase system mannitol/fructose-specific IIA dorK02770  | K02770 | METABOLISM                         |
| PA4468 | sodM  | superoxide dismutase                              | 0        | 48967286 | 1000     | COG0605 | P | Superoxide dismutase                                                | K04564 | METABOLISM                         |
| PA4470 | fumC1 | fumarate hydratase                                | 70276584 | 6.09E+08 | 8.664241 | COG0114 | C | Fumarase                                                            | K01679 | METABOLISM                         |
| PA4473 |       | hypothetical protein                              | 2.35E+09 | 2.99E+08 | 0.12748  | COG3028 | S | Uncharacterized protein conserved in bacteria                       | K09889 | POORLY CHARACTERIZED               |
| PA4473 |       | hypothetical protein                              | 2.35E+09 | 2.99E+08 | 0.12748  | COG3028 | S | Uncharacterized protein conserved in bacteria                       | K09889 | POORLY CHARACTERIZED               |
| PA4473 |       | hypothetical protein                              | 2.35E+09 | 2.99E+08 | 0.12748  | COG3028 | S | Uncharacterized protein conserved in bacteria                       | K09889 | POORLY CHARACTERIZED               |
| PA4473 |       | hypothetical protein                              | 2.35E+09 | 2.99E+08 | 0.12748  | COG3028 | S | Uncharacterized protein conserved in bacteria                       | K09889 | POORLY CHARACTERIZED               |
| PA4480 | mreC  | rod shape-determining protein MreC                | 29619827 | 0        | 0        | COG1792 | M | Cell shape-determining protein                                      | K03570 | CELLULAR PROCESSES AND SIGNALING   |
| PA4481 | mreB  | rod shape-determining protein MreB                | 79412164 | 1.46E+08 | 1.841378 | COG1077 | D | Actin-like ATPase involved in cell morphogenesis                    | K03569 | CELLULAR PROCESSES AND SIGNALING   |
| PA4482 | gatC  | Glu-tRNA(Gln) amidotransferase subunit C          | 2.54E+09 | 2.1E+09  | 0.825038 | COG0721 | J | Asp-tRNAAsn/Glu-tRNA(Gln) amidotransferase C subunit                | K02435 | INFORMATION STORAGE AND PROCESSING |
| PA4483 | gatA  | Glu-tRNA(Gln) amidotransferase subunit A          | 11349115 | 0        | 0        | COG0154 | J | Asp-tRNAAsn/Glu-tRNA(Gln) amidotransferase A subunit and reK01426   | K01426 | INFORMATION STORAGE AND PROCESSING |
| PA4483 | gatA  | Glu-tRNA(Gln) amidotransferase subunit A          | 11349115 | 0        | 0        | COG0154 | J | Asp-tRNAAsn/Glu-tRNA(Gln) amidotransferase A subunit and reK02433   | K02433 | INFORMATION STORAGE AND PROCESSING |
| PA4484 | gatB  | Glu-tRNA(Gln) amidotransferase subunit B          | 1.06E+08 | 5.46E+08 | 1.569849 | COG0064 | J | Asp-tRNAAsn/Glu-tRNA(Gln) amidotransferase B subunit (PET1:K02434   | K02434 | INFORMATION STORAGE AND PROCESSING |
| PA4493 | roxB  | RoxR                                              | 20543592 | 0        | 0        |         |   |                                                                     |        |                                    |
| PA4495 |       | hypothetical protein                              | 3.16E+09 | 2.35E+09 | 0.742015 |         |   |                                                                     |        |                                    |
| PA4520 |       | probable chemotaxis transducer                    | 0        | 6.58E+08 | 1000     | COG0840 | T | Methyl-accepting chemotaxis protein                                 | K03406 | CELLULAR PROCESSES AND SIGNALING   |
| PA4520 |       | probable chemotaxis transducer                    | 0        | 6.58E+08 | 1000     | COG0840 | T | Methyl-accepting chemotaxis protein                                 | K03406 | CELLULAR PROCESSES AND SIGNALING   |
| PA4524 | nadC  | nicotinate-nucleotide pyrophosphorylase           | 11353851 | 0        | 0        | COG0157 | H | Nicotinate-nucleotide pyrophosphorylase                             | K00767 | METABOLISM                         |
| PA4524 | nadC  | nicotinate-nucleotide pyrophosphorylase           | 11353851 | 0        | 0        | COG0157 | H | Nicotinate-nucleotide pyrophosphorylase                             | K03813 | METABOLISM                         |
| PA4525 | piIA  | type 4 fimbrial precursor PilA                    | 8.12E+09 | 9.85E+09 | 1.213607 | COG4969 | N | "Ttp plus assembly protein, major pilin PilA"                       | K02682 | CELLULAR PROCESSES AND SIGNALING   |
| PA4525 | piIA  | type 4 fimbrial precursor PilA                    | 8.12E+09 | 9.85E+09 | 1.213607 | COG4969 | N | "Ttp plus assembly protein, major pilin PilA"                       | K02655 | CELLULAR PROCESSES AND SIGNALING   |
| PA4525 | piIA  | type 4 fimbrial precursor PilA                    | 8.12E+09 | 9.85E+09 | 1.213607 | COG4969 | N | "Ttp plus assembly protein, major pilin PilA"                       | K02682 | CELLULAR PROCESSES AND SIGNALING   |
| PA4525 | piIA  | type 4 fimbrial precursor PilA                    | 8.12E+09 | 9.85E+09 | 1.213607 | COG4969 | N | "Ttp plus assembly protein, major pilin PilA"                       | K02655 | CELLULAR PROCESSES AND SIGNALING   |
| PA4525 | piIA  | type 4 fimbrial precursor PilA                    | 8.12E+09 | 9.85E+09 | 1.213607 | COG4969 | N | "Ttp plus assembly protein, major pilin PilA"                       | K02655 | CELLULAR PROCESSES AND SIGNALING   |
| PA4525 | piIA  | type 4 fimbrial precursor PilA                    | 8.12E+09 | 9.85E+09 | 1.213607 | COG4969 | N | "Ttp plus assembly protein, major pilin PilA"                       | K02655 | CELLULAR PROCESSES AND SIGNALING   |
| PA4525 | piIA  | type 4 fimbrial precursor PilA                    | 8.12E+09 | 9.85E+09 | 1.213607 | COG4969 | N | "Ttp plus assembly protein, major pilin PilA"                       | K02655 | CELLULAR PROCESSES AND SIGNALING   |
| PA4529 | coaE  | dephosphocoenzyme A kinase                        | 1.4E+08  | 43140238 | 0.309054 | COG0237 | H | Dephospho-CoA kinase                                                | K00859 | METABOLISM                         |
| PA4530 |       | conserved hypothetical protein                    | 51494239 | 1.38E+08 | 2.67622  | COG0324 | S | Uncharacterized protein conserved in bacteria                       | K09862 | POORLY CHARACTERIZED               |
| PA4536 |       | hypothetical protein                              | 0        | 1.54E+08 | 1000     |         |   |                                                                     |        |                                    |
| PA4542 | clpB  | ClpB protein                                      | 4.51E+08 | 6.91E+08 | 1.531048 | COG0542 | O | "ATPases with chaperone activity, ATP-binding subunit"              | K03695 | CELLULAR PROCESSES AND SIGNALING   |
| PA4542 | clpB  | ClpB protein                                      | 4.51E+08 | 6.91E+08 | 1.531048 | COG0542 | O | "ATPases with chaperone activity, ATP-binding subunit"              | K11907 | CELLULAR PROCESSES AND SIGNALING   |
| PA4542 | clpB  | ClpB protein                                      | 4.51E+08 | 6.91E+08 | 1.531048 | COG0542 | O | "ATPases with chaperone activity, ATP-binding subunit"              | K03696 | CELLULAR PROCESSES AND SIGNALING   |
| PA4545 | comL  | competence protein ComL                           | 20732083 | 46274173 | 2.232008 | COG4105 | R | "ATPases with chaperone activity, ATP-binding subunit"              | K03694 | CELLULAR PROCESSES AND SIGNALING   |
| PA4555 | piIY2 | type 4 fimbrial biogenesis protein PilY2          | 1.07E+08 | 0        | 0        |         |   | DNA uptake lipoprotein                                              | K05807 | POORLY CHARACTERIZED               |
| PA4558 |       | "probable peptidyl-prolyl cis-trans isomerase     | 7.11E+08 | 5.94E+08 | 0.83565  | COG1047 | O | FKBP-type peptidyl-prolyl cis-trans isomerases 2                    | K03774 | CELLULAR PROCESSES AND SIGNALING   |
| PA4558 |       | "probable peptidyl-prolyl cis-trans isomerase     | 7.11E+08 | 5.94E+08 | 0.83565  | COG1047 | O | FKBP-type peptidyl-prolyl cis-trans isomerases 2                    | K03775 | CELLULAR PROCESSES AND SIGNALING   |
| PA4558 |       | "probable peptidyl-prolyl cis-trans isomerase     | 7.11E+08 | 5.94E+08 | 0.83565  | COG1047 | O | FKBP-type peptidyl-prolyl cis-trans isomerases 2                    | K01802 | CELLULAR PROCESSES AND SIGNALING   |
| PA4563 | rpsT  | 30S ribosomal protein S20                         | 6.78E+09 | 6.13E+09 | 0.9034   | COG0268 | J | Ribosomal protein S20                                               | K02968 | INFORMATION STORAGE AND PROCESSING |
| PA4566 | obg   | GTP-binding protein Obg                           | 45523638 | 0        | 0        | COG0536 | R | Predicted GTPase                                                    | K03979 | POORLY CHARACTERIZED               |
| PA4568 | rplU  | S0S ribosomal protein L21                         | 0        | 70213639 | 1000     | COG0261 | J | Ribosomal protein L21                                               | K02888 | INFORMATION STORAGE AND PROCESSING |
| PA4572 | fkfB  | peptidyl-prolyl cis-trans isomerase Fkfb          | 6.49E+08 | 1.78E+08 | 2.745913 | COG0545 | O | FKBP-type peptidyl-prolyl cis-trans isomerases 1                    | K01802 | CELLULAR PROCESSES AND SIGNALING   |
| PA4572 | fkfB  | peptidyl-prolyl cis-trans isomerase Fkfb          | 6.49E+08 | 1.78E+08 | 2.745913 | COG0545 | O | FKBP-type peptidyl-prolyl cis-trans isomerases 1                    | K03772 | CELLULAR PROCESSES AND SIGNALING   |
| PA4572 | fkfB  | peptidyl-prolyl cis-trans isomerase Fkfb          | 6.49E+08 | 1.78E+08 | 2.745913 | COG0545 | O | FKBP-type peptidyl-prolyl cis-trans isomerases 1                    | K03773 | CELLULAR PROCESSES AND SIGNALING   |
| PA4572 | fkfB  | peptidyl-prolyl cis-trans isomerase Fkfb          | 6.49E+08 | 1.78E+08 | 2.745913 | COG0545 | O | FKBP-type peptidyl-prolyl cis-trans isomerases 1                    | K09575 | CELLULAR PROCESSES AND SIGNALING   |
| PA4576 |       | probable ATP-dependent protease                   | 0        | 8360814  | 1000     | COG1067 | O | Predicted ATP-dependent protease                                    | K04770 | CELLULAR PROCESSES AND SIGNALING   |
| PA4576 |       | probable ATP-dependent protease                   | 0        | 8360814  | 1000     | COG1067 | O | Predicted ATP-dependent protease                                    | K04076 | CELLULAR PROCESSES AND SIGNALING   |
| PA4576 |       | probable ATP-dependent protease                   | 0        | 8360814  | 1000     | COG1067 | O | Predicted ATP-dependent protease                                    | K01338 | CELLULAR PROCESSES AND SIGNALING   |
| PA4577 |       | hypothetical protein                              | 1.28E+08 | 9.77E+08 | 7.613762 | COG1734 | T | DnaK suppressor protein                                             | K06204 | CELLULAR PROCESSES AND SIGNALING   |
| PA4577 | ccpR  | cytochrome c551 peroxidase precursor              | 1.21E+09 | 1.11E+08 | 9.15E-02 | COG1858 | P | Cytochrome c peroxidase                                             | K00428 | METABOLISM                         |
| PA4595 |       | probable ATP-binding component of ABC transporter | 2.67E+08 | 2.47E+09 | 9.2377   | COG0488 | R | ATPase components of ABC transporters with duplicated ATP:K06158    | K06158 | POORLY CHARACTERIZED               |
| PA4602 | glyA3 | serine hydroxymethyltransferase                   | 0        | 1.1E+08  | 1000     | COG0112 | E | Glycine/serine hydroxymethyltransferase                             | K00600 | METABOLISM                         |
| PA4611 |       | hypothetical protein                              | 1.11E+10 | 7.79E+09 | 0.699866 | COG2841 | S | Uncharacterized protein conserved in bacteria                       | K09794 | POORLY CHARACTERIZED               |
| PA4632 |       | hypothetical protein                              | 2.58E+08 | 16171473 | 6.26E-02 | COG0501 | O | Zn-dependent protease with chaperone function                       | K07387 | CELLULAR PROCESSES AND SIGNALING   |
| PA4632 |       | hypothetical protein                              | 2.58E+08 | 16171473 | 6.26E-02 | COG0501 | O | Zn-dependent protease with chaperone function                       | K06013 | CELLULAR PROCESSES AND SIGNALING   |
| PA4632 |       | hypothetical protein                              | 2.58E+08 | 16171473 | 6.26E-02 | COG0501 | O | Zn-dependent protease with chaperone function                       | K03799 | CELLULAR PROCESSES AND SIGNALING   |
| PA4633 |       | probable chemotaxis transducer                    | 0        | 7.3E+08  | 1000     | COG0840 | T | Methyl-accepting chemotaxis protein                                 | K03406 | CELLULAR PROCESSES AND SIGNALING   |
| PA4633 |       | probable chemotaxis transducer                    | 0        | 7.3E+08  | 1000     | COG0840 | N | Methyl-accepting chemotaxis protein                                 | K03406 | CELLULAR PROCESSES AND SIGNALING   |
| PA4639 |       | hypothetical protein                              | 29179569 | 73265823 | 2.51086  |         |   |                                                                     |        |                                    |
| PA4640 | mgoB  | malate:quinone oxidoreductase                     | 30914057 | 72144646 | 2.333717 | COG0579 | R | Predicted dehydrogenase                                             | K00116 | POORLY CHARACTERIZED               |
| PA4640 | mgoB  | malate:quinone oxidoreductase                     | 30914057 | 72144646 | 2.333717 | COG0579 | R | Predicted dehydrogenase                                             | K00111 | POORLY CHARACTERIZED               |
| PA4642 |       | hypothetical protein                              | 9.22E+08 | 9.64E+08 | 1.04482  |         |   |                                                                     |        |                                    |
| PA4646 | upp   | uracil phosphoribosyltransferase                  | 40475059 | 39227185 | 0.969169 | COG0035 | F | Uracil phosphoribosyltransferase                                    | K00761 | METABOLISM                         |
| PA4659 |       | probable transcriptional regulator                | 9.22E+08 | 0        | 0        |         |   |                                                                     |        |                                    |
| PA4661 | pagL  | Lipid A 3-O-deacylase                             | 3.98E+08 | 2.46E+08 | 0.61781  |         |   |                                                                     |        |                                    |
| PA4665 | prfA  | peptide chain release factor 1                    | 15121249 | 19493149 | 1.289123 | COG0216 | J | Protein chain release factor A                                      | K02835 | INFORMATION STORAGE AND PROCESSING |
| PA4670 | prs   | ribose-phosphate pyrophosphokinase                | 11156155 | 12142554 | 1.088417 | COG0462 | F | Phosphoribosylpyrophosphate synthetase                              | K00948 | METABOLISM                         |
| PA4670 | prs   | ribose-phosphate pyrophosphokinase                | 11156155 | 12142554 | 1.088417 | COG0462 | F | Phosphoribosylpyrophosphate synthetase                              | K00948 | METABOLISM                         |
| PA4671 |       | probable ribosomal protein L25                    | 4.62E+09 | 9.35E+09 | 2.024594 | COG1825 | J | Ribosomal protein L25 (general stress protein Ctc)                  | K02897 | INFORMATION STORAGE AND PROCESSING |
| PA4673 |       | conserved hypothetical protein                    | 0        | 66266109 | 1000     | COG0012 | J | "Predicted GTPase, probable translation factor"                     | K06942 | INFORMATION STORAGE AND PROCESSING |
| PA4674 |       | Antitoxin HigA                                    | 7195030  | 0        | 0        |         |   |                                                                     |        |                                    |
| PA4686 |       | hypothetical protein                              | 0        | 20027165 | 1000     | COG1196 | D | Chromosome segregation ATPases                                      | K03529 | CELLULAR PROCESSES AND SIGNALING   |
| PA4687 | hitA  | ferric iron-binding periplasmic protein HitA      | 86862974 | 60050029 | 0.691319 | COG1840 | P | "ABC-type Fe3 transport system, periplasmic component"              | K02055 | METABOLISM                         |
| PA4687 | hitA  | ferric iron-binding periplasmic protein HitA      | 86862974 | 60050029 | 0.691319 | COG1840 | P | "ABC-type Fe3 transport system, periplasmic component"              | K02012 | METABOLISM                         |
| PA4694 | ilvC  | ketol-acid reductoisomerase                       | 9.76E+08 | 2.12E+09 | 2.175506 | COG0059 | E | Ketol-acid reductoisomerase                                         | K00053 | METABOLISM                         |
| PA4694 | ilvC  | ketol-acid reductoisomerase                       | 9.76E+08 | 2.12E+09 | 2.175506 | COG0059 | H | Ketol-acid reductoisomerase                                         | K00053 | METABOLISM                         |
| PA4699 |       | hypothetical protein                              | 8.67E+08 | 7.01E+08 | 0.80847  | COG3071 | H |                                                                     |        |                                    |

|        |       |                                                |          |          |          |         |   |                                                                         |        |                                    |
|--------|-------|------------------------------------------------|----------|----------|----------|---------|---|-------------------------------------------------------------------------|--------|------------------------------------|
| PA4755 | greA  | transcription elongation factor GreA           | 9.39E+09 | 9.38E+09 | 0.998738 | COG0782 | K | Transcription elongation factor                                         | K06140 | INFORMATION STORAGE AND PROCESSING |
| PA4755 | greA  | transcription elongation factor GreA           | 9.39E+09 | 9.38E+09 | 0.998738 | COG0782 | K | Transcription elongation factor                                         | K03624 | INFORMATION STORAGE AND PROCESSING |
| PA4756 | carB  | carbamoylphosphate synthetase large subunit    | 0        | 50156815 | 1000     | COG0458 | E | Carbamoylphosphate synthase large subunit (split gene in MJ)            | K01955 | METABOLISM                         |
| PA4756 | carB  | carbamoylphosphate synthetase large subunit    | 0        | 50156815 | 1000     | COG0458 | F | Carbamoylphosphate synthase large subunit (split gene in MJ)            | K01955 | METABOLISM                         |
| PA4758 | carA  | carbamoyl-phosphate synthase small chain       | 3.55E+08 | 2.56E+08 | 0.723208 | COG0505 | E | Carbamoylphosphate synthase small subunit                               | K01956 | METABOLISM                         |
| PA4758 | carA  | carbamoyl-phosphate synthase small chain       | 3.55E+08 | 2.56E+08 | 0.723208 | COG0505 | F | Carbamoylphosphate synthase small subunit                               | K01956 | METABOLISM                         |
| PA4759 | dapB  | dihydrodipicolinate reductase                  | 0        | 21384862 | 1000     | COG0289 | E | Dihydrodipicolinate reductase                                           | K00215 | METABOLISM                         |
| PA4760 | dnaI  | DnaI protein                                   | 63214329 | 0.09E+08 | 8.045541 | COG0484 | O | DnaI-class molecular chaperone with C-terminal Zn finger domain         | K03686 | CELLULAR PROCESSES AND SIGNALING   |
| PA4761 | dnaK  | DnaK protein                                   | 2.57E+10 | 1.43E+10 | 0.556526 | COG0443 | O | Molecular chaperone                                                     | K04044 | CELLULAR PROCESSES AND SIGNALING   |
| PA4761 | dnaK  | DnaK protein                                   | 2.57E+10 | 1.43E+10 | 0.556526 | COG0443 | O | Molecular chaperone                                                     | K03283 | CELLULAR PROCESSES AND SIGNALING   |
| PA4761 | dnaK  | DnaK protein                                   | 2.57E+10 | 1.43E+10 | 0.556526 | COG0443 | O | Molecular chaperone                                                     | K04046 | CELLULAR PROCESSES AND SIGNALING   |
| PA4762 | grpE  | heat shock protein GrpE                        | 2.35E+10 | 1.34E+10 | 0.570748 | COG0576 | O | Molecular chaperone GrpE (heat shock protein)                           | K03687 | CELLULAR PROCESSES AND SIGNALING   |
| PA4764 | fur   | ferric uptake regulation protein               | 5320599  | 29872955 | 5.614585 | COG0735 | P | Fe2 <sup>+</sup> uptake regulation proteins                             | K09825 | METABOLISM                         |
| PA4764 | fur   | ferric uptake regulation protein               | 5320599  | 29872955 | 5.614585 | COG0735 | P | Fe2 <sup>+</sup> uptake regulation proteins                             | K09823 | METABOLISM                         |
| PA4764 | fur   | ferric uptake regulation protein               | 5320599  | 29872955 | 5.614585 | COG0735 | P | Fe2 <sup>+</sup> uptake regulation proteins                             | K03711 | METABOLISM                         |
| PA4765 | omlA  | Outer membrane lipoprotein OmlA precursor      | 23884048 | 77588383 | 3.248544 | COG2913 | J | Small protein A (tmRNA-binding)                                         | K06186 | INFORMATION STORAGE AND PROCESSING |
| PA4778 | cueR  | CueR                                           | 2.86E+08 | 2.8E+08  | 0.977857 |         |   |                                                                         |        |                                    |
| PA4811 | fdnH  | *nitrate-inducible formate dehydrogenase       | 15700216 | 0        | 0        | COG0437 | C | Fe-S-cluster-containing hydrogenase components 1                        | K00184 | METABOLISM                         |
| PA4811 | fdnH  | *nitrate-inducible formate dehydrogenase       | 15700216 | 0        | 0        | COG0437 | C | Fe-S-cluster-containing hydrogenase components 1                        | K04014 | METABOLISM                         |
| PA4811 | fdnH  | *nitrate-inducible formate dehydrogenase       | 15700216 | 0        | 0        | COG0437 | C | Fe-S-cluster-containing hydrogenase components 1                        | K07307 | METABOLISM                         |
| PA4811 | fdnH  | *nitrate-inducible formate dehydrogenase       | 15700216 | 0        | 0        | COG0437 | C | Fe-S-cluster-containing hydrogenase components 1                        | K00124 | METABOLISM                         |
| PA4842 |       | hypothetical protein                           | 2.3E+08  | 82450680 | 0.357788 |         |   |                                                                         |        |                                    |
| PA4845 | dipZ  | thiol:disulfide interchange protein DipZ       | 75578093 | 65650342 | 0.868642 | COG4232 | O | Thiol:disulfide interchange protein                                     | K04084 | CELLULAR PROCESSES AND SIGNALING   |
| PA4845 | dipZ  | thiol:disulfide interchange protein DipZ       | 75578093 | 65650342 | 0.868642 | COG4232 | C | Thiol:disulfide interchange protein                                     | K04084 | METABOLISM                         |
| PA4847 | accB  | biotin carboxyl carrier protein (BCCP)         | 1.53E+08 | 2.33E+08 | 1.521237 | COG0511 | I | Biotin carboxyl carrier protein                                         | K01960 | METABOLISM                         |
| PA4847 | accB  | biotin carboxyl carrier protein (BCCP)         | 1.53E+08 | 2.33E+08 | 1.521237 | COG0511 | I | Biotin carboxyl carrier protein                                         | K02160 | METABOLISM                         |
| PA4847 | accB  | biotin carboxyl carrier protein (BCCP)         | 1.53E+08 | 2.33E+08 | 1.521237 | COG0511 | I | Biotin carboxyl carrier protein                                         | K01571 | METABOLISM                         |
| PA4848 | accB  | biotin carboxylase                             | 54620340 | 2.57E+08 | 4.704749 | COG0439 | I | Biotin carboxylase                                                      | K01961 | METABOLISM                         |
| PA4848 | accB  | biotin carboxylase                             | 54620340 | 2.57E+08 | 4.704749 | COG0439 | I | Biotin carboxylase                                                      | K01959 | METABOLISM                         |
| PA4851 |       | hypothetical protein                           | 59176288 | 2.45E+08 | 4.137446 |         |   |                                                                         |        |                                    |
| PA4853 | fis   | DNA-binding protein Fis                        | 8.62E+08 | 4.79E+08 | 0.555318 | COG2901 | K | "Factor for inversion stimulation Fis, transcriptional activator"       | K03557 | INFORMATION STORAGE AND PROCESSING |
| PA4853 | fis   | DNA-binding protein Fis                        | 8.62E+08 | 4.79E+08 | 0.555318 | COG2901 | K | "Factor for inversion stimulation Fis, transcriptional activator"       | K03557 | INFORMATION STORAGE AND PROCESSING |
| PA4853 | fis   | DNA-binding protein Fis                        | 8.62E+08 | 4.79E+08 | 0.555318 | COG2901 | L | "Factor for inversion stimulation Fis, transcriptional activator"       | K03557 | INFORMATION STORAGE AND PROCESSING |
| PA4853 | fis   | DNA-binding protein Fis                        | 8.62E+08 | 4.79E+08 | 0.555318 | COG2901 | K | "Factor for inversion stimulation Fis, transcriptional activator"       | K03557 | INFORMATION STORAGE AND PROCESSING |
| PA4853 | fis   | DNA-binding protein Fis                        | 8.62E+08 | 4.79E+08 | 0.555318 | COG2901 | L | "Factor for inversion stimulation Fis, transcriptional activator"       | K03557 | INFORMATION STORAGE AND PROCESSING |
| PA4853 | fis   | DNA-binding protein Fis                        | 8.62E+08 | 4.79E+08 | 0.555318 | COG2901 | L | "Factor for inversion stimulation Fis, transcriptional activator"       | K03557 | INFORMATION STORAGE AND PROCESSING |
| PA4853 | fis   | DNA-binding protein Fis                        | 8.62E+08 | 4.79E+08 | 0.555318 | COG2901 | L | "Factor for inversion stimulation Fis, transcriptional activator"       | K03557 | INFORMATION STORAGE AND PROCESSING |
| PA4853 | fis   | DNA-binding protein Fis                        | 8.62E+08 | 4.79E+08 | 0.555318 | COG2901 | L | "Factor for inversion stimulation Fis, transcriptional activator"       | K03557 | INFORMATION STORAGE AND PROCESSING |
| PA4855 | purD  | phosphoribosylamine--glycine ligase            | 0        | 14713446 | 1000     | COG0151 | F | Phosphoribosylamine-glycine ligase                                      | K01945 | METABOLISM                         |
| PA4865 | ureA  | urease gamma subunit                           | 1.07E+08 | 2.15E+08 | 2.003667 | COG0831 | E | Urea amidohydrolase (urease) gamma subunit                              | K14048 | METABOLISM                         |
| PA4865 | ureA  | urease gamma subunit                           | 1.07E+08 | 2.15E+08 | 2.003667 | COG0831 | E | Urea amidohydrolase (urease) gamma subunit                              | K01430 | METABOLISM                         |
| PA4867 | ureB  | urease beta subunit                            | 1.77E+08 | 2.03E+08 | 1.146966 | COG0832 | E | Urea amidohydrolase (urease) beta subunit                               | K01429 | METABOLISM                         |
| PA4867 | ureB  | urease beta subunit                            | 1.77E+08 | 2.03E+08 | 1.146966 | COG0832 | E | Urea amidohydrolase (urease) beta subunit                               | K14048 | METABOLISM                         |
| PA4876 | osmE  | osmotically inducible lipoprotein OsmE         | 1.31E+09 | 2E+09    | 1.52307  | COG2913 | J | Small protein A (tmRNA-binding)                                         | K06186 | INFORMATION STORAGE AND PROCESSING |
| PA4880 |       | probable bacterioferritin                      | 1.68E+09 | 1.18E+09 | 0.703884 | COG1293 | P | Bacterioferritin (cytochrome b1)                                        | K03594 | METABOLISM                         |
| PA4885 | irIR  | two-component response regulator               | 0        | 96099769 | 1000     | COG0745 | K | Response regulators consisting of a CheY-like receiver domain           | K02483 | INFORMATION STORAGE AND PROCESSING |
| PA4885 | irIR  | two-component response regulator               | 0        | 96099769 | 1000     | COG0745 | T | Response regulators consisting of a CheY-like receiver domain           | K02483 | CELLULAR PROCESSES AND SIGNALING   |
| PA4907 |       | probable short-chain dehydrogenase             | 0        | 11643346 | 1000     | CG4221  | R | Short-chain alcohol dehydrogenase of unknown specificity                | K00540 | POORLY CHARACTERIZED               |
| PA4915 |       | probable chemotaxis transducer                 | 1.46E+08 | 1.04E+09 | 7.094225 | COG0840 | N | Methyl-accepting chemotaxis protein                                     | K03406 | CELLULAR PROCESSES AND SIGNALING   |
| PA4915 |       | probable chemotaxis transducer                 | 1.46E+08 | 1.04E+09 | 7.094225 | COG0840 | T | Methyl-accepting chemotaxis protein                                     | K03406 | CELLULAR PROCESSES AND SIGNALING   |
| PA4920 | nadE  | NH3-dependent NAD synthetase                   | 1.63E+09 | 83573061 | 0.051281 | COG0171 | H | NAD synthase                                                            | K01916 | METABOLISM                         |
| PA4920 | nadE  | NH3-dependent NAD synthetase                   | 1.63E+09 | 83573061 | 0.051281 | COG0171 | H | NAD synthase                                                            | K01950 | METABOLISM                         |
| PA4922 | azu   | azurin precursor                               | 2.45E+10 | 1.78E+10 | 0.724925 |         |   |                                                                         |        |                                    |
| PA4932 | rplI  | 50S ribosomal protein L9                       | 4.88E+09 | 9.65E+09 | 1.977174 | COG0359 | J | Ribosomal protein L9                                                    | K02939 | INFORMATION STORAGE AND PROCESSING |
| PA4934 | rpsR  | 30S ribosomal protein S18                      | 3.75E+08 | 1.15E+09 | 3.068901 | COG0238 | J | Ribosomal protein S18                                                   | K02963 | INFORMATION STORAGE AND PROCESSING |
| PA4935 | rpsF  | 30S ribosomal protein S6                       | 2.28E+10 | 2.29E+10 | 1.004138 | COG0360 | J | Ribosomal protein S6                                                    | K02990 | INFORMATION STORAGE AND PROCESSING |
| PA4936 |       | probable rRNA methylase                        | 7435867  | 0        | 0        | COG0566 | J | rRNA methylases                                                         | K00556 | INFORMATION STORAGE AND PROCESSING |
| PA4936 |       | probable rRNA methylase                        | 7435867  | 0        | 0        | COG0566 | J | rRNA methylases                                                         | K03437 | INFORMATION STORAGE AND PROCESSING |
| PA4936 |       | probable rRNA methylase                        | 7435867  | 0        | 0        | COG0566 | J | rRNA methylases                                                         | K03218 | INFORMATION STORAGE AND PROCESSING |
| PA4936 |       | probable rRNA methylase                        | 7435867  | 0        | 0        | COG0566 | J | rRNA methylases                                                         | K00599 | INFORMATION STORAGE AND PROCESSING |
| PA4937 | nrn   | exoribonuclease RNase R                        | 9.27E+08 | 2.09E+09 | 2.252897 | COG0557 | K | Exoribonuclease R                                                       | K01147 | INFORMATION STORAGE AND PROCESSING |
| PA4937 | nrn   | exoribonuclease RNase R                        | 9.27E+08 | 2.09E+09 | 2.252897 | COG0557 | K | Exoribonuclease R                                                       | K12573 | INFORMATION STORAGE AND PROCESSING |
| PA4938 | purA  | adenylosuccinate synthetase                    | 90573771 | 1.12E+08 | 1.234677 | CG01014 | F | Adenylosuccinate synthase                                               | K01939 | METABOLISM                         |
| PA4941 | hflC  | protease subunit HflC                          | 0        | 96029761 | 1000     | COG0330 | O | "Membrane protease subunits, stomatin/prohibitin homologs               | K04088 | CELLULAR PROCESSES AND SIGNALING   |
| PA4941 | hflC  | protease subunit HflC                          | 0        | 96029761 | 1000     | COG0330 | O | "Membrane protease subunits, stomatin/prohibitin homologs               | K04088 | CELLULAR PROCESSES AND SIGNALING   |
| PA4942 | hflK  | protease subunit HflK                          | 8.99E+09 | 6.46E+09 | 0.718009 | COG0330 | O | "Membrane protease subunits, stomatin/prohibitin homologs               | K04088 | CELLULAR PROCESSES AND SIGNALING   |
| PA4942 | hflK  | protease subunit HflK                          | 8.99E+09 | 6.46E+09 | 0.718009 | COG0330 | O | "Membrane protease subunits, stomatin/prohibitin homologs               | K04088 | CELLULAR PROCESSES AND SIGNALING   |
| PA4944 | hflQ  | HflQ                                           | 1.17E+09 | 3.99E+09 | 3.423517 | COG1923 | R | Uncharacterized host factor I protein                                   | K03666 | POORLY CHARACTERIZED               |
| PA4951 | orn   | oligoribonuclease                              | 84823603 | 37158571 | 0.438069 | COG1949 | A | Oligoribonuclease (3'->5' exoribonuclease)                              | K13288 | INFORMATION STORAGE AND PROCESSING |
| PA4953 | motB  | chemotaxis protein MotB                        | 21503383 | 3.24E+08 | 15.07846 | COG1360 | N | Flagellar motor protein                                                 | K02557 | CELLULAR PROCESSES AND SIGNALING   |
| PA4953 | motB  | chemotaxis protein MotB                        | 21503383 | 3.24E+08 | 15.07846 | COG1360 | N | Flagellar motor protein                                                 | K11892 | CELLULAR PROCESSES AND SIGNALING   |
| PA4956 | rhaD  | thiol:thiol-cyanide sulfurtransferase          | 78361211 | 41723825 | 0.532455 | COG2897 | P | Rhodanese-related sulfurtransferase                                     | K01011 | METABOLISM                         |
| PA4963 |       | hypothetical protein                           | 40905957 | 3.23E+08 | 7.885884 | COG3009 | S | Uncharacterized protein conserved in bacteria                           | K09857 | POORLY CHARACTERIZED               |
| PA4974 |       | probable outer membrane protein precursor      | 2.51E+09 | 2.61E+09 | 1.040435 | COG1538 | U | Outer membrane protein                                                  | K12340 | CELLULAR PROCESSES AND SIGNALING   |
| PA4974 |       | probable outer membrane protein precursor      | 2.51E+09 | 2.61E+09 | 1.040435 | COG1538 | M | Outer membrane protein                                                  | K03287 | CELLULAR PROCESSES AND SIGNALING   |
| PA4974 |       | probable outer membrane protein precursor      | 2.51E+09 | 2.61E+09 | 1.040435 | COG1538 | M | Outer membrane protein                                                  | K03287 | CELLULAR PROCESSES AND SIGNALING   |
| PA4976 | aruH  | *Arginine:Pyruvate Transaminas                 | 1.2E+08  | 0        | 0        | COG0436 | E | Aspartate/tyrosine/aromatic aminotransferase                            | K00812 | METABOLISM                         |
| PA4976 | aruH  | *Arginine:Pyruvate Transaminas                 | 1.2E+08  | 0        | 0        | COG0436 | E | Aspartate/tyrosine/aromatic aminotransferase                            | K14260 | METABOLISM                         |
| PA4979 |       | probable acyl-CoA dehydrogenase                | 0        | 2.21E+08 | 1000     | COG1960 | I | Acyl-CoA dehydrogenases                                                 | K00249 | METABOLISM                         |
| PA4979 |       | probable acyl-CoA dehydrogenase                | 0        | 2.21E+08 | 1000     | COG1960 | I | Acyl-CoA dehydrogenases                                                 | K00257 | METABOLISM                         |
| PA5015 | aceE  | pyruvate dehydrogenase                         | 1.82E+08 | 2.59E+08 | 1.420444 | COG2609 | C | "Pyruvate/2-oxoglutarate dehydrogenase complex, dehydrogenase [E1] comp | K00613 | METABOLISM                         |
| PA5016 | aceF  | dihydrolipoamide acetyltransferase             | 3.74E+09 | 2.29E+09 | 0.614161 | COG0508 | C | "Pyruvate/2-oxoglutarate dehydrogenase complex, dihydrolipo             | K00627 | METABOLISM                         |
| PA5016 | aceF  | dihydrolipoamide acetyltransferase             | 3.74E+09 | 2.29E+09 | 0.614161 | COG0508 | C | "Pyruvate/2-oxoglutarate dehydrogenase complex, dihydrolipo             | K00658 | METABOLISM                         |
| PA5016 | aceF  | dihydrolipoamide acetyltransferase             | 3.74E+09 | 2.29E+09 | 0.614161 | COG0508 | C | "Pyruvate/2-oxoglutarate dehydrogenase complex, dihydrolipo             | K00699 | METABOLISM                         |
| PA5019 |       | conserved hypothetical protein                 | 45431225 | 0        | 0        | COG2961 | R | Protein involved in catabolism of external DNA                          | K07115 | POORLY CHARACTERIZED               |
| PA5027 |       | hypothetical protein                           | 5.08E+08 | 5.11E+08 | 1.004232 | COG0589 | T | Universal stress protein UspA and related nucleotide-binding            | K06149 | CELLULAR PROCESSES AND SIGNALING   |
| PA5042 | pilO  | type 4 fimbrial biogenesis protein PilO        | 31906649 | 28842412 | 0.903962 | COG3167 | N | Tip pilus assembly protein PilO                                         | K02664 | CELLULAR PROCESSES AND SIGNALING   |
| PA5042 | pilO  | type 4 fimbrial biogenesis protein PilO        | 31906649 | 28842412 | 0.903962 | COG3167 | N | Tip pilus assembly protein PilO                                         | K02664 | CELLULAR PROCESSES AND SIGNALING   |
| PA5046 |       | malic enzyme                                   | 3.6E+08  | 1.43E+09 | 3.980084 | COG0281 | C | Malic enzyme                                                            | K00029 | METABOLISM                         |
| PA5046 |       | malic enzyme                                   | 3.6E+08  | 1.43E+09 | 3.980084 | COG0281 | C | Malic enzyme                                                            | K00027 | METABOLISM                         |
| PA5049 | rpmE  | 50S ribosomal protein L31                      | 3.54E+09 | 6.01E+08 | 0.169918 | COG0254 | J | Ribosomal protein L31                                                   | K02909 | INFORMATION STORAGE AND PROCESSING |
| PA5051 | argS  | arginyl-tRNA synthetase                        | 28010731 | 89181655 | 1.383839 | COG0018 | J | Arginyl-tRNA synthetase                                                 | K01887 | INFORMATION STORAGE AND PROCESSING |
| PA5054 | hslU  | heat shock protein HslU                        | 1.63E+08 | 3.51E+08 | 2.159422 | COG1220 | O | "ATP-dependent protease HslU (ClpYQ), ATPase subunit"                   | K03667 | CELLULAR PROCESSES AND SIGNALING   |
| PA5058 | phaC2 | poly(3-hydroxyalkanoic acid) synthase 2        | 0        | 7.11E+08 | 1000     | COG3243 | I | Poly(3-hydroxyalkanoate) synthetase                                     | K03821 | METABOLISM                         |
| PA5058 | phaC2 | poly(3-hydroxyalkanoic acid) synthase 2        | 0        | 7.11E+08 | 1000     | COG3243 | I | Poly(3-hydroxyalkanoate) synthetase                                     | K03822 | METABOLISM                         |
| PA5060 | phaF  | polyhydroxyalkanoate synthesis protein PhaF    | 4.82E+09 | 3.38E+09 | 0.702177 |         |   |                                                                         |        |                                    |
| PA5061 |       | conserved hypothetical protein                 | 57491760 | 29415722 | 0.511651 |         |   |                                                                         |        |                                    |
| PA5062 |       | conserved hypothetical protein                 | 0        | 36130889 | 1000     |         |   |                                                                         |        |                                    |
| PA5063 | ubiE  | ubiquinone biosynthesis methyltransferase UbiE | 2.28E+08 | 2.66E+08 | 1.166716 | COG2226 | H | Methylase involved in ubiquinone/menaquinone biosynthesis               | K03183 | METABOLISM                         |
| PA5064 |       | hypothetical protein                           | 1.66E+08 | 0        | 0        | COG3165 | S | Uncharacterized protein conserved in bacteria                           | K03690 | POORLY CHARACTERIZED               |
| PA5065 | ubiB  | ubiquinone biosynthetic protein UbiB           | 3.47E+08 | 1.61E+08 | 0.464939 | COG0661 | R | Predicted unusual protein kinase                                        | K08869 | POORLY CHARACTERIZED               |
| PA5065 | ubiB  | ubiquinone biosynthetic protein UbiB           | 3.47E+08 | 1.61E+08 | 0.464939 | COG0661 | R | Predicted unusual protein kinase                                        | K03688 | POORLY CHARACTERIZED               |
| PA5067 | hisE  | phosphoribosyl-ATP pyrophosphohydrolase        | 3.39E+08 | 2.05E+08 | 0.606148 | COG0140 | E | Phosphoribosyl-ATP pyrophosphohydrolase                                 | K11755 | METABOLISM                         |
| PA5067 | hisE  | phosphoribosyl-ATP pyrophosphohydrolase        | 3.39E+08 | 2.05E+08 | 0.606148 | COG014  |   |                                                                         |        |                                    |

|        |       |                                                                |          |          |          |         |   |                                                                 |         |                                    |
|--------|-------|----------------------------------------------------------------|----------|----------|----------|---------|---|-----------------------------------------------------------------|---------|------------------------------------|
| PA5129 | grxC  | GrxC                                                           | 10253117 | 0        | 0        | COG0695 | O | Glutaredoxin and related proteins                               | K06191  | CELLULAR PROCESSES AND SIGNALING   |
| PA5129 | grxC  | GrxC                                                           | 10253117 | 0        | 0        | COG0695 | O | Glutaredoxin and related proteins                               | K03674  | CELLULAR PROCESSES AND SIGNALING   |
| PA5129 | grxC  | GrxC                                                           | 10253117 | 0        | 0        | COG0695 | O | Glutaredoxin and related proteins                               | K03676  | CELLULAR PROCESSES AND SIGNALING   |
| PA5130 |       | conserved hypothetical protein                                 | 2.62E+09 | 2.01E+09 | 0.767173 | COG0607 | P | Rhodanese-related sulfurtransferase                             | K03151  | METABOLISM                         |
| PA5131 | pgm   | phosphoglycerate mutase                                        | 0        | 47150248 | 1000     | COG0696 | G | Phosphoglyceromutase                                            | K18134  | METABOLISM                         |
| PA5133 |       | conserved hypothetical protein                                 | 1.84E+08 | 91685672 | 0.498448 |         |   |                                                                 |         |                                    |
| PA5134 | ctpA  | "carboxyl-terminal processing protease                         | 31858923 | 86020620 | 2.700048 | COG0793 | M | Periplasmic protease                                            | K03797  | CELLULAR PROCESSES AND SIGNALING   |
| PA5135 |       | conserved hypothetical protein                                 | 16504049 | 0        | 0        | COG2861 | S | Uncharacterized protein conserved in bacteria                   | K09798  | POORLY CHARACTERIZED               |
| PA5141 | hisA  | phosphoribosylformimino-5-aminoimidazole carboxamide           | 1.16E+08 | 2.68E+08 | 2.308401 | COG1016 | E | Phosphoribosylformimino-5-aminoimidazole carboxamide rib        | K01817  | METABOLISM                         |
| PA5141 | hisA  | phosphoribosylformimino-5-aminoimidazole carboxamide           | 1.16E+08 | 2.68E+08 | 2.308401 | COG1016 | E | Phosphoribosylformimino-5-aminoimidazole carboxamide rib        | K01814  | METABOLISM                         |
| PA5146 |       | hypothetical protein                                           | 56265454 | 0        | 0        | COG2982 | M | Uncharacterized protein involved in outer membrane biogene      | K07289  | CELLULAR PROCESSES AND SIGNALING   |
| PA5146 |       | hypothetical protein                                           | 56265454 | 0        | 0        | COG2982 | M | Uncharacterized protein involved in outer membrane biogene      | K07290  | CELLULAR PROCESSES AND SIGNALING   |
| PA5148 |       | conserved hypothetical protein                                 | 1.82E+09 | 1.38E+09 | 0.75572  |         |   |                                                                 |         |                                    |
| PA5161 | rmIB  | "dTDP-D-glucose 4                                              | 0        | 19243681 | 1000     | COG1088 | M | "dTDP-D-glucose 4,6-dehydratase"                                | K01710  | CELLULAR PROCESSES AND SIGNALING   |
| PA5171 | arcA  | arginine deiminase                                             | 96118557 | 1.14E+09 | 11.88473 | COG2235 | E | Arginine deiminase                                              | K01478  | METABOLISM                         |
| PA5172 | arcB  | "ornithine carbamoyltransferase                                | 3.35E+08 | 4.53E+09 | 13.51179 | COG0078 | E | Ornithine carbamoyltransferase                                  | K00611  | METABOLISM                         |
| PA5173 | arcC  | carbamate kinase                                               | 4.23E+08 | 2.63E+09 | 6.210332 | COG0549 | E | Carbamate kinase                                                | K00926  | METABOLISM                         |
| PA5178 |       | conserved hypothetical protein                                 | 1.63E+10 | 1.16E+10 | 0.711563 |         |   |                                                                 |         |                                    |
| PA5192 | pckA  | phosphoenolpyruvate carboxykinase                              | 0        | 27157861 | 1000     | COG1866 | C | Phosphoenolpyruvate carboxykinase (ATP)                         | K01610  | METABOLISM                         |
| PA5200 | amgR  | AmgR                                                           | 1.71E+08 | 76408189 | 0.44604  | COG0745 | T | Response regulators consisting of a CheY-like receiver domain   | K02483  | CELLULAR PROCESSES AND SIGNALING   |
| PA5200 | amgR  | AmgR                                                           | 1.71E+08 | 76408189 | 0.44604  | COG0745 | K | Response regulators consisting of a CheY-like receiver domain   | K02483  | INFORMATION STORAGE AND PROCESSING |
| PA5201 |       | conserved hypothetical protein                                 | 69782612 | 1.51E+08 | 2.165771 | COG2183 | K | Transcriptional accessory protein                               | K11292  | INFORMATION STORAGE AND PROCESSING |
| PA5201 |       | conserved hypothetical protein                                 | 69782612 | 1.51E+08 | 2.165771 | COG2183 | K | Transcriptional accessory protein                               | K06959  | INFORMATION STORAGE AND PROCESSING |
| PA5207 |       | probable phosphate transporter                                 | 0        | 6637345  | 1000     | COG0306 | P | Phosphate/sulphate permeases                                    | K03406  | METABOLISM                         |
| PA5214 | gcvH1 | glycine cleavage system protein H1                             | 6.03E+08 | 6.25E+08 | 1.036619 | COG0509 | E | Glycine cleavage system H protein (lipate-binding)              | K02437  | METABOLISM                         |
| PA5225 |       | hypothetical protein                                           | 76478271 | 38620000 | 0.50498  | COG0379 | S | Uncharacterized protein conserved in bacteria                   | K09895  | POORLY CHARACTERIZED               |
| PA5226 |       | hypothetical protein                                           | 68984141 | 5.05E+08 | 7.323623 |         |   |                                                                 |         |                                    |
| PA5227 |       | conserved hypothetical protein                                 | 7.31E+08 | 9.5E+08  | 1.299332 | COG3027 | S | Uncharacterized protein conserved in bacteria                   | K09888  | POORLY CHARACTERIZED               |
| PA5232 |       | conserved hypothetical protein(Biotin_lipoyl_2 domain-contains | 0        | 1.36E+08 | 1000     | COG0845 | M | Membrane-fusion protein                                         | K02005  | CELLULAR PROCESSES AND SIGNALING   |
| PA5232 |       | conserved hypothetical protein                                 | 0        | 1.36E+08 | 1000     | COG0845 | M | Membrane-fusion protein                                         | K03585  | CELLULAR PROCESSES AND SIGNALING   |
| PA5232 |       | conserved hypothetical protein                                 | 0        | 1.36E+08 | 1000     | COG0845 | M | Membrane-fusion protein                                         | K01993  | CELLULAR PROCESSES AND SIGNALING   |
| PA5232 |       | conserved hypothetical protein                                 | 0        | 1.36E+08 | 1000     | COG0845 | M | Membrane-fusion protein                                         | K02022  | CELLULAR PROCESSES AND SIGNALING   |
| PA5233 |       | hypothetical protein                                           | 5.39E+08 | 3.57E+08 | 0.66203  | COG1580 | N | Flagellar basal body-associated protein                         | K02415  | CELLULAR PROCESSES AND SIGNALING   |
| PA5239 | rho   | transcription termination factor Rho                           | 2.31E+08 | 1.53E+09 | 6.614102 | COG1158 | K | Transcription termination factor                                | K03628  | INFORMATION STORAGE AND PROCESSING |
| PA5240 | trxA  | thioredoxin                                                    | 1.9E+10  | 1.51E+10 | 0.793673 | COG3118 | O | Thioredoxin domain-containing protein                           | K05838  | CELLULAR PROCESSES AND SIGNALING   |
| PA5243 | hemB  | delta-aminolevulinic acid dehydratase                          | 4.34E+09 | 18582447 | 4.28E+03 | COG1013 | H | Delta-aminolevulinic acid dehydratase                           | K01698  | METABOLISM                         |
| PA5245 |       | conserved hypothetical protein                                 | 1.52E+08 | 30050609 | 0.197181 |         |   |                                                                 |         |                                    |
| PA5253 | algP  | alginate regulatory protein AlgP                               | 4.8E+09  | 3.46E+08 | 7.20E-02 |         |   |                                                                 |         |                                    |
| PA5255 | algQ  | Alginate regulatory protein AlgQ                               | 0        | 73528540 | 1000     | COG3160 | K | Regulator of sigma D                                            | K07740  | INFORMATION STORAGE AND PROCESSING |
| PA5258 |       | hypothetical protein                                           | 9.63E+08 | 6.18E+08 | 0.64124  | COG2959 | H | Uncharacterized enzyme of heme biosynthesis                     | K13543  | METABOLISM                         |
| PA5258 |       | hypothetical protein                                           | 9.63E+08 | 6.18E+08 | 0.64124  | COG2959 | H | Uncharacterized enzyme of heme biosynthesis                     | K02496  | METABOLISM                         |
| PA5263 | argH  | argininosuccinate lyase                                        | 0        | 3.22E+08 | 1000     | COG1615 | E | Argininosuccinate lyase                                         | K01755  | METABOLISM                         |
| PA5269 |       | hypothetical protein                                           | 2.48E+08 | 3.68E+08 | 1.482267 |         |   |                                                                 |         |                                    |
| PA5271 |       | hypothetical protein                                           | 81261677 | 28793481 | 0.35433  |         |   |                                                                 |         |                                    |
| PA5274 | rnk   | nucleoside diphosphate kinase regulator                        | 34566966 | 0        | 0        | COG0782 | K | Transcription elongation factor                                 | K04760  | INFORMATION STORAGE AND PROCESSING |
| PA5274 | rnk   | nucleoside diphosphate kinase regulator                        | 34566966 | 0        | 0        | COG0782 | K | Transcription elongation factor                                 | K03624  | INFORMATION STORAGE AND PROCESSING |
| PA5274 | rnk   | nucleoside diphosphate kinase regulator                        | 34566966 | 0        | 0        | COG0782 | K | Transcription elongation factor                                 | K06140  | INFORMATION STORAGE AND PROCESSING |
| PA5275 |       | conserved hypothetical protein                                 | 0        | 53151337 | 1000     | COG1965 | P | "Protein implicated in iron transport, frataxin homolog"        | K06202  | METABOLISM                         |
| PA5275 |       | conserved hypothetical protein                                 | 0        | 53151337 | 1000     | COG1965 | P | "Protein implicated in iron transport, frataxin homolog"        | K06202  | METABOLISM                         |
| PA5275 |       | conserved hypothetical protein                                 | 0        | 53151337 | 1000     | COG1965 | P | "Protein implicated in iron transport, frataxin homolog"        | K06202  | METABOLISM                         |
| PA5275 |       | conserved hypothetical protein                                 | 0        | 53151337 | 1000     | COG1965 | P | "Protein implicated in iron transport, frataxin homolog"        | K06202  | METABOLISM                         |
| PA5277 | lysA  | diaminopimelate decarboxylase                                  | 0        | 18061379 | 1000     | COG0019 | E | Diaminopimelate decarboxylase                                   | K13747  | METABOLISM                         |
| PA5277 | lysA  | diaminopimelate decarboxylase                                  | 0        | 18061379 | 1000     | COG0019 | E | Diaminopimelate decarboxylase                                   | K01581  | METABOLISM                         |
| PA5277 | lysA  | diaminopimelate decarboxylase                                  | 0        | 18061379 | 1000     | COG0019 | E | Diaminopimelate decarboxylase                                   | K01586  | METABOLISM                         |
| PA5285 | sutA  | SutA                                                           | 3.01E+09 | 3.06E+09 | 1.017789 |         |   |                                                                 |         |                                    |
| PA5288 | glnK  | nitrogen regulatory protein P-II 2                             | 3.63E+09 | 2.39E+09 | 0.658651 | COG0347 | E | Nitrogen regulatory protein PII                                 | K04751  | METABOLISM                         |
| PA5288 | glnK  | nitrogen regulatory protein P-II 2                             | 3.63E+09 | 2.39E+09 | 0.658651 | COG0347 | E | Nitrogen regulatory protein PII                                 | K04752  | METABOLISM                         |
| PA5289 |       | hypothetical protein                                           | 1.16E+08 | 75468936 | 0.650873 | COG2960 | S | Uncharacterized protein conserved in bacteria                   | K09806  | POORLY CHARACTERIZED               |
| PA5298 |       | xanthine phosphoribosyltransferase                             | 37986072 | 16021822 | 0.421781 | COG0503 | F | Adenine/guanine phosphoribosyltransferases and related PRP      | K00759  | METABOLISM                         |
| PA5298 |       | xanthine phosphoribosyltransferase                             | 37986072 | 16021822 | 0.421781 | COG0503 | F | Adenine/guanine phosphoribosyltransferases and related PRP      | K003816 | METABOLISM                         |
| PA5298 |       | xanthine phosphoribosyltransferase                             | 37986072 | 16021822 | 0.421781 | COG0503 | F | Adenine/guanine phosphoribosyltransferases and related PRP      | K00769  | METABOLISM                         |
| PA5298 |       | xanthine phosphoribosyltransferase                             | 37986072 | 16021822 | 0.421781 | COG0503 | F | Adenine/guanine phosphoribosyltransferases and related PRP      | K00965  | METABOLISM                         |
| PA5300 | cycB  | cytochrome c5                                                  | 9.5E+09  | 8.29E+09 | 0.87209  |         |   |                                                                 |         |                                    |
| PA5303 |       | conserved hypothetical protein                                 | 55218970 | 54696926 | 0.990546 | COG0251 | J | "Putative translation initiation inhibitor, yjgF family"        | K07567  | INFORMATION STORAGE AND PROCESSING |
| PA5305 |       | conserved hypothetical protein                                 | 2.78E+08 | 13029077 | 4.69E-02 | COG3784 | S | Uncharacterized protein conserved in bacteria                   | K09978  | POORLY CHARACTERIZED               |
| PA5312 | pauC  | Aldehyde dehydrogenase                                         | 0        | 8114101  | 1000     | COG1012 | C | NAD-dependent aldehyde dehydrogenases                           | K00128  | METABOLISM                         |
| PA5312 | pauC  | Aldehyde dehydrogenase                                         | 0        | 8114101  | 1000     | COG1012 | C | NAD-dependent aldehyde dehydrogenases                           | K00135  | METABOLISM                         |
| PA5312 | pauC  | Aldehyde dehydrogenase                                         | 0        | 8114101  | 1000     | COG1012 | C | NAD-dependent aldehyde dehydrogenases                           | K00140  | METABOLISM                         |
| PA5312 | pauC  | Aldehyde dehydrogenase                                         | 0        | 8114101  | 1000     | COG1012 | C | NAD-dependent aldehyde dehydrogenases                           | K00130  | METABOLISM                         |
| PA5315 | rpmG  | S05 ribosomal protein L33                                      | 7.92E+09 | 5.4E+09  | 0.681843 | COG0267 | J | Ribosomal protein L33                                           | K02913  | INFORMATION STORAGE AND PROCESSING |
| PA5316 | rpmB  | S05 ribosomal protein L28                                      | 0        | 56720674 | 1000     | COG0227 | J | Ribosomal protein L28                                           | K02902  | INFORMATION STORAGE AND PROCESSING |
| PA5322 | algC  | phosphomannomutase AlgC                                        | 0        | 64005388 | 1000     | COG1109 | G | Phosphomannomutase                                              | K01840  | METABOLISM                         |
| PA5322 | algC  | phosphomannomutase AlgC                                        | 0        | 64005388 | 1000     | COG1109 | G | Phosphomannomutase                                              | K03431  | METABOLISM                         |
| PA5322 | algC  | phosphomannomutase AlgC                                        | 0        | 64005388 | 1000     | COG1109 | G | Phosphomannomutase                                              | K01835  | METABOLISM                         |
| PA5323 | argB  | acetylglutamate kinase                                         | 3.57E+08 | 5.42E+08 | 1.516337 | COG0548 | E | Signal transduction histidine kinase regulating C4-dicarboxylat | K10125  | CELLULAR PROCESSES AND SIGNALING   |
| PA5323 | argB  | acetylglutamate kinase                                         | 3.57E+08 | 5.42E+08 | 1.516337 | COG0548 | E | Acetylglutamate kinase                                          | K00619  | METABOLISM                         |
| PA5330 |       | hypothetical protein                                           | 2.64E+08 | 32019556 | 0.121139 |         |   |                                                                 | K00930  | METABOLISM                         |
| PA5336 | gmK   | guanylate kinase                                               | 0        | 2.47E+08 | 1000     | COG0194 | F | Guanylate kinase                                                | K00942  | METABOLISM                         |
| PA5337 | rpoZ  | RNA polymerase omega subunit                                   | 3.79E+09 | 3.1E+09  | 0.818469 | COG1758 | K | "DNA-directed RNA polymerase, subunit K/omega"                  | K03060  | INFORMATION STORAGE AND PROCESSING |
| PA5337 | rpoZ  | RNA polymerase omega subunit                                   | 3.79E+09 | 3.1E+09  | 0.818469 | COG1758 | K | "DNA-directed RNA polymerase, subunit K/omega"                  | K03014  | INFORMATION STORAGE AND PROCESSING |
| PA5337 | rpoZ  | RNA polymerase omega subunit                                   | 3.79E+09 | 3.1E+09  | 0.818469 | COG1758 | K | "DNA-directed RNA polymerase, subunit K/omega"                  | K03055  | INFORMATION STORAGE AND PROCESSING |
| PA5339 |       | conserved hypothetical protein                                 | 1.05E+10 | 1.98E+09 | 0.188597 | COG0251 | J | "Putative translation initiation inhibitor, yjgF family"        | K07567  | INFORMATION STORAGE AND PROCESSING |
| PA5340 |       | hypothetical protein                                           | 1.2E+08  | 1.88E+08 | 1.568686 |         |   |                                                                 |         |                                    |
| PA5348 |       | probable DNA-binding protein                                   | 2.36E+09 | 8.26E+08 | 0.34945  | COG0776 | L | Bacterial nucleoid DNA-binding protein                          | K05788  | INFORMATION STORAGE AND PROCESSING |
| PA5348 |       | probable DNA-binding protein                                   | 2.36E+09 | 8.26E+08 | 0.34945  | COG0776 | L | Bacterial nucleoid DNA-binding protein                          | K04764  | INFORMATION STORAGE AND PROCESSING |
| PA5348 |       | probable DNA-binding protein                                   | 2.36E+09 | 8.26E+08 | 0.34945  | COG0776 | L | Bacterial nucleoid DNA-binding protein                          | K05787  | INFORMATION STORAGE AND PROCESSING |
| PA5348 |       | probable DNA-binding protein                                   | 2.36E+09 | 8.26E+08 | 0.34945  | COG0776 | L | Bacterial nucleoid DNA-binding protein                          | K03530  | INFORMATION STORAGE AND PROCESSING |
| PA5355 | gldC  | glycolate oxidase subunit GldC                                 | 3.05E+08 | 6.2E+08  | 2.032656 | COG0277 | C | FAD/FMN-containing dehydrogenases                               | K11472  | METABOLISM                         |
| PA5355 | gldC  | glycolate oxidase subunit GldC                                 | 3.05E+08 | 6.2E+08  | 2.032656 | COG0277 | C | FAD/FMN-containing dehydrogenases                               | K00102  | METABOLISM                         |
| PA5355 | gldC  | glycolate oxidase subunit GldC                                 | 3.05E+08 | 6.2E+08  | 2.032656 | COG0277 | C | FAD/FMN-containing dehydrogenases                               | K00104  | METABOLISM                         |
| PA5355 | gldC  | glycolate oxidase subunit GldC                                 | 3.05E+08 | 6.2E+08  | 2.032656 | COG0277 | C | FAD/FMN-containing dehydrogenases                               | K06911  | METABOLISM                         |
| PA5359 |       | hypothetical protein                                           | 11171170 | 20512100 | 1.836164 |         |   |                                                                 |         |                                    |
| PA5381 |       | hypothetical protein                                           | 1.04E+08 | 0        | 0        |         |   |                                                                 |         |                                    |
| PA5406 |       | hypothetical protein                                           | 1.91E+08 | 1.74E+08 | 0.911167 |         |   |                                                                 |         |                                    |
| PA5414 |       | hypothetical protein                                           | 1.19E+08 | 2.21E+08 | 1.85829  |         |   |                                                                 |         |                                    |
| PA5426 | purE  | "phosphoribosylaminoimidazole carboxylase                      | 0        | 28610859 | 1000     | COG0041 | F | Phosphoribosylcarboxyaminoimidazole (NCAIR) mutase              | K01588  | METABOLISM                         |
| PA5427 | adhA  | alcohol dehydrogenase                                          | 0        | 90585723 | 1000     | COG1064 | R | Zn-dependent alcohol dehydrogenases                             | K13979  | POORLY CHARACTERIZED               |
| PA5427 | adhA  | alcohol dehydrogenase                                          | 0        | 90585723 | 1000     | COG1064 | R | Zn-dependent alcohol dehydrogenases                             | K13953  | POORLY CHARACTERIZED               |
| PA5427 | adhA  | alcohol dehydrogenase                                          | 0        | 90585723 | 1000     | COG1064 | R | Zn-dependent alcohol dehydrogenases                             | K00001  | POORLY CHARACTERIZED               |
| PA5429 | aspA  | aspartate ammonia-lyase                                        | 7051843  | 0        | 0        | COG1027 | E | Aspartate ammonia-lyase                                         | K01744  | METABOLISM                         |
| PA5435 |       | probable transcarboxylase subunit                              | 0        | 46509866 | 1000     | COG0511 | I | Biotin carboxyl carrier protein                                 | K01960  | METABOLISM                         |
| PA5435 |       | probable transcarboxylase subunit                              | 0        | 46509866 | 1000     | COG0511 | I | Pyruvate/oxaloacetate carboxyltransferase                       | K01571  | METABOLISM                         |
| PA5435 |       | probable transcarboxylase subunit                              | 0        | 46509866 | 1000     | COG0511 | I | Biotin carboxyl carrier protein                                 | K02160  | METABOLISM                         |
| PA5435 |       | probable transcarboxylase subunit                              | 0        | 46509866 | 1000     | COG0511 | I | Biotin carboxyl carrier protein                                 | K01571  | METABOLISM                         |
| PA5435 |       | probable transcarboxylase subunit                              | 0        | 46509866 | 1000     | COG0511 | I | Pyruvate/oxaloacetate carboxyltransferase                       | K01960  | METABOLISM                         |
| PA5441 |       | hypothetical protein                                           | 94230702 | 0        | 0        |         |   |                                                                 |         |                                    |
| PA5472 |       | hypothetical protein                                           | 2.02E+08 | 33263886 | 0.164912 | COG0834 | E | "ABC-type amino acid transport/signal transduction systems, I   | K02030  | METABOLISM                         |
| PA5472 |       | hypothetical protein                                           | 2.02E+08 | 33263886 | 0.164912 | COG0834 | T | "ABC-type amino acid transport/signal transduction systems, I   | K02030  | CELLULAR PROCESSES AND SIGNALING   |
| PA5481 |       | hypothetical protein                                           | 1.07E+08 | 0        | 0        |         |   |                                                                 |         |                                    |
| PA5487 |       | hypothetical protein                                           | 56225235 | 70676291 | 1.257021 | COG3706 | T | Response regulator containing a CheY-like receiver domain an    | K02488  | CELLULAR PROCESSES AND SIGNALING   |
| PA5489 | dsbA  | thiol:disulfide interchange protein DsbA                       | 0        | 35978076 | 1000</   |         |   |                                                                 |         |                                    |

|        |      |                                      |          |          |          |         |   |                                                               |        |                                    |
|--------|------|--------------------------------------|----------|----------|----------|---------|---|---------------------------------------------------------------|--------|------------------------------------|
| PA5555 | atpG | ATP synthase gamma chain             | 57376199 | 74934264 | 1.306017 | COG0224 | C | "F0F1-type ATP synthase, gamma subunit"                       | K02115 | METABOLISM                         |
| PA5556 | atpA | ATP synthase alpha chain             | 9.36E+08 | 2.72E+09 | 2.904279 | COG0056 | C | "F0F1-type ATP synthase, alpha subunit"                       | K02111 | METABOLISM                         |
| PA5557 | atpH | ATP synthase delta chain             | 5.95E+09 | 4.14E+09 | 0.696811 | COG0712 | C | "F0F1-type ATP synthase, delta subunit (mitochondrial oligom" | K02113 | METABOLISM                         |
| PA5558 | atpF | ATP synthase B chain                 | 2.84E+10 | 2.24E+10 | 0.786812 | COG0711 | C | "F0F1-type ATP synthase, subunit b"                           | K02109 | METABOLISM                         |
| PA5562 | spoJ | chromosome partitioning protein SpoJ | 2.13E+08 | 98362748 | 0.462161 | COG1475 | K | Predicted transcriptional regulators                          | K03497 | INFORMATION STORAGE AND PROCESSING |
| PA5568 |      | conserved hypothetical protein       | 46712407 | 85006788 | 1.81979  | COG0706 | U | Preprotein translocase subunit YidC                           | K03217 | CELLULAR PROCESSES AND SIGNALING   |
| PA5570 | rpmH | 50S ribosomal protein L34            | 3.22E+09 | 2.96E+09 | 0.920184 | COG0230 | J | Ribosomal protein L34                                         | K02914 | INFORMATION STORAGE AND PROCESSING |

Table S3. Differentially regulated proteins of biofilm cells grown with control (CB) and antibiotic-coated (AB) catheters

| Locus Tag | Gene Name | Product Name                                                                                | N_C.B        | N_A.B        | Fold Ratio  | COG ID  | CODE | COG Function                                                                       | KOID   | Functional Category                |
|-----------|-----------|---------------------------------------------------------------------------------------------|--------------|--------------|-------------|---------|------|------------------------------------------------------------------------------------|--------|------------------------------------|
| P00015    | hypB      | hypothetical protein                                                                        | 70855633.9   | 65494903.27  | 0.92460389  | COG3529 | U    | Tip pilus assembly protein PilF                                                    | K04555 | CELLULAR PROCESSES AND SIGNALING   |
| P00015    | hypB      | hypothetical protein                                                                        | 70855633.9   | 65494903.27  | 0.92460389  | COG3063 | N    | Tip pilus assembly protein PilF                                                    | K02656 | CELLULAR PROCESSES AND SIGNALING   |
| P00399    |           | hypothetical protein                                                                        | 419117259.3  | 981040359.6  | 2.340730041 | 0       |      |                                                                                    |        |                                    |
| P00404    | exoT      | exoenzyme T                                                                                 | 0            | 58208225.1   | 1000        |         |      |                                                                                    |        |                                    |
| P00608    |           | hypothetical protein                                                                        | 1727040011.9 | 124516690.4  | 0.980120641 | COG3529 | U    | Predicted nucleic-acid-binding protein containing a Zn-ribon domain                | K07070 | POORLY CHARACTERIZED               |
| P00700    | tagQ1     | TagQ1                                                                                       | 12500438.4   | 86603817.63  | 0.692803725 | 0       |      |                                                                                    |        |                                    |
| P00803    | tsbB1     | TsbB1                                                                                       | 16375939.94  | 0            | 0           | COG3516 | S    | Uncharacterized protein conserved in bacteria                                      | K11901 | POORLY CHARACTERIZED               |
| P01003    |           | probable sulfate transporter                                                                | 526721845    | 635674266.7  | 1.206850015 | COG0659 | P    | Sulfate permease and related transporters (MFS superfamily)                        | K03321 | METABOLISM                         |
| P01218    |           | conserved hypothetical protein                                                              | 527077309.96 | 1000         | COG2824     | P       |      | Uncharacterized Zn-ribon-containing protein involved in phosphate metabolism       | K00193 | METABOLISM                         |
| P01319    | ahpC      | alkyl hydroperoxide reductase subunit C                                                     | 3388614287   | 6743261155   | 1.990236085 | COG0450 | O    | Peroxiredoxin                                                                      | K03386 | CELLULAR PROCESSES AND SIGNALING   |
| P01411    |           | conserved hypothetical protein                                                              | 1227474395   | 1635507451   | 1.332416756 |         |      |                                                                                    |        |                                    |
| P01411    |           | conserved hypothetical protein                                                              | 468973779.1  | 682089762.1  | 1.454430487 |         |      |                                                                                    |        |                                    |
| P01556    | trIA      | "Resistance-Modulation-Cell Division (RND) tricosan efflux membrane fusion protein          | 2172112176.3 | 211386650.3  | 0.973505459 | COG0845 | M    | Membrane-fusion protein                                                            | K02005 | CELLULAR PROCESSES AND SIGNALING   |
| P01556    | trIA      | "Resistance-Modulation-Cell Division (RND) tricosan efflux membrane fusion protein          | 2172112176.3 | 211386650.3  | 0.973505459 | COG0845 | M    | Membrane-fusion protein                                                            | K01993 | CELLULAR PROCESSES AND SIGNALING   |
| P01556    | trIA      | "Resistance-Modulation-Cell Division (RND) tricosan efflux membrane fusion protein          | 2172112176.3 | 211386650.3  | 0.973505459 | COG0845 | M    | Membrane-fusion protein                                                            | K02022 | CELLULAR PROCESSES AND SIGNALING   |
| P01556    | trIA      | "Resistance-Modulation-Cell Division (RND) tricosan efflux membrane fusion protein          | 2172112176.3 | 211386650.3  | 0.973505459 | COG0845 | M    | Membrane-fusion protein                                                            | K03585 | CELLULAR PROCESSES AND SIGNALING   |
| P01619    | siaD      | SiaD                                                                                        | 1812886732   | 2168054978   | 1.195913093 | COG3706 | T    | Response regulator containing a CheY-like receiver domain and a GGDEF domain       | K02488 | CELLULAR PROCESSES AND SIGNALING   |
| P01800    | cttP      | "chemotactic transducer for trichloroethylene [positive chemotaxis]                         | 410781354.9  | 89951154.1   | 2.188905217 | COG0840 | T    | Methyl-accepting chemotaxis protein                                                | K04306 | CELLULAR PROCESSES AND SIGNALING   |
| P01800    | cttP      | "chemotactic transducer for trichloroethylene [positive chemotaxis]                         | 410781354.9  | 89951154.1   | 2.188905217 | COG0840 | T    | Methyl-accepting chemotaxis protein                                                | K04306 | CELLULAR PROCESSES AND SIGNALING   |
| P03000    | spuD      | polyamine transport protein                                                                 | 72269979.17  | 0            | 0           | COG0687 | E    | Spermidine/putrescine-binding periplasmic protein                                  | K11069 | METABOLISM                         |
| P03000    | spuD      | polyamine transport protein                                                                 | 72269979.17  | 0            | 0           | COG0687 | E    | Spermidine/putrescine-binding periplasmic protein                                  | K02055 | METABOLISM                         |
| P03000    | spuD      | polyamine transport protein                                                                 | 72269979.17  | 0            | 0           | COG0687 | E    | Spermidine/putrescine-binding periplasmic protein                                  | K11073 | METABOLISM                         |
| P03000    | spuD      | polyamine transport protein                                                                 | 72269979.17  | 0            | 0           | COG0687 | E    | Spermidine/putrescine-binding periplasmic protein                                  | K11069 | METABOLISM                         |
| P03001    | spuE      | polyamine transport protein                                                                 | 157780541.4  | 0            | 0           | COG0687 | E    | Spermidine/putrescine-binding periplasmic protein                                  | K02055 | METABOLISM                         |
| P03001    | spuE      | polyamine transport protein                                                                 | 157780541.4  | 0            | 0           | COG0687 | E    | Spermidine/putrescine-binding periplasmic protein                                  | K11073 | METABOLISM                         |
| P03001    | spuE      | polyamine transport protein                                                                 | 157780541.4  | 0            | 0           | COG0687 | E    | Spermidine/putrescine-binding periplasmic protein                                  | K11073 | METABOLISM                         |
| P03009    |           | hypothetical protein                                                                        | 290627400.9  | 496178620.38 | 1.017026574 |         |      |                                                                                    |        |                                    |
| P03014    |           | L-cysteine transporter of ABC system FliY                                                   | 509111538.1  | 20652313.64  | 4.06E-02    | COG0834 | T    | "ABC-type amino acid transport/signal transduction systems, periplasmic component" | K02030 | CELLULAR PROCESSES AND SIGNALING   |
| P03014    |           | L-cysteine transporter of ABC system FliY                                                   | 509111538.1  | 20652313.64  | 4.06E-02    | COG0834 | T    | "ABC-type amino acid transport/signal transduction systems, periplasmic component" | K02030 | METABOLISM                         |
| P03015    | hypB      | hypothetical protein                                                                        | 459817041.1  | 60566385.1   | 1.32589061  |         |      |                                                                                    |        |                                    |
| P03018    |           | conserved hypothetical protein                                                              | 27481655.78  | 0            | 0           | COG0179 | Q    | "2-keto-6-pentenoate hydratase/2-oxohepta-3-ene-1,7-dioic acid hydratase (cate)"   | K05921 | METABOLISM                         |
| P03018    |           | conserved hypothetical protein                                                              | 27481655.78  | 0            | 0           | COG0179 | Q    | "2-keto-6-pentenoate hydratase/2-oxohepta-3-ene-1,7-dioic acid hydratase (cate)"   | K01555 | METABOLISM                         |
| P03219    |           | conserved hypothetical protein                                                              | 363111582.1  | 3738456426   | 1.029555657 | COG3422 | S    | Uncharacterized conserved protein                                                  | K09946 | POORLY CHARACTERIZED               |
| P03300    | piA       | ribose 5-phosphate isomerase                                                                | 73732502.43  | 0            | 0           | COG0120 | G    | Ribose 5-phosphate isomerase                                                       | K01807 | METABOLISM                         |
| P03355    | pfpi      | protease Pfpi                                                                               | 14094120.16  | 0            | 0           | COG0693 | R    | Putative intracellular protease/amidase                                            | K05520 | POORLY CHARACTERIZED               |
| P03355    | pfpi      | protease Pfpi                                                                               | 14094120.16  | 0            | 0           | COG0693 | R    | Putative intracellular protease/amidase                                            | K03152 | POORLY CHARACTERIZED               |
| P03359    |           | hypothetical protein                                                                        | 62998650.72  | 0            | 0           |         |      |                                                                                    |        |                                    |
| P03711    | hypB      | hypothetical protein                                                                        | 267696234.9  | 68238141.28  | 0.254908857 | COG0612 | R    | Predicted Zn-dependent peptidases                                                  | K07263 | POORLY CHARACTERIZED               |
| P03711    | hypB      | hypothetical protein                                                                        | 267696234.9  | 68238141.28  | 0.254908857 | COG0612 | R    | Predicted Zn-dependent peptidases                                                  | K01422 | POORLY CHARACTERIZED               |
| P03711    | hypB      | hypothetical protein                                                                        | 267696234.9  | 68238141.28  | 0.254908857 | COG0612 | R    | Predicted Zn-dependent peptidases                                                  | K01412 | POORLY CHARACTERIZED               |
| P03711    | hypB      | hypothetical protein                                                                        | 267696234.9  | 68238141.28  | 0.254908857 | COG0612 | R    | Predicted Zn-dependent peptidases                                                  | K01423 | POORLY CHARACTERIZED               |
| P03712    |           | probable zinc protease                                                                      | 44101805     | 0            | 0           | COG0612 | R    | Predicted Zn-dependent peptidases                                                  | K01422 | POORLY CHARACTERIZED               |
| P03712    |           | probable zinc protease                                                                      | 44101805     | 0            | 0           | COG0612 | R    | Predicted Zn-dependent peptidases                                                  | K01412 | POORLY CHARACTERIZED               |
| P03712    |           | probable zinc protease                                                                      | 44101805     | 0            | 0           | COG0612 | R    | Predicted Zn-dependent peptidases                                                  | K01423 | POORLY CHARACTERIZED               |
| P03712    |           | probable zinc protease                                                                      | 44101805     | 0            | 0           | COG0612 | R    | Predicted Zn-dependent peptidases                                                  | K07263 | POORLY CHARACTERIZED               |
| P03773    | ftsY      | signal recognition particle receptor FtsY                                                   | 178477704.08 | 0            | 0           | COG0552 | U    | Signal recognition particle GTPase                                                 | K03110 | CELLULAR PROCESSES AND SIGNALING   |
| P03775    | ftsX      | cell division protein FtsX                                                                  | 294609463.27 | 0            | 0           | COG2177 | D    | Cell division protein                                                              | K08611 | CELLULAR PROCESSES AND SIGNALING   |
| P03887    |           | conserved hypothetical protein                                                              | 153184966.8  | 0            | 0           | COG0127 | F    | Xanthine triphosphatase pyrophosphatase                                            | K01516 | METABOLISM                         |
| P03888    |           | hypothetical protein                                                                        | 241382685.1  | 0            | 0           |         |      |                                                                                    |        |                                    |
| P03904    |           | conserved hypothetical protein                                                              | 13907206.13  | 39139431.44  | 2.814327412 | COG0325 | R    | Predicted enzyme with a TIM-barrel fold                                            | K06697 | POORLY CHARACTERIZED               |
| P03999    |           | cystathionine beta-synthase                                                                 | 0            | 14040161.44  | 1000        | COG0617 | F    | FOG: CBS domain                                                                    | K00941 | POORLY CHARACTERIZED               |
| P03999    |           | cystathionine beta-synthase                                                                 | 0            | 14040161.44  | 1000        | COG0031 | E    | Cysteine synthase                                                                  | K01691 | METABOLISM                         |
| P03999    |           | cystathionine beta-synthase                                                                 | 0            | 14040161.44  | 1000        | COG0031 | E    | Cysteine synthase                                                                  | K12339 | METABOLISM                         |
| P03999    |           | cystathionine beta-synthase                                                                 | 0            | 14040161.44  | 1000        | COG0517 | R    | FOG: CBS domain                                                                    | K00088 | POORLY CHARACTERIZED               |
| P03999    |           | cystathionine beta-synthase                                                                 | 0            | 14040161.44  | 1000        | COG0031 | E    | Cysteine synthase                                                                  | K01738 | METABOLISM                         |
| P04003    | pyrB      | transcriptional regulator PyrB                                                              | 67339634.9   | 12021404.03  | 0.773671043 | COG0745 | K    | Pyrimidine operon attenuation protein/uracil phosphoribosyltransferase             | K01823 | METABOLISM                         |
| P04008    | piIG      | twitching motility protein PiIG                                                             | 345996731.1  | 267481962.5  | 0.773076558 | COG0745 | T    | Response regulators consisting of a CheY-like receiver domain and a winged-he      | K02483 | INFORMATION STORAGE AND PROCESSING |
| P04008    | piIG      | twitching motility protein PiIG                                                             | 345996731.1  | 267481962.5  | 0.773076558 | COG0745 | T    | Response regulators consisting of a CheY-like receiver domain and a winged-he      | K02483 | CELLULAR PROCESSES AND SIGNALING   |
| P04008    | piIH      | twitching motility protein PiIH                                                             | 2574139142   | 1687949120   | 0.655733442 | COG0745 | T    | Response regulators consisting of a CheY-like receiver domain and a winged-he      | K02483 | CELLULAR PROCESSES AND SIGNALING   |
| P04009    | piIH      | twitching motility protein PiIH                                                             | 2574139142   | 1687949120   | 0.655733442 | COG0745 | T    | Response regulators consisting of a CheY-like receiver domain and a winged-he      | K02483 | INFORMATION STORAGE AND PROCESSING |
| P04111    | piII      | twitching motility protein PiII                                                             | 3104945942   | 2856565042   | 0.920032424 | COG0840 | T    | Methyl-accepting chemotaxis protein                                                | K04306 | CELLULAR PROCESSES AND SIGNALING   |
| P04111    | piII      | twitching motility protein PiII                                                             | 3104945942   | 2856565042   | 0.920032424 | COG0840 | T    | Methyl-accepting chemotaxis protein                                                | K04306 | CELLULAR PROCESSES AND SIGNALING   |
| P04113    | chpA      | component of chemotactic signal transduction system                                         | 35193588.43  | 9563944.391  | 0.271752465 | COG2198 | T    | FOG: HPI domain                                                                    | K07676 | CELLULAR PROCESSES AND SIGNALING   |
| P04113    | chpA      | component of chemotactic signal transduction system                                         | 35193588.43  | 9563944.391  | 0.271752465 | COG0643 | T    | Chemotaxis protein histidine kinase and related kinases                            | K03407 | CELLULAR PROCESSES AND SIGNALING   |
| P04113    | chpA      | component of chemotactic signal transduction system                                         | 35193588.43  | 9563944.391  | 0.271752465 | COG0784 | T    | FOG: CheY-like receiver                                                            | K03413 | CELLULAR PROCESSES AND SIGNALING   |
| P04113    | chpA      | component of chemotactic signal transduction system                                         | 35193588.43  | 9563944.391  | 0.271752465 | COG0643 | T    | Chemotaxis protein histidine kinase and related kinases                            | K02487 | CELLULAR PROCESSES AND SIGNALING   |
| P04113    | chpA      | component of chemotactic signal transduction system                                         | 35193588.43  | 9563944.391  | 0.271752465 | COG0643 | T    | Chemotaxis protein histidine kinase and related kinases                            | K05956 | CELLULAR PROCESSES AND SIGNALING   |
| P04113    | chpA      | component of chemotactic signal transduction system                                         | 35193588.43  | 9563944.391  | 0.271752465 | COG0643 | T    | Chemotaxis protein histidine kinase and related kinases                            | K02487 | CELLULAR PROCESSES AND SIGNALING   |
| P04113    | chpA      | component of chemotactic signal transduction system                                         | 35193588.43  | 9563944.391  | 0.271752465 | COG0643 | T    | Chemotaxis protein histidine kinase and related kinases                            | K03407 | CELLULAR PROCESSES AND SIGNALING   |
| P04113    | chpA      | component of chemotactic signal transduction system                                         | 35193588.43  | 9563944.391  | 0.271752465 | COG2198 | T    | FOG: HPI domain                                                                    | K07679 | CELLULAR PROCESSES AND SIGNALING   |
| P04113    | chpA      | component of chemotactic signal transduction system                                         | 35193588.43  | 9563944.391  | 0.271752465 | COG2198 | T    | FOG: HPI domain                                                                    | K07647 | CELLULAR PROCESSES AND SIGNALING   |
| P04113    | chpA      | component of chemotactic signal transduction system                                         | 35193588.43  | 9563944.391  | 0.271752465 | COG0643 | N    | Chemotaxis protein histidine kinase and related kinases                            | K07648 | CELLULAR PROCESSES AND SIGNALING   |
| P04213    | pasP      | pasP                                                                                        | 474966972    | 5457089223   | 1.15746005  |         |      |                                                                                    | K05956 | CELLULAR PROCESSES AND SIGNALING   |
| P04277    | oprM      | Major intrinsic multiple antibiotic resistance efflux outer membrane protein OprM precursor | 0            | 11134937.75  | 1000        | COG1538 | M    | Outer membrane protein                                                             | K03287 | CELLULAR PROCESSES AND SIGNALING   |
| P04277    | oprM      | Major intrinsic multiple antibiotic resistance efflux outer membrane protein OprM precursor | 0            | 11134937.75  | 1000        | COG1538 | M    | Outer membrane protein                                                             | K12340 | CELLULAR PROCESSES AND SIGNALING   |
| P04277    | oprM      | Major intrinsic multiple antibiotic resistance efflux outer membrane protein OprM precursor | 0            | 11134937.75  | 1000        | COG1538 | M    | Outer membrane protein                                                             | K12340 | CELLULAR PROCESSES AND SIGNALING   |
| P04277    | oprM      | Major intrinsic multiple antibiotic resistance efflux outer membrane protein OprM precursor | 0            | 11134937.75  | 1000        | COG1538 | M    | Outer membrane protein                                                             | K03287 | CELLULAR PROCESSES AND SIGNALING   |
| P04277    | oprM      | Major intrinsic multiple antibiotic resistance efflux outer membrane protein OprM precursor | 0            | 11134937.75  | 1000        | COG1538 | M    | Outer membrane protein                                                             | K12340 | CELLULAR PROCESSES AND SIGNALING   |
| P04277    | oprM      | Major intrinsic multiple antibiotic resistance efflux outer membrane protein OprM precursor | 0            | 11134937.75  | 1000        | COG1538 | M    | Outer membrane protein                                                             | K03287 | CELLULAR PROCESSES AND SIGNALING   |
| P04277    | oprM      | Major intrinsic multiple antibiotic resistance efflux outer membrane protein OprM precursor | 0            | 11134937.75  | 1000        | COG1538 | M    | Outer membrane protein                                                             | K12340 | CELLULAR PROCESSES AND SIGNALING   |
| P04277    | oprM      | Major intrinsic multiple antibiotic resistance efflux outer membrane protein OprM precursor | 0            | 11134937.75  | 1000        | COG1538 | M    | Outer membrane protein                                                             | K03287 | CELLULAR PROCESSES AND SIGNALING   |
| P04277    | oprM      | Major intrinsic multiple antibiotic resistance efflux outer membrane protein OprM precursor | 0            | 11134937.75  | 1000        | COG1538 | M    | Outer membrane protein                                                             | K12340 | CELLULAR PROCESSES AND SIGNALING   |
| P04277    | oprM      | Major intrinsic multiple antibiotic resistance efflux outer membrane protein OprM precursor | 0            | 11134937.75  | 1000        | COG1538 | M    | Outer membrane protein                                                             | K03287 | CELLULAR PROCESSES AND SIGNALING   |
| P04277    | oprM      | Major intrinsic multiple antibiotic resistance efflux outer membrane protein OprM precursor | 0            | 11134937.75  | 1000        | COG1538 | M    | Outer membrane protein                                                             | K12340 | CELLULAR PROCESSES AND SIGNALING   |
| P04277    | oprM      | Major intrinsic multiple antibiotic resistance efflux outer membrane protein OprM precursor | 0            | 11134937.75  | 1000        | COG1538 | M    | Outer membrane protein                                                             | K03287 | CELLULAR PROCESSES AND SIGNALING   |
| P04277    | oprM      | Major intrinsic multiple antibiotic resistance efflux outer membrane protein OprM precursor | 0            | 11134937.75  | 1000        | COG1538 | M    | Outer membrane protein                                                             | K12340 | CELLULAR PROCESSES AND SIGNALING   |
| P04277    | oprM      | Major intrinsic multiple antibiotic resistance efflux outer membrane protein OprM precursor | 0            | 11134937.75  | 1000        | COG1538 | M    | Outer membrane protein                                                             | K03287 | CELLULAR PROCESSES AND SIGNALING   |
| P04277    | oprM      | Major intrinsic multiple antibiotic resistance efflux outer membrane protein OprM precursor | 0            | 11134937.75  | 1000        | COG1538 | M    | Outer membrane protein                                                             | K12340 | CELLULAR PROCESSES AND SIGNALING   |
| P04277    | oprM      | Major intrinsic multiple antibiotic resistance efflux outer membrane protein OprM precursor | 0            | 11134937.75  | 1000        | COG1538 | M    | Outer membrane protein                                                             | K03287 | CELLULAR PROCESSES AND SIGNALING   |
| P04277    | oprM      | Major intrinsic multiple antibiotic resistance efflux outer membrane protein OprM precursor | 0            | 11134937.75  | 1000        | COG1538 | M    | Outer membrane protein                                                             | K12340 | CELLULAR PROCESSES AND SIGNALING   |
| P04277    | oprM      | Major intrinsic multiple antibiotic resistance efflux outer membrane protein OprM precursor | 0            | 11134937.75  | 1000        | COG1538 | M    | Outer membrane protein                                                             | K03287 | CELLULAR PROCESSES AND SIGNALING   |
| P04277    | oprM      | Major intrinsic multiple antibiotic resistance efflux outer membrane protein OprM precursor | 0            | 11134937.75  | 1000        | COG1538 | M    | Outer membrane protein                                                             | K12340 | CELLULAR PROCESSES AND SIGNALING   |
| P04277    | oprM      | Major intrinsic multiple antibiotic resistance efflux outer membrane protein OprM precursor | 0            | 11134937.75  | 1000        | COG1538 | M    | Outer membrane protein                                                             | K03287 | CELLULAR PROCESSES AND SIGNALING   |
| P04277    | oprM      | Major intrinsic multiple antibiotic resistance efflux outer membrane protein OprM precursor | 0            | 11134937.75  | 1000        | COG1538 | M    | Outer membrane protein                                                             | K12340 | CELLULAR PROCESSES AND SIGNALING   |
| P04277    | oprM      | Major intrinsic multiple antibiotic resistance efflux outer membrane protein OprM precursor | 0            | 11134937.75  | 1000        | COG1538 | M    | Outer membrane protein                                                             | K03287 | CELLULAR PROCESSES AND SIGNALING   |
| P04277    | oprM      | Major intrinsic multiple antibiotic resistance efflux outer membrane protein OprM precursor | 0            | 11134937.75  | 1000        | COG1538 | M    | Outer membrane protein                                                             | K12340 | CELLULAR PROCESSES AND SIGNALING   |
| P04277    | oprM      | Major intrinsic multiple antibiotic resistance efflux outer membrane protein OprM precursor | 0            | 11134937.75  | 1000        | COG1538 | M    | Outer membrane protein                                                             | K03287 | CELLULAR PROCESSES AND SIGNALING   |
| P04277    | oprM      | Major intrinsic multiple antibiotic resistance efflux outer membrane protein OprM precursor | 0            | 11134937.75  | 1000        | COG1538 | M    | Outer membrane protein                                                             | K12340 | CELLULAR PROCESSES AND SIGNALING   |
| P04277    | oprM      | Major intrinsic multiple antibiotic resistance efflux outer membrane protein OprM precursor | 0            | 11134937.75  | 1000        | COG1538 | M    | Outer membrane protein                                                             | K03287 | CELLULAR PROCESSES AND SIGNALING   |
| P04277    | oprM      | Major intrinsic multiple antibiotic resistance efflux outer membrane protein OprM precursor | 0            | 11134937.75  | 1000        | COG1538 | M    | Outer membrane protein                                                             | K12340 | CELLULAR PROCESSES AND SIGNALING   |
| P04277    | oprM      | Major intrinsic multiple antibiotic resistance efflux outer membrane protein OprM precursor | 0            | 11134937.75  | 1000        | COG1538 | M    | Outer membrane protein                                                             | K03287 | CELLULAR PROCESSES AND SIGNALING   |
| P04277    | oprM      | Major intrinsic multiple antibiotic resistance efflux outer membrane protein OprM precursor | 0            | 11134937.75  | 1000        | COG1538 | M    | Outer membrane protein                                                             | K12340 | CELLULAR PROCESSES AND SIGNALING   |
| P04277    | oprM      | Major intrinsic multiple antibiotic resistance efflux outer membrane protein OprM precursor | 0            | 11134937.75  |             |         |      |                                                                                    |        |                                    |

|        |      |                                                         |               |             |              |         |   |                                                                                    |        |                                    |
|--------|------|---------------------------------------------------------|---------------|-------------|--------------|---------|---|------------------------------------------------------------------------------------|--------|------------------------------------|
| PA0871 | phhB | pterin-4-alpha-carbinolamine dehydratase                | 257686045.3   | 0           | 0            | COG2154 | H | Pterin-4α-carbinolamine dehydratase                                                | K01724 | METABOLISM                         |
| PA0888 | actJ | arginine/ornithine binding protein ActJ                 | 838527228.2   | 153987757   | 0.183640736  | COG0834 | T | "ABC-type amino acid transport/signal transduction systems, periplasmic component" | K02030 | CELLULAR PROCESSES AND SIGNALING   |
| PA0888 | actJ | arginine/ornithine binding protein ActJ                 | 838527228.2   | 153987757   | 0.183640736  | COG0834 | T | "ABC-type amino acid transport/signal transduction systems, periplasmic component" | K02030 | METABOLISM                         |
| PA0900 |      | hypothetical protein                                    | 18364879.36   | 0           | 0            |         |   |                                                                                    |        |                                    |
| PA0905 | rsmA | RsmA                                                    | 4748669931    | 3375936489  | 0.17002254   | COG1551 | T | Carbon storage regulator (could also regulate swarming and quorum sensing)         | K03563 | CELLULAR PROCESSES AND SIGNALING   |
| PA0913 | mgIE | MgIE                                                    | 157916301.0   | 0           | 0            | COG2239 | P | Mg/Cu/Hg transporter MgIE (contains CBS domain)                                    | K06213 | METABOLISM                         |
| PA0919 |      | aspartyl-phosphatidylglycerol hydrolase                 | 22770551.38   | 0           | 0            |         |   |                                                                                    |        |                                    |
| PA0937 |      | conserved hypothetical protein                          | 3665436124    | 233975210.0 | 0.836328447  | COG3122 | S | Uncharacterized protein conserved in bacteria                                      | K09912 | POORLY CHARACTERIZED               |
| PA0938 | wzz2 | Wzz2                                                    | 199594122.6   | 0           | 0            | COG3765 | M | Chain length determinant protein                                                   | K05789 | CELLULAR PROCESSES AND SIGNALING   |
| PA0938 | wzz2 | Wzz2                                                    | 199594122.6   | 0           | 0            | COG3765 | M | Chain length determinant protein                                                   | K05789 | CELLULAR PROCESSES AND SIGNALING   |
| PA0945 | purM | phosphoribosylaminimidazole synthetase                  | 56484724.4    | 254972531.7 | 0.451400645  | COG0150 | F | Phosphoribosylaminimidazole (AIR) synthetase                                       | K03933 | METABOLISM                         |
| PA0946 |      | hypothetical protein                                    | 949045761.9   | 86401961.7  | 0.04040571   | COG3249 | S | Uncharacterized protein conserved in bacteria                                      | K09398 | POORLY CHARACTERIZED               |
| PA0950 |      | probable arsenate reductase                             | 2104155822    | 877472797.1 | 0.4517018924 | COG1393 | P | "Arsenate reductase and related proteins, glutaredoxin family"                     | K05037 | METABOLISM                         |
| PA0953 |      | probable thioredoxin                                    | 143178022     | 0           | 0            | COG0526 | O | Thiol-disulfide isomerase and thioredoxins                                         | K03671 | CELLULAR PROCESSES AND SIGNALING   |
| PA0953 |      | probable thioredoxin                                    | 143178022     | 0           | 0            | COG0526 | O | Thiol-disulfide isomerase and thioredoxins                                         | K03673 | CELLULAR PROCESSES AND SIGNALING   |
| PA0953 |      | probable thioredoxin                                    | 143178022     | 0           | 0            | COG0526 | C | Thiol-disulfide isomerase and thioredoxins                                         | K03673 | CELLULAR PROCESSES AND SIGNALING   |
| PA0953 |      | probable thioredoxin                                    | 143178022     | 0           | 0            | COG0526 | C | Thiol-disulfide isomerase and thioredoxins                                         | K03671 | METABOLISM                         |
| PA0960 |      | hypothetical protein                                    | 163460541.9   | 0           | 0            | COG2900 | S | Uncharacterized protein conserved in bacteria                                      | K03745 | POORLY CHARACTERIZED               |
| PA0962 | dps  | "DNA-binding protein from starved cells                 | 196782743.6   | 706372140.1 | 3.589520088  | COG0783 | P | DNA-binding ferritin-like protein (oxidative damage protectant)                    | K04047 | METABOLISM                         |
| PA0963 | aspS | aspartyl-tRNA synthetase                                | 8487442.272   | 43895250.7  | 5.171787835  | COG0173 | J | Aspartyl-tRNA synthetase                                                           | K01876 | INFORMATION STORAGE AND PROCESSING |
| PA0964 | pmrH | "pepM-mediated PG2 regulator                            | 274848138.3   | 148020009.4 | 0.513152064  |         |   |                                                                                    |        |                                    |
| PA0969 | tolQ | TolQ protein                                            | 23621685.4    | 26418391.88 | 0.164876203  | COG0811 | T | Biopolymer transport proteins                                                      | K03561 | CELLULAR PROCESSES AND SIGNALING   |
| PA0969 | tolQ | TolQ protein                                            | 23621685.4    | 26418391.88 | 0.164876203  | COG0811 | T | Biopolymer transport proteins                                                      | K03562 | CELLULAR PROCESSES AND SIGNALING   |
| PA0970 | tolR | TolR protein                                            | 1018430398    | 690888051.6 | 0.678385143  | COG0848 | U | Biopolymer transport protein                                                       | K03559 | CELLULAR PROCESSES AND SIGNALING   |
| PA0970 | tolR | TolR protein                                            | 1018430398    | 690888051.6 | 0.678385143  | COG0848 | U | Biopolymer transport protein                                                       | K03560 | CELLULAR PROCESSES AND SIGNALING   |
| PA0973 | oprL | Peptidoglycan associated lipoprotein OprL precursor     | 2927469153.2  | 25172102074 | 0.889278262  | COG2885 | M | Outer membrane protein and related peptidoglycan-associated [lipol]proteins        | K03286 | CELLULAR PROCESSES AND SIGNALING   |
| PA0973 | oprL | Peptidoglycan associated lipoprotein OprL precursor     | 2892469353.2  | 25172102074 | 0.889278262  | COG2885 | M | Outer membrane protein and related peptidoglycan-associated [lipol]proteins        | K03640 | CELLULAR PROCESSES AND SIGNALING   |
| PA0974 |      | conserved hypothetical protein                          | 942759676.5   | 669209605.5 | 0.709884142  |         |   |                                                                                    |        |                                    |
| PA1006 |      | Protein PA1006                                          | 180401749.5   | 0           | 0            | COG0425 | O | "Predicted redox protein, regulator of disulfide bond formation"                   | K04085 | CELLULAR PROCESSES AND SIGNALING   |
| PA1008 | bcp  | bacterio-identin comigratory protein                    | 394289387.5   | 14222873.5  | 0.411444707  | COG1275 | T | Cellulose biosynthesis                                                             | K03564 | CELLULAR PROCESSES AND SIGNALING   |
| PA1010 | dapA | dihydrodipicolinate synthase                            | 1985790317    | 1542239463  | 0.776637618  | COG0329 | M | Dihydrodipicolinate synthase/N-acetylneuraminate lyase                             | K01639 | CELLULAR PROCESSES AND SIGNALING   |
| PA1010 | dapA | dihydrodipicolinate synthase                            | 1985790317    | 1542239463  | 0.776637618  | COG0329 | E | Dihydrodipicolinate synthase/N-acetylneuraminate lyase                             | K01714 | METABOLISM                         |
| PA1010 | dapA | dihydrodipicolinate synthase                            | 1985790317    | 1542239463  | 0.776637618  | COG0329 | M | Dihydrodipicolinate synthase/N-acetylneuraminate lyase                             | K01714 | CELLULAR PROCESSES AND SIGNALING   |
| PA1010 | dapA | dihydrodipicolinate synthase                            | 1985790317    | 1542239463  | 0.776637618  | COG0329 | E | Dihydrodipicolinate synthase/N-acetylneuraminate lyase                             | K01639 | METABOLISM                         |
| PA1011 |      | hypothetical protein                                    | 1028121829    | 1127959594  | 1.07016111   | COG3317 | M | Uncharacterized lipoprotein                                                        | K07287 | CELLULAR PROCESSES AND SIGNALING   |
| PA1013 | purC | phosphoribosylaminimidazole-succinocarboxamide synthase | 119648884.8   | 0           | 0            | COG0152 | F | Phosphoribosylaminimidazole-succinocarboxamide (SAICAR) synthase                   | K01923 | METABOLISM                         |
| PA1041 |      | probable outer membrane protein precursor               | 807330146.7   | 773226310.1 | 0.957757024  | COG2885 | M | Outer membrane protein and related peptidoglycan-associated [lipol]proteins        | K03640 | CELLULAR PROCESSES AND SIGNALING   |
| PA1041 |      | probable outer membrane protein precursor               | 807330146.7   | 773226310.1 | 0.957757024  | COG2885 | M | Outer membrane protein and related peptidoglycan-associated [lipol]proteins        | K03286 | CELLULAR PROCESSES AND SIGNALING   |
| PA1049 | pdxH | pyridoxase S' phosphate oxidase                         | 0             | 19740164.05 | 0            | COG2559 | H | Pyridoxamine-phosphate oxidase                                                     | K01075 | METABOLISM                         |
| PA1053 |      | conserved hypothetical protein                          | 818598384.8   | 574546187.5 | 0.701865772  | COG3133 | N | Outer membrane lipoprotein                                                         | K06077 | CELLULAR PROCESSES AND SIGNALING   |
| PA1064 |      | hypothetical protein                                    | 379549549.7   | 20803304.7  | 0.548106314  | COG3650 | S | Predicted membrane protein                                                         | K08985 | POORLY CHARACTERIZED               |
| PA1074 | brAC | branched-chain amino acid transport protein BrAC        | 592147645.6   | 228153101.6 | 0.385297659  | COG0683 | E | "ABC-type branched-chain amino acid transport systems, periplasmic component"      | K01999 | METABOLISM                         |
| PA1076 |      | hypothetical protein                                    | 1914991822    | 1509936124  | 0.9197558102 |         |   |                                                                                    |        |                                    |
| PA1086 | flgK | flagellar hook-associated protein 1 FlgK                | 17998392.28   | 220316.196  | 0.400194601  | COG1256 | N | Flagellar hook-associated protein                                                  | K02396 | CELLULAR PROCESSES AND SIGNALING   |
| PA1087 | flgK | flagellar hook-associated protein type 3 FlgK           | 32846575.02   | 31276336.7  | 0.952194763  | COG1344 | N | Flagellin and related hook-associated proteins                                     | K02406 | CELLULAR PROCESSES AND SIGNALING   |
| PA1087 | flgK | flagellar hook-associated protein type 3 FlgK           | 32846575.02   | 31276336.7  | 0.952194763  | COG1344 | N | Flagellin and related hook-associated proteins                                     | K02397 | CELLULAR PROCESSES AND SIGNALING   |
| PA1092 | flc  | flagellin type B                                        | 29115082904   | 48659542166 | 1.675143132  | COG1344 | N | Flagellin and related hook-associated proteins                                     | K02397 | CELLULAR PROCESSES AND SIGNALING   |
| PA1092 | flc  | flagellin type B                                        | 29115082904   | 48659542166 | 1.675143132  | COG1344 | N | Flagellin and related hook-associated proteins                                     | K02406 | CELLULAR PROCESSES AND SIGNALING   |
| PA1094 | fliD | flagellar capping protein FliD                          | 207716472     | 153140153   | 0.7372557    | COG1345 | N | Flagellar capping protein                                                          | K02407 | CELLULAR PROCESSES AND SIGNALING   |
| PA1096 |      | hypothetical protein                                    | 18614809.63   | 24034410.18 | 1.29114456   |         |   |                                                                                    |        |                                    |
| PA1097 | flcQ | transcriptional regulator FlcQ                          | 222607004.7   | 162270637.5 | 0.728956667  | COG2204 | T | "Response regulator containing CheY-like receiver, AAA-type ATPase, and DNA-B"     | K07122 | CELLULAR PROCESSES AND SIGNALING   |
| PA1097 | flcQ | transcriptional regulator FlcQ                          | 222607004.7   | 162270637.5 | 0.728956667  | COG2204 | T | "Response regulator containing CheY-like receiver, AAA-type ATPase, and DNA-B"     | K01206 | CELLULAR PROCESSES AND SIGNALING   |
| PA1097 | flcQ | transcriptional regulator FlcQ                          | 222607004.7   | 162270637.5 | 0.728956667  | COG2204 | T | "Response regulator containing CheY-like receiver, AAA-type ATPase, and DNA-B"     | K02481 | CELLULAR PROCESSES AND SIGNALING   |
| PA1101 | flfF | Flagella M-ring outer membrane protein precursor        | 15891534.61   | 0           | 0            | COG1766 | N | Flagellar biosynthesis/type III secretory pathway lipoprotein                      | K02409 | CELLULAR PROCESSES AND SIGNALING   |
| PA1101 | flfF | Flagella M-ring outer membrane protein precursor        | 15891534.61   | 0           | 0            | COG1766 | N | Flagellar biosynthesis/type III secretory pathway lipoprotein                      | K02409 | CELLULAR PROCESSES AND SIGNALING   |
| PA1103 |      | probable flagellar assembly protein                     | 92415878.51   | 70885277.99 | 0.767024879  | COG1317 | U | Flagellar biosynthesis/type III secretory pathway protein                          | K02411 | CELLULAR PROCESSES AND SIGNALING   |
| PA1103 |      | probable flagellar assembly protein                     | 92415878.51   | 70885277.99 | 0.767024879  | COG1317 | U | Flagellar biosynthesis/type III secretory pathway protein                          | K02411 | CELLULAR PROCESSES AND SIGNALING   |
| PA1103 |      | probable flagellar assembly protein                     | 92415878.51   | 70885277.99 | 0.767024879  | COG1317 | U | Flagellar biosynthesis/type III secretory pathway protein                          | K02411 | CELLULAR PROCESSES AND SIGNALING   |
| PA1103 |      | probable flagellar assembly protein                     | 92415878.51   | 70885277.99 | 0.767024879  | COG1317 | U | Flagellar biosynthesis/type III secretory pathway protein                          | K02411 | CELLULAR PROCESSES AND SIGNALING   |
| PA1119 | yfIB | yfIB                                                    | 969314447.1   | 505641839.5 | 0.521648925  | COG2885 | M | Outer membrane protein and related peptidoglycan-associated [lipol]proteins        | K03640 | CELLULAR PROCESSES AND SIGNALING   |
| PA1119 | yfIB | yfIB                                                    | 969314447.1   | 505641839.5 | 0.521648925  | COG2885 | M | Outer membrane protein and related peptidoglycan-associated [lipol]proteins        | K03286 | CELLULAR PROCESSES AND SIGNALING   |
| PA1123 |      | hypothetical protein                                    | 324917030.7   | 0           | 0            |         |   |                                                                                    |        |                                    |
| PA1127 |      | probable oxidoreductase                                 | 84128047.44   | 0           | 0            |         |   |                                                                                    |        |                                    |
| PA1139 |      | hypothetical protein                                    | 182772916.64  | 0           | 0            |         |   |                                                                                    |        |                                    |
| PA1151 | imm2 | pyocin S2 immunity protein                              | 3338854030    | 2539104503  | 0.760471851  |         |   |                                                                                    |        |                                    |
| PA1155 | nrvB | "NrvB                                                   | 47282195.38   | 16000949.8  | 3.38404611   | COG0208 | F | "Ribonucleotide reductase, beta subunit"                                           | K01808 | METABOLISM                         |
| PA1155 | nrvB | "NrvB                                                   | 47282195.38   | 16000949.8  | 3.38404611   | COG0208 | F | "Ribonucleotide reductase, beta subunit"                                           | K02526 | METABOLISM                         |
| PA1156 | nrDA | "NrDA                                                   | 239516191.8   | 20095308.57 | 8.39E-02     | COG0209 | F | "Ribonucleotide reductase, alpha subunit"                                          | K00525 | METABOLISM                         |
| PA1159 |      | probable cold-shock protein                             | 15203315803   | 12910210918 | 0.844173434  | COG1278 | K | Cold shock protein                                                                 | K03704 | INFORMATION STORAGE AND PROCESSING |
| PA1203 |      | hypothetical protein                                    | 44189156.78   | 128736541.7 | 2.913306139  | COG1765 | O | "Predicted redox protein, regulator of disulfide bond formation"                   | K06889 | CELLULAR PROCESSES AND SIGNALING   |
| PA1203 |      | hypothetical protein                                    | 44189156.78   | 128736541.7 | 2.913306139  | COG1765 | O | "Predicted redox protein, regulator of disulfide bond formation"                   | K07397 | CELLULAR PROCESSES AND SIGNALING   |
| PA1244 | qslA | QslA                                                    | 748778951.9   | 59637092.02 | 7.83E-02     |         |   |                                                                                    |        |                                    |
| PA1272 | cobJ | cobJ[alamin adenosyltransferase                         | 1152275.7     | 20303595.94 | 1.738190051  | COG2109 | H | ATP-corrinoid adenosyltransferase                                                  | K00798 | METABOLISM                         |
| PA1295 |      | conserved hypothetical protein                          | 55172170.26   | 31850936.43 | 0.577300771  | COG3010 | S | Uncharacterized protein conserved in bacteria                                      | K09902 | POORLY CHARACTERIZED               |
| PA1323 |      | hypothetical protein                                    | 417437338.8   | 214890643.5 | 0.514785391  | COG4575 | S | Uncharacterized conserved protein                                                  | K05594 | POORLY CHARACTERIZED               |
| PA1324 |      | hypothetical protein                                    | 1087867808    | 239213916.6 | 0.129910834  |         |   |                                                                                    |        |                                    |
| PA1338 | ggt  | gamma-glutamyltranspeptidase precursor                  | 20221126.05   | 0           | 0            | COG0405 | E | Gamma-glutamyltransferase                                                          | K00681 | METABOLISM                         |
| PA1342 | aatJ | AatJ                                                    | 895641801.5   | 91800555.41 | 0.102469953  | COG0834 | T | "ABC-type amino acid transport/signal transduction systems, periplasmic component" | K02030 | CELLULAR PROCESSES AND SIGNALING   |
| PA1342 | aatJ | AatJ                                                    | 895641801.5   | 91800555.41 | 0.102469953  | COG0834 | T | "ABC-type amino acid transport/signal transduction systems, periplasmic component" | K02030 | METABOLISM                         |
| PA1369 |      | hypothetical protein                                    | 2060397276    | 25944272899 | 1.24114888   |         |   |                                                                                    |        |                                    |
| PA1423 | bdIA | bdIA                                                    | 410781354.9   | 899531154.1 | 2.189805217  | COG0840 | N | Methyl-accepting chemotaxis protein                                                | K03406 | CELLULAR PROCESSES AND SIGNALING   |
| PA1423 | bdIA | bdIA                                                    | 410781354.9   | 899531154.1 | 2.189805217  | COG0840 | N | Methyl-accepting chemotaxis protein                                                | K03406 | CELLULAR PROCESSES AND SIGNALING   |
| PA1444 | fln  | flagellar motor switch protein Flin                     | 0             | 57258208.72 | 1000         | COG1886 | N | Flagellar motor switch/type III secretory pathway protein                          | K02417 | CELLULAR PROCESSES AND SIGNALING   |
| PA1444 | fln  | flagellar motor switch protein Flin                     | 0             | 57258208.72 | 1000         | COG1886 | U | Flagellar motor switch/type III secretory pathway protein                          | K02417 | CELLULAR PROCESSES AND SIGNALING   |
| PA1444 | fln  | flagellar motor switch protein Flin                     | 0             | 57258208.72 | 1000         | COG1886 | U | Flagellar motor switch/type III secretory pathway protein                          | K02417 | CELLULAR PROCESSES AND SIGNALING   |
| PA1444 | fln  | flagellar motor switch protein Flin                     | 0             | 57258208.72 | 1000         | COG1886 | N | Flagellar motor switch/type III secretory pathway protein                          | K03225 | CELLULAR PROCESSES AND SIGNALING   |
| PA1457 | cheZ | chemotaxis protein CheZ                                 | 1137381664    | 476975920.2 | 0.419363117  | COG3143 | T | Chemotaxis protein                                                                 | K03414 | CELLULAR PROCESSES AND SIGNALING   |
| PA1457 | cheZ | chemotaxis protein CheZ                                 | 834184401.7   | 460449269   | 0.5519754    | COG3143 | T | Chemotaxis protein                                                                 | K03414 | CELLULAR PROCESSES AND SIGNALING   |
| PA1457 | cheZ | chemotaxis protein CheZ                                 | 834184401.7   | 460449269   | 0.5519754    | COG3143 | T | Chemotaxis protein                                                                 | K03414 | CELLULAR PROCESSES AND SIGNALING   |
| PA1457 | cheZ | chemotaxis protein CheZ                                 | 834184401.7   | 460449269   | 0.5519754    | COG3143 | T | Chemotaxis protein                                                                 | K03414 | CELLULAR PROCESSES AND SIGNALING   |
| PA1457 | cheZ | chemotaxis protein CheZ                                 | 1137381664    | 476975920.2 | 0.419363117  | COG3143 | T | Chemotaxis protein                                                                 | K03414 | CELLULAR PROCESSES AND SIGNALING   |
| PA1457 | cheZ | chemotaxis protein CheZ                                 | 834184401.7   | 460449269   | 0.5519754    | COG3143 | T | Chemotaxis protein                                                                 | K03414 | CELLULAR PROCESSES AND SIGNALING   |
| PA1457 | cheZ | chemotaxis protein CheZ                                 | 834184401.7   | 460449269   | 0.5519754    | COG3143 | T | Chemotaxis protein                                                                 | K03414 | CELLULAR PROCESSES AND SIGNALING   |
| PA1458 |      | probable two-component sensor                           | 47794573.77   | 0           | 0            | COG2198 | T | FOG: HPI domain                                                                    | K07647 | CELLULAR PROCESSES AND SIGNALING   |
| PA1458 |      | probable two-component sensor                           | 47794573.77   | 0           | 0            | COG2198 | T | FOG: HPI domain                                                                    | K07676 | CELLULAR PROCESSES AND SIGNALING   |
| PA1458 |      | probable two-component sensor                           | 47794573.77   | 0           | 0            | COG0643 | T | Chemotaxis protein histidine kinase and related kinases                            | K03407 | CELLULAR PROCESSES AND SIGNALING   |
| PA1458 |      | probable two-component sensor                           | 47794573.77   | 0           | 0            | COG0643 | T | Chemotaxis protein histidine kinase and related kinases                            | K03487 | CELLULAR PROCESSES AND SIGNALING   |
| PA1458 |      | probable two-component sensor                           | 47794573.77   | 0           | 0            | COG0643 | T | Chemotaxis protein histidine kinase and related kinases                            | K06596 | CELLULAR PROCESSES AND SIGNALING   |
| PA1458 |      | probable two-component sensor                           | 47794573.77   | 0           | 0            | COG0643 | N | Chemotaxis protein histidine kinase and related kinases                            | K03407 | CELLULAR PROCESSES AND SIGNALING   |
| PA1458 |      | probable two-component sensor                           | 47794573.77   | 0           | 0            | COG2198 | T | FOG: HPI domain                                                                    | K07679 | CELLULAR PROCESSES AND SIGNALING   |
| PA1458 |      | probable two-component sensor                           | 47794573.77</ |             |              |         |   |                                                                                    |        |                                    |



|        |       |                                                                |              |             |             |         |   |                                                                                |        |                                    |
|--------|-------|----------------------------------------------------------------|--------------|-------------|-------------|---------|---|--------------------------------------------------------------------------------|--------|------------------------------------|
| PA1596 | htpG  | heat shock protein HtpG                                        | 26337526.66  | 26200937.07 | 2.513559366 | COG0326 | O | "Molecular chaperone, HSP90 family"                                            | K04079 | CELLULAR PROCESSES AND SIGNALING   |
| PA1608 |       | probable chemotaxis transducer                                 | 410781354.9  | 899531154.1 | 2.189805217 | COG0840 | N | Methyl-accepting chemotaxis protein                                            | K03406 | CELLULAR PROCESSES AND SIGNALING   |
| PA1608 |       | probable chemotaxis transducer                                 | 410781354.9  | 899531154.1 | 2.189805217 | COG0840 | T | Methyl-accepting chemotaxis protein                                            | K03406 | CELLULAR PROCESSES AND SIGNALING   |
| PA1615 |       | probable ligase                                                | 333550597.1  | 456489799.7 | 1.368577372 |         |   |                                                                                |        |                                    |
| PA1641 |       | hypothetical protein                                           | 0            | 18936738.03 | 1000        |         |   |                                                                                |        |                                    |
| PA1646 |       | probable chemotaxis transducer                                 | 410781354.9  | 899531154.1 | 2.189805217 | COG0840 | N | Methyl-accepting chemotaxis protein                                            | K03406 | CELLULAR PROCESSES AND SIGNALING   |
| PA1646 |       | probable chemotaxis transducer                                 | 410781354.9  | 899531154.1 | 2.189805217 | COG0840 | T | Methyl-accepting chemotaxis protein                                            | K03406 | CELLULAR PROCESSES AND SIGNALING   |
| PA1657 | hsiB2 | HsiB2                                                          | 145557781.6  | 0           | 0           | COG3516 | S | Uncharacterized protein conserved in bacteria                                  | K11901 | POORLY CHARACTERIZED               |
| PA1673 |       | hypothetical protein                                           | 11695062.85  | 0           | 0           | COG2703 | P | Hemerythrin                                                                    | K07216 | METABOLISM                         |
| PA1707 | pcrH  | regulatory protein PcrH                                        | 154884185.2  | 392990265.4 | 2.53731693  |         |   |                                                                                |        |                                    |
| PA1708 | popB  | translocator protein PopB                                      | 38289643.39  | 0           | 0           |         |   |                                                                                |        |                                    |
| PA1709 | popD  | Translocator outer membrane protein PopD precursor             | 398133703.51 | 16160310.01 | 0.405906067 | COJ1049 | C | Aconitase B                                                                    | K01682 | METABOLISM                         |
| PA1722 | pscl  | type III export protein Pscl                                   | 0            | 43171956.9  | 1000        |         |   |                                                                                |        |                                    |
| PA1746 |       | hypothetical protein                                           | 187433183.6  | 547179691.7 | 2.919332006 |         |   |                                                                                |        |                                    |
| PA1749 |       | hypothetical protein                                           | 912328297.1  | 615681274.9 | 0.67484619  | COG2388 | R | Predicted acetyltransferase                                                    | K06975 | POORLY CHARACTERIZED               |
| PA1750 |       | phospho-2-dehydro-3-deoxyheptonate aldolase                    | 516831429.16 | 0           | 0           | COG0722 | S | 3-deoxy-D-arabino-heptulosin-7-phosphate (DAHP) synthase                       | K01625 | METABOLISM                         |
| PA1772 |       | probable methyltransferase                                     | 489430404.9  | 33779708.7  | 0.723337552 | COG0684 | H | Dimethylmenaquinone methyltransferase                                          | K02553 | METABOLISM                         |
| PA1777 | oprF  | Major porin and structural outer membrane porin OprF precursor | 1.09255E+11  | 1.4122E+11  | 1.292568171 | COG2885 | M | Outer membrane protein and related peptidoglycan-associated (lipol)proteins    | K03286 | CELLULAR PROCESSES AND SIGNALING   |
| PA1777 | oprF  | Major porin and structural outer membrane porin OprF precursor | 1.09255E+11  | 1.4122E+11  | 1.292568171 | COG2885 | M | Outer membrane protein and related peptidoglycan-associated (lipol)proteins    | K03640 | CELLULAR PROCESSES AND SIGNALING   |
| PA1777 | oprF  | Major porin and structural outer membrane porin OprF precursor | 1.09255E+11  | 1.4122E+11  | 1.292568171 | COG3047 | M | Outer membrane protein W                                                       | K07275 | CELLULAR PROCESSES AND SIGNALING   |
| PA1787 | acnB  | aconitate hydratase 2                                          | 1263463778   | 1419968005  | 1.124759402 | COG1049 | C | Aconitase B                                                                    | K01682 | METABOLISM                         |
| PA1793 | ppilB | peptidyl-prolyl cis-trans isomerase B                          | 22223001730  | 13013589146 | 0.58559097  | COG0652 | O | Peptidyl-prolyl cis-trans isomerase (rotamase) - cyclophilin family            | K01768 | CELLULAR PROCESSES AND SIGNALING   |
| PA1793 | ppilB | peptidyl-prolyl cis-trans isomerase B                          | 22223001730  | 13013589146 | 0.58559097  | COG0652 | O | Peptidyl-prolyl cis-trans isomerase (rotamase) - cyclophilin family            | K01802 | CELLULAR PROCESSES AND SIGNALING   |
| PA1793 | ppilB | peptidyl-prolyl cis-trans isomerase B                          | 22223001730  | 13013589146 | 0.58559097  | COG0652 | O | Peptidyl-prolyl cis-trans isomerase (rotamase) - cyclophilin family            | K01767 | CELLULAR PROCESSES AND SIGNALING   |
| PA1800 | tlg   | trigger factor                                                 | 11935591909  | 3277448670  | 0.777282803 | COG5644 | O | K88F-type peptidyl-prolyl cis-trans isomerase (trigger factor)                 | K03545 | CELLULAR PROCESSES AND SIGNALING   |
| PA1801 | cipP  | CipP                                                           | 0            | 28781910.22 | 1000        | COG740  | O | Protease subunit of ATP-dependent Cip proteases                                | K01350 | CELLULAR PROCESSES AND SIGNALING   |
| PA1801 | cipP  | CipP                                                           | 0            | 28781910.22 | 1000        | COG740  | O | Protease subunit of ATP-dependent Cip proteases                                | K01358 | CELLULAR PROCESSES AND SIGNALING   |
| PA1802 | cipX  | CipX                                                           | 1779211752   | 1053963559  | 5.932E-02   | COG1219 | O | "ATP-dependent protease Cip, ATPase subunit"                                   | K03544 | CELLULAR PROCESSES AND SIGNALING   |
| PA1804 | hupB  | DNA-binding protein HU                                         | 336646224    | 3431277453  | 10.1925624  | COG0776 | L | Bacterial nucleoid DNA-binding protein                                         | K05788 | INFORMATION STORAGE AND PROCESSING |
| PA1804 | hupB  | DNA-binding protein HU                                         | 336646224    | 3431277453  | 10.1925624  | COG0776 | L | Bacterial nucleoid DNA-binding protein                                         | K04764 | INFORMATION STORAGE AND PROCESSING |
| PA1804 | hupB  | DNA-binding protein HU                                         | 336646224    | 3431277453  | 10.1925624  | COG0776 | L | Bacterial nucleoid DNA-binding protein                                         | K05787 | INFORMATION STORAGE AND PROCESSING |
| PA1804 | hupB  | DNA-binding protein HU                                         | 336646224    | 3431277453  | 10.1925624  | COG0776 | L | Bacterial nucleoid DNA-binding protein                                         | K03530 | INFORMATION STORAGE AND PROCESSING |
| PA1805 | ppid  | peptidyl-prolyl cis-trans isomerase D                          | 5056673334   | 3700691004  | 0.731843004 | COG0760 | O | Parvulin-like peptidyl-prolyl isomerase                                        | K07533 | CELLULAR PROCESSES AND SIGNALING   |
| PA1805 | ppid  | peptidyl-prolyl cis-trans isomerase D                          | 5056673334   | 3700691004  | 0.731843004 | COG0760 | O | Parvulin-like peptidyl-prolyl isomerase                                        | K03769 | CELLULAR PROCESSES AND SIGNALING   |
| PA1805 | ppid  | peptidyl-prolyl cis-trans isomerase D                          | 5056673334   | 3700691004  | 0.731843004 | COG0760 | O | Parvulin-like peptidyl-prolyl isomerase                                        | K03770 | CELLULAR PROCESSES AND SIGNALING   |
| PA1805 | ppid  | peptidyl-prolyl cis-trans isomerase D                          | 5056673334   | 3700691004  | 0.731843004 | COG0760 | O | Parvulin-like peptidyl-prolyl isomerase                                        | K03771 | CELLULAR PROCESSES AND SIGNALING   |
| PA1830 |       | hypothetical protein                                           | 543638717    | 514202505.4 | 0.945853357 |         |   |                                                                                |        |                                    |
| PA1847 | rNfa  | NfaU                                                           | 395844115    | 0           | 0           | COG0316 | S | Uncharacterized conserved protein                                              | K13628 | POORLY CHARACTERIZED               |
| PA1847 | rNfa  | NfaU                                                           | 395844115    | 0           | 0           | COG0316 | S | Uncharacterized conserved protein                                              | K07400 | POORLY CHARACTERIZED               |
| PA1847 | rNfa  | NfaU                                                           | 395844115    | 0           | 0           | COG0694 | O | Thioesteron-like proteins and domains                                          | K07400 | CELLULAR PROCESSES AND SIGNALING   |
| PA1847 | rNfa  | NfaU                                                           | 395844115    | 0           | 0           | COG0694 | O | Thioesteron-like proteins and domains                                          | K13819 | CELLULAR PROCESSES AND SIGNALING   |
| PA1870 |       | hypothetical protein                                           | 105119115.8  | 0           | 0           |         |   |                                                                                |        |                                    |
| PA1930 |       | probable chemotaxis transducer                                 | 410781354.9  | 899531154.1 | 2.189805217 | COG0840 | T | Methyl-accepting chemotaxis protein                                            | K03406 | CELLULAR PROCESSES AND SIGNALING   |
| PA1930 |       | probable chemotaxis transducer                                 | 410781354.9  | 899531154.1 | 2.189805217 | COG0840 | N | Methyl-accepting chemotaxis protein                                            | K03406 | CELLULAR PROCESSES AND SIGNALING   |
| PA1930 |       | probable chemotaxis transducer                                 | 410781354.9  | 899531154.1 | 2.189805217 | COG0840 | T | Methyl-accepting chemotaxis protein                                            | K03406 | CELLULAR PROCESSES AND SIGNALING   |
| PA1969 |       | hypothetical protein                                           | 5302960100   | 3888356292  | 0.733242608 |         |   |                                                                                |        |                                    |
| PA2021 |       | hypothetical protein                                           | 1964551795   | 217132529.2 | 1.10525225  |         |   |                                                                                |        |                                    |
| PA2081 | kyrB  | "tyrosinase formamidase                                        | 0            | 142184986.9 | 1000        | COG1878 | R | Predicted metal-dependent hydrolase                                            | K07130 | POORLY CHARACTERIZED               |
| PA2169 |       | hypothetical protein                                           | 202028103.5  | 0           | 0           |         |   |                                                                                |        |                                    |
| PA2190 |       | conserved hypothetical protein                                 | 108970364.5  | 20501611.5  | 0.188139331 | COG3729 | R | General stress protein                                                         | K06884 | POORLY CHARACTERIZED               |
| PA2204 |       | probable binding protein component of ABC transporter          | 7061994.416  | 0           | 0           | COG0834 | E | "ABC-type amino acid transport/signal transduction systems, periplasmic compo" | K02030 | METABOLISM                         |
| PA2204 |       | probable binding protein component of ABC transporter          | 7061994.416  | 0           | 0           | COG0834 | E | "ABC-type amino acid transport/signal transduction systems, periplasmic compo" | K02030 | CELLULAR PROCESSES AND SIGNALING   |
| PA2234 | pslD  | pslD                                                           | 45178375.13  | 0           | 0           | COG1596 | M | Periplasmic protein involved in polysaccharide export                          | K01991 | CELLULAR PROCESSES AND SIGNALING   |
| PA2247 | bkdA1 | 2-oxoisovalerate dehydrogenase (alpha subunit)                 | 148949375.18 | 0           | 0           | COG1071 | C | "Pyruvate/2-oxoglutarate dehydrogenase complex, dehydrogenase (E1) component." | K11381 | METABOLISM                         |
| PA2247 | bkdA1 | 2-oxoisovalerate dehydrogenase (alpha subunit)                 | 148949375.18 | 0           | 0           | COG1071 | C | "Pyruvate/2-oxoglutarate dehydrogenase complex, dehydrogenase (E1) component." | K00166 | METABOLISM                         |
| PA2247 | bkdA1 | 2-oxoisovalerate dehydrogenase (alpha subunit)                 | 148949375.18 | 0           | 0           | COG1071 | C | "Pyruvate/2-oxoglutarate dehydrogenase complex, dehydrogenase (E1) component." | K00161 | METABOLISM                         |
| PA2264 |       | conserved hypothetical protein                                 | 153696503.9  | 99523657.81 | 0.647533187 |         |   |                                                                                |        |                                    |
| PA2331 |       | hypothetical protein                                           | 1623568184   | 1533859046  | 0.944745691 | COG2128 | S | Uncharacterized conserved protein                                              | K04756 | POORLY CHARACTERIZED               |
| PA2381 |       | hypothetical protein                                           | 324807563.5  | 203305703   | 0.625926628 |         |   |                                                                                |        |                                    |
| PA2385 | pvdQ  | 3-oxo-C12-homoserine lactone acylase PvdQ                      | 620406501.7  | 594553427.1 | 0.958328814 | COG2366 | R | Protein related to penicillin acylase                                          | K07116 | POORLY CHARACTERIZED               |
| PA2385 | pvdQ  | 3-oxo-C12-homoserine lactone acylase PvdQ                      | 620406501.7  | 594553427.1 | 0.958328814 | COG2366 | R | Protein related to penicillin acylase                                          | K01434 | POORLY CHARACTERIZED               |
| PA2393 |       | peptide dipetidase                                             | 450245318.3  | 180320080   | 0.404933972 | COG2355 | E | "Zn-dependent dipetidase, microsomal dipetidase homolog"                       | K01273 | METABOLISM                         |
| PA2395 | pvdD  | pvdD                                                           | 1045614477   | 617124131.2 | 0.590023661 |         |   |                                                                                |        |                                    |
| PA2396 | pvdF  | polyketide synthetase F                                        | 38175033.64  | 198210612.7 | 5.192152929 | COG0299 | F | Folate-dependent phosphoribosylglycylcinamide formyltransferase PuvF           | K11175 | METABOLISM                         |
| PA2410 | fpvF  | fpvF                                                           | 2131515173   | 148413020.7 | 0.641005539 | COG0803 | P | "ABC-type metal ion transport system, periplasmic component/surface adhesin"   | K08815 | METABOLISM                         |
| PA2410 | fpvF  | fpvF                                                           | 2131515173   | 148413020.7 | 0.641005539 | COG0803 | P | "ABC-type metal ion transport system, periplasmic component/surface adhesin"   | K03818 | CELLULAR PROCESSES AND SIGNALING   |
| PA2410 | fpvF  | fpvF                                                           | 2131515173   | 148413020.7 | 0.641005539 | COG0803 | P | "ABC-type metal ion transport system, periplasmic component/surface adhesin"   | K02077 | METABOLISM                         |
| PA2412 |       | conserved hypothetical protein                                 | 1228116152   | 2076199344  | 1.69055568  | COG3251 | S | Uncharacterized protein conserved in bacteria                                  | K05375 | POORLY CHARACTERIZED               |
| PA2413 | pvdH  | "L-2                                                           | 16904917.73  | 19946518.89 | 1.179924044 | COG1010 | E | 4-aminobutyrate aminotransferase and related aminotransferases                 | K00823 | METABOLISM                         |
| PA2413 | pvdH  | "L-2                                                           | 16904917.73  | 19946518.89 | 1.179924044 | COG1010 | E | 4-aminobutyrate aminotransferase and related aminotransferases                 | K07250 | METABOLISM                         |
| PA2413 | pvdH  | "L-2                                                           | 16904917.73  | 19946518.89 | 1.179924044 | COG1010 | E | 4-aminobutyrate aminotransferase and related aminotransferases                 | K00836 | METABOLISM                         |
| PA2433 |       | hypothetical protein                                           | 218192623.1  | 54455110.59 | 0.249573564 |         |   |                                                                                |        |                                    |
| PA2446 | gcvH2 | glycine cleavage system protein H2                             | 242156555.2  | 131486555.7 | 0.46864953  | COG0509 | E | Glycine cleavage system H protein (lipote-binding)                             | K02437 | METABOLISM                         |
| PA2453 |       | hypothetical protein                                           | 455778159.4  | 143732839.4 | 3.153569891 |         |   |                                                                                |        |                                    |
| PA2476 | dsbG  | thiol:disulfide interchange protein DsbG                       | 63173098.12  | 0           | 0           | COG1651 | O | Protein-disulfide isomerase                                                    | K03981 | CELLULAR PROCESSES AND SIGNALING   |
| PA2476 | dsbG  | thiol:disulfide interchange protein DsbG                       | 63173098.12  | 0           | 0           | COG1651 | O | Protein-disulfide isomerase                                                    | K03805 | CELLULAR PROCESSES AND SIGNALING   |
| PA2507 | catA  | "cataloch 1                                                    | 357811508.3  | 1794087990  | 5.014058934 | COG3485 | Q | "Protoacatechuate 3,4-dioxygenase beta subunit"                                | K00449 | METABOLISM                         |
| PA2507 | catA  | "cataloch 1                                                    | 357811508.3  | 1794087990  | 5.014058934 | COG3485 | Q | "Protoacatechuate 3,4-dioxygenase beta subunit"                                | K01381 | METABOLISM                         |
| PA2507 | catA  | "cataloch 1                                                    | 357811508.3  | 1794087990  | 5.014058934 | COG3485 | Q | "Protoacatechuate 3,4-dioxygenase beta subunit"                                | K00448 | METABOLISM                         |
| PA2508 | catC  | muconalactone delta-isomerase                                  | 88074162     | 39030931.9  | 0.443250672 | COG429  | Q | Muconalactone delta-isomerase                                                  | K01421 | CELLULAR PROCESSES AND SIGNALING   |
| PA2508 | catC  | muconalactone delta-isomerase                                  | 88074162     | 39030931.9  | 0.443250672 | COG429  | Q | Muconalactone delta-isomerase                                                  | K01464 | METABOLISM                         |
| PA2532 | tpx   | thiol peroxidase                                               | 157780541.4  | 202406558.2 | 1.282835997 | COG2077 | O | Peroxisedoxin                                                                  | K11065 | CELLULAR PROCESSES AND SIGNALING   |
| PA2561 | ctpH  | CtpH                                                           | 410781354.9  | 90189680.6  | 2.19556382  | COG0840 | T | Methyl-accepting chemotaxis protein                                            | K03406 | CELLULAR PROCESSES AND SIGNALING   |
| PA2561 | ctpH  | CtpH                                                           | 410781354.9  | 90189680.6  | 2.19556382  | COG0840 | N | Methyl-accepting chemotaxis protein                                            | K03406 | CELLULAR PROCESSES AND SIGNALING   |
| PA2573 |       | probable chemotaxis transducer                                 | 513541374.9  | 899531154.1 | 1.751623527 | COG0840 | N | Methyl-accepting chemotaxis protein                                            | K03406 | CELLULAR PROCESSES AND SIGNALING   |
| PA2573 |       | probable chemotaxis transducer                                 | 513541374.9  | 899531154.1 | 1.751623527 | COG0840 | T | Methyl-accepting chemotaxis protein                                            | K03406 | CELLULAR PROCESSES AND SIGNALING   |
| PA2575 |       | hypothetical protein                                           | 133842906.0  | 0           | 0           | COG3560 | R | Predicted oxidoreductase related to nitroreductase                             | K07078 | POORLY CHARACTERIZED               |
| PA2582 |       | hypothetical protein                                           | 1289105645   | 36625279.9  | 0.284100284 | COG3109 | T | Activator of osmoprotectant transporter ProP                                   | K03607 | CELLULAR PROCESSES AND SIGNALING   |
| PA2612 | serS  | seryl-tRNA synthetase                                          | 0            | 30501225.14 | 1000        | COG1272 | J | Seryl-tRNA synthetase                                                          | K01875 | INFORMATION STORAGE AND PROCESSING |
| PA2614 | loia  | lipoprotein localization protein Loia                          | 9509304.408  | 0           | 0           | COG2834 | M | Outer membrane lipoprotein-sorting protein                                     | K03634 | CELLULAR PROCESSES AND SIGNALING   |
| PA2615 | ftsK  | cell division protein FtsK                                     | 4163455.03   | 84175466.77 | 1.90598822  | COG1674 | D | DNA segregation ATPase FtsK/SpoIIIE and related proteins                       | K03466 | CELLULAR PROCESSES AND SIGNALING   |
| PA2619 | infA  | initiation factor                                              | 42112267.86  | 59027142.08 | 1.401661442 | COG0361 | J | Translation initiation factor 1 (IF-1)                                         | K03236 | INFORMATION STORAGE AND PROCESSING |
| PA2619 | infA  | initiation factor                                              | 42112267.86  | 59027142.08 | 1.401661442 | COG0361 | J | Translation initiation factor 1 (IF-1)                                         | K02518 | INFORMATION STORAGE AND PROCESSING |
| PA2620 | cipA  | ATP-binding protease component CipA                            | 9766321.867  | 0           | 0           | COG0542 | O | "ATPases with chaperone activity, ATP-binding subunit"                         | K03699 | CELLULAR PROCESSES AND SIGNALING   |
| PA2620 | cipA  | ATP-binding protease component CipA                            | 9766321.867  | 0           | 0           | COG0542 | O | "ATPases with chaperone activity, ATP-binding subunit"                         | K03696 | CELLULAR PROCESSES AND SIGNALING   |
| PA2620 | cipA  | ATP-binding protease component CipA                            | 9766321.867  | 0           | 0           | COG0542 | O | "ATPases with chaperone activity, ATP-binding subunit"                         | K11907 | CELLULAR PROCESSES AND SIGNALING   |
| PA2620 | cipA  | ATP-binding protease component CipA                            | 9766321.867  | 0           | 0           | COG0542 | O | "ATPases with chaperone activity, ATP-binding subunit"                         | K03694 | CELLULAR PROCESSES AND SIGNALING   |
| PA2622 | cspD  | Heat shock protein CspD                                        | 479940739.2  | 297864318.1 | 0.620627285 | COG1278 | H | Heat shock protein                                                             | K03741 | INFORMATION STORAGE AND PROCESSING |
| PA2623 | icd   | isocitrate dehydrogenase                                       | 62894949.27  | 505234771.6 | 8.034974501 | COG0538 | C | Isocitrate dehydrogenases                                                      | K00330 | METABOLISM                         |
| PA2623 | icd   | isocitrate dehydrogenase                                       | 62894949.27  | 505234771.6 | 8.034974501 | COG0538 | C | Isocitrate dehydrogenases                                                      | K00031 | METABOLISM                         |
|        |       |                                                                |              |             |             |         |   |                                                                                |        |                                    |

|        |       |                                                 |              |              |             |           |                                                                                                                          |        |                                    |
|--------|-------|-------------------------------------------------|--------------|--------------|-------------|-----------|--------------------------------------------------------------------------------------------------------------------------|--------|------------------------------------|
| PA2966 | acp   | acyl carrier protein                            | 1403535623   | 202582696.1  | 0.14433741  | CG0236.1  | Acyl carrier protein                                                                                                     | K02078 | METABOLISM                         |
| PA2966 | acp   | acyl carrier protein                            | 1403535623   | 202582696.1  | 0.14433741  | CG0236.2  | Acyl carrier protein                                                                                                     | K14188 | METABOLISM                         |
| PA2967 | fabg  | 3-oxoacyl-[acyl-carrier-protein] reductase      | 1598203207   | 2342497878   | 1.196479395 | CG0102.1  | Dehydrogenases with different specificities (related to short-chain alcohol dehydrogenases with different specificities) | K00059 | METABOLISM                         |
| PA2967 | fabg  | 3-oxoacyl-[acyl-carrier-protein] reductase      | 1598203207   | 2342497878   | 1.196479395 | CG0102.2  | Dehydrogenases with different specificities (related to short-chain alcohol dehydrogenases with different specificities) | K00059 | METABOLISM                         |
| PA2968 | fabd  | malonyl-CoA:[acyl-carrier-protein] transacylase | 337275540.8  | 181116655.4  | 0.52835092  | CG0331.1  | (acyl-carrier-protein) 5-malonyltransferase                                                                              | K11533 | METABOLISM                         |
| PA2968 | fabd  | malonyl-CoA:[acyl-carrier-protein] transacylase | 337275540.8  | 181116655.4  | 0.52835092  | CG0331.1  | (acyl-carrier-protein) 5-malonyltransferase                                                                              | K00645 | METABOLISM                         |
| PA2970 | rnfmf | 5S ribosomal protein L32                        | 33332474633  | 3254833701   | 0.97640034  | CG0333.1  | Ribosomal protein L32                                                                                                    | K02911 | INFORMATION STORAGE AND PROCESSING |
| PA2976 | rne   | ribonuclease E                                  | 469289648.1  | 1159662562   | 2.47120762  | CG0153.0  | Ribonucleases G and E                                                                                                    | K03801 | INFORMATION STORAGE AND PROCESSING |
| PA2976 | rne   | ribonuclease E                                  | 469289648.1  | 1159662562   | 2.47120762  | CG0153.0  | Ribonucleases G and E                                                                                                    | K03801 | INFORMATION STORAGE AND PROCESSING |
| PA2980 |       | conserved hypothetical protein                  | 3765283564   | 403390347    | 1.07134086  | CG2835.5  | Uncharacterized conserved protein                                                                                        | K02979 | POORLY CHARACTERIZED               |
| PA2980 |       | hypothetical protein                            | 489839071.2  | 104745831.1  | 0.21387232  |           |                                                                                                                          | K03791 | CELLULAR PROCESSES AND SIGNALING   |
| PA3009 |       | hypothetical protein                            | 650909266.71 | 0            | 0           |           |                                                                                                                          | K03791 | CELLULAR PROCESSES AND SIGNALING   |
| PA3021 |       | hypothetical protein                            | 94596940.62  | 21595444.6   | 0.22406286  |           |                                                                                                                          | K03791 | CELLULAR PROCESSES AND SIGNALING   |
| PA3023 |       | conserved hypothetical protein                  | 3925873.17   | 21540847.8   | 0.54872675  | CG1597.1  | Sphingosine kinase and enzymes related to eukaryotic diacylglycerol kinase                                               | K07029 | POORLY CHARACTERIZED               |
| PA3023 |       | hypothetical protein                            | 3925873.17   | 21540847.8   | 0.54872675  | CG1597.1  | Sphingosine kinase and enzymes related to eukaryotic diacylglycerol kinase                                               | K07029 | METABOLISM                         |
| PA3024 |       | probable carbohydrate kinase                    | 0            | 0            | 0           | CG1070.0  | Sugar (pentulose and hexulose) kinases                                                                                   | K00851 | METABOLISM                         |
| PA3024 |       | probable carbohydrate kinase                    | 0            | 0            | 0           | CG1070.0  | Sugar (pentulose and hexulose) kinases                                                                                   | K00848 | METABOLISM                         |
| PA3024 |       | probable carbohydrate kinase                    | 0            | 0            | 0           | CG1070.0  | Sugar (pentulose and hexulose) kinases                                                                                   | K00854 | METABOLISM                         |
| PA3024 |       | probable carbohydrate kinase                    | 0            | 0            | 0           | CG1070.0  | Sugar (pentulose and hexulose) kinases                                                                                   | K00880 | METABOLISM                         |
| PA3028 | moeA2 | molysulfone cofactor biosynthesis protein A2    | 0            | 25462351.25  | 0           | 0         | Molybdopterin biosynthesis enzyme                                                                                        | K07219 | METABOLISM                         |
| PA3028 | moeA2 | molysulfone cofactor biosynthesis protein A2    | 0            | 25462351.25  | 0           | 0         | Molybdopterin biosynthesis enzyme                                                                                        | K07350 | METABOLISM                         |
| PA3031 |       | hypothetical protein                            | 38902708.98  | 87915883.97  | 0           |           |                                                                                                                          | K03791 | CELLULAR PROCESSES AND SIGNALING   |
| PA3040 |       | conserved hypothetical protein                  | 171872953.8  | 303473555.4  | 1.76071327  | CG0457.5  | Uncharacterized conserved protein                                                                                        | K05594 | POORLY CHARACTERIZED               |
| PA3049 | rnfI  | ribosome modulation factor                      | 279346383.7  | 0            | 0           | CG0130.1  | Ribosome modulation factor                                                                                               | K03812 | INFORMATION STORAGE AND PROCESSING |
| PA3062 | peIC  | PeIC                                            | 333505516    | 202594469.6  | 0.39257934  |           |                                                                                                                          | K03791 | CELLULAR PROCESSES AND SIGNALING   |
| PA3074 |       | hypothetical protein                            | 447921336.62 | 213684188.43 | 0.07704921  | CG02304.8 | Uncharacterized protein containing a von Willebrand factor type A (vWA) domain                                           | K07114 | POORLY CHARACTERIZED               |
| PA3085 |       | hypothetical protein                            | 7477248.39   | 0            | 0           | CG0139.5  | Uncharacterized protein                                                                                                  | K02916 | CELLULAR PROCESSES AND SIGNALING   |
| PA3101 | xcpT  | general secretion pathway protein G             | 1506446780   | 1977706504   | 1.312828658 | CG01265.1 | "Type II secretory pathway, pseudopilin PilG"                                                                            | K02246 | CELLULAR PROCESSES AND SIGNALING   |
| PA3101 | xcpT  | general secretion pathway protein G             | 1506446780   | 1977706504   | 1.312828658 | CG01265.1 | "Type II secretory pathway, pseudopilin PilG"                                                                            | K02246 | CELLULAR PROCESSES AND SIGNALING   |
| PA3101 | xcpT  | general secretion pathway protein G             | 1506446780   | 1977706504   | 1.312828658 | CG01265.1 | "Type II secretory pathway, pseudopilin PilG"                                                                            | K02679 | CELLULAR PROCESSES AND SIGNALING   |
| PA3101 | xcpT  | general secretion pathway protein G             | 1506446780   | 1977706504   | 1.312828658 | CG01265.1 | "Type II secretory pathway, pseudopilin PilG"                                                                            | K02679 | CELLULAR PROCESSES AND SIGNALING   |
| PA3101 | xcpT  | general secretion pathway protein G             | 1506446780   | 1977706504   | 1.312828658 | CG01265.1 | "Type II secretory pathway, pseudopilin PilG"                                                                            | K02679 | CELLULAR PROCESSES AND SIGNALING   |
| PA3101 | xcpT  | general secretion pathway protein G             | 1506446780   | 1977706504   | 1.312828658 | CG01265.1 | "Type II secretory pathway, pseudopilin PilG"                                                                            | K02679 | CELLULAR PROCESSES AND SIGNALING   |
| PA3101 | xcpT  | general secretion pathway protein G             | 1506446780   | 1977706504   | 1.312828658 | CG01265.1 | "Type II secretory pathway, pseudopilin PilG"                                                                            | K02679 | CELLULAR PROCESSES AND SIGNALING   |
| PA3101 | xcpT  | general secretion pathway protein G             | 1506446780   | 1977706504   | 1.312828658 | CG01265.1 | "Type II secretory pathway, pseudopilin PilG"                                                                            | K02679 | CELLULAR PROCESSES AND SIGNALING   |

|        |       |                                                                    |             |              |   |           |                                                                          |                                                                                 |                                    |                                    |
|--------|-------|--------------------------------------------------------------------|-------------|--------------|---|-----------|--------------------------------------------------------------------------|---------------------------------------------------------------------------------|------------------------------------|------------------------------------|
| PA3562 | frl   | "phosphotransferase system transporter enzyme I                    | 25574432.54 | 0            | 0 | COG1925 G | "Phosphotransferase system, HPr-related proteins"                        | K02768                                                                          | METABOLISM                         |                                    |
| PA3562 | frl   | "phosphotransferase system transporter enzyme I                    | 25574432.54 | 0            | 0 | COG1925 G | "Phosphotransferase system, HPr-related proteins"                        | K11183                                                                          | METABOLISM                         |                                    |
| PA3562 | frl   | "phosphotransferase system transporter enzyme I                    | 25574432.54 | 0            | 0 | COG1925 G | "Phosphotransferase system, HPr-related proteins"                        | K08485                                                                          | METABOLISM                         |                                    |
| PA3562 | frl   | "phosphotransferase system transporter enzyme I                    | 25574432.54 | 0            | 0 | COG1925 G | "Phosphotransferase system, HPr-related proteins"                        | K02784                                                                          | METABOLISM                         |                                    |
| PA3562 | frl   | "phosphotransferase system transporter enzyme I                    | 25574432.54 | 0            | 0 | COG4668 G | "Mannitol/fructose-specific phosphotransferase system, IIA domain"       | K02799                                                                          | METABOLISM                         |                                    |
| PA3562 | frl   | "phosphotransferase system transporter enzyme I                    | 25574432.54 | 0            | 0 | COG1925 G | "Phosphotransferase system, HPr-related proteins"                        | K08483                                                                          | METABOLISM                         |                                    |
| PA3562 | frl   | "phosphotransferase system transporter enzyme I                    | 25574432.54 | 0            | 0 | COG1925 G | "Phosphotransferase system, HPr-related proteins"                        | K11189                                                                          | METABOLISM                         |                                    |
| PA3562 | frl   | "phosphotransferase system transporter enzyme I                    | 25574432.54 | 0            | 0 | COG1080 G | Phosphoenolpyruvate protein kinase (PTS system EI component in bacteria) | K11189                                                                          | METABOLISM                         |                                    |
| PA3580 |       | conserved hypothetical protein                                     | 18272916.64 | 0            | 0 | COG2606 S | Uncharacterized conserved protein                                        | K03976                                                                          | POORLY CHARACTERIZED               |                                    |
| PA3611 |       | hypothetical protein                                               | 66674427.32 | 29729536.01  | 0 | 0         | 0                                                                        | 0                                                                               | 0                                  |                                    |
| PA3621 | fdxA  | ferredoxin I                                                       | 1590982361  | 1405891135   | 0 | 0         | COG1146 C                                                                | Ferredoxin                                                                      | K05524                             | METABOLISM                         |
| PA3621 | fdxA  | ferredoxin I                                                       | 1590982361  | 1405891135   | 0 | 0         | COG1146 C                                                                | Ferredoxin                                                                      | K02176                             | METABOLISM                         |
| PA3635 | eno   | enolase                                                            | 11065429845 | 7549911594   | 0 | 0         | COG0828 I                                                                | Enolase                                                                         | K01689                             | METABOLISM                         |
| PA3639 | acCA  | acetyl-coenzyme A carboxylase carboxyl transferase (alpha subunit) | 1102954987  | 30076743.8   | 0 | 0         | COG0825 I                                                                | Acetyl-CoA carboxylase alpha subunit                                            | K01963                             | METABOLISM                         |
| PA3639 | acCA  | acetyl-coenzyme A carboxylase carboxyl transferase (alpha subunit) | 1102954987  | 30076743.8   | 0 | 0         | COG0825 I                                                                | Acetyl-CoA carboxylase alpha subunit                                            | K02962                             | METABOLISM                         |
| PA3647 |       | probable outer membrane protein precursor                          | 7564265087  | 1406003225   | 1 | 1         | COG0825 G                                                                | Outer membrane protein                                                          | K05142                             | CELLULAR PROCESSES AND SIGNALING   |
| PA3653 | frf   | ribosome recycling factor                                          | 1047304968  | 6072247426   | 0 | 0         | COG1233 G                                                                | Ribosome recycling factor                                                       | K02638                             | INFORMATION STORAGE AND PROCESSING |
| PA3655 | tsf   | elongation factor Ts                                               | 1871173339  | 1818209895   | 0 | 0         | COG0264 J                                                                | Translation elongation factor Ts                                                | K02357                             | INFORMATION STORAGE AND PROCESSING |
| PA3656 | rpsB  | 30S ribosomal protein S2                                           | 1224185255  | 1173397877   | 0 | 0         | COG0052 J                                                                | Ribosomal protein S2                                                            | K02967                             | INFORMATION STORAGE AND PROCESSING |
| PA3657 | map   | methionine aminopeptidase                                          | 25761261.18 | 0            | 0 | COG0024 J | Methionine aminopeptidase                                                | K01265                                                                          | INFORMATION STORAGE AND PROCESSING |                                    |
| PA3664 |       | hypothetical protein                                               | 11905111.14 | 0            | 0 | COG1393 P | "Arsenate reductase and related proteins, glutaredoxin family"           | K02537                                                                          | METABOLISM                         |                                    |
| PA3674 |       | hypothetical protein                                               | 16090488.32 | 0            | 0 | COG1126 S | Uncharacterized protein conserved in bacteria                            | K09914                                                                          | POORLY CHARACTERIZED               |                                    |
| PA3675 |       | hypothetical protein                                               | 23330183.42 | 0            | 0 | 0         | 0                                                                        | 0                                                                               | 0                                  |                                    |
| PA3686 | adk   | adenylate kinase                                                   | 4659778607  | 2375662482   | 0 | 0         | COG0563 F                                                                | Adenylate kinase and related kinases                                            | K00939                             | METABOLISM                         |
| PA3688 |       | hypothetical protein                                               | 813485952.7 | 1604790415   | 1 | 1         | COG1801 S                                                                | 0                                                                               | 0                                  |                                    |
| PA3691 |       | hypothetical protein                                               | 15964608850 | 8271387072   | 0 | 0         | 0                                                                        | 0                                                                               | 0                                  |                                    |
| PA3696 | lptF  | "Lipotofon F"                                                      | 1239376140  | 9069333564   | 0 | 0         | COG2885 M                                                                | Outer membrane protein and related peptidoglycan-associated [lipol]proteins     | K03286                             | CELLULAR PROCESSES AND SIGNALING   |
| PA3696 | lptF  | "Lipotofon F"                                                      | 1239376140  | 9069333564   | 0 | 0         | COG2885 M                                                                | Outer membrane protein and related peptidoglycan-associated [lipol]proteins     | K03640                             | CELLULAR PROCESSES AND SIGNALING   |
| PA3698 |       | hypothetical protein                                               | 255151012   | 144981008.9  | 0 | 0         | COG2885 M                                                                | Outer membrane protein and related peptidoglycan-associated [lipol]proteins     | K03640                             | CELLULAR PROCESSES AND SIGNALING   |
| PA3708 | wsrPA | probable chemotaxis transducer                                     | 640836828   | 8386007.4    | 0 | 0         | COG0840 N                                                                | Methyl-accepting chemotaxis protein                                             | K03406                             | CELLULAR PROCESSES AND SIGNALING   |
| PA3708 | wsrPA | probable chemotaxis transducer                                     | 640836828   | 8386007.4    | 0 | 0         | COG0840 N                                                                | Methyl-accepting chemotaxis protein                                             | K03406                             | CELLULAR PROCESSES AND SIGNALING   |
| PA3712 |       | hypothetical protein                                               | 252833111.7 | 378057939.7  | 1 | 1         | COG0840 N                                                                | Methyl-accepting chemotaxis protein                                             | K03406                             | CELLULAR PROCESSES AND SIGNALING   |
| PA3716 |       | hypothetical protein                                               | 41193007.55 | 18028508.99  | 0 | 0         | 0                                                                        | 0                                                                               | 0                                  |                                    |
| PA3731 |       | conserved hypothetical protein                                     | 823503063.5 | 287493027.1  | 0 | 0         | COG1842 K                                                                | "Phage shock protein A (M30), suppresses sigma54-dependent transcription"       | K03969                             | INFORMATION STORAGE AND PROCESSING |
| PA3731 |       | conserved hypothetical protein                                     | 823503063.5 | 287493027.1  | 0 | 0         | COG1842 K                                                                | "Phage shock protein A (M30), suppresses sigma54-dependent transcription"       | K03969                             | INFORMATION STORAGE AND PROCESSING |
| PA3745 | rpsP  | 30S ribosomal protein S16                                          | 61743449.18 | 409417372.9  | 0 | 0         | COG0228 J                                                                | Ribosomal protein S16                                                           | K02959                             | INFORMATION STORAGE AND PROCESSING |
| PA3746 | fhf   | signal recognition particle protein Fhf                            | 641764225.5 | 878875876.2  | 1 | 1         | COG0541 A                                                                | Signal recognition particle GTPase                                              | K03106                             | CELLULAR PROCESSES AND SIGNALING   |
| PA3753 |       | conserved hypothetical protein                                     | 595884242.5 | 17426752.7   | 0 | 0         | COG0663 R                                                                | "Carbonyl anhydrase/acetyltransferase, isoleucine patch superfamily"            | K08279                             | POORLY CHARACTERIZED               |
| PA3765 |       | hypothetical protein                                               | 19952495.84 | 0            | 0 | COG0644 S | Uncharacterized protein conserved in bacteria                            | K09965                                                                          | POORLY CHARACTERIZED               |                                    |
| PA3785 |       | conserved hypothetical protein                                     | 6832920069  | 202430389    | 0 | 0         | COG2847 S                                                                | Uncharacterized protein conserved in bacteria                                   | K09796                             | POORLY CHARACTERIZED               |
| PA3790 | oprC  | Putative copper transport outer membrane porin OprC precursor      | 90488930.68 | 343979556.7  | 0 | 0         | COG4774 P                                                                | Outer membrane receptor for monomeric catechols                                 | K02014                             | METABOLISM                         |
| PA3790 | oprC  | Putative copper transport outer membrane porin OprC precursor      | 90488930.68 | 343979556.7  | 0 | 0         | COG4774 P                                                                | "Outer membrane receptor proteins, mostly Fe transport"                         | K02014                             | METABOLISM                         |
| PA3801 |       | conserved hypothetical protein                                     | 1284661206  | 1983907668   | 1 | 1         | COG5041 T                                                                | 0                                                                               | 0                                  |                                    |
| PA3804 |       | hypothetical protein                                               | 322315518.4 | 859529584    | 2 | 2         | COG3477 F                                                                | 0                                                                               | 0                                  |                                    |
| PA3805 | plfF  | type 4 fimbrial biogenesis protein PlfF                            | 378548974.7 | 66330458.68  | 0 | 0         | COG3063 U                                                                | Tip plus assembly protein PlfF                                                  | K02656                             | CELLULAR PROCESSES AND SIGNALING   |
| PA3805 | plfF  | type 4 fimbrial biogenesis protein PlfF                            | 378548974.7 | 66330458.68  | 0 | 0         | COG3063 U                                                                | Tip plus assembly protein PlfF                                                  | K02656                             | CELLULAR PROCESSES AND SIGNALING   |
| PA3807 | ndk   | nucleoside diphosphate kinase                                      | 3759967308  | 9526455320   | 1 | 1         | COG0053 N                                                                | Nucleoside diphosphate kinase                                                   | K00940                             | METABOLISM                         |
| PA3808 |       | conserved hypothetical protein                                     | 14991631.85 | 0            | 0 | 0         | 0                                                                        | 0                                                                               | 0                                  |                                    |
| PA3809 | fdx2  | ferredoxin [2Fe-2S]                                                | 105816820   | 80554886.01  | 0 | 0         | COG0633 C                                                                | Ferredoxin                                                                      | K11107                             | METABOLISM                         |
| PA3809 | fdx2  | ferredoxin [2Fe-2S]                                                | 105816820   | 80554886.01  | 0 | 0         | COG0633 C                                                                | Ferredoxin                                                                      | K04755                             | METABOLISM                         |
| PA3809 | fdx2  | ferredoxin [2Fe-2S]                                                | 105816820   | 80554886.01  | 0 | 0         | COG0633 C                                                                | Ferredoxin                                                                      | K02639                             | METABOLISM                         |
| PA3813 | iscU  | probable iron-binding protein IscU                                 | 189292480   | 3061225715   | 1 | 1         | COG0822 C                                                                | NiRf homolog involved in Fe-S cluster formation                                 | K13819                             | METABOLISM                         |
| PA3813 | iscU  | probable iron-binding protein IscU                                 | 189292480   | 3061225715   | 1 | 1         | COG0822 C                                                                | NiRf homolog involved in Fe-S cluster formation                                 | K04821                             | METABOLISM                         |
| PA3816 | cytE  | O-acetylserine synthase                                            | 95473020.06 | 1331009753   | 1 | 1         | COG1045 E                                                                | Serine acetyltransferase                                                        | K00640                             | METABOLISM                         |
| PA3819 |       | conserved hypothetical protein                                     | 15674307.89 | 0            | 0 | COG1314 S | Predicted outer membrane lipoprotein                                     | K06077                                                                          | POORLY CHARACTERIZED               |                                    |
| PA3834 | valS  | valyl-tRNA synthetase                                              | 0           | 60181313.96  | 0 | 0         | COG0525 J                                                                | Valyl-tRNA synthetase                                                           | K01873                             | INFORMATION STORAGE AND PROCESSING |
| PA3836 |       | hypothetical protein                                               | 179122297.8 | 0            | 0 | COG2984 R | "ABC-type uncharacterized transport system, periplasmic component"       | K01989                                                                          | POORLY CHARACTERIZED               |                                    |
| PA3836 |       | hypothetical protein                                               | 570873345.7 | 0            | 0 | 0         | 0                                                                        | 0                                                                               | 0                                  |                                    |
| PA3910 | eddA  | "Extracellular DNA degradation protein"                            | 0           | 442499171    | 0 | 0         | COG3540 P                                                                | Phosphodiesterase/alkaline phosphatase D                                        | K01113                             | METABOLISM                         |
| PA3918 | moaC  | molibdopterin biosynthetic protein C                               | 0           | 27745354.86  | 0 | 0         | COG0315 H                                                                | Molybdenum cofactor biosynthesis enzyme                                         | K03637                             | METABOLISM                         |
| PA3931 |       | conserved hypothetical protein                                     | 394284078.8 | 176959242    | 1 | 1         | COG1464 P                                                                | "ABC-type metal ion transport system, periplasmic component/surface antigen"    | K02073                             | METABOLISM                         |
| PA3940 |       | DNA-binding protein                                                | 4167004413  | 4612225737   | 1 | 1         | COG0776 L                                                                | Bacterial nucleoid DNA-binding protein                                          | K03530                             | INFORMATION STORAGE AND PROCESSING |
| PA3940 |       | probable DNA-binding protein                                       | 4167004413  | 4612225737   | 1 | 1         | COG0776 L                                                                | Bacterial nucleoid DNA-binding protein                                          | K03530                             | INFORMATION STORAGE AND PROCESSING |
| PA3940 |       | probable DNA-binding protein                                       | 4167004413  | 4612225737   | 1 | 1         | COG0776 L                                                                | Bacterial nucleoid DNA-binding protein                                          | K03530                             | INFORMATION STORAGE AND PROCESSING |
| PA3940 |       | probable DNA-binding protein                                       | 4167004413  | 4612225737   | 1 | 1         | COG0776 L                                                                | Bacterial nucleoid DNA-binding protein                                          | K03530                             | INFORMATION STORAGE AND PROCESSING |
| PA3940 |       | probable DNA-binding protein                                       | 4167004413  | 4612225737   | 1 | 1         | COG0776 L                                                                | Bacterial nucleoid DNA-binding protein                                          | K03530                             | INFORMATION STORAGE AND PROCESSING |
| PA3981 |       | conserved hypothetical protein                                     | 36186179.61 | 0            | 0 | COG0202 T | "Phosphate starvation-inducible protein PhoH, predicted ATPase"          | K04764                                                                          | INFORMATION STORAGE AND PROCESSING |                                    |
| PA3983 |       | conserved hypothetical protein                                     | 524192656.6 | 0            | 0 | COG4335 P | Putative Mg2+ and Co2 transporter CorC                                   | K06189                                                                          | METABOLISM                         |                                    |
| PA3988 | lptE  | LPS-assembly lipoprotein LptE                                      | 556786374   | 4278256016   | 0 | 0         | COG2980 M                                                                | Rare lipoprotein B                                                              | K03643                             | CELLULAR PROCESSES AND SIGNALING   |
| PA3999 | dacC  | D-alanine-D-alanine carboxypeptidase                               | 15722381.26 | 0            | 0 | COG1686 M | D-alanyl-D-alanine carboxypeptidase                                      | K02758                                                                          | CELLULAR PROCESSES AND SIGNALING   |                                    |
| PA3999 | dacC  | D-alanine-D-alanine carboxypeptidase                               | 15722381.26 | 0            | 0 | COG1686 M | D-alanyl-D-alanine carboxypeptidase                                      | K02758                                                                          | CELLULAR PROCESSES AND SIGNALING   |                                    |
| PA3999 | dacC  | D-alanine-D-alanine carboxypeptidase                               | 15722381.26 | 0            | 0 | COG1686 M | D-alanyl-D-alanine carboxypeptidase                                      | K02758                                                                          | CELLULAR PROCESSES AND SIGNALING   |                                    |
| PA4005 |       | conserved hypothetical protein                                     | 712662214.2 | 1984943527.4 | 1 | 1         | COG0799 S                                                                | Uncharacterized homolog of plant tolpap protein                                 | K09710                             | POORLY CHARACTERIZED               |
| PA4017 |       | conserved hypothetical protein                                     | 13486670.92 | 21547633.55  | 1 | 1         | COG0702 G                                                                | Predicted nucleoside-diphosphate-sugar epimerases                               | K03056                             | METABOLISM                         |
| PA4017 |       | conserved hypothetical protein                                     | 13486670.92 | 21547633.55  | 1 | 1         | COG0702 G                                                                | Predicted nucleoside-diphosphate-sugar epimerases                               | K03056                             | METABOLISM                         |
| PA4017 |       | conserved hypothetical protein                                     | 13486670.92 | 21547633.55  | 1 | 1         | COG0702 G                                                                | Predicted nucleoside-diphosphate-sugar epimerases                               | K03056                             | METABOLISM                         |
| PA4017 |       | conserved hypothetical protein                                     | 13486670.92 | 21547633.55  | 1 | 1         | COG0702 G                                                                | Predicted nucleoside-diphosphate-sugar epimerases                               | K03056                             | METABOLISM                         |
| PA4017 |       | conserved hypothetical protein                                     | 13486670.92 | 21547633.55  | 1 | 1         | COG0702 G                                                                | Predicted nucleoside-diphosphate-sugar epimerases                               | K03056                             | METABOLISM                         |
| PA4031 | ppa   | inorganic pyrophosphatase                                          | 792878657   | 8260815491   | 1 | 1         | COG0221 C                                                                | Inorganic pyrophosphatase                                                       | K01507                             | METABOLISM                         |
| PA4042 | xseB  | exodeoxyribonuclease VII small subunit                             | 65965651.96 | 17101920.9   | 2 | 2         | COG1722 L                                                                | Exonuclease VII small subunit                                                   | K03602                             | INFORMATION STORAGE AND PROCESSING |
| PA4052 | nuoB  | NuoB protein                                                       | 60784622.05 | 0            | 0 | COG0781 K | Transcription termination factor                                         | K03625                                                                          | INFORMATION STORAGE AND PROCESSING |                                    |
| PA4057 | nrpR  |                                                                    | 16637141.4  | 5086369.8    | 0 | 0         | COG1327 K                                                                | "Predicted transcriptional regulator, consists of a Zn-ribbon and ATP-cone dom" | K07738                             | INFORMATION STORAGE AND PROCESSING |
| PA4057 |       | hypothetical protein                                               | 4522631.18  | 0            | 0 | 0         | 0                                                                        | 0                                                                               | 0                                  |                                    |
| PA4067 | oprG  | Outer membrane protein OprG precursor                              | 3166437156  | 8032937784   | 2 | 2         | COG3047 M                                                                | Outer membrane protein W                                                        | K02725                             | CELLULAR PROCESSES AND SIGNALING   |
| PA4139 |       | hypothetical protein                                               | 1941169183  | 453966303.7  | 0 | 0         | COG3820 P                                                                | 0                                                                               | 0                                  |                                    |
| PA4164 |       | hypothetical protein                                               | 14733106.38 | 0            | 0 | 0         | 0                                                                        | 0                                                                               | 0                                  |                                    |
| PA4175 | plv   | protease IV                                                        | 177581854   | 594473749.3  | 0 | 0         | COG3987 F                                                                | 0                                                                               | 0                                  |                                    |
| PA4176 | pilC2 | peptidyl-prolyl cis-trans isomerase C2                             | 1939371840  | 2451707778   | 1 | 1         | COG0760 O                                                                | Parvulin-like peptidyl-prolyl isomerase                                         | K03769                             | CELLULAR PROCESSES AND SIGNALING   |
| PA4176 | pilC2 | peptidyl-prolyl cis-trans isomerase C2                             | 1939371840  | 2451707778   | 1 | 1         | COG0760 O                                                                | Parvulin-like peptidyl-prolyl isomerase                                         | K03770                             | CELLULAR PROCESSES AND SIGNALING   |
| PA4176 | pilC2 | peptidyl-prolyl cis-trans isomerase C2                             | 1939371840  | 2451707778   | 1 | 1         | COG0760 O                                                                | Parvulin-like peptidyl-prolyl isomerase                                         | K03770                             | CELLULAR PROCESSES AND SIGNALING   |
| PA4176 | pilC2 | peptidyl-prolyl cis-trans isomerase C2                             | 1939371840  | 2451707778   | 1 | 1         | COG0760 O                                                                | Parvulin-like peptidyl-prolyl isomerase                                         | K03770                             | CELLULAR PROCESSES AND SIGNALING   |
| PA4211 | phbB1 | probable phenazine biosynthesis protein                            | 0           | 618395794.6  | 1 | 1         | COG3451 R                                                                | Ketosteroid isomerase-related protein                                           | K06893                             | POORLY CHARACTERIZED               |
| PA4226 | pchE  | dihydroaeruginosic acid synthetase                                 | 39561476.32 | 0            | 0 | COG3433 Q | Aryl carrier domain                                                      | K12239                                                                          | METABOLISM                         |                                    |
| PA4226 | pchE  | dihydroaeruginosic acid synthetase                                 | 39561476.32 | 0            | 0 | COG3433 Q | Aryl carrier domain                                                      | K04788                                                                          | METABOLISM                         |                                    |
| PA4226 | pchE  | dihydroaeruginosic acid synthetase                                 | 39561476.32 | 0            | 0 | COG3433 Q | Aryl carrier domain                                                      | K04779                                                                          | METABOLISM                         |                                    |
| PA4226 | pchE  | dihydroaeruginosic acid synthetase                                 | 39561476.32 | 0            | 0 | COG3433 Q | Aryl carrier domain                                                      | K04784                                                                          | METABOLISM                         |                                    |
| PA4226 | pchE  | dihydroaeruginosic acid synthetase                                 | 39561476.32 | 0            | 0 | COG3433 Q | Aryl carrier domain                                                      | K01252                                                                          | METABOLISM                         |                                    |
| PA4230 | pchB  | salicylate biosynthesis protein PchB                               | 937393049.5 | 707534996.8  | 0 | 0         | COG1605 E                                                                | Chorismate mutase                                                               | K04516                             | METABOLISM                         |
| PA4230 | pchB  | salicylate biosynthesis protein PchB                               | 937393049.5 | 707534996.8  | 0 | 0         | COG1605 E                                                                | Chorismate mutase                                                               | K04093                             | METABOLISM                         |
| PA4230 | pchB  | salicylate biosynthesis protein PchB                               | 937393049.5 | 707534996.8  | 0 | 0         | COG1605 E                                                                | Chorismate mutase                                                               | K14176                             | METABOLISM                         |
| PA4230 | pchB  | salicylate biosynthesis protein PchB                               | 937393049.5 | 707534996.8  | 0 | 0         | COG1605 E                                                                | Chorismate mutase                                                               | K04093                             | METABOLISM                         |
| PA4230 | pchB  | salicylate biosynthesis protein PchB                               | 937393049.5 | 707534996.8  | 0 | 0         | COG1605 E                                                                | Chorismate mutase                                                               | K04093                             | METABOLISM                         |
| PA4230 | pchB  | salicylate biosynthesis protein PchB                               | 937393049.5 | 707534996.8  | 0 | 0         | COG1605 E                                                                | Chorismate mutase                                                               | K04093                             | METABOLISM                         |
| PA4230 | pchB  | salicylate biosynthesis protein PchB                               | 937393049.5 | 707534996.8  | 0 | 0         | COG1605 E                                                                | Chorismate mutase                                                               | K04093                             | METABOLISM                         |
| PA4232 | srb   | single-stranded DNA-binding protein                                | 223603395.6 | 380110491.4  | 1 | 1         | COG0629 L                                                                | Single-stranded DNA-binding protein                                             | K03111                             | INFORMATION STORAGE AND PROCESSING |
| PA4235 | fnaA  | bacterial ferritin                                                 | 2953723188  | 489920811    | 1 | 1         | COG2193 P                                                                | Bacterioferritin (cytochrome b1)                                                | K03594                             | METABOLISM                         |
| PA4236 | kata  | catalase                                                           | 2191166905  | 50093450.12  | 0 | 0         | COG0753 P                                                                | Catalase                                                                        | K04029                             | MET                                |

|        |                                                   |                           |             |                       |                                                                                 |                       |                                    |                                    |
|--------|---------------------------------------------------|---------------------------|-------------|-----------------------|---------------------------------------------------------------------------------|-----------------------|------------------------------------|------------------------------------|
| PA4308 | conserved hypothetical protein                    | 25461976.73               | 0           | O COG0433 R           | Predicted ATPase                                                                | G06915                | POORLY CHARACTERIZED               |                                    |
| PA4309 | chemotactic transducer PctA                       | 699699034.6               | 1021093088  | 1.45931852 COG8040 T  | Methyl-accepting chemotaxis protein                                             | K03406                | CELLULAR PROCESSES AND SIGNALING   |                                    |
| PA4310 | chemotactic transducer PctA                       | 699699034.6               | 1021093088  | 1.45931852 COG8040 N  | Methyl-accepting chemotaxis protein                                             | K03406                | CELLULAR PROCESSES AND SIGNALING   |                                    |
| PA4310 | chemotactic transducer PctB                       | 649591303.7               | 1021093088  | 1.571900797 COG8040 N | Methyl-accepting chemotaxis protein                                             | K03406                | CELLULAR PROCESSES AND SIGNALING   |                                    |
| PA4310 | chemotactic transducer PctB                       | 649591303.7               | 1021093088  | 1.571900797 COG8040 T | Methyl-accepting chemotaxis protein                                             | K03406                | CELLULAR PROCESSES AND SIGNALING   |                                    |
| PA4315 | mvaT                                              | 43663964437               | 39897073087 | 0.91423814            |                                                                                 |                       |                                    |                                    |
| PA4336 | conserved hypothetical protein                    | 89483061.6                | 128173882.4 | 3.669676095 COG6993 R | Putative intracellular protease/amidase                                         | K03152                | POORLY CHARACTERIZED               |                                    |
| PA4336 | conserved hypothetical protein                    | 89483061.6                | 128173882.4 | 3.669676095 COG6993 R | Putative intracellular protease/amidase                                         | K03152                | POORLY CHARACTERIZED               |                                    |
| PA4352 | conserved hypothetical protein                    | 84124609.1                | 242201104.1 | 0.28784671 COG589 T   | Universal stress protein UspA and related nucleotide-binding proteins           | K06149                | CELLULAR PROCESSES AND SIGNALING   |                                    |
| PA4356 | xenB                                              | 161771570                 | 333754569.2 | 2.06312252 COG1902 C  | "NADH:flavin oxidoreductases, Old Yellow Enzyme family"                         | K02019                | METABOLISM                         |                                    |
| PA4356 | xenB                                              | 161771570                 | 333754569.2 | 2.06312252 COG1902 C  | "NADH:flavin oxidoreductases, Old Yellow Enzyme family"                         | K02019                | METABOLISM                         |                                    |
| PA4356 | xenB                                              | 161771570                 | 333754569.2 | 2.06312252 COG1902 C  | "NADH:flavin oxidoreductases, Old Yellow Enzyme family"                         | K02019                | METABOLISM                         |                                    |
| PA4366 | sodB                                              | 1798839575                | 100229643.8 | 5.57E-02 COG6005 P    | Superoxide dismutase                                                            | K04564                | METABOLISM                         |                                    |
| PA4369 | hypothetical protein                              | 78336274.29               | 50162681.3  | 0.640350614 COG1704 S | Uncharacterized conserved protein                                               | K07374                | POORLY CHARACTERIZED               |                                    |
| PA4370 | icmP                                              | 6102896495                | 64698888037 | 1.060135135 COG3487 P | Uncharacterized iron-regulated protein                                          | K07321                | METABOLISM                         |                                    |
| PA4372 | hypothetical protein                              | 398580198.2               | 1405511475  | 2.52308923 COG4389 R  | Predicted periplasmic lipoprotein                                               | K07338                | POORLY CHARACTERIZED               |                                    |
| PA4386 | groEL                                             | 15550333261               | 17621035365 | 1.133547001 COG0459 O | Chaperonin GroEL (HSP60 family)                                                 | K04077                | CELLULAR PROCESSES AND SIGNALING   |                                    |
| PA4386 | groES                                             | 79909699305               | 66733051428 | 0.835105776 COG2324 O | Co-chaperonin GroES (HSP10)                                                     | K04078                | CELLULAR PROCESSES AND SIGNALING   |                                    |
| PA4387 | conserved hypothetical protein                    | 7612942.505               | 0           | O COG0330 R           | Protein affecting phase T7 exclusion by the F plasmid                           | K07113                | POORLY CHARACTERIZED               |                                    |
| PA4395 | conserved hypothetical protein                    | 2404375288                | 1446681298  | 0.16086982 COG1666 S  | Uncharacterized protein conserved in bacteria                                   | K07967                | POORLY CHARACTERIZED               |                                    |
| PA4403 | secA                                              | 64116613.97               | 14728055.3  | 2.27072479 COG4653 U  | "Protein translocase subunit SecA (ATPase, RNA helicase)"                       | K03070                | CELLULAR PROCESSES AND SIGNALING   |                                    |
| PA4406 | lpxC                                              | 625163800.9               | 96415330.46 | 0.154224109 COG0774 M | UDP-3-O-acyl-N-acetylglucosamine deacetylase                                    | K02535                | CELLULAR PROCESSES AND SIGNALING   |                                    |
| PA4407 | ftsZ                                              | 284532415.4               | 471897755.2 | 1.658502616 COG2026 D | Cell division GTPase                                                            | K03531                | CELLULAR PROCESSES AND SIGNALING   |                                    |
| PA4408 | ftsA                                              | 15083850.84               | 0           | O COG0849 D           | Actin-like ATPase involved in cell division                                     | K03590                | CELLULAR PROCESSES AND SIGNALING   |                                    |
| PA4423 | conserved hypothetical protein                    | 528354883.1               | 84521790.7  | 1.654728053 COG3107 R | Putative lipoprotein                                                            | K07121                | POORLY CHARACTERIZED               |                                    |
| PA4426 | conserved hypothetical protein                    | 28374642.02               | 0           | O COG8283 R           | Predicted periplasmic or secreted lipoprotein                                   | K04065                | POORLY CHARACTERIZED               |                                    |
| PA4429 | sspB                                              | 0                         | 87533767.1  | 1.000 COG2969 R       | Stringent starvation protein B                                                  | K03600                | POORLY CHARACTERIZED               |                                    |
| PA4429 | probable cytochrome c1 precursor                  | 2650919052                | 3984907981  | 1.503217527 COG2857 C | Cytochrome c1                                                                   | K04113                | METABOLISM                         |                                    |
| PA4429 | probable cytochrome c1 precursor                  | 2650919052                | 3984907981  | 1.503217527 COG2857 C | Cytochrome c1                                                                   | K04113                | METABOLISM                         |                                    |
| PA4431 | probable iron-sulfur protein                      | 2288020647                | 1798232299  | 0.785933598 COG0723 C | Rieske Fe-S protein                                                             | K02399                | METABOLISM                         |                                    |
| PA4431 | probable iron-sulfur protein                      | 2288020647                | 1798232299  | 0.785933598 COG0723 C | Rieske Fe-S protein                                                             | K02399                | METABOLISM                         |                                    |
| PA4431 | probable iron-sulfur protein                      | 2288020647                | 1798232299  | 0.785933598 COG0723 C | Rieske Fe-S protein                                                             | K02399                | METABOLISM                         |                                    |
| PA4433 | rplM                                              | 505 ribosomal protein L13 | 284392891.7 | 1410039285            | 4.986198061 COG0102 J                                                           | Ribosomal protein L13 | K02871                             | INFORMATION STORAGE AND PROCESSING |
| PA4441 | hypothetical protein                              | 5961188642                | 6402636059  | 1.07405393 COG3105 S  | Uncharacterized protein conserved in bacteria                                   | K09908                | POORLY CHARACTERIZED               |                                    |
| PA4453 | conserved hypothetical protein                    | 85425502.18               | 0           | O COG1854 T           | "ABC-type transport system involved in resistance to organic solvents, auxilia" | K07321                | POORLY CHARACTERIZED               |                                    |
| PA4457 | arabinose-5-phosphate isomerase KdsD              | 17914799.95               | 0           | O COG5617 R           | FOG: CBS domain                                                                 | K06041                | POORLY CHARACTERIZED               |                                    |
| PA4457 | arabinose-5-phosphate isomerase KdsD              | 17914799.95               | 0           | O COG5617 R           | Predicted sugar phosphate isomerase involved in capsule formation               | K02467                | CELLULAR PROCESSES AND SIGNALING   |                                    |
| PA4457 | arabinose-5-phosphate isomerase KdsD              | 17914799.95               | 0           | O COG5617 R           | FOG: CBS domain                                                                 | K09888                | POORLY CHARACTERIZED               |                                    |
| PA4457 | arabinose-5-phosphate isomerase KdsD              | 17914799.95               | 0           | O COG5617 R           | Predicted sugar phosphate isomerase involved in capsule formation               | K06041                | POORLY CHARACTERIZED               |                                    |
| PA4457 | arabinose-5-phosphate isomerase KdsD              | 17914799.95               | 0           | O COG5617 R           | Predicted sugar phosphate isomerase involved in capsule formation               | K09888                | POORLY CHARACTERIZED               |                                    |
| PA4459 | lptC                                              | 601604521.9               | 929746169.1 | 1.545444117 COG3117 S | Uncharacterized protein conserved in bacteria                                   | K01719                | POORLY CHARACTERIZED               |                                    |
| PA4460 | lptH                                              | 55678390.9                | 131688183.1 | 0.236545486 COG1934 S | Uncharacterized protein conserved in bacteria                                   | K09774                | POORLY CHARACTERIZED               |                                    |
| PA4463 | conserved hypothetical protein                    | 31825250.82               | 38929156.05 | 1.223216001 COG1544 J | Ribosome-associated protein (Y Psp-r1)                                          | K05808                | INFORMATION STORAGE AND PROCESSING |                                    |
| PA4463 | conserved hypothetical protein                    | 31825250.82               | 38929156.05 | 1.223216001 COG1544 J | Ribosome-associated protein (Y Psp-r1)                                          | K05808                | INFORMATION STORAGE AND PROCESSING |                                    |
| PA4464 | ptsN                                              | 283991397.9               | 86680029.31 | 0.305220616 COG1762 T | Phosphotransferase system mannitol/fructose-specific IIA domain (Ntr-type)      | K02770                | CELLULAR PROCESSES AND SIGNALING   |                                    |
| PA4464 | ptsN                                              | 283991397.9               | 86680029.31 | 0.305220616 COG1762 T | Phosphotransferase system mannitol/fructose-specific IIA domain (Ntr-type)      | K02770                | CELLULAR PROCESSES AND SIGNALING   |                                    |
| PA4464 | ptsN                                              | 283991397.9               | 86680029.31 | 0.305220616 COG1762 T | Phosphotransferase system mannitol/fructose-specific IIA domain (Ntr-type)      | K02770                | CELLULAR PROCESSES AND SIGNALING   |                                    |
| PA4464 | ptsN                                              | 283991397.9               | 86680029.31 | 0.305220616 COG1762 T | Phosphotransferase system mannitol/fructose-specific IIA domain (Ntr-type)      | K02770                | CELLULAR PROCESSES AND SIGNALING   |                                    |
| PA4464 | ptsN                                              | 283991397.9               | 86680029.31 | 0.305220616 COG1762 T | Phosphotransferase system mannitol/fructose-specific IIA domain (Ntr-type)      | K02770                | CELLULAR PROCESSES AND SIGNALING   |                                    |
| PA4464 | ptsN                                              | 283991397.9               | 86680029.31 | 0.305220616 COG1762 T | Phosphotransferase system mannitol/fructose-specific IIA domain (Ntr-type)      | K02770                | CELLULAR PROCESSES AND SIGNALING   |                                    |
| PA4464 | ptsN                                              | 283991397.9               | 86680029.31 | 0.305220616 COG1762 T | Phosphotransferase system mannitol/fructose-specific IIA domain (Ntr-type)      | K02770                | CELLULAR PROCESSES AND SIGNALING   |                                    |
| PA4464 | ptsN                                              | 283991397.9               | 86680029.31 | 0.305220616 COG1762 T | Phosphotransferase system mannitol/fructose-specific IIA domain (Ntr-type)      | K02770                | CELLULAR PROCESSES AND SIGNALING   |                                    |
| PA4464 | ptsN                                              | 283991397.9               | 86680029.31 | 0.305220616 COG1762 T | Phosphotransferase system mannitol/fructose-specific IIA domain (Ntr-type)      | K02770                | CELLULAR PROCESSES AND SIGNALING   |                                    |
| PA4464 | ptsN                                              | 283991397.9               | 86680029.31 | 0.305220616 COG1762 T | Phosphotransferase system mannitol/fructose-specific IIA domain (Ntr-type)      | K02770                | CELLULAR PROCESSES AND SIGNALING   |                                    |
| PA4464 | ptsN                                              | 283991397.9               | 86680029.31 | 0.305220616 COG1762 T | Phosphotransferase system mannitol/fructose-specific IIA domain (Ntr-type)      | K02770                | CELLULAR PROCESSES AND SIGNALING   |                                    |
| PA4464 | ptsN                                              | 283991397.9               | 86680029.31 | 0.305220616 COG1762 T | Phosphotransferase system mannitol/fructose-specific IIA domain (Ntr-type)      | K02770                | CELLULAR PROCESSES AND SIGNALING   |                                    |
| PA4468 | sodM                                              | 25043746.99               | 48049067.49 | 0.254423695 COG6005 P | Superoxide dismutase                                                            | K02768                | METABOLISM                         |                                    |
| PA4470 | funC1                                             | 563408312                 | 66402097.9  | 1.179610034 COG114 C  | Fumarate                                                                        | K01679                | METABOLISM                         |                                    |
| PA4473 | hypothetical protein                              | 1657209293                | 199507263.1 | 0.120387488 COG3028 S | Uncharacterized protein conserved in bacteria                                   | K09889                | POORLY CHARACTERIZED               |                                    |
| PA4473 | hypothetical protein                              | 1657209293                | 199507263.1 | 0.120387488 COG3028 S | Uncharacterized protein conserved in bacteria                                   | K09889                | POORLY CHARACTERIZED               |                                    |
| PA4473 | hypothetical protein                              | 1657209293                | 199507263.1 | 0.120387488 COG3028 S | Uncharacterized protein conserved in bacteria                                   | K09889                | POORLY CHARACTERIZED               |                                    |
| PA4473 | hypothetical protein                              | 1657209293                | 199507263.1 | 0.120387488 COG3028 S | Uncharacterized protein conserved in bacteria                                   | K09889                | POORLY CHARACTERIZED               |                                    |
| PA4481 | mreB                                              | 45536000.06               | 0           | O COG1077 D           | Actin-like ATPase involved in cell morphogenesis                                | K03569                | CELLULAR PROCESSES AND SIGNALING   |                                    |
| PA4482 | gatC                                              | 2951101781                | 4720799996  | 1.599660167 COG0721 J | Asp-tRNAAsp/Glu-tRNAAsp amidotransferase C subunit                              | K02435                | INFORMATION STORAGE AND PROCESSING |                                    |
| PA4484 | gatB                                              | 51180970.91               | 45517996.2  | 0.889353511 COG0064 J | Asp-tRNAAsp/Glu-tRNAAsp amidotransferase B subunit (PET112 homologue)           | K02434                | INFORMATION STORAGE AND PROCESSING |                                    |
| PA4487 | magJ                                              | 259733846.2               | 0           | O                     |                                                                                 |                       |                                    |                                    |
| PA4495 | hypothetical protein                              | 2982099282                | 1427480724  | 0.478668184           |                                                                                 |                       |                                    |                                    |
| PA4520 | probable chemotaxis transducer                    | 410781354.9               | 899531154.1 | 2.189805217 COG8040 N | Methyl-accepting chemotaxis protein                                             | K03406                | CELLULAR PROCESSES AND SIGNALING   |                                    |
| PA4520 | probable chemotaxis transducer                    | 410781354.9               | 899531154.1 | 2.189805217 COG8040 N | Methyl-accepting chemotaxis protein                                             | K03406                | CELLULAR PROCESSES AND SIGNALING   |                                    |
| PA4525 | pilA                                              | 512468476.5               | 11134536129 | 21.72726058 COG4969 U | "Tlp plus assembly protein, major pilin P1A"                                    | K02655                | CELLULAR PROCESSES AND SIGNALING   |                                    |
| PA4525 | pilA                                              | 512468476.5               | 11134536129 | 21.72726058 COG4969 U | "Tlp plus assembly protein, major pilin P1A"                                    | K02655                | CELLULAR PROCESSES AND SIGNALING   |                                    |
| PA4525 | pilA                                              | 512468476.5               | 11134536129 | 21.72726058 COG4969 U | "Tlp plus assembly protein, major pilin P1A"                                    | K02655                | CELLULAR PROCESSES AND SIGNALING   |                                    |
| PA4525 | pilA                                              | 512468476.5               | 11134536129 | 21.72726058 COG4969 U | "Tlp plus assembly protein, major pilin P1A"                                    | K02655                | CELLULAR PROCESSES AND SIGNALING   |                                    |
| PA4525 | pilA                                              | 512468476.5               | 11134536129 | 21.72726058 COG4969 U | "Tlp plus assembly protein, major pilin P1A"                                    | K02655                | CELLULAR PROCESSES AND SIGNALING   |                                    |
| PA4525 | pilA                                              | 512468476.5               | 11134536129 | 21.72726058 COG4969 U | "Tlp plus assembly protein, major pilin P1A"                                    | K02655                | CELLULAR PROCESSES AND SIGNALING   |                                    |
| PA4529 | coeE                                              | 73500700.85               | 0           | O COG0237 H           | Phospho-Gal kinase                                                              | K03953                | METABOLISM                         |                                    |
| PA4542 | clpB                                              | 24026042.7                | 183949944.2 | 0.76637494 COG5642 O  | "ATPases with chaperone activity, ATP-binding subunit"                          | K03694                | CELLULAR PROCESSES AND SIGNALING   |                                    |
| PA4542 | clpB                                              | 24026042.7                | 183949944.2 | 0.76637494 COG5642 O  | "ATPases with chaperone activity, ATP-binding subunit"                          | K03696                | CELLULAR PROCESSES AND SIGNALING   |                                    |
| PA4542 | clpB                                              | 24026042.7                | 183949944.2 | 0.76637494 COG5642 O  | "ATPases with chaperone activity, ATP-binding subunit"                          | K03696                | CELLULAR PROCESSES AND SIGNALING   |                                    |
| PA4542 | clpB                                              | 24026042.7                | 183949944.2 | 0.76637494 COG5642 O  | "ATPases with chaperone activity, ATP-binding subunit"                          | K03696                | CELLULAR PROCESSES AND SIGNALING   |                                    |
| PA4550 | fimU                                              | 946891595.1               | 0           | O COG4970 U           | Tlp plus assembly protein FimT                                                  | K03695                | CELLULAR PROCESSES AND SIGNALING   |                                    |
| PA4550 | fimU                                              | 946891595.1               | 0           | O COG4970 U           | Tlp plus assembly protein FimT                                                  | K03695                | CELLULAR PROCESSES AND SIGNALING   |                                    |
| PA4550 | fimU                                              | 946891595.1               | 0           | O COG4970 U           | Tlp plus assembly protein FimT                                                  | K03695                | CELLULAR PROCESSES AND SIGNALING   |                                    |
| PA4550 | fimU                                              | 946891595.1               | 0           | O COG4970 U           | Tlp plus assembly protein FimT                                                  | K03695                | CELLULAR PROCESSES AND SIGNALING   |                                    |
| PA4550 | fimU                                              | 946891595.1               | 0           | O COG4970 U           | Tlp plus assembly protein FimT                                                  | K03695                | CELLULAR PROCESSES AND SIGNALING   |                                    |
| PA4550 | fimU                                              | 946891595.1               | 0           | O COG4970 U           | Tlp plus assembly protein FimT                                                  | K03695                | CELLULAR PROCESSES AND SIGNALING   |                                    |
| PA4553 | piX                                               | 23065481.05               | 0           | O COG4726 N           | Tlp plus assembly protein PiX                                                   | K02673                | CELLULAR PROCESSES AND SIGNALING   |                                    |
| PA4553 | piX                                               | 23065481.05               | 0           | O COG4726 N           | Tlp plus assembly protein PiX                                                   | K02673                | CELLULAR PROCESSES AND SIGNALING   |                                    |
| PA4557 | lytB                                              | 18416624.4                | 0           | O COG0761 M           | Penicillin tolerance protein                                                    | K03527                | METABOLISM                         |                                    |
| PA4557 | lytB                                              | 18416624.4                | 0           | O COG0761 M           | Penicillin tolerance protein                                                    | K03527                | CELLULAR PROCESSES AND SIGNALING   |                                    |
| PA4558 | "probable peptidyl-prolyl cis-trans isomerase     | 813887707.4               | 674300010.3 | 0.828492683 COG1047 O | FKBP-type peptidyl-prolyl cis-trans isomerases 2                                | K01802                | CELLULAR PROCESSES AND SIGNALING   |                                    |
| PA4558 | "probable peptidyl-prolyl cis-trans isomerase     | 813887707.4               | 674300010.3 | 0.828492683 COG1047 O | FKBP-type peptidyl-prolyl cis-trans isomerases 2                                | K01802                | CELLULAR PROCESSES AND SIGNALING   |                                    |
| PA4558 | "probable peptidyl-prolyl cis-trans isomerase     | 813887707.4               | 674300010.3 | 0.828492683 COG1047 O | FKBP-type peptidyl-prolyl cis-trans isomerases 2                                | K01802                | CELLULAR PROCESSES AND SIGNALING   |                                    |
| PA4563 | rplT                                              | 255478979                 | 865178521.9 | 0.3386484 COG2068 H   | Ribosomal protein L23                                                           | K03775                | CELLULAR PROCESSES AND SIGNALING   |                                    |
| PA4572 | kfIB                                              | 968295769.9               | 730326688   | 0.754239263 COG0545 O | FKBP-type peptidyl-prolyl cis-trans isomerases 1                                | K03773                | CELLULAR PROCESSES AND SIGNALING   |                                    |
| PA4572 | kfIB                                              | 968295769.9               | 730326688   | 0.754239263 COG0545 O | FKBP-type peptidyl-prolyl cis-trans isomerases 1                                | K03773                | CELLULAR PROCESSES AND SIGNALING   |                                    |
| PA4572 | kfIB                                              | 968295769.9               | 730326688   | 0.754239263 COG0545 O | FKBP-type peptidyl-prolyl cis-trans isomerases 1                                | K03773                | CELLULAR PROCESSES AND SIGNALING   |                                    |
| PA4572 | kfIB                                              | 968295769.9               | 730326688   | 0.754239263 COG0545 O | FKBP-type peptidyl-prolyl cis-trans isomerases 1                                | K03773                | CELLULAR PROCESSES AND SIGNALING   |                                    |
| PA4577 | hypothetical protein                              | 114540300                 | 67457371.6  | 0.588942338 COG1734 T | Dnak suppressor protein                                                         | K05204                | CELLULAR PROCESSES AND SIGNALING   |                                    |
| PA4587 | ccpR                                              | 207967256.1               | 0           | O COG1858 P           | Cytochrome c peroxidase                                                         | K04028                | METABOLISM                         |                                    |
| PA4595 | probable ATP-binding component of ABC transporter | 22562802.72               | 2817651594  | 124.8804068 COG0488 R | ATPase components of ABC transporters with duplicated ATPase domains            | K06158                | POORLY CHARACTERIZED               |                                    |
| PA4611 | hypothetical protein                              | 10118623624               | 10666914037 | 0.996791953 COG2841 S | Uncharacterized protein conserved in bacteria                                   | K09794                | POORLY CHARACTERIZED               |                                    |
| PA4626 | hprA                                              | 9012347.064               | 0           | O COG1052 H           | Lactate dehydrogenase and related dehydrogenases                                | K03090                | POORLY CHARACTERIZED               |                                    |
| PA4626 | hprA                                              | 9012347.064               | 0           | O COG1052 H           | Lactate dehydrogenase and related dehydrogenases                                | K03090                | POORLY CHARACTERIZED               |                                    |
| PA4626 | hprA                                              | 9012347.064               | 0           | O COG1052 H           | Lactate dehydrogenase and related dehydrogenases                                | K03090                | POORLY CHARACTERIZED               |                                    |
| PA4626 | hprA                                              | 9012347.064               | 0           | O COG1052 H           | Lactate dehydrogenase and related dehydrogenases                                | K03090                | POORLY CHARACTERIZED               |                                    |
| PA4626 | hprA                                              | 9012347.064               | 0           | O COG1052 H           | Lactate dehydrogenase and related dehydrogenases                                | K03090                | POORLY CHARACTERIZED               |                                    |
| PA4626 | hprA                                              | 9012347.064               | 0           | O COG1052 H           | Lactate dehydrogenase and related dehydrogenases                                | K03090                | POORLY CHARACTERIZED               |                                    |
| PA4626 | hprA                                              | 9012347.064               | 0           | O COG1052 H           | Lactate dehydrogenase and related dehydrogenases                                | K03090                | POORLY CHARACTERIZED               |                                    |
| PA4626 | hprA                                              | 9012347.064               | 0           | O COG1052 H           | Lactate dehydrogenase and related dehydrogenases                                | K03090                | POORLY CHARACTERIZED               |                                    |
| PA4626 | hprA                                              | 9012347.064               | 0           | O COG1052 H           | Lactate dehydrogenase and related dehydrogenases                                | K03090                | POORLY CHARACTERIZED               |                                    |
| PA4632 | hypothetical protein                              | 349696416.9               | 911284965.1 | 2.605936038 COG0501 O | Zn-dependent protease with chaperone function                                   | K03799                | CELLULAR PROCESSES AND SIGNALING   |                                    |
| PA4632 | hypothetical protein                              | 349696416.9               | 911284965.1 | 2.605936038 COG0501 O | Zn-dependent protease with chaperone                                            |                       |                                    |                                    |

|                                           |             |             |             |         |   |                                                                  |        |                                    |
|-------------------------------------------|-------------|-------------|-------------|---------|---|------------------------------------------------------------------|--------|------------------------------------|
| carbamoyl-phosphate synthase small chain  | 181327695.4 | 0           | 0           | COG0505 | E | Carbamoyl-phosphate synthase small subunit                       | K01596 | METABOLISM                         |
| carbamoyl-phosphate synthase small chain  | 181327695.4 | 0           | 0           | COG0505 | F | Carbamoyl-phosphate synthase small subunit                       | K01596 | METABOLISM                         |
| DnaJ protein                              | 10970268.37 | 0           | 0           | COG0484 | 0 | Dna-class molecular chaperone with C-terminal Zn finger domain   | K3686  | CELLULAR PROCESSES AND SIGNALING   |
| DnaK protein                              | 1259905581  | 1242536310  | 0.98621385  | COG0443 | 0 | Molecular chaperone                                              | K04046 | CELLULAR PROCESSES AND SIGNALING   |
| DnaK protein                              | 1259905581  | 1242536310  | 0.98621385  | COG0443 | 0 | Molecular chaperone                                              | K04046 | CELLULAR PROCESSES AND SIGNALING   |
| DnaK protein                              | 1259905581  | 1242536310  | 0.98621385  | COG0443 | 0 | Molecular chaperone                                              | K04043 | CELLULAR PROCESSES AND SIGNALING   |
| DnaK protein                              | 1259905581  | 1242536310  | 0.98621385  | COG0443 | 0 | Molecular chaperone                                              | K02383 | CELLULAR PROCESSES AND SIGNALING   |
| heat shock protein GrpE                   | 19827047127 | 11218072546 | 0.56448862  | COG0576 | 0 | Molecular chaperone GrpE (heat shock protein)                    | K3687  | CELLULAR PROCESSES AND SIGNALING   |
| ferric uptake regulation protein          | 1529074.563 | 4900917.879 | 3.205152972 | COG0735 | P | Fe <sup>2+</sup> uptake regulation proteins                      | K09825 | METABOLISM                         |
| ferric uptake regulation protein          | 1529074.563 | 4900917.879 | 3.205152972 | COG0735 | P | Fe <sup>2+</sup> uptake regulation proteins                      | K09823 | METABOLISM                         |
| ferric uptake regulation protein          | 1529074.563 | 4900917.879 | 3.205152972 | COG0735 | P | Fe <sup>2+</sup> uptake regulation proteins                      | K03711 | METABOLISM                         |
| Outer membrane lipoprotein OmlA precursor | 291153987.8 | 57419309.3  | 1.962601693 | COG2913 | J | Small protein A (tmRNA-binding)                                  | K06186 | INFORMATION STORAGE AND PROCESSING |
| CueE                                      | 458879482.5 | 315527399.2 | 0.683245619 |         |   |                                                                  |        |                                    |
| thiol-disulfide interchange protein DtpZ  | 45381854.4  | 5359553.75  | 1.180908027 | COG4232 | C | Thiol-disulfide interchange protein                              | K04084 | METABOLISM                         |
| thiol-disulfide interchange protein DtpZ  | 45381854.4  | 5359553.75  | 1.180908027 | COG4232 | 0 | Thiol-disulfide interchange protein                              | K04084 | CELLULAR PROCESSES AND SIGNALING   |
| biotin carboxyl carrier protein (BCCP)    | 25822885.9  | 50776266.2  | 1.966212814 | COG0511 | I | Biotin carboxyl carrier protein                                  | K05171 | METABOLISM                         |
| biotin carboxyl carrier protein (BCCP)    | 25822885.9  | 50776266.2  | 1.966212814 | COG0511 | I | Biotin carboxyl carrier protein                                  | K02160 | METABOLISM                         |
| biotin carboxyl carrier protein (BCCP)    | 25822885.9  | 50776266.2  | 1.966212814 | COG0511 | I | Biotin carboxyl carrier protein                                  | K01960 | METABOLISM                         |
| hypothetical protein                      | 807171526.2 | 3842990.2   | 0.98286437  |         |   |                                                                  |        |                                    |
| DNA-binding protein Fis                   | 807798754.2 | 69681888.8  | 0.86243928  | COG2901 | L | "Factor for invasion stimulation Fis, transcriptional activator" | K03557 | INFORMATION STORAGE AND PROCESSING |
| DNA-binding protein Fis                   | 807798754.2 | 69681888.8  | 0.86243928  | COG2901 | K | "Factor for invasion stimulation Fis, transcriptional activator" | K03557 | INFORMATION STORAGE AND PROCESSING |
| DNA-binding protein Fis                   | 807798754.2 | 69681888.8  | 0.86243928  | COG2901 | L | "Factor for invasion stimulation Fis, transcriptional activator" | K03557 | INFORMATION STORAGE AND PROCESSING |
| DNA-binding protein Fis                   | 807798754.2 | 69681888.8  | 0.86243928  | COG2901 | L | "Factor for invasion stimulation Fis, transcriptional activator" | K03557 | INFORMATION STORAGE AND PROCESSING |
| DNA-binding protein Fis                   | 807798754.2 | 69681888.8  | 0.86243928  | COG2901 | L | "Factor for invasion stimulation Fis, transcriptional activator" | K03557 | INFORMATION STORAGE AND PROCESSING |
| DNA-binding protein Fis                   | 807798754.2 | 69681888.8  | 0.86243928  | COG2901 | L | "Factor for invasion stimulation Fis, transcriptional activator" | K03557 | INFORMATION STORAGE AND PROCESSING |
| DNA-binding protein Fis                   | 807798754.2 | 69681888.8  | 0.86243928  | COG2901 | L | "Factor for invasion stimulation Fis, transcriptional activator" | K03557 | INFORMATION STORAGE AND PROCESSING |
| DNA-binding protein Fis                   | 807798754.2 | 69681888.8  | 0.86243928  | COG2901 | L | "Factor for invasion stimulation Fis, transcriptional activator" | K03557 | INFORMATION STORAGE AND PROCESSING |
| DNA-binding protein Fis                   | 807798754.2 | 69681888.8  | 0.86243928  | COG2901 | L | "Factor for invasion stimulation Fis, transcriptional activator" | K03557 | INFORMATION STORAGE AND PROCESSING |
| DNA-binding protein Fis                   | 807798754.2 | 69681888.8  | 0.86243928  | COG2901 | L | "Factor for invasion stimulation Fis, transcriptional activator" | K03557 | INFORMATION STORAGE AND PROCESSING |
| DNA-binding protein Fis                   | 807798754.2 | 69681888.8  | 0.86243928  | COG2901 | L | "Factor for invasion stimulation Fis, transcriptional activator" | K03557 | INFORMATION STORAGE AND PROCESSING |
| DNA-binding protein Fis                   | 807798754.2 | 69681888.8  | 0.86243928  | COG2901 | L | "Factor for invasion stimulation Fis, transcriptional activator" | K03557 | INFORMATION STORAGE AND PROCESSING |
| DNA-binding protein Fis                   | 807798754.2 | 69681888.8  | 0.86243928  | COG2901 | L | "Factor for invasion stimulation Fis, transcriptional activator" | K03557 | INFORMATION STORAGE AND PROCESSING |
| DNA-binding protein Fis                   | 807798754.2 | 69681888.8  | 0.86243928  | COG2901 | L | "Factor for invasion stimulation Fis, transcriptional activator" | K03557 | INFORMATION STORAGE AND PROCESSING |
| DNA-binding protein Fis                   | 807798754.2 | 69681888.8  | 0.86243928  | COG2901 | L | "Factor for invasion stimulation Fis, transcriptional activator" | K03557 | INFORMATION STORAGE AND PROCESSING |
| DNA-binding protein Fis                   | 807798754.2 | 69681888.8  | 0.86243928  | COG2901 | L | "Factor for invasion stimulation Fis, transcriptional activator" | K03557 | INFORMATION STORAGE AND PROCESSING |
| DNA-binding protein Fis                   | 807798754.2 | 69681888.8  | 0.86243928  | COG2901 | L | "Factor for invasion stimulation Fis, transcriptional activator" | K03557 | INFORMATION STORAGE AND PROCESSING |
| DNA-binding protein Fis                   | 807798754.2 | 69681888.8  | 0.86243928  | COG2901 | L | "Factor for invasion stimulation Fis, transcriptional activator" | K03557 | INFORMATION STORAGE AND PROCESSING |
| DNA-binding protein Fis                   | 807798754.2 | 69681888.8  | 0.86243928  | COG2901 | L | "Factor for invasion stimulation Fis, transcriptional activator" | K03557 | INFORMATION STORAGE AND PROCESSING |
| DNA-binding protein Fis                   | 807798754.2 | 69681888.8  | 0.86243928  | COG2901 | L | "Factor for invasion stimulation Fis, transcriptional activator" | K03557 | INFORMATION STORAGE AND PROCESSING |
| DNA-binding protein Fis                   | 807798754.2 | 69681888.8  | 0.86243928  | COG2901 | L | "Factor for invasion stimulation Fis, transcriptional activator" | K03557 | INFORMATION STORAGE AND PROCESSING |
| DNA-binding protein Fis                   | 807798754.2 | 69681888.8  | 0.86243928  | COG2901 | L | "Factor for invasion stimulation Fis, transcriptional activator" | K03557 | INFORMATION STORAGE AND PROCESSING |
| DNA-binding protein Fis                   | 807798754.2 | 69681888.8  | 0.86243928  | COG2901 | L | "Factor for invasion stimulation Fis, transcriptional activator" | K03557 | INFORMATION STORAGE AND PROCESSING |
| DNA-binding protein Fis                   | 807798754.2 | 69681888.8  | 0.86243928  | COG2901 | L | "Factor for invasion stimulation Fis, transcriptional activator" | K03557 | INFORMATION STORAGE AND PROCESSING |
| DNA-binding protein Fis                   | 807798754.2 | 69681888.8  | 0.86243928  | COG2901 | L | "Factor for invasion stimulation Fis, transcriptional activator" | K03557 | INFORMATION STORAGE AND PROCESSING |
| DNA-binding protein Fis                   | 807798754.2 | 69681888.8  | 0.86243928  | COG2901 | L | "Factor for invasion stimulation Fis, transcriptional activator" | K03557 | INFORMATION STORAGE AND PROCESSING |
| DNA-binding protein Fis                   | 807798754.2 | 69681888.8  | 0.86243928  | COG2901 | L | "Factor for invasion stimulation Fis, transcriptional activator" | K03557 | INFORMATION STORAGE AND PROCESSING |
| DNA-binding protein Fis                   | 807798754.2 | 69681888.8  | 0.86243928  | COG2901 | L | "Factor for invasion stimulation Fis, transcriptional activator" | K03557 | INFORMATION STORAGE AND PROCESSING |
| DNA-binding protein Fis                   | 807798754.2 | 69681888.8  | 0.86243928  | COG2901 | L | "Factor for invasion stimulation Fis, transcriptional activator" | K03557 | INFORMATION STORAGE AND PROCESSING |
| DNA-binding protein Fis                   | 807798754.2 | 69681888.8  | 0.86243928  | COG2901 | L | "Factor for invasion stimulation Fis, transcriptional activator" | K03557 | INFORMATION STORAGE AND PROCESSING |
| DNA-binding protein Fis                   | 807798754.2 | 69681888.8  | 0.86243928  | COG2901 | L | "Factor for invasion stimulation Fis, transcriptional activator" | K03557 | INFORMATION STORAGE AND PROCESSING |
| DNA-binding protein Fis                   | 807798754.2 | 69681888.8  | 0.86243928  | COG2901 | L | "Factor for invasion stimulation Fis, transcriptional activator" | K03557 | INFORMATION STORAGE AND PROCESSING |
| DNA-binding protein Fis                   | 807798754.2 | 69681888.8  | 0.86243928  | COG2901 | L | "Factor for invasion stimulation Fis, transcriptional activator" | K03557 | INFORMATION STORAGE AND PROCESSING |
| DNA-binding protein Fis                   | 807798754.2 | 69681888.8  | 0.86243928  | COG2901 | L | "Factor for invasion stimulation Fis, transcriptional activator" | K03557 | INFORMATION STORAGE AND PROCESSING |
| DNA-binding protein Fis                   | 807798754.2 | 69681888.8  | 0.86243928  | COG2901 | L | "Factor for invasion stimulation Fis, transcriptional activator" | K03557 | INFORMATION STORAGE AND PROCESSING |
| DNA-binding protein Fis                   | 807798754.2 | 69681888.8  | 0.86243928  | COG2901 | L | "Factor for invasion stimulation Fis, transcriptional activator" | K03557 | INFORMATION STORAGE AND PROCESSING |
| DNA-binding protein Fis                   | 807798754.2 | 69681888.8  | 0.86243928  | COG2901 | L | "Factor for invasion stimulation Fis, transcriptional activator" | K03557 | INFORMATION STORAGE AND PROCESSING |
| DNA-binding protein Fis                   | 807798754.2 | 69681888.8  | 0.86243928  | COG2901 | L | "Factor for invasion stimulation Fis, transcriptional activator" | K03557 | INFORMATION STORAGE AND PROCESSING |
| DNA-binding protein Fis                   | 807798754.2 | 69681888.8  | 0.86243928  | COG2901 | L | "Factor for invasion stimulation Fis, transcriptional activator" | K03557 | INFORMATION STORAGE AND PROCESSING |
| DNA-binding protein Fis                   | 807798754.2 | 69681888.8  | 0.86243928  | COG2901 | L | "Factor for invasion stimulation Fis, transcriptional activator" | K03557 | INFORMATION STORAGE AND PROCESSING |
| DNA-binding protein Fis                   | 807798754.2 | 69681888.8  | 0.86243928  | COG2901 | L | "Factor for invasion stimulation Fis, transcriptional activator" | K03557 | INFORMATION STORAGE AND PROCESSING |
| DNA-binding protein Fis                   | 807798754.2 | 69681888.8  | 0.86243928  | COG2901 | L | "Factor for invasion stimulation Fis, transcriptional activator" | K03557 | INFORMATION STORAGE AND PROCESSING |
| DNA-binding protein Fis                   | 807798754.2 | 69681888.8  | 0.86243928  | COG2901 | L | "Factor for invasion stimulation Fis, transcriptional activator" | K03557 | INFORMATION STORAGE AND PROCESSING |
| DNA-binding protein Fis                   | 807798754.2 | 69681888.8  | 0.86243928  | COG2901 | L | "Factor for invasion stimulation Fis, transcriptional activator" | K03557 | INFORMATION STORAGE AND PROCESSING |
| DNA-binding protein Fis                   | 807798754.2 | 69681888.8  | 0.86243928  | COG2901 | L | "Factor for invasion stimulation Fis, transcriptional activator" | K03557 | INFORMATION STORAGE AND PROCESSING |
| DNA-binding protein Fis                   | 807798754.2 | 69681888.8  | 0.86243928  | COG2901 | L | "Factor for invasion stimulation Fis, transcriptional activator" | K03557 | INFORMATION STORAGE AND PROCESSING |
| DNA-binding protein Fis                   | 807798754.2 | 69681888.8  | 0.86243928  | COG2901 | L | "Factor for invasion stimulation Fis, transcriptional activator" | K03557 | INFORMATION STORAGE AND PROCESSING |
| DNA-binding protein Fis                   | 807798754.2 | 69681888.8  | 0.86243928  | COG2901 | L | "Factor for invasion stimulation Fis, transcriptional activator" | K03557 | INFORMATION STORAGE AND PROCESSING |
| DNA-binding protein Fis                   | 807798754.2 | 69681888.8  | 0.86243928  | COG2901 | L | "Factor for invasion stimulation Fis, transcriptional activator" | K03557 | INFORMATION STORAGE AND PROCESSING |
| DNA-binding protein Fis                   | 807798754.2 | 69681888.8  | 0.86243928  | COG2901 | L | "Factor for invasion stimulation Fis, transcriptional activator" | K03557 | INFORMATION STORAGE AND PROCESSING |
| DNA-binding protein Fis                   | 807798754.2 | 69681888.8  | 0.86243928  | COG2901 | L | "Factor for invasion stimulation Fis, transcriptional activator" | K03557 | INFORMATION STORAGE AND PROCESSING |
| DNA-binding protein Fis                   | 807798754.2 | 69681888.8  | 0.86243928  | COG2901 | L | "Factor for invasion stimulation Fis, transcriptional activator" | K03557 | INFORMATION STORAGE AND PROCESSING |
| DNA-binding protein Fis                   | 807798754.2 | 69681888.8  | 0.86243928  | COG2901 | L | "Factor for invasion stimulation Fis, transcriptional activator" | K03557 | INFORMATION STORAGE AND PROCESSING |
| DNA-binding protein Fis                   | 807798754.2 | 69681888.8  | 0.86243928  | COG2901 | L | "Factor for invasion stimulation Fis, transcriptional activator" | K03557 | INFORMATION STORAGE AND PROCESSING |
| DNA-binding protein Fis                   | 807798754.2 | 69681888.8  | 0.86243928  | COG2901 | L | "Factor for invasion stimulation Fis, transcriptional activator" | K03557 | INFORMATION STORAGE AND PROCESSING |
| DNA-binding protein Fis                   | 807798754.2 | 69681888.8  | 0.86243928  | COG2901 | L | "Factor for invasion stimulation Fis, transcriptional activator" | K03557 | INFORMATION STORAGE AND PROCESSING |
| DNA-binding protein Fis                   | 807798754.2 | 69681888.8  | 0.86243928  | COG2901 | L | "Factor for invasion stimulation Fis, transcriptional activator" | K03557 | INFORMATION STORAGE AND PROCESSING |
| DNA-binding protein Fis                   | 807798754.2 | 69681888.8  | 0.86243928  | COG2901 | L | "Factor for invasion stimulation Fis, transcriptional activator" | K03557 | INFORMATION STORAGE AND PROCESSING |
| DNA-binding protein Fis                   | 807798754.2 | 69681888.8  | 0.86243928  | COG2901 | L | "Factor for invasion stimulation Fis, transcriptional activator" | K03557 | INFORMATION STORAGE AND PROCESSING |
| DNA-binding protein Fis                   | 807798754.2 | 69681888.8  | 0.86243928  | COG2901 | L | "Factor for invasion stimulation Fis, transcriptional activator" | K03557 | INFORMATION STORAGE AND PROCESSING |
| DNA-binding protein Fis                   | 807798754.2 | 69681888.8  | 0.86243928  | COG2901 | L | "Factor for invasion stimulation Fis, transcriptional activator" | K03557 | INFORMATION STORAGE AND PROCESSING |
| DNA-binding protein Fis                   | 807798754.2 | 69681888.8  | 0.86243928  | COG2901 | L | "Factor for invasion stimulation Fis, transcriptional activator" | K03557 | INFORMATION STORAGE AND PROCESSING |
| DNA-binding protein Fis                   | 807798754.2 | 69681888.8  | 0.86243928  | COG2901 | L | "Factor for invasion stimulation Fis, transcriptional activator" | K03557 | INFORMATION STORAGE AND PROCESSING |
| DNA-binding protein Fis                   | 807798754.2 | 69681888.8  | 0.86243928  | COG2901 | L | "Factor for invasion stimulation Fis, transcriptional activator" | K03557 | INFORMATION STORAGE AND PROCESSING |
| DNA-binding protein Fis                   | 807798754.2 | 69681888.8  | 0.86243928  | COG2901 | L | "Factor for invasion stimulation Fis, transcriptional activator" | K03557 | INFORMATION STORAGE AND PROCESSING |
| DNA-binding protein Fis                   | 807798754.2 | 69681888.8  | 0.86243928  | COG2901 | L | "Factor for invasion stimulation Fis, transcriptional activator" | K03557 | INFORMATION STORAGE AND PROCESSING |
| DNA-binding protein Fis                   | 807798754.2 | 69681888.8  | 0.86243928  | COG2901 | L | "Factor for invasion stimulation Fis, transcriptional activator" | K03557 | INFORMATION STORAGE AND PROCESSING |
| DNA-binding protein Fis                   | 807798754.2 | 69681888.8  | 0.86243928  | COG2901 | L | "Factor for invasion stimulation Fis, transcriptional activator" | K03557 | INFORMATION STORAGE AND PROCESSING |
| DNA-binding protein Fis                   | 807798754.2 | 69681888.8  | 0.86243928  | COG2901 | L | "Factor for invasion stimulation Fis, transcriptional activator" | K03557 | INFORMATION STORAGE AND PROCESSING |
| DNA-binding protein Fis                   | 807798754.2 | 69681888.8  | 0.86243928  | COG2901 | L | "Factor for invasion stimulation Fis, transcriptional activator" | K03557 | INFORMATION STORAGE AND PROCESSING |
| DNA-binding protein Fis                   | 807798754.2 | 69681888.8  | 0.86243928  | COG2901 | L | "Factor for invasion stimulation Fis, transcriptional activator" | K03557 | INFORMATION STORAGE AND PROCESSING |
| DNA-binding protein Fis                   | 807798754.2 | 69681888.8  | 0.86243928  | COG2901 | L | "Factor for invasion stimulation Fis, transcriptional activator" | K03557 | INFORMATION STORAGE AND PROCESSING |
| DNA-binding protein Fis                   | 807798754.2 | 69681888.8  | 0.86243928  | COG2901 | L | "Factor for invasion stimulation Fis, transcriptional activator" | K03557 | INFORMATION STORAGE AND PROCESSING |
| DNA-binding protein Fis                   | 807798754.2 | 69681888.8  | 0.86243928  | COG2901 | L | "Factor for invasion stimulation Fis, transcriptional activator" | K03557 | INFORMATION STORAGE AND PROCESSING |
| DNA-binding protein Fis                   | 807798754.2 | 69681888.8  | 0.86243928  | COG2901 | L | "Factor for invasion stimulation Fis, transcriptional activator" | K03557 | INFORMATION STORAGE AND PROCESSING |
| DNA-binding protein Fis                   | 807798754.2 | 69681888.8  | 0.86243928  | COG2901 | L | "Factor for invasion stimulation Fis, transcriptional activator" | K03557 | INFORMATION STORAGE AND PROCESSING |
| DNA-binding protein Fis                   | 807798754.2 | 69681888.8  | 0.86243928  | COG2901 | L | "Factor for invasion stimulation Fis, transcriptional activator" | K03557 | INFORMATION STORAGE AND PROCESSING |
| DNA-binding protein Fis                   | 807798754.2 | 69681888.8  | 0.86243928  | COG2901 | L | "Factor for invasion stimulation Fis, transcriptional activator" | K03557 | INFORMATION STORAGE AND PROCESSING |
| DNA-binding protein Fis                   | 807798754.2 | 69681888.8  | 0.86243928  | COG2901 | L | "Factor for invasion stimulation Fis, transcriptional activator" | K03557 | INFORMATION STORAGE AND PROCESSING |
| DNA-binding protein Fis                   | 807798754.2 | 69681888.8  | 0.86243928  | COG2901 | L | "Factor for invasion stimulation Fis, transcriptional activator" | K03557 | INFORMATION STORAGE AND PROCESSING |
| DNA-binding protein Fis                   | 807798754.2 | 69681888.8  | 0.86243928  | COG2901 | L | "Factor for invasion stimulation Fis, transcriptional activator" | K03557 | INFORMATION STORAGE AND PROCESSING |
| DNA-binding protein Fis                   | 807798754.2 | 69681888.8  | 0.86243928  | COG2901 | L | "Factor for invasion stimulation Fis, transcriptional activator" | K03557 | INFORMATION STORAGE AND PROCESSING |
| DNA-binding protein Fis                   | 807798754.2 | 69681888.8  | 0.86243928  | COG2901 | L | "Factor for invasion stimulation Fis, transcriptional activator" | K03557 | INFORMATION STORAGE AND PROCESSING |
| DNA-binding protein Fis                   | 807798754.2 | 69681888.8  | 0.86243928  | COG2901 | L | "Factor for invasion stimulation Fis, transcriptional activator" | K03557 | INFORMATION STORAGE AND PROCESSING |
| DNA-binding protein Fis                   | 807798754.2 | 69681888.8  | 0.86243928  | COG2901 | L | "Factor for invasion stimulation Fis, transcriptional activator" | K03557 | INFORMATION STORAGE AND PROCESSING |
| DNA-binding protein Fis                   | 807798754.2 | 69681888.8  | 0.86243928  | COG2901 | L | "Factor for invasion stimulation Fis, transcriptional activator" | K03557 | INFORMATION STORAGE AND PROCESSING |
| DNA-binding protein Fis                   | 807798754.2 | 69681888.8  | 0.86243928  | COG2901 | L | "Factor for invasion stimulation Fis, transcriptional activator" | K03557 | INFORMATION STORAGE AND PROCESSING |
| DNA-binding protein Fis                   | 807798754.2 | 69681888.8  | 0.86243928  | COG2901 | L | "Factor for invasion stimulation Fis, transcriptional activator" | K03557 | INFORMATION STORAGE AND PROCESSING |
| DNA-binding protein Fis                   | 807798754.2 | 69681888.8  | 0.86243928  | COG2901 | L | "Factor for invasion stimulation Fis, transcriptional activator" | K03557 | INFORMATION STORAGE AND PROCESSING |
| DNA-binding protein Fis                   | 807798754.2 | 69681888.8  | 0.86243928  | COG2901 | L | "Factor for invasion stimulation Fis, transcriptional activator" | K03557 | INFORMATION STORAGE AND PROCESSING |
| DNA-binding protein Fis                   | 807798754.2 | 69681888.8  | 0.86243928  | COG2901 | L | "Factor for invasion stimulation Fis, transcriptional activator" | K03557 | INFORMATION STORAGE AND PROCESSING |
| DNA-binding protein Fis                   | 807798754.2 | 69681888.8  | 0.86243928  | COG2901 | L | "Factor for invasion stimulation Fis, transcriptional activator" | K03557 | INFORMATION STORAGE AND PROCESSING |
| DNA-binding protein Fis                   | 807798754.2 | 69681888.8  | 0.86243928  | COG2901 | L | "Factor for invasion stimulation Fis, transcriptional activator" | K03557 | INFORMATION STORAGE AND PROCESSING |
| DNA-binding protein Fis                   | 807798754.2 | 69681888.8  | 0.86        |         |   |                                                                  |        |                                    |

|        |       |                                                                               |             |             |             |         |   |                                                                                 |        |                                    |
|--------|-------|-------------------------------------------------------------------------------|-------------|-------------|-------------|---------|---|---------------------------------------------------------------------------------|--------|------------------------------------|
| PA5323 | argB  | acetylglutamate kinase                                                        | 531319725.1 | 341931308   | 0.643550939 | COG0548 | E | Acetylglutamate kinase                                                          | K00619 | METABOLISM                         |
| PA5325 | sphA  | SphA                                                                          | 30621452.77 | 0           | 0           |         |   |                                                                                 |        |                                    |
| PA5330 |       | hypothetical protein                                                          | 31687434.82 | 28003447.29 | 0.912142225 |         |   |                                                                                 |        |                                    |
| PA5335 |       | conserved hypothetical protein                                                | 41358668.76 | 74018754.24 | 1.789679321 |         |   |                                                                                 |        |                                    |
| PA5337 | rpoZ  | RNA polymerase omega subunit                                                  | 4582450507  | 5651858249  | 1.233370276 | COG1758 | K | "DNA-directed RNA polymerase, subunit K/omega"                                  | K03014 | INFORMATION STORAGE AND PROCESSING |
| PA5337 | rpoZ  | RNA polymerase omega subunit                                                  | 4582450507  | 5651858249  | 1.233370276 | COG1758 | K | "DNA-directed RNA polymerase, subunit K/omega"                                  | K03055 | INFORMATION STORAGE AND PROCESSING |
| PA5339 |       | conserved hypothetical protein                                                | 2502326244  | 2893611217  | 1.156366489 | COG0251 | J | "Putative translation initiation inhibitor, yjgF family"                        | K03060 | INFORMATION STORAGE AND PROCESSING |
| PA5340 |       | hypothetical protein                                                          | 304502842.7 | 53595553.75 | 0.176010028 |         |   |                                                                                 | K07567 | INFORMATION STORAGE AND PROCESSING |
| PA5348 |       | probable DNA-binding protein                                                  | 425038565.9 | 1089569809  | 2.563461052 | COG0776 | L | Bacterial nucleoid DNA-binding protein                                          | K04764 | INFORMATION STORAGE AND PROCESSING |
| PA5348 |       | probable DNA-binding protein                                                  | 425038565.9 | 1089569809  | 2.563461052 | COG0776 | L | Bacterial nucleoid DNA-binding protein                                          | K05787 | INFORMATION STORAGE AND PROCESSING |
| PA5348 |       | probable DNA-binding protein                                                  | 425038565.9 | 1089569809  | 2.563461052 | COG0776 | L | Bacterial nucleoid DNA-binding protein                                          | K03530 | INFORMATION STORAGE AND PROCESSING |
| PA5348 |       | probable DNA-binding protein                                                  | 425038565.9 | 1089569809  | 2.563461052 | COG0776 | L | Bacterial nucleoid DNA-binding protein                                          | K05788 | INFORMATION STORAGE AND PROCESSING |
| PA5355 | glcD  | glycolate oxidase subunit GlcD                                                | 0           | 137079664.9 | 1000        | COG0277 | C | FAD/FMN-containing dehydrogenases                                               | K11472 | METABOLISM                         |
| PA5355 | glcD  | glycolate oxidase subunit GlcD                                                | 0           | 137079664.9 | 1000        | COG0277 | C | FAD/FMN-containing dehydrogenases                                               | K06911 | METABOLISM                         |
| PA5355 | glcD  | glycolate oxidase subunit GlcD                                                | 0           | 137079664.9 | 1000        | COG0277 | C | FAD/FMN-containing dehydrogenases                                               | K03104 | METABOLISM                         |
| PA5355 | glcD  | glycolate oxidase subunit GlcD                                                | 0           | 137079664.9 | 1000        | COG0277 | C | FAD/FMN-containing dehydrogenases                                               | K00102 | METABOLISM                         |
| PA5359 |       | hypothetical protein                                                          | 23037303.06 | 0           | 0           |         |   |                                                                                 |        |                                    |
| PA5373 | betB  | betaine aldehyde dehydrogenase                                                | 0           | 25943335.88 | 1000        | COG1012 | C | NAD-dependent aldehyde dehydrogenases                                           | K00135 | METABOLISM                         |
| PA5373 | betB  | betaine aldehyde dehydrogenase                                                | 0           | 25943335.88 | 1000        | COG1012 | C | NAD-dependent aldehyde dehydrogenases                                           | K00140 | METABOLISM                         |
| PA5373 | betB  | betaine aldehyde dehydrogenase                                                | 0           | 25943335.88 | 1000        | COG1012 | C | NAD-dependent aldehyde dehydrogenases                                           | K00128 | METABOLISM                         |
| PA5373 | betB  | betaine aldehyde dehydrogenase                                                | 0           | 25943335.88 | 1000        | COG1012 | C | NAD-dependent aldehyde dehydrogenases                                           | K00130 | METABOLISM                         |
| PA5381 |       | hypothetical protein                                                          | 0           | 23994152.82 | 1000        |         |   |                                                                                 |        |                                    |
| PA5406 |       | hypothetical protein                                                          | 115291030   | 110741787.7 | 0.960541229 |         |   |                                                                                 |        |                                    |
| PA5407 |       | hypothetical protein                                                          | 25698074.16 | 0           | 0           | COG3027 | S | Uncharacterized protein conserved in bacteria                                   | K09888 | POORLY CHARACTERIZED               |
| PA5414 |       | hypothetical protein                                                          | 147881953.8 | 83353681.1  | 0.563650121 |         |   |                                                                                 |        |                                    |
| PA5427 | adhA  | alcohol dehydrogenase                                                         | 181968360.5 | 0           | 0           | COG1064 | R | Zn-dependent alcohol dehydrogenases                                             | K13979 | POORLY CHARACTERIZED               |
| PA5427 | adhA  | alcohol dehydrogenase                                                         | 181968360.5 | 0           | 0           | COG1064 | R | Zn-dependent alcohol dehydrogenases                                             | K13953 | POORLY CHARACTERIZED               |
| PA5427 | adhA  | alcohol dehydrogenase                                                         | 181968360.5 | 0           | 0           | COG1064 | R | Zn-dependent alcohol dehydrogenases                                             | K00001 | POORLY CHARACTERIZED               |
| PA5435 |       | probable transcarboxylase subunit                                             | 0           | 10761146.7  | 1000        | COG0511 | I | Biotin carboxyl carrier protein                                                 | K01571 | METABOLISM                         |
| PA5435 |       | probable transcarboxylase subunit                                             | 0           | 10761146.7  | 1000        | COG0511 | I | Biotin carboxyl carrier protein                                                 | K01571 | METABOLISM                         |
| PA5435 |       | probable transcarboxylase subunit                                             | 0           | 10761146.7  | 1000        | COG0511 | I | Biotin carboxyl carrier protein                                                 | K02160 | METABOLISM                         |
| PA5435 |       | probable transcarboxylase subunit                                             | 0           | 10761146.7  | 1000        | COG0511 | I | Biotin carboxyl carrier protein                                                 | K01960 | METABOLISM                         |
| PA5441 |       | hypothetical protein                                                          | 14656399.22 | 0           | 0           |         |   |                                                                                 | K01960 | METABOLISM                         |
| PA5472 |       | hypothetical protein                                                          | 293785043.9 | 82929974.75 | 0.282281132 | COG0834 | T | "ABC-type amino acid transport/signal transduction systems, periplasmic compon" | K02030 | CELLULAR PROCESSES AND SIGNALING   |
| PA5472 |       | hypothetical protein                                                          | 293785043.9 | 82929974.75 | 0.282281132 | COG0834 | E | "ABC-type amino acid transport/signal transduction systems, periplasmic compon" | K02030 | METABOLISM                         |
| PA5481 |       | hypothetical protein                                                          | 93942015.73 | 0           | 0           |         |   |                                                                                 |        |                                    |
| PA5487 |       | hypothetical protein                                                          | 13745139.98 | 97861726.8  | 7.119733009 | COG3706 | T | Response regulator containing a CheY-like receiver domain and a GGDEF domain    | K02488 | CELLULAR PROCESSES AND SIGNALING   |
| PA5489 | dsbA  | thiol:disulfide interchange protein DsbA                                      | 41898371.27 | 19502922.93 | 0.465481648 | COG1651 | O | Protein-disulfide isomerase                                                     | K03805 | CELLULAR PROCESSES AND SIGNALING   |
| PA5489 | dsbA  | thiol:disulfide interchange protein DsbA                                      | 41898371.27 | 19502922.93 | 0.465481648 | COG1651 | O | Protein-disulfide isomerase                                                     | K03981 | CELLULAR PROCESSES AND SIGNALING   |
| PA5490 | cc4   | cytochrome c4 precursor                                                       | 1498475823  | 2531687969  | 1.689508719 |         |   |                                                                                 |        |                                    |
| PA5494 |       | hypothetical protein                                                          | 315548189.3 | 95249014.43 | 0.301852515 |         |   |                                                                                 |        |                                    |
| PA5496 | nrdb  | "class II (cobalamin-dependent) ribonucleotide-diphosphate reductase subunit" | 235186173.4 | 521118356.8 | 2.215769529 |         |   |                                                                                 |        |                                    |
| PA5502 |       | hypothetical protein                                                          | 0           | 129359048.7 | 1000        |         |   |                                                                                 |        |                                    |
| PA5505 |       | probable TonB-dependent receptor                                              | 2422369052  | 59199072.57 | 2.44E-02    | COG1464 | P | "ABC-type metal ion transport system, periplasmic component/surface antigen"    | K02073 | METABOLISM                         |
| PA5528 |       | hypothetical protein                                                          | 620756591.9 | 197783463.9 | 0.318616776 |         |   |                                                                                 |        |                                    |
| PA5553 | atpC  | ATP synthase epsilon chain                                                    | 99153236.82 | 536871894.6 | 5.414567509 | COG0355 | C | "F0F1-type ATP synthase, epsilon subunit (mitochondrial delta subunit)"         | K02114 | METABOLISM                         |
| PA5554 | atpD  | ATP synthase beta chain                                                       | 119162088.7 | 206556795.8 | 1.733410333 | COG0055 | C | "F0F1-type ATP synthase, beta subunit"                                          | K02112 | METABOLISM                         |
| PA5554 | atpD  | ATP synthase beta chain                                                       | 119162088.7 | 206556795.8 | 1.733410333 | COG0055 | C | "F0F1-type ATP synthase, beta subunit"                                          | K02133 | METABOLISM                         |
| PA5555 | atpG  | ATP synthase gamma chain                                                      | 0           | 29571566.5  | 1000        | COG0224 | C | "F0F1-type ATP synthase, gamma subunit"                                         | K02115 | METABOLISM                         |
| PA5556 | atpA  | ATP synthase alpha chain                                                      | 673309745.7 | 1743107444  | 2.588864122 | COG0056 | C | "F0F1-type ATP synthase, alpha subunit"                                         | K02111 | METABOLISM                         |
| PA5557 | atpH  | ATP synthase delta chain                                                      | 5496053645  | 5101779167  | 0.928262238 | COG0712 | C | "F0F1-type ATP synthase, delta subunit (mitochondrial oligomycin sensitivity p" | K02113 | METABOLISM                         |
| PA5558 | atpF  | ATP synthase F chain                                                          | 13625972678 | 19048425913 | 1.39794981  | COG0711 | C | "F0F1-type ATP synthase, subunit b"                                             | K02109 | METABOLISM                         |
| PA5562 | spoOj | chromosome partitioning protein SpoOj                                         | 77251797.23 | 0           | 0           | COG1475 | K | Predicted transcriptional regulators                                            | K03497 | INFORMATION STORAGE AND PROCESSING |
| PA5568 |       | conserved hypothetical protein                                                | 0           | 93119964.15 | 1000        | COG0708 | U | Preprotein translocase subunit YidC                                             | K03217 | CELLULAR PROCESSES AND SIGNALING   |
| PA5570 | rpmH  | S05 ribosomal protein L34                                                     | 7186532610  | 1740227273  | 0.242151169 | COG0230 | J | Ribosomal protein L34                                                           | K02914 | INFORMATION STORAGE AND PROCESSING |

**Table. S4.** KEGG pathways of up-regulated proteins from the planktonic cells grown in control and antibiotic-impregnated catheters

| General description | Functional category                         | KEGG pathway                                                 | Count | Count (%) |
|---------------------|---------------------------------------------|--------------------------------------------------------------|-------|-----------|
| Metabolism          | Amino acid metabolism                       | pae00280 Valine, leucine and isoleucine degradation          | 31    | 2.35      |
|                     |                                             | pae00310 Lysine degradation                                  | 19    | 1.44      |
|                     |                                             | pae00380 Tryptophan metabolism                               | 18    | 1.36      |
|                     |                                             | pae00220 Arginine biosynthesis                               | 16    | 1.21      |
|                     |                                             | pae00260 Glycine, serine and threonine metabolism            | 15    | 1.14      |
|                     |                                             | pae00250 Alanine, aspartate and glutamate metabolism         | 14    | 1.06      |
|                     |                                             | pae00270 Cysteine and methionine metabolism                  | 12    | 0.91      |
|                     |                                             | pae00360 Phenylalanine metabolism                            | 10    | 0.76      |
|                     |                                             | pae00350 Tyrosine metabolism                                 | 6     | 0.45      |
|                     |                                             | pae00400 Phenylalanine, tyrosine and tryptophan biosynthesis | 5     | 0.38      |
|                     |                                             | pae00330 Arginine and proline metabolism                     | 5     | 0.38      |
|                     |                                             | pae00300 Lysine biosynthesis                                 | 5     | 0.38      |
|                     |                                             | pae00340 Histidine metabolism                                | 3     | 0.23      |
|                     |                                             | pae00290 Valine, leucine and isoleucine biosynthesis         | 3     | 0.23      |
|                     | Biosynthesis of other secondary metabolites | pae00405 Phenazine biosynthesis                              | 2     | 0.15      |
|                     |                                             | pae00261 Monobactam biosynthesis                             | 2     | 0.15      |
|                     |                                             | pae00401 Novobiocin biosynthesis                             | 2     | 0.15      |
|                     |                                             | pae00332 Carbapenem biosynthesis                             | 1     | 0.08      |
|                     |                                             | pae00521 Streptomycin biosynthesis                           | 1     | 0.08      |
|                     |                                             | pae00525 Acarbose and validamycin biosynthesis               | 1     | 0.08      |
|                     | Carbohydrate metabolism                     | pae00620 Pyruvate metabolism                                 | 34    | 2.58      |
|                     |                                             | pae00640 Propanoate metabolism                               | 31    | 2.35      |
|                     |                                             | pae00630 Glyoxylate and dicarboxylate metabolism             | 30    | 2.27      |
|                     |                                             | pae00020 Citrate cycle (TCA cycle)                           | 21    | 1.59      |
|                     |                                             | pae00650 Butanoate metabolism                                | 19    | 1.44      |
|                     |                                             | pae00010 Glycolysis/Gluconeogenesis                          | 17    | 1.29      |

|                                      |                                                       |     |       |
|--------------------------------------|-------------------------------------------------------|-----|-------|
|                                      | pae00030 Pentose phosphate pathway                    | 6   | 0.45  |
|                                      | pae00051 Fructose and mannose metabolism              | 3   | 0.23  |
|                                      | pae00660 C5-Branched dibasic acid metabolism          | 3   | 0.23  |
|                                      | pae00562 Inositol phosphate metabolism                | 3   | 0.23  |
|                                      | pae00053 Ascorbate and aldarate metabolism            | 2   | 0.15  |
|                                      | pae00520 Amino sugar and nucleotide sugar metabolism  | 2   | 0.15  |
|                                      | pae00040 Pentose and glucuronate interconversions     | 1   | 0.08  |
| Energy metabolism                    | pae00910 Nitrogen metabolism                          | 16  | 1.21  |
|                                      | pae00680 Methane metabolism                           | 11  | 0.83  |
|                                      | pae00190 Oxidative phosphorylation                    | 10  | 0.76  |
| Global and overview map              | pae01100 Metabolic pathways                           | 205 | 15.53 |
|                                      | pae01110 Biosynthesis of secondary metabolites        | 117 | 8.86  |
|                                      | pae01120 Microbial metabolism in diverse environments | 91  | 6.89  |
|                                      | pae01200 Carbon metabolism                            | 65  | 4.92  |
|                                      | pae01230 Biosynthesis of amino acids                  | 48  | 3.64  |
|                                      | pae01212 Fatty acid metabolism                        | 40  | 3.03  |
|                                      | pae01220 Degradation of aromatic compounds            | 2   | 0.15  |
|                                      | pae01210 2-Oxocarboxylic acid metabolism              | 8   | 0.61  |
| Glycan biosynthesis and metabolism   | pae00540 Lipopolysaccharide biosynthesis              | 2   | 0.15  |
|                                      | pae00550 Peptidoglycan biosynthesis                   | 1   | 0.08  |
| Lipid metabolism                     | pae00071 Fatty acid degradation                       | 24  | 1.82  |
|                                      | pae00061 Fatty acid biosynthesis                      | 19  | 1.44  |
|                                      | pae00072 Synthesis and degradation of ketone bodies   | 6   | 0.45  |
|                                      | pae00592 alpha-Linolenic acid metabolism              | 3   | 0.23  |
|                                      | pae00564 Glycerophospholipid metabolism               | 2   | 0.15  |
|                                      | pae00561 Glycerolipid metabolism                      | 2   | 0.15  |
|                                      | pae01040 Biosynthesis of unsaturated fatty acids      | 1   | 0.08  |
| Metabolism of cofactors and vitamins | pae00780 Biotin metabolism                            | 13  | 0.98  |
|                                      | pae00750 Vitamin B6 metabolism                        | 4   | 0.30  |
|                                      | pae00760 Nicotinate and nicotinamide metabolism       | 3   | 0.23  |



|                    |                                           |                                                                  |    |      |
|--------------------|-------------------------------------------|------------------------------------------------------------------|----|------|
|                    |                                           | pae00670 One carbon pool by folate                               | 3  | 0.23 |
|                    |                                           | pae00770 Pantothenate and CoA biosynthesis                       | 3  | 0.23 |
|                    |                                           | pae00790 Folate biosynthesis                                     | 2  | 0.15 |
|                    |                                           | pae00130 Ubiquinone and other terpenoid-quinone biosynthesis     | 2  | 0.15 |
|                    |                                           | pae00730 Thiamine metabolism                                     | 2  | 0.15 |
|                    |                                           | pae00740 Riboflavin metabolism                                   | 1  | 0.08 |
|                    | Metabolism of other amino acids           | pae00410 beta-Alanine metabolism                                 | 11 | 0.83 |
|                    |                                           | pae00480 Glutathione metabolism                                  | 7  | 0.53 |
|                    |                                           | pae00460 Cyanoamino acid metabolism                              | 7  | 0.53 |
|                    |                                           | pae00430 Taurine and hypotaurine metabolism                      | 3  | 0.23 |
|                    |                                           | pae00450 Selenocompound metabolism                               | 2  | 0.15 |
|                    |                                           | pae00440 Phosphonate and phosphinate metabolism                  | 1  | 0.08 |
|                    | Metabolism of terpenoids and polyketides  | pae00281 Geraniol degradation                                    | 9  | 0.68 |
|                    |                                           | pae00903 Limonene and pinene degradation                         | 8  | 0.61 |
|                    |                                           | pae00900 Terpenoid backbone biosynthesis                         | 7  | 0.53 |
|                    |                                           | pae00523 Polyketide sugar unit biosynthesis                      | 1  | 0.08 |
|                    |                                           | pae01053 Biosynthesis of siderophore group nonribosomal peptides | 1  | 0.08 |
|                    | Nucleotide metabolism                     | pae00230 Purine metabolism                                       | 12 | 0.91 |
|                    |                                           | pae00240 Pyrimidine metabolism                                   | 4  | 0.30 |
|                    | Xenobiotics biodegradation and metabolism | pae00362 Benzoate degradation                                    | 18 | 1.36 |
|                    |                                           | pae00930 Caprolactam degradation                                 | 6  | 0.45 |
|                    |                                           | pae00627 Aminobenzoate degradation                               | 4  | 0.30 |
|                    |                                           | pae00625 Chloroalkane and chloroalkene degradation               | 3  | 0.23 |
|                    |                                           | pae00626 Naphthalene degradation                                 | 1  | 0.08 |
| Cellular Processes | Cell motility                             | pae02030 Bacterial chemotaxis                                    | 23 | 1.74 |
|                    |                                           | pae02040 Flagellar assembly                                      | 4  | 0.30 |
|                    | Cellular community - prokaryotes          | pae02024 Quorum sensing                                          | 8  | 0.61 |
|                    | Signal transduction                       | pae02020 Two-component system                                    | 43 | 3.26 |
|                    | Membrane transport                        | pae03070 Bacterial secretion system                              | 15 | 1.14 |

|                                            |                                  |                                                           |    |      |
|--------------------------------------------|----------------------------------|-----------------------------------------------------------|----|------|
| Environmental<br>Information<br>Processing |                                  | pae02010 ABC transporters                                 | 2  | 0.15 |
|                                            |                                  | pae02060 Phosphotransferase system (PTS)                  | 1  | 0.08 |
| Genetic<br>Information<br>Processing       | Translation                      | pae03010 Ribosome                                         | 24 | 1.82 |
|                                            |                                  | pae00970 Aminoacyl-tRNA biosynthesis                      | 11 | 0.83 |
|                                            | Folding, sorting and degradation | pae03018 RNA degradation                                  | 6  | 0.45 |
|                                            |                                  | pae03060 Protein export                                   | 5  | 0.38 |
|                                            |                                  | pae00920 Sulfur metabolism                                | 4  | 0.30 |
|                                            |                                  | pae04122 Sulfur relay system                              | 4  | 0.30 |
|                                            | Transcription                    | pae03020 RNA polymerase                                   | 3  | 0.23 |
|                                            |                                  | pae03430 Mismatch repair                                  | 1  | 0.08 |
|                                            | Replication and repair           | pae03030 DNA replication                                  | 1  | 0.08 |
|                                            |                                  | pae03440 Homologous recombination                         | 1  | 0.08 |
| Human<br>Diseases                          | Drug resistance: antimicrobial   | pae01503 Cationic antimicrobial peptide (CAMP) resistance | 6  | 0.45 |
|                                            |                                  | pae01501 beta-Lactam resistance                           | 4  | 0.30 |

**Table. S5.** KEGG pathways of down-regulated proteins from the planktonic cells grown in control and antibiotic-impregnated catheters

| General description | Functional category                         | KEGG pathway                                                 | Count | Count (%) |
|---------------------|---------------------------------------------|--------------------------------------------------------------|-------|-----------|
| Metabolism          | Amino acid metabolism                       | pae00380 Tryptophan metabolism                               | 8     | 1.99      |
|                     |                                             | pae00360 Phenylalanine metabolism                            | 7     | 1.74      |
|                     |                                             | pae00330 Arginine and proline metabolism                     | 6     | 1.49      |
|                     |                                             | pae00400 Phenylalanine, tyrosine and tryptophan biosynthesis | 5     | 1.24      |
|                     |                                             | pae00260 Glycine, serine and threonine metabolism            | 4     | 0.99      |
|                     |                                             | pae00250 Alanine, aspartate and glutamate metabolism         | 3     | 0.74      |
|                     |                                             | pae00270 Cysteine and methionine metabolism                  | 3     | 0.74      |
|                     |                                             | pae00220 Arginine biosynthesis                               | 2     | 0.50      |
|                     |                                             | pae00290 Valine, leucine and isoleucine biosynthesis         | 1     | 0.25      |
|                     |                                             | pae00280 Valine, leucine and isoleucine degradation          | 1     | 0.25      |
|                     |                                             | pae00300 Lysine biosynthesis                                 | 1     | 0.25      |
|                     | Biosynthesis of other secondary metabolites | pae00261 Monobactam biosynthesis                             | 1     | 0.25      |
|                     | Carbohydrate metabolism                     | pae00630 Glyoxylate and dicarboxylate metabolism             | 9     | 2.23      |
|                     |                                             | pae00010 Glycolysis / Gluconeogenesis                        | 3     | 0.74      |
|                     |                                             | pae00020 Citrate cycle (TCA cycle)                           | 2     | 0.50      |
|                     |                                             | pae00030 Pentose phosphate pathway                           | 1     | 0.25      |
|                     |                                             | pae00640 Propanoate metabolism                               | 1     | 0.25      |
|                     |                                             | pae00620 Pyruvate metabolism                                 | 1     | 0.25      |
|                     |                                             | pae00051 Fructose and mannose metabolism                     | 1     | 0.25      |
|                     |                                             | pae00562 Inositol phosphate metabolism                       | 1     | 0.25      |
|                     | Energy metabolism                           | pae00190 Oxidative phosphorylation                           | 3     | 0.74      |
|                     |                                             | pae00920 Sulfur metabolism                                   | 3     | 0.74      |
|                     |                                             | pae00680 Methane metabolism                                  | 3     | 0.74      |
|                     | Global and overview map                     | pae01100 Metabolic pathways                                  | 64    | 15.88     |
|                     |                                             | pae01110 Biosynthesis of secondary metabolites               | 35    | 8.68      |

|                    |                                           |                                                                  |    |      |
|--------------------|-------------------------------------------|------------------------------------------------------------------|----|------|
|                    |                                           | pae01120 Microbial metabolism in diverse environments            | 19 | 4.71 |
|                    |                                           | pae01230 Biosynthesis of amino acids                             | 14 | 3.47 |
|                    |                                           | pae01200 Carbon metabolism                                       | 12 | 2.98 |
|                    |                                           | pae01212 Fatty acid metabolism                                   | 10 | 2.48 |
|                    |                                           | pae01220 Degradation of aromatic compounds                       | 3  | 0.74 |
|                    |                                           | pae01210 2-Oxocarboxylic acid metabolism                         | 4  | 0.99 |
|                    | Lipid metabolism                          | pae00061 Fatty acid biosynthesis                                 | 10 | 2.48 |
|                    |                                           | pae00071 Fatty acid degradation                                  | 2  | 0.50 |
|                    | Metabolism of cofactors and vitamins      | pae00780 Biotin metabolism                                       | 8  | 1.99 |
|                    |                                           | pae00860 Porphyrin and chlorophyll metabolism                    | 3  | 0.74 |
|                    |                                           | pae00770 Pantothenate and CoA biosynthesis                       | 2  | 0.50 |
|                    |                                           | pae00760 Nicotinate and nicotinamide metabolism                  | 2  | 0.50 |
|                    |                                           | pae00730 Thiamine metabolism                                     | 2  | 0.50 |
|                    | Metabolism of other amino acids           | pae00480 Glutathione metabolism                                  | 1  | 0.25 |
|                    |                                           | pae00410 beta-Alanine metabolism                                 | 1  | 0.25 |
|                    | Metabolism of terpenoids and polyketides  | pae01053 Biosynthesis of siderophore group nonribosomal peptides | 1  | 0.25 |
|                    | Nucleotide metabolism                     | pae00230 Purine metabolism                                       | 3  | 0.74 |
|                    | Xenobiotics biodegradation and metabolism | pae00627 Aminobenzoate degradation                               | 5  | 1.24 |
|                    |                                           | pae00643 Styrene degradation                                     | 5  | 1.24 |
|                    |                                           | pae00362 Benzoate degradation                                    | 3  | 0.74 |
|                    |                                           | pae00623 Toluene degradation                                     | 1  | 0.25 |
|                    |                                           | pae00364 Fluorobenzoate degradation                              | 1  | 0.25 |
|                    |                                           | pae00361 Chlorocyclohexane and chlorobenzene degradation         | 1  | 0.25 |
| Cellular Processes | Cell motility                             | pae02030 Bacterial chemotaxis                                    | 20 | 4.96 |
|                    |                                           | pae02040 Flagellar assembly                                      | 9  | 2.23 |
|                    | Cellular community - prokaryotes          | pae02024 Quorum sensing                                          | 14 | 3.47 |
|                    |                                           | pae02025 Biofilm formation                                       | 4  | 0.99 |
|                    | Signal transduction                       | pae02020 Two-component system                                    | 28 | 6.95 |
|                    | Membrane transport                        | pae02010 ABC transporters                                        | 16 | 3.97 |

|                                            |                                  |                                                           |    |      |
|--------------------------------------------|----------------------------------|-----------------------------------------------------------|----|------|
| Environmental<br>Information<br>Processing |                                  | pae03070 Bacterial secretion system                       | 15 | 3.72 |
|                                            |                                  | pae02060 Phosphotransferase system (PTS)                  | 1  | 0.25 |
| Genetic<br>Information<br>Processing       | Translation                      | pae03010 Ribosome                                         | 3  | 0.74 |
|                                            |                                  | pae00970 Aminoacyl-tRNA biosynthesis                      | 2  | 0.50 |
|                                            | Folding, sorting and degradation | pae03060 Protein export                                   | 2  | 0.50 |
|                                            |                                  | pae03018 RNA degradation                                  | 1  | 0.25 |
|                                            | Replication and repair           | pae03030 DNA replication                                  | 1  | 0.25 |
|                                            |                                  | pae03440 Homologous recombination                         | 1  | 0.25 |
| Human<br>Diseases                          | Drug resistance: antimicrobial   | pae01501 beta-Lactam resistance                           | 2  | 0.50 |
|                                            |                                  | pae01503 Cationic antimicrobial peptide (CAMP) resistance | 2  | 0.50 |

**Table. S6.** KEGG pathways of up-regulated proteins from the biofilm cells grown in control and antibiotic-impregnated catheters

| General description | Functional category     | KEGG pathway                                         | Count | Count (%) |
|---------------------|-------------------------|------------------------------------------------------|-------|-----------|
| Metabolism          | Amino acid metabolism   | pae00270 Cysteine and methionine metabolism          | 5     | 1.42      |
|                     |                         | pae00280 Valine, leucine and isoleucine degradation  | 5     | 1.42      |
|                     |                         | pae00310 Lysine degradation                          | 3     | 0.85      |
|                     |                         | pae00260 Glycine, serine and threonine metabolism    | 3     | 0.85      |
|                     |                         | pae00380 Tryptophan metabolism                       | 3     | 0.85      |
|                     |                         | pae00340 Histidine metabolism                        | 2     | 0.57      |
|                     |                         | pae00330 Arginine and proline metabolism             | 2     | 0.57      |
|                     |                         | pae00350 Tyrosine metabolism                         | 1     | 0.28      |
|                     |                         | pae00250 Alanine, aspartate and glutamate metabolism | 1     | 0.28      |
|                     |                         | pae00220 Arginine biosynthesis                       | 1     | 0.28      |
|                     | Carbohydrate metabolism | pae00620 Pyruvate metabolism                         | 11    | 3.13      |
|                     |                         | pae00020 Citrate cycle (TCA cycle)                   | 7     | 1.99      |
|                     |                         | pae00640 Propanoate metabolism                       | 7     | 1.99      |
|                     |                         | pae00010 Glycolysis / Gluconeogenesis                | 4     | 1.14      |
|                     |                         | pae00630 Glyoxylate and dicarboxylate metabolism     | 3     | 0.85      |
|                     |                         | pae00562 Inositol phosphate metabolism               | 3     | 0.85      |
|                     |                         | pae00053 Ascorbate and aldarate metabolism           | 2     | 0.57      |
|                     |                         | pae00030 Pentose phosphate pathway                   | 2     | 0.57      |
|                     |                         | pae00660 C5-Branched dibasic acid metabolism         | 1     | 0.28      |
|                     |                         | pae00650 Butanoate metabolism                        | 1     | 0.28      |
|                     |                         | pae00040 Pentose and glucuronate interconversions    | 1     | 0.28      |
|                     |                         | pae00051 Fructose and mannose metabolism             | 1     | 0.28      |
|                     | Energy metabolism       | pae00190 Oxidative phosphorylation                   | 9     | 2.56      |
|                     |                         | pae00680 Methane metabolism                          | 1     | 0.28      |
|                     |                         | pae00910 Nitrogen metabolism                         | 1     | 0.28      |
|                     | Global and overview map | pae01100 Metabolic pathways                          | 52    | 14.77     |

|                    |                                           |                                                          |    |      |
|--------------------|-------------------------------------------|----------------------------------------------------------|----|------|
|                    |                                           | pae01120 Microbial metabolism in diverse environments    | 28 | 7.95 |
|                    |                                           | pae01110 Biosynthesis of secondary metabolites           | 23 | 6.53 |
|                    |                                           | pae01200 Carbon metabolism                               | 21 | 5.97 |
|                    |                                           | pae01230 Biosynthesis of amino acids                     | 9  | 2.56 |
|                    |                                           | pae01212 Fatty acid metabolism                           | 3  | 0.85 |
|                    |                                           | pae01210 2-Oxocarboxylic acid metabolism                 | 2  | 0.57 |
|                    |                                           | pae01220 Degradation of aromatic compounds               | 3  | 0.85 |
|                    | Glycan biosynthesis and metabolism        | pae00540 Lipopolysaccharide biosynthesis                 | 1  | 0.28 |
|                    |                                           | pae00061 Fatty acid biosynthesis                         | 3  | 0.85 |
|                    | Lipid metabolism                          | pae00564 Glycerophospholipid metabolism                  | 2  | 0.57 |
|                    |                                           | pae00071 Fatty acid degradation                          | 2  | 0.57 |
|                    |                                           | pae00561 Glycerolipid metabolism                         | 2  | 0.57 |
|                    |                                           | pae00790 Folate biosynthesis                             | 4  | 1.14 |
|                    | Metabolism of cofactors and vitamins      | pae00670 One carbon pool by folate                       | 1  | 0.28 |
|                    |                                           | pae00750 Vitamin B6 metabolism                           | 1  | 0.28 |
|                    |                                           | pae00760 Nicotinate and nicotinamide metabolism          | 1  | 0.28 |
|                    | Metabolism of other amino acids           | pae00410 beta-Alanine metabolism                         | 5  | 1.42 |
|                    |                                           | pae00480 Glutathione metabolism                          | 2  | 0.57 |
|                    | Metabolism of terpenoids and polyketides  | pae00903 Limonene and pinene degradation                 | 2  | 0.57 |
|                    | Nucleotide metabolism                     | pae00230 Purine metabolism                               | 4  | 1.14 |
|                    |                                           | pae00240 Pyrimidine metabolism                           | 1  | 0.28 |
|                    |                                           | pae00362 Benzoate degradation                            | 3  | 0.85 |
|                    |                                           | pae00625 Chloroalkane and chloroalkene degradation       | 2  | 0.57 |
|                    | Xenobiotics biodegradation and metabolism | pae00633 Nitrotoluene degradation                        | 2  | 0.57 |
|                    |                                           | pae00623 Toluene degradation                             | 1  | 0.28 |
|                    |                                           | pae00361 Chlorocyclohexane and chlorobenzene degradation | 1  | 0.28 |
|                    |                                           | pae00364 Fluorobenzoate degradation                      | 1  | 0.28 |
| Cellular Processes | Cell motility                             | pae02030 Bacterial chemotaxis                            | 20 | 5.68 |
|                    |                                           | pae02040 Flagellar assembly                              | 1  | 0.28 |

|                                            |                                  |                                                           |    |      |
|--------------------------------------------|----------------------------------|-----------------------------------------------------------|----|------|
|                                            | Cellular community - prokaryotes | pae02024 Quorum sensing                                   | 4  | 1.14 |
| Environmental<br>Information<br>Processing | Signal transduction              | pae02020 Two-component system                             | 29 | 8.24 |
|                                            | Membrane transport               | pae03070 Bacterial secretion system                       | 6  | 1.70 |
| Genetic<br>Information<br>Processing       | Translation                      | pae03010 Ribosome                                         | 12 | 3.41 |
|                                            |                                  | pae00970 Aminoacyl-tRNA biosynthesis                      | 3  | 0.85 |
|                                            | Folding, sorting and degradation | pae00920 Sulfur metabolism                                | 3  | 0.85 |
|                                            |                                  | pae03060 Protein export                                   | 3  | 0.85 |
|                                            |                                  | pae04122 Sulfur relay system                              | 2  | 0.57 |
|                                            |                                  | pae03018 RNA degradation                                  | 1  | 0.28 |
|                                            | Transcription                    | pae03020 RNA polymerase                                   | 1  | 0.28 |
|                                            | Replication and repair           | pae03430 Mismatch repair                                  | 1  | 0.28 |
| Human<br>Diseases                          | Drug resistance: antimicrobial   | pae01501 beta-Lactam resistance                           | 2  | 0.57 |
|                                            |                                  | pae01503 Cationic antimicrobial peptide (CAMP) resistance | 2  | 0.57 |



**Table. S7.** KEGG pathways of down-regulated proteins from the biofilm cells grown in control and antibiotic-impregnated catheters

| General description | Functional category     | KEGG pathway                                                 | Count | Count (%) |
|---------------------|-------------------------|--------------------------------------------------------------|-------|-----------|
| Metabolism          | Amino acid metabolism   | pae00260 Glycine, serine and threonine metabolism            | 5     | 1.24      |
|                     |                         | pae00400 Phenylalanine, tyrosine and tryptophan biosynthesis | 5     | 1.24      |
|                     |                         | pae00350 Tyrosine metabolism                                 | 4     | 0.99      |
|                     |                         | pae00380 Tryptophan metabolism                               | 3     | 0.74      |
|                     |                         | pae00270 Cysteine and methionine metabolism                  | 3     | 0.74      |
|                     |                         | pae00220 Arginine biosynthesis                               | 3     | 0.74      |
|                     |                         | pae00360 Phenylalanine metabolism                            | 2     | 0.50      |
|                     |                         | pae00280 Valine, leucine and isoleucine degradation          | 1     | 0.25      |
|                     |                         | pae00250 Alanine, aspartate and glutamate metabolism         | 1     | 0.25      |
|                     |                         | pae00340 Histidine metabolism                                | 1     | 0.25      |
|                     | Carbohydrate metabolism | pae00630 Glyoxylate and dicarboxylate metabolism             | 10    | 2.48      |
|                     |                         | pae00620 Pyruvate metabolism                                 | 5     | 1.24      |
|                     |                         | pae00010 Glycolysis/Gluconeogenesis                          | 5     | 1.24      |
|                     |                         | pae00030 Pentose phosphate pathway                           | 4     | 0.99      |
|                     |                         | pae00051 Fructose and mannose metabolism                     | 3     | 0.74      |
|                     |                         | pae00640 Propanoate metabolism                               | 3     | 0.74      |
|                     |                         | pae00020 Citrate cycle (TCA cycle)                           | 1     | 0.25      |
|                     |                         | pae00562 Inositol phosphate metabolism                       | 1     | 0.25      |
|                     | Energy metabolism       | pae00680 Methane metabolism                                  | 2     | 0.50      |
|                     |                         | pae00920 Sulfur metabolism                                   | 2     | 0.50      |
|                     |                         | pae00190 Oxidative phosphorylation                           | 1     | 0.25      |
|                     | Global and overview map | pae01100 Metabolic pathways                                  | 65    | 16.09     |
|                     |                         | pae01110 Biosynthesis of secondary metabolites               | 37    | 9.16      |
|                     |                         | pae01120 Microbial metabolism in diverse environments        | 19    | 4.70      |
|                     |                         | pae01200 Carbon metabolism                                   | 14    | 3.47      |
|                     |                         | pae01230 Biosynthesis of amino acids                         | 13    | 3.22      |
|                     |                         | pae01220 Degradation of aromatic compounds                   | 4     | 0.99      |

|                                      |                                           |                                                                  |    |      |
|--------------------------------------|-------------------------------------------|------------------------------------------------------------------|----|------|
|                                      |                                           | pae01212 Fatty acid metabolism                                   | 2  | 0.50 |
|                                      | Glycan biosynthesis and metabolism        | pae00540 Lipopolysaccharide biosynthesis                         | 2  | 0.50 |
|                                      |                                           | pae00550 Peptidoglycan biosynthesis                              | 1  | 0.25 |
|                                      | Lipid metabolism                          | pae00061 Fatty acid biosynthesis                                 | 2  | 0.50 |
|                                      |                                           | pae00071 Fatty acid degradation                                  | 1  | 0.25 |
|                                      |                                           | pae01040 Biosynthesis of unsaturated fatty acids                 | 1  | 0.25 |
|                                      | Metabolism of cofactors and vitamins      | pae00730 Thiamine metabolism                                     | 3  | 0.74 |
|                                      |                                           | pae00790 Folate biosynthesis                                     | 1  | 0.25 |
|                                      |                                           | pae00760 Nicotinate and nicotinamide metabolism                  | 1  | 0.25 |
|                                      |                                           | pae00770 Pantothenate and CoA biosynthesis                       | 1  | 0.25 |
|                                      | Metabolism of other amino acids           | pae00460 Cyanoamino acid metabolism                              | 3  | 0.74 |
|                                      |                                           | pae00480 Glutathione metabolism                                  | 3  | 0.74 |
|                                      |                                           | pae00430 Taurine and hypotaurine metabolism                      | 3  | 0.74 |
|                                      | Metabolism of terpenoids and polyketides  | pae01053 Biosynthesis of siderophore group nonribosomal peptides | 1  | 0.25 |
|                                      |                                           | pae00900 Terpenoid backbone biosynthesis                         | 1  | 0.25 |
|                                      | Nucleotide metabolism                     | pae00230 Purine metabolism                                       | 7  | 1.73 |
|                                      |                                           | pae00240 Pyrimidine metabolism                                   | 4  | 0.99 |
|                                      | Xenobiotics biodegradation and metabolism | pae00362 Benzoate degradation                                    | 1  | 0.25 |
|                                      |                                           | pae00626 Naphthalene degradation                                 | 1  | 0.25 |
|                                      |                                           | pae00643 Styrene degradation                                     | 1  | 0.25 |
|                                      |                                           | pae00625 Chloroalkane and chloroalkene degradation               | 1  | 0.25 |
| Cellular Processes                   | Cell motility                             | pae02030 Bacterial chemotaxis                                    | 26 | 6.44 |
|                                      |                                           | pae02040 Flagellar assembly                                      | 4  | 0.99 |
|                                      | Cellular community - prokaryotes          | pae02024 Quorum sensing                                          | 15 | 3.71 |
|                                      |                                           | pae02025 Biofilm formation                                       | 8  | 1.98 |
| Environmental Information Processing | Signal transduction                       | pae02020 Two-component system                                    | 28 | 6.93 |
|                                      |                                           | pae02010 ABC transporters                                        | 22 | 5.45 |
|                                      | Membrane transport                        | pae03070 Bacterial secretion system                              | 13 | 3.22 |
|                                      |                                           | pae02060 Phosphotransferase system (PTS)                         | 3  | 0.74 |
|                                      | Translation                               | pae03010 Ribosome                                                | 11 | 2.72 |

|                                      |                                  |                                                           |   |      |
|--------------------------------------|----------------------------------|-----------------------------------------------------------|---|------|
| Genetic<br>Information<br>Processing | Folding, sorting and degradation | pae00970 Aminoacyl-tRNA biosynthesis                      | 1 | 0.25 |
|                                      |                                  | pae04122 Sulfur relay system                              | 4 | 0.99 |
|                                      |                                  | pae03018 RNA degradation                                  | 2 | 0.50 |
|                                      |                                  | pae03060 Protein export                                   | 1 | 0.25 |
|                                      | Replication and repair           | pae03430 Mismatch repair                                  | 2 | 0.50 |
|                                      |                                  | pae03440 Homologous recombination                         | 2 | 0.50 |
|                                      |                                  | pae03030 DNA replication                                  | 2 | 0.50 |
| Human<br>Diseases                    | Drug resistance: antimicrobial   | pae01503 Cationic antimicrobial peptide (CAMP) resistance | 2 | 0.50 |

**Fig. S1. Top 25 KEGG pathways of up-regulated proteins from the planktonic cells grown in control and antibiotic-impregnated catheters**

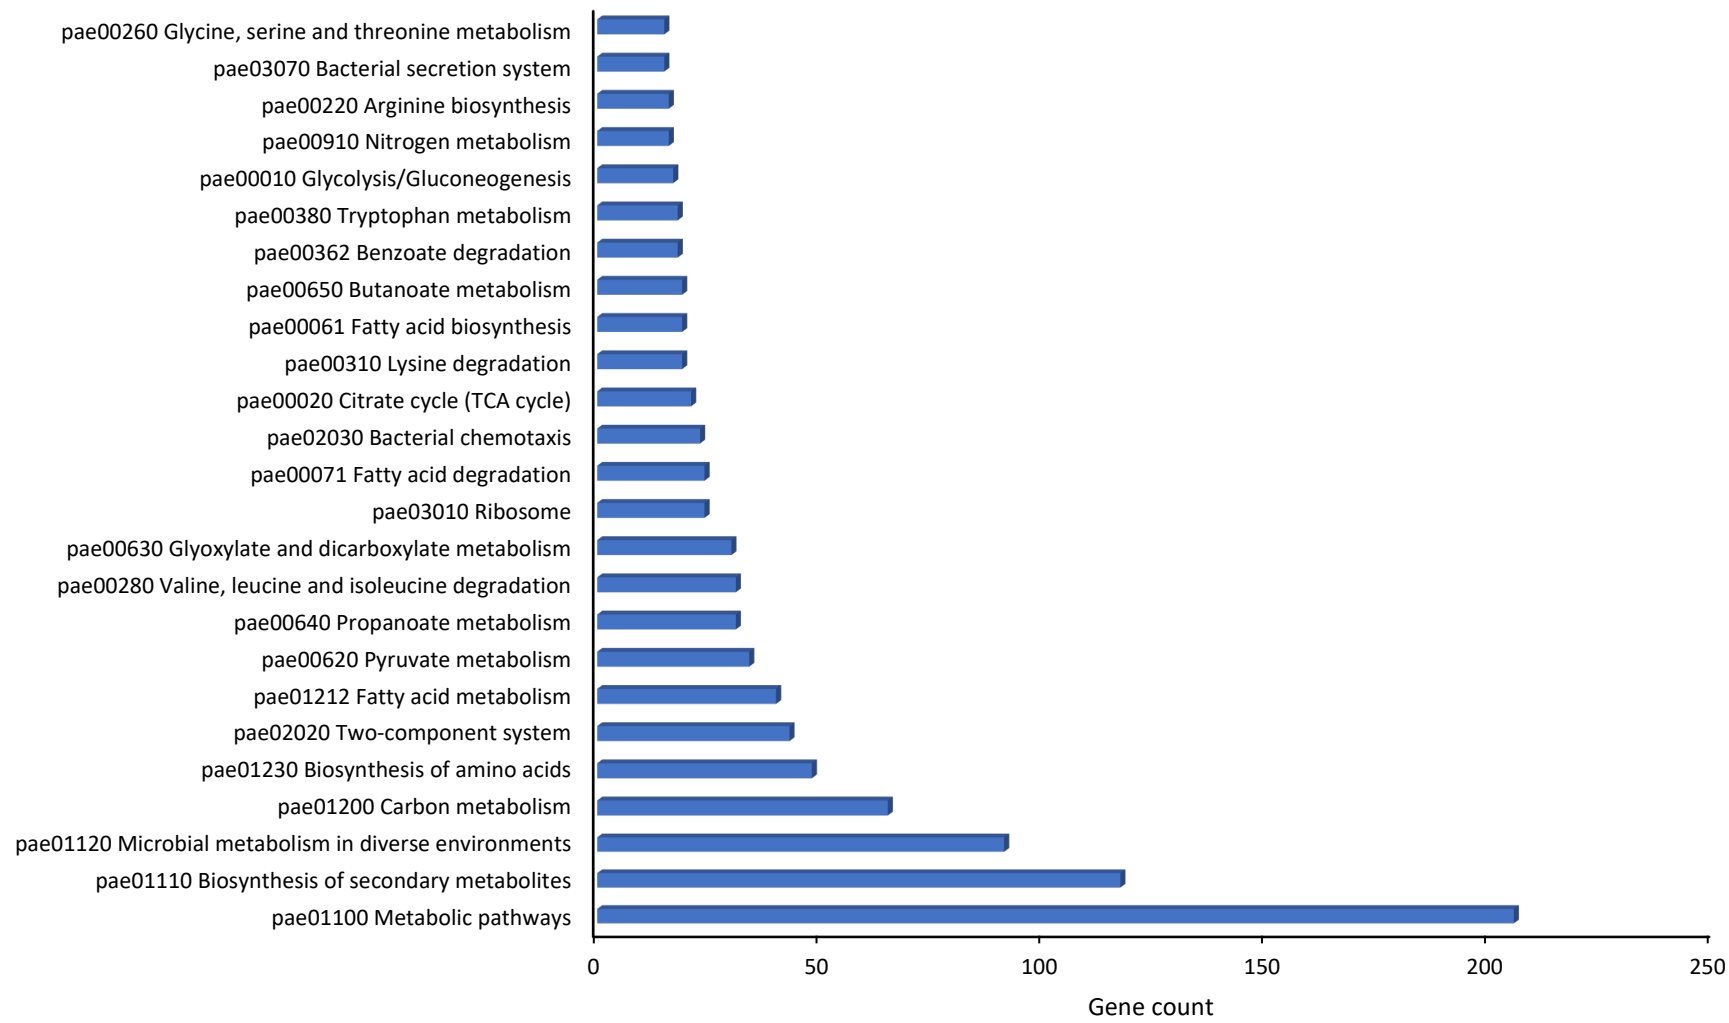

**Fig. S2. Top 25 KEGG pathways of down-regulated proteins from the planktonic cells grown in control and antibiotic-impregnated catheter**

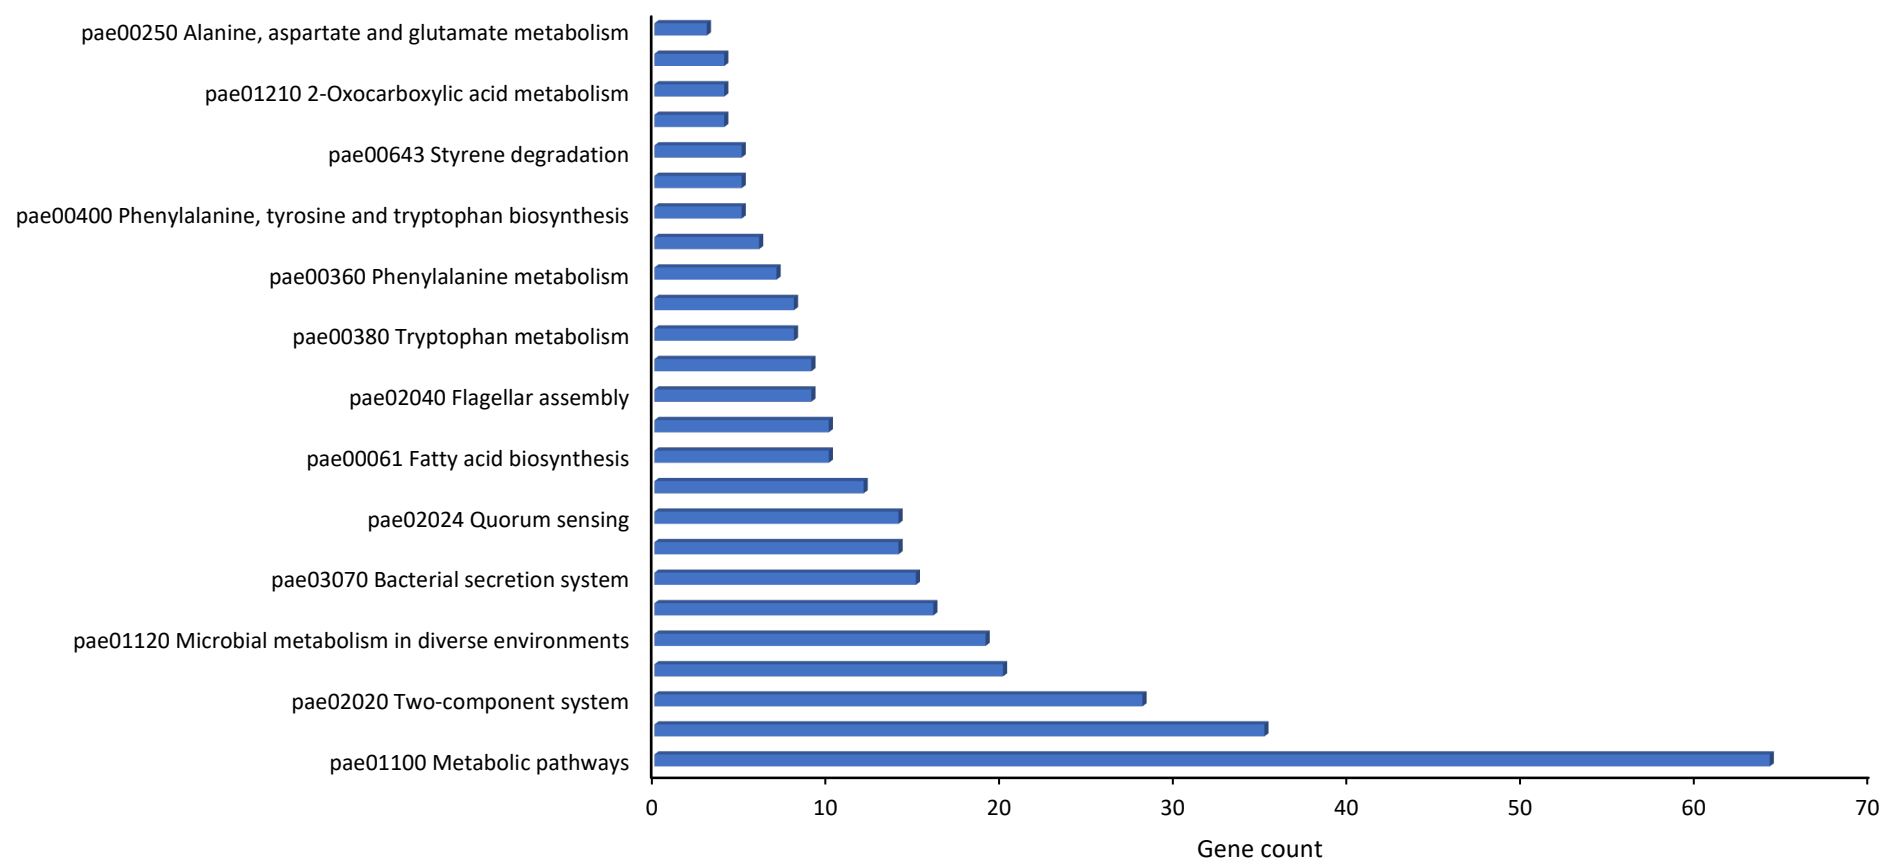

**Fig. S3. Top 25 KEGG pathways of up-regulated proteins from the biofilm cells grown in control and antibiotic-impregnated catheters**

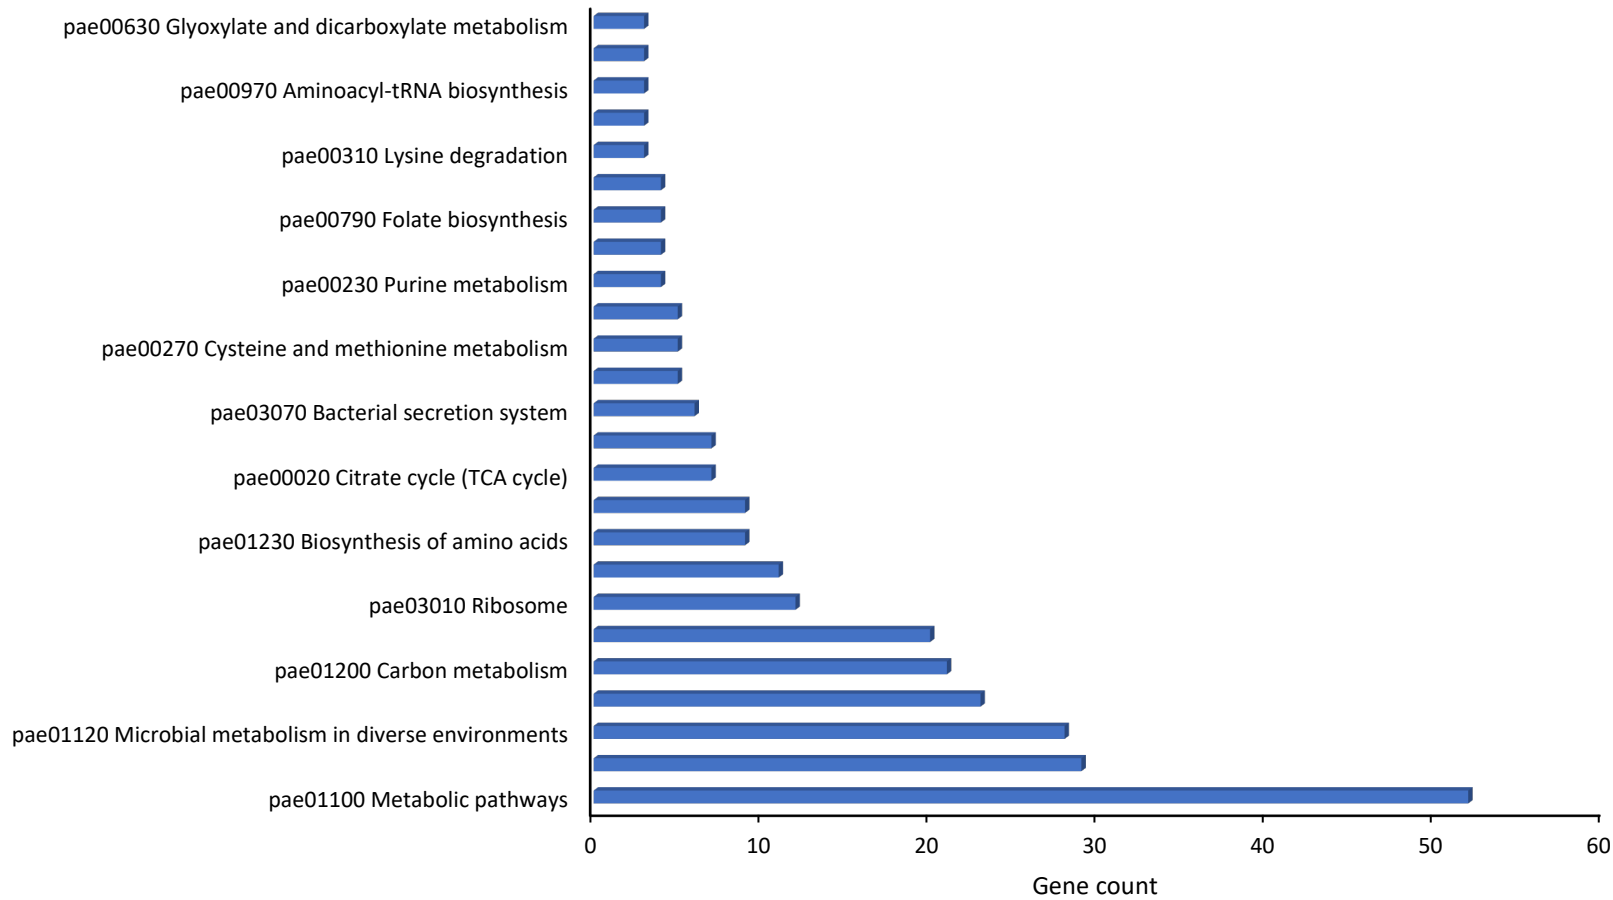

**Fig. S4. Top 25 KEGG pathways of down-regulated proteins from the biofilm cells grown in control and antibiotic-impregnated catheters**

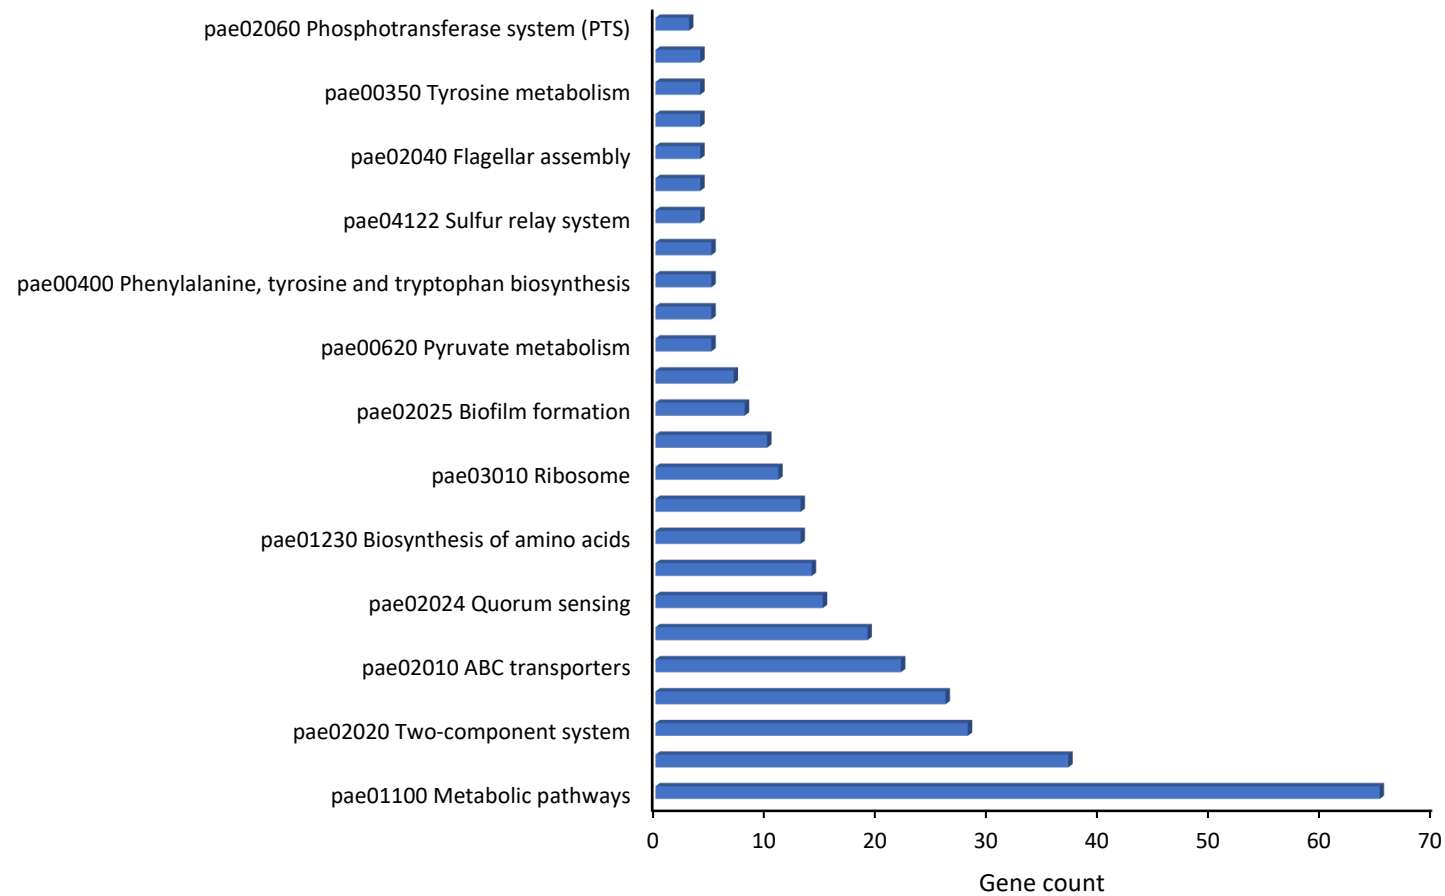

Supplement: s1 [file s1]
